# Supplementary material for: Sampling in Difficult Settings: A Simulation Study Comparing Several Sampling Methods
Source: Research Square preprint supplement (doi:10.21203/rs.3.rs-85299/v1), 2020-10-07
Supplement: Supplementary file 1 [file 65255496890b845640eab798.xlsx]

## Sheet: parameters
Parameter	input	values
seed	custom	3
target_prevalence	range	0.1	0.5	0.008
towns	custom	300
town_size_min	custom	400
town_size_max	default	250000
town_size_shape	custom	0.785
tile_x	default	10
tile_y	default	10
tile_width	default	1
popdens_mx	range	0	1	0.02
popdens_my	range	0	1	0.02
mean_household_pop	range	2	5	0.06
river_probability	default	0
river_width	default	0
disease_pockets	range	0	10	1
pocket_kernel_type	array	exponential	inverse_square	gaussian
pocket_scaling	range	0.5	2	0.03
mean_income_b00	array	0.75,0,0	0.75,0,0.05	0.75,0,0.1	0.75,0,0.15	0.75,0,0.2	0.75,0,0.25	0.75,0,0.3	0.75,0.05,0	0.75,0.05,0.05	0.75,0.05,0.1	0.75,0.05,0.15	0.75,0.05,0.2	0.75,0.05,0.25	0.75,0.05,0.3	0.75,0.1,0	0.75,0.1,0.05	0.75,0.1,0.1	0.75,0.1,0.15	0.75,0.1,0.2	0.75,0.1,0.25	0.75,0.1,0.3	0.75,0.15,0	0.75,0.15,0.05	0.75,0.15,0.1	0.75,0.15,0.15	0.75,0.15,0.2	0.75,0.15,0.25	0.75,0.15,0.3	0.75,0.2,0	0.75,0.2,0.05	0.75,0.2,0.1	0.75,0.2,0.15	0.75,0.2,0.2	0.75,0.2,0.25	0.75,0.2,0.3	0.75,0.25,0	0.75,0.25,0.05	0.75,0.25,0.1	0.75,0.25,0.15	0.75,0.25,0.2	0.75,0.25,0.25	0.75,0.25,0.3	0.75,0.3,0	0.75,0.3,0.05	0.75,0.3,0.1	0.75,0.3,0.15	0.75,0.3,0.2	0.75,0.3,0.25
mean_income_b01	array	0.0714,0,0	0.0714,0,0.01	0.0714,0,0.02	0.0714,0,0.03	0.0714,0,0.04	0.0714,0,0.05	0.0714,0,0.06	0.0714,0.03,0	0.0714,0.03,0.01	0.0714,0.03,0.02	0.0714,0.03,0.03	0.0714,0.03,0.04	0.0714,0.03,0.05	0.0714,0.03,0.06	0.0714,0.06,0	0.0714,0.06,0.01	0.0714,0.06,0.02	0.0714,0.06,0.03	0.0714,0.06,0.04	0.0714,0.06,0.05	0.0714,0.06,0.06	0.0714,0.09,0	0.0714,0.09,0.01	0.0714,0.09,0.02	0.0714,0.09,0.03	0.0714,0.09,0.04	0.0714,0.09,0.05	0.0714,0.09,0.06	0.0714,0.12,0	0.0714,0.12,0.01	0.0714,0.12,0.02	0.0714,0.12,0.03	0.0714,0.12,0.04	0.0714,0.12,0.05	0.0714,0.12,0.06	0.0714,0.15,0	0.0714,0.15,0.01	0.0714,0.15,0.02	0.0714,0.15,0.03	0.0714,0.15,0.04	0.0714,0.15,0.05	0.0714,0.15,0.06	0.0714,0.18,0	0.0714,0.18,0.01	0.0714,0.18,0.02	0.0714,0.18,0.03	0.0714,0.18,0.04	0.0714,0.18,0.05
mean_income_b10	array	0.0714,0,0	0.0714,0,0.01	0.0714,0,0.02	0.0714,0,0.03	0.0714,0,0.04	0.0714,0,0.05	0.0714,0,0.06	0.0714,0.03,0	0.0714,0.03,0.01	0.0714,0.03,0.02	0.0714,0.03,0.03	0.0714,0.03,0.04	0.0714,0.03,0.05	0.0714,0.03,0.06	0.0714,0.06,0	0.0714,0.06,0.01	0.0714,0.06,0.02	0.0714,0.06,0.03	0.0714,0.06,0.04	0.0714,0.06,0.05	0.0714,0.06,0.06	0.0714,0.09,0	0.0714,0.09,0.01	0.0714,0.09,0.02	0.0714,0.09,0.03	0.0714,0.09,0.04	0.0714,0.09,0.05	0.0714,0.09,0.06	0.0714,0.12,0	0.0714,0.12,0.01	0.0714,0.12,0.02	0.0714,0.12,0.03	0.0714,0.12,0.04	0.0714,0.12,0.05	0.0714,0.12,0.06	0.0714,0.15,0	0.0714,0.15,0.01	0.0714,0.15,0.02	0.0714,0.15,0.03	0.0714,0.15,0.04	0.0714,0.15,0.05	0.0714,0.15,0.06	0.0714,0.18,0	0.0714,0.18,0.01	0.0714,0.18,0.02	0.0714,0.18,0.03	0.0714,0.18,0.04	0.0714,0.18,0.05
mean_income_b02	default	0
mean_income_b20	default	0
mean_income_b11	default	0
sd_income_b00	default	0.25
sd_income_b01	default	0
sd_income_b10	default	0
sd_income_b02	default	0
sd_income_b20	default	0
sd_income_b11	default	0
mean_disease_b00	array	0.75,0,0	0.75,0,0.05	0.75,0,0.1	0.75,0,0.15	0.75,0,0.2	0.75,0,0.25	0.75,0,0.3	0.75,0.05,0	0.75,0.05,0.05	0.75,0.05,0.1	0.75,0.05,0.15	0.75,0.05,0.2	0.75,0.05,0.25	0.75,0.05,0.3	0.75,0.1,0	0.75,0.1,0.05	0.75,0.1,0.1	0.75,0.1,0.15	0.75,0.1,0.2	0.75,0.1,0.25	0.75,0.1,0.3	0.75,0.15,0	0.75,0.15,0.05	0.75,0.15,0.1	0.75,0.15,0.15	0.75,0.15,0.2	0.75,0.15,0.25	0.75,0.15,0.3	0.75,0.2,0	0.75,0.2,0.05	0.75,0.2,0.1	0.75,0.2,0.15	0.75,0.2,0.2	0.75,0.2,0.25	0.75,0.2,0.3	0.75,0.25,0	0.75,0.25,0.05	0.75,0.25,0.1	0.75,0.25,0.15	0.75,0.25,0.2	0.75,0.25,0.25	0.75,0.25,0.3	0.75,0.3,0	0.75,0.3,0.05	0.75,0.3,0.1	0.75,0.3,0.15	0.75,0.3,0.2	0.75,0.3,0.25
mean_disease_b01	array	-0.0714,0,0	-0.0714,0,0.01	-0.0714,0,0.02	-0.0714,0,0.03	-0.0714,0,0.04	-0.0714,0,0.05	-0.0714,0,0.06	-0.0714,0.03,0	-0.0714,0.03,0.01	-0.0714,0.03,0.02	-0.0714,0.03,0.03	-0.0714,0.03,0.04	-0.0714,0.03,0.05	-0.0714,0.03,0.06	-0.0714,0.06,0	-0.0714,0.06,0.01	-0.0714,0.06,0.02	-0.0714,0.06,0.03	-0.0714,0.06,0.04	-0.0714,0.06,0.05	-0.0714,0.06,0.06	-0.0714,0.09,0	-0.0714,0.09,0.01	-0.0714,0.09,0.02	-0.0714,0.09,0.03	-0.0714,0.09,0.04	-0.0714,0.09,0.05	-0.0714,0.09,0.06	-0.0714,0.12,0	-0.0714,0.12,0.01	-0.0714,0.12,0.02	-0.0714,0.12,0.03	-0.0714,0.12,0.04	-0.0714,0.12,0.05	-0.0714,0.12,0.06	-0.0714,0.15,0	-0.0714,0.15,0.01	-0.0714,0.15,0.02	-0.0714,0.15,0.03	-0.0714,0.15,0.04	-0.0714,0.15,0.05	-0.0714,0.15,0.06	-0.0714,0.18,0	-0.0714,0.18,0.01	-0.0714,0.18,0.02	-0.0714,0.18,0.03	-0.0714,0.18,0.04	-0.0714,0.18,0.05
mean_disease_b10	array	-0.0714,0,0	-0.0714,0,0.01	-0.0714,0,0.02	-0.0714,0,0.03	-0.0714,0,0.04	-0.0714,0,0.05	-0.0714,0,0.06	-0.0714,0.03,0	-0.0714,0.03,0.01	-0.0714,0.03,0.02	-0.0714,0.03,0.03	-0.0714,0.03,0.04	-0.0714,0.03,0.05	-0.0714,0.03,0.06	-0.0714,0.06,0	-0.0714,0.06,0.01	-0.0714,0.06,0.02	-0.0714,0.06,0.03	-0.0714,0.06,0.04	-0.0714,0.06,0.05	-0.0714,0.06,0.06	-0.0714,0.09,0	-0.0714,0.09,0.01	-0.0714,0.09,0.02	-0.0714,0.09,0.03	-0.0714,0.09,0.04	-0.0714,0.09,0.05	-0.0714,0.09,0.06	-0.0714,0.12,0	-0.0714,0.12,0.01	-0.0714,0.12,0.02	-0.0714,0.12,0.03	-0.0714,0.12,0.04	-0.0714,0.12,0.05	-0.0714,0.12,0.06	-0.0714,0.15,0	-0.0714,0.15,0.01	-0.0714,0.15,0.02	-0.0714,0.15,0.03	-0.0714,0.15,0.04	-0.0714,0.15,0.05	-0.0714,0.15,0.06	-0.0714,0.18,0	-0.0714,0.18,0.01	-0.0714,0.18,0.02	-0.0714,0.18,0.03	-0.0714,0.18,0.04	-0.0714,0.18,0.05
mean_disease_b02	default	0
mean_disease_b20	default	0
mean_disease_b11	default	0
sd_disease_b00	default	0
sd_disease_b01	default	0
sd_disease_b10	default	0
sd_disease_b02	default	0
sd_disease_b20	default	0
sd_disease_b11	default	0
mean_exposure_b00	array	0.9,0,0	0.9,0,-0.05	0.9,0,-0.1	0.9,0,-0.15	0.9,0,-0.2	0.9,0,-0.25	0.9,0,-0.3	0.9,-0.05,0	0.9,-0.05,-0.05	0.9,-0.05,-0.1	0.9,-0.05,-0.15	0.9,-0.05,-0.2	0.9,-0.05,-0.25	0.9,-0.05,-0.3	0.9,-0.1,0	0.9,-0.1,-0.05	0.9,-0.1,-0.1	0.9,-0.1,-0.15	0.9,-0.1,-0.2	0.9,-0.1,-0.25	0.9,-0.1,-0.3	0.9,-0.15,0	0.9,-0.15,-0.05	0.9,-0.15,-0.1	0.9,-0.15,-0.15	0.9,-0.15,-0.2	0.9,-0.15,-0.25	0.9,-0.15,-0.3	0.9,-0.2,0	0.9,-0.2,-0.05	0.9,-0.2,-0.1	0.9,-0.2,-0.15	0.9,-0.2,-0.2	0.9,-0.2,-0.25	0.9,-0.2,-0.3	0.9,-0.25,0	0.9,-0.25,-0.05	0.9,-0.25,-0.1	0.9,-0.25,-0.15	0.9,-0.25,-0.2	0.9,-0.25,-0.25	0.9,-0.25,-0.3	0.9,-0.3,0	0.9,-0.3,-0.05	0.9,-0.3,-0.1	0.9,-0.3,-0.15	0.9,-0.3,-0.2	0.9,-0.3,-0.25
mean_exposure_b01	array	-0.0714,0,0	-0.0714,0,0.01	-0.0714,0,0.02	-0.0714,0,0.03	-0.0714,0,0.04	-0.0714,0,0.05	-0.0714,0,0.06	-0.0714,0.03,0	-0.0714,0.03,0.01	-0.0714,0.03,0.02	-0.0714,0.03,0.03	-0.0714,0.03,0.04	-0.0714,0.03,0.05	-0.0714,0.03,0.06	-0.0714,0.06,0	-0.0714,0.06,0.01	-0.0714,0.06,0.02	-0.0714,0.06,0.03	-0.0714,0.06,0.04	-0.0714,0.06,0.05	-0.0714,0.06,0.06	-0.0714,0.09,0	-0.0714,0.09,0.01	-0.0714,0.09,0.02	-0.0714,0.09,0.03	-0.0714,0.09,0.04	-0.0714,0.09,0.05	-0.0714,0.09,0.06	-0.0714,0.12,0	-0.0714,0.12,0.01	-0.0714,0.12,0.02	-0.0714,0.12,0.03	-0.0714,0.12,0.04	-0.0714,0.12,0.05	-0.0714,0.12,0.06	-0.0714,0.15,0	-0.0714,0.15,0.01	-0.0714,0.15,0.02	-0.0714,0.15,0.03	-0.0714,0.15,0.04	-0.0714,0.15,0.05	-0.0714,0.15,0.06	-0.0714,0.18,0	-0.0714,0.18,0.01	-0.0714,0.18,0.02	-0.0714,0.18,0.03	-0.0714,0.18,0.04	-0.0714,0.18,0.05
mean_exposure_b10	array	-0.0714,0,0	-0.0714,0,0.01	-0.0714,0,0.02	-0.0714,0,0.03	-0.0714,0,0.04	-0.0714,0,0.05	-0.0714,0,0.06	-0.0714,0.03,0	-0.0714,0.03,0.01	-0.0714,0.03,0.02	-0.0714,0.03,0.03	-0.0714,0.03,0.04	-0.0714,0.03,0.05	-0.0714,0.03,0.06	-0.0714,0.06,0	-0.0714,0.06,0.01	-0.0714,0.06,0.02	-0.0714,0.06,0.03	-0.0714,0.06,0.04	-0.0714,0.06,0.05	-0.0714,0.06,0.06	-0.0714,0.09,0	-0.0714,0.09,0.01	-0.0714,0.09,0.02	-0.0714,0.09,0.03	-0.0714,0.09,0.04	-0.0714,0.09,0.05	-0.0714,0.09,0.06	-0.0714,0.12,0	-0.0714,0.12,0.01	-0.0714,0.12,0.02	-0.0714,0.12,0.03	-0.0714,0.12,0.04	-0.0714,0.12,0.05	-0.0714,0.12,0.06	-0.0714,0.15,0	-0.0714,0.15,0.01	-0.0714,0.15,0.02	-0.0714,0.15,0.03	-0.0714,0.15,0.04	-0.0714,0.15,0.05	-0.0714,0.15,0.06	-0.0714,0.18,0	-0.0714,0.18,0.01	-0.0714,0.18,0.02	-0.0714,0.18,0.03	-0.0714,0.18,0.04	-0.0714,0.18,0.05
mean_exposure_b02	default	0
mean_exposure_b20	default	0
mean_exposure_b11	default	0
sd_exposure_b00	default	0
sd_exposure_b01	default	0
sd_exposure_b10	default	0
sd_exposure_b02	default	0
sd_exposure_b20	default	0
sd_exposure_b11	default	0
dweight_population	default	0
dweight_income	range	0	1	0.02
dweight_risk	range	0	1	0.02
dweight_age	range	0	1	0.02
dweight_sex	default	0
dweight_pocket	custom	1
[truncated: 2 more columns]

## Sheet: populations
population	target_prevalence	popdens_mx	popdens_my	mean_household_pop	disease_pockets	pocket_kernel_type	pocket_scaling	mean_income_b00	mean_income_b01	mean_income_b10	mean_disease_b00	mean_disease_b01	mean_disease_b10	mean_exposure_b00	mean_exposure_b01	mean_exposure_b10	dweight_income	dweight_risk	dweight_age	Lower-left	Upper-right	Prob-ratio
1	0.388	0.82	0.3	5	2	gaussian	1.61	0.75,0.3,0.2	0.0714,0.09,0.05	0.0714,0.06,0.05	0.75,0.3,0	-0.0714,0.18,0	-0.0714,0.09,0.05	0.9,-0.25,-0.05	-0.0714,0.15,0.04	-0.0714,0.06,0.05	0.18	0.2	0.32	0.37451	0.160031	2.34023
2	0.492	0.96	0.7	3.68	5	inverse_square	0.86	0.75,0.15,0.1	0.0714,0.15,0.02	0.0714,0.09,0.06	0.75,0.15,0.15	-0.0714,0.12,0.05	-0.0714,0.09,0.02	0.9,-0.1,-0.1	-0.0714,0.03,0.06	-0.0714,0.06,0.04	0.52	0.58	0.56	0.588023	0.106606	5.51585
3	0.22	0.26	0.62	4.04	4	inverse_square	1.46	0.75,0.05,0.2	0.0714,0.06,0.03	0.0714,0.18,0	0.75,0,0.1	-0.0714,0.09,0	-0.0714,0.12,0	0.9,0,-0.2	-0.0714,0.09,0.03	-0.0714,0.18,0.05	0.64	0.18	0.06	0.258472	0.0486583	5.31198
4	0.26	0.7	0.14	4.64	4	exponential	1.82	0.75,0.25,0.3	0.0714,0.15,0.04	0.0714,0,0.06	0.75,0.05,0.05	-0.0714,0.18,0.06	-0.0714,0.06,0.03	0.9,-0.3,-0.15	-0.0714,0.03,0	-0.0714,0.12,0.04	0.7	0.16	1	0.148517	0.0268027	5.54112
5	0.156	0.36	0.4	3.08	1	gaussian	1.37	0.75,0.15,0.3	0.0714,0,0.02	0.0714,0.06,0.01	0.75,0,0.3	-0.0714,0.03,0.02	-0.0714,0.06,0	0.9,0,-0.05	-0.0714,0,0.02	-0.0714,0.12,0.02	0.1	0.46	0.34	0.118438	0.0268467	4.41164
6	0.308	0.18	0.98	3.2	7	gaussian	1.73	0.75,0.3,0.05	0.0714,0.03,0.03	0.0714,0,0.05	0.75,0.1,0	-0.0714,0.03,0.06	-0.0714,0.15,0.02	0.9,-0.2,-0.1	-0.0714,0,0.06	-0.0714,0.09,0.06	0.04	0.8	0.22	0.365776	0.0561312	6.51645
7	0.116	0.94	0.12	4.1	2	inverse_square	0.56	0.75,0.2,0.1	0.0714,0,0.03	0.0714,0,0.01	0.75,0.05,0.15	-0.0714,0.09,0.03	-0.0714,0.03,0	0.9,-0.2,-0.15	-0.0714,0.15,0.03	-0.0714,0.09,0.04	0.62	0.54	0.3	0.153505	0.00553644	27.7263
8	0.3	0.32	0.24	2.78	10	gaussian	1.49	0.75,0.2,0.15	0.0714,0.15,0.01	0.0714,0.18,0.05	0.75,0.05,0.3	-0.0714,0.18,0.04	-0.0714,0.15,0.04	0.9,-0.1,-0.25	-0.0714,0.12,0.01	-0.0714,0.18,0.01	0.34	0.82	0.2	0.390039	0.0483079	8.07402
9	0.196	0.48	0.38	4.7	1	inverse_square	1.76	0.75,0.05,0.3	0.0714,0.18,0	0.0714,0.03,0.06	0.75,0.15,0.2	-0.0714,0.18,0.06	-0.0714,0.09,0	0.9,-0.15,-0.25	-0.0714,0.18,0.03	-0.0714,0.03,0	0.24	0.9	0.96	0.221592	0.0187403	11.8244
10	0.204	0.16	0.72	4.34	10	gaussian	0.95	0.75,0.05,0.25	0.0714,0.03,0.04	0.0714,0.03,0.04	0.75,0.3,0.1	-0.0714,0.06,0.01	-0.0714,0.15,0	0.9,-0.05,-0.15	-0.0714,0.09,0	-0.0714,0.18,0.03	0.4	0.44	0.12	0.230486	0.0325737	7.07583
11	0.38	0.02	0.16	4.88	8	exponential	2	0.75,0,0.15	0.0714,0.15,0.05	0.0714,0.18,0.03	0.75,0.2,0	-0.0714,0.12,0.02	-0.0714,0.18,0.01	0.9,-0.15,-0.15	-0.0714,0.18,0.04	-0.0714,0.18,0.02	0.78	0.5	0.64	0.325132	0.0244293	13.3091
12	0.292	0.22	0.96	4.22	0	gaussian	1.58	0.75,0.1,0.15	0.0714,0.09,0.04	0.0714,0.12,0.04	0.75,0.15,0.3	-0.0714,0,0.01	-0.0714,0.03,0.01	0.9,0,0	-0.0714,0.03,0.02	-0.0714,0.12,0.05	0.2	0.26	0.02	0.365655	0.096576	3.78619
13	0.46	0.2	0.52	3.74	8	inverse_square	0.62	0.75,0.15,0.25	0.0714,0.18,0.05	0.0714,0.12,0.03	0.75,0.15,0	-0.0714,0.18,0.05	-0.0714,0.18,0.05	0.9,-0.15,-0.05	-0.0714,0.18,0.06	-0.0714,0.18,0.06	0.76	0.42	0.86	0.496028	0.0816511	6.07497
14	0.148	0.04	0.92	3.26	9	exponential	0.59	0.75,0.25,0.05	0.0714,0,0.06	0.0714,0.15,0.06	0.75,0.25,0	-0.0714,0.09,0.02	-0.0714,0.09,0.01	0.9,-0.25,-0.15	-0.0714,0.06,0	-0.0714,0,0.04	0.92	0.04	0.66	0.0790657	0.0168656	4.68799
15	0.212	0.14	0.06	2.3	0	gaussian	1.25	0.75,0.1,0.25	0.0714,0.18,0.06	0.0714,0.12,0.06	0.75,0.05,0.2	-0.0714,0.09,0.04	-0.0714,0.12,0.04	0.9,-0.05,-0.25	-0.0714,0.06,0.05	-0.0714,0.09,0.01	0.98	0.72	0.48	0.291422	0.00844838	34.4944
16	0.428	0.08	0.58	2.9	8	exponential	0.77	0.75,0.2,0.3	0.0714,0.12,0.06	0.0714,0.15,0.01	0.75,0.1,0.1	-0.0714,0,0	-0.0714,0.18,0.06	0.9,-0.15,-0.3	-0.0714,0.18,0.01	-0.0714,0.03,0.02	0.38	0.12	0.7	0.257664	0.101268	2.54438
17	0.42	0.12	0.56	2.42	0	gaussian	1.31	0.75,0,0.3	0.0714,0.09,0.03	0.0714,0.12,0.01	0.75,0.2,0.2	-0.0714,0.15,0.02	-0.0714,0,0	0.9,-0.1,-0.2	-0.0714,0.12,0.04	-0.0714,0.15,0.05	0.56	0.34	0.62	0.429289	0.0498662	8.60882
18	0.164	0.5	0.48	4.94	7	exponential	1.64	0.75,0.2,0.25	0.0714,0.12,0.03	0.0714,0.03,0	0.75,0.1,0.25	-0.0714,0.15,0	-0.0714,0,0.03	0.9,-0.05,-0.05	-0.0714,0.12,0.05	-0.0714,0.18,0.04	0.54	0.38	0.36	0.117354	0.00828172	14.1702
19	0.332	0.42	0.08	3.14	9	inverse_square	0.71	0.75,0.3,0.3	0.0714,0.12,0	0.0714,0.06,0.06	0.75,0.2,0.3	-0.0714,0.12,0.03	-0.0714,0,0.06	0.9,-0.05,-0.1	-0.0714,0.12,0.03	-0.0714,0.06,0.02	0.06	0.48	0.04	0.414781	0.120246	3.44944
20	0.468	0.68	0.88	4.4	6	inverse_square	1.4	0.75,0.2,0.05	0.0714,0.09,0.02	0.0714,0.18,0.06	0.75,0,0.25	-0.0714,0.06,0.02	-0.0714,0.15,0.06	0.9,-0.3,-0.3	-0.0714,0.09,0.02	-0.0714,0.12,0.06	0.28	0.86	0.76	0.549263	0.092215	5.95633
21	0.188	0.88	1	2.84	4	exponential	1.94	0.75,0.15,0.15	0.0714,0.03,0.01	0.0714,0.06,0.02	0.75,0.25,0.3	-0.0714,0.18,0.02	-0.0714,0.06,0.01	0.9,-0.2,-0.3	-0.0714,0.03,0.04	-0.0714,0.12,0.03	0.3	0.7	0.24	0.170651	0.0116071	14.7023
22	0.108	0.78	0.54	3.44	7	exponential	1.55	0.75,0.15,0.2	0.0714,0.06,0.05	0.0714,0.12,0.02	0.75,0.2,0.1	-0.0714,0.15,0.06	-0.0714,0,0.02	0.9,-0.25,-0.3	-0.0714,0.12,0.02	-0.0714,0,0	0.82	0.92	0.4	0.172818	0.00148202	116.61
23	0.404	0.9	0.64	4.76	7	exponential	0.65	0.75,0.1,0.3	0.0714,0.18,0.01	0.0714,0.03,0.01	0.75,0.15,0.25	-0.0714,0.15,0.03	-0.0714,0,0.04	0.9,-0.3,-0.05	-0.0714,0.09,0.06	-0.0714,0.15,0.01	0.36	0.76	0.82	0.499423	0.0561484	8.8947
24	0.18	0.1	0.94	2.24	3	exponential	1.43	0.75,0.1,0	0.0714,0.12,0.01	0.0714,0.12,0.05	0.75,0,0.05	-0.0714,0,0.05	-0.0714,0.06,0.06	0.9,-0.3,-0.3	-0.0714,0,0.01	-0.0714,0.09,0.02	0.46	0.32	0.98	0.0478385	0.00512755	9.3297
25	0.172	0.56	0.84	2.72	6	gaussian	0.98	0.75,0.25,0	0.0714,0.15,0.06	0.0714,0.18,0.06	0.75,0.25,0.15	-0.0714,0.12,0.01	-0.0714,0.18,0.04	0.9,-0.2,0	-0.0714,0.03,0.05	-0.0714,0.12,0	0.48	0.56	0.88	0.0955154	0.0101407	9.41901
26	0.324	0.86	0.76	3.38	1	inverse_square	1.91	0.75,0.1,0.05	0.0714,0.18,0.03	0.0714,0.18,0.02	0.75,0.3,0.15	-0.0714,0.12,0	-0.0714,0.12,0.01	0.9,-0.25,-0.2	-0.0714,0.18,0.05	-0.0714,0,0.03	0.74	0.24	0.74	0.297603	0.05552	5.36028
27	0.244	0.4	0.5	3.32	3	inverse_square	1.19	0.75,0,0.2	0.0714,0.03,0	0.0714,0.15,0.03	0.75,0.25,0.25	-0.0714,0.12,0.06	-0.0714,0.09,0.03	0.9,0,-0.3	-0.0714,0.15,0	-0.0714,0.18,0	0.26	0.62	0.9	0.190196	0.0264439	7.19243
28	0.348	0.98	0.1	2.12	9	inverse_square	0.89	0.75,0.1,0.1	0.0714,0.03,0.06	0.0714,0.03,0.05	0.75,0.2,0.25	-0.0714,0.15,0.04	-0.0714,0.12,0.03	0.9,-0.1,-0.3	-0.0714,0.15,0.02	-0.0714,0,0.06	0.94	0.52	0.44	0.474004	0.0373834	12.6795
29	0.34	0.54	0.02	4.28	9	gaussian	0.8	0.75,0.3,0.3	0.0714,0.18,0.02	0.0714,0,0.03	0.75,0.1,0.15	-0.0714,0,0.02	-0.0714,0.09,0.06	0.9,-0.05,-0.2	-0.0714,0.12,0.06	-0.0714,0.09,0.03	0.6	0.78	0.8	0.530629	0.0298879	17.754
30	0.132	0.34	0.78	2.36	6	gaussian	1.22	0.75,0.25,0.15	0.0714,0.03,0.05	0.0714,0.15,0.05	0.75,0.15,0.1	-0.0714,0.06,0	-0.0714,0.18,0.06	0.9,-0.1,-0.05	-0.0714,0,0	-0.0714,0.06,0.03	0.42	0.64	0.46	0.0866637	0.00767234	11.2956
31	0.476	0.76	0.36	3.56	9	exponential	1.34	0.75,0.2,0	0.0714,0.15,0	0.0714,0.06,0	0.75,0.05,0	-0.0714,0.03,0	-0.0714,0.03,0.03	0.9,-0.1,-0.15	-0.0714,0.15,0.05	-0.0714,0.03,0.06	0.58	0.66	0.14	0.73303	0.0617797	11.8652
32	0.276	0.44	0.04	3.92	4	inverse_square	1.88	0.75,0.3,0.15	0.0714,0,0.04	0.0714,0.09,0.04	0.75,0.1,0.3	-0.0714,0.18,0.03	-0.0714,0.12,0.05	0.9,-0.15,-0.1	-0.0714,0.06,0.01	-0.0714,0.06,0	0.32	0.98	0.78	0.388378	0.0500543	7.75913
33	0.364	0.72	0.46	2.06	10	gaussian	1.85	0.75,0.25,0.25	0.0714,0.06,0	0.0714,0.09,0.02	0.75,0.1,0.2	-0.0714,0.03,0.04	-0.0714,0.18,0.03	0.9,-0.3,-0.25	-0.0714,0.18,0.06	-0.0714,0.09,0	0.08	0.02	0.38	0.112471	0.0933387	1.20498
34	0.444	0.58	0.66	3.02	5	gaussian	0.83	0.75,0.25,0.1	0.0714,0.18,0.04	0.0714,0.03,0.03	0.75,0,0.2	-0.0714,0.06,0.05	-0.0714,0.15,0.05	0.9,0,-0.25	-0.0714,0.03,0.01	-0.0714,0.15,0.03	0.86	0.08	0.92	0.335707	0.081132	4.13779
35	0.284	0.74	0.86	2.18	8	inverse_square	1.67	0.75,0.3,0	0.0714,0,0	0.0714,0.15,0	0.75,0.3,0.3	-0.0714,0.15,0.01	-0.0714,0.09,0.04	0.9,-0.15,-0.2	-0.0714,0.18,0	-0.0714,0.18,0.06	0.72	0.22	0.84	0.141767	0.0166876	8.49535
36	0.14	0.38	0.22	3.98	5	gaussian	1.07	0.75,0.1,0.2	0.0714,0.12,0.04	0.0714,0,0.04	0.75,0.25,0.1	-0.0714,0,0.04	-0.0714,0.18,0.02	0.9,-0.3,0	-0.0714,0.06,0.03	-0.0714,0,0.01	0.5	0.74	0.18	0.210856	0.0154656	13.6339
37	0.372	0.66	0.9	4.82	3	exponential	1.7	0.75,0.3,0.25	0.0714,0.06,0.02	0.0714,0,0	0.75,0.1,0.05	-0.0714,0.09,0.01	-0.0714,0,0.05	0.9,-0.15,0	-0.0714,0.06,0.04	-0.0714,0.03,0.03	0.44	0.3	0.5	0.357233	0.0593134	6.0228
38	0.228	1	0.74	2.96	2	gaussian	1.28	0.75,0,0.05	0.0714,0.03,0.02	0.0714,0.15,0.04	0.75,0.3,0.2	-0.0714,0.06,0.03	-0.0714,0,0.01	0.9,-0.1,0	-0.0714,0.09,0.01	-0.0714,0.12,0.01	0.22	0.36	0.26	0.179781	0.036797	4.88575
39	0.268	0.84	0.34	4.58	3	inverse_square	1.16	0.75,0.05,0.1	0.0714,0.12,0.02	0.0714,0.15,0.02	0.75,0.3,0.25	-0.0714,0.03,0.01	-0.0714,0.18,0	0.9,-0.2,-0.25	-0.0714,0.18,0.02	-0.0714,0.03,0.04	0.9	0.84	0.16	0.62244	0.0230884	26.959
40	0.452	0.64	0.68	3.62	6	exponential	1.52	0.75,0.15,0.05	0.0714,0,0.01	0.0714,0.09,0	0.75,0,0	-0.0714,0,0.06	-0.0714,0.12,0.02	0.9,-0.25,-0.25	-0.0714,0,0.05	-0.0714,0.15,0.06	0.02	0.1	0.54	0.233397	0.160222	1.45671
41	0.412	0.28	0.32	2.54	10	gaussian	0.53	0.75,0.15,0	0.0714,0.12,0.05	0.0714,0.12,0	0.75,0.05,0.25	-0.0714,0.06,0.06	-0.0714,0.03,0.02	0.9,0,-0.15	-0.0714,0.09,0.04	-0.0714,0.06,0.01	0.88	0.88	0.72	0.676298	0.0197873	34.1784
42	0.436	0.46	0.8	4.46	7	exponential	1.1	0.75,0.2,0.2	0.0714,0.15,0.03	0.0714,0.18,0.01	0.75,0.15,0.05	-0.0714,0.03,0.03	-0.0714,0.03,0.04	0.9,-0.2,-0.05	-0.0714,0.15,0.06	-0.0714,0,0.05	1	0.68	0.58	0.744433	0.0419269	17.7555
43	0.236	0.6	0.42	3.5	0	inverse_square	1.79	0.75,0.3,0.1	0.0714,0.06,0.06	0.0714,0.09,0.01	0.75,0.3,0.05	-0.0714,0.03,0.05	-0.0714,0.12,0.06	0.9,-0.2,-0.2	-0.0714,0.15,0.01	-0.0714,0.15,0	0.66	0.28	0.28	0.271092	0.0321068	8.44345
44	0.484	0.24	0.6	4.52	5	gaussian	0.92	0.75,0.05,0.05	0.0714,0.09,0	0.0714,0.09,0.05	0.75,0.25,0.05	-0.0714,0.06,0.04	-0.0714,0.03,0.05	0.9,-0.3,-0.1	-0.0714,0.03,0.03	-0.0714,0.15,0.02	0.96	0.6	0.68	0.750922	0.0651483	11.5263
45	0.396	0.92	0.18	4.16	1	exponential	1.13	0.75,0,0.1	0.0714,0.09,0.01	0.0714,0.06,0.04	0.75,0,0.15	-0.0714,0.09,0.05	-0.0714,0.06,0.02	0.9,-0.05,0	-0.0714,0.12,0	-0.0714,0.03,0.05	0.84	0.14	0.42	0.489676	0.0788143	6.21303
46	0.252	0.06	0.26	2.66	3	inverse_square	1.97	0.75,0.05,0.15	0.0714,0.09,0.06	0.0714,0.06,0.03	0.75,0.25,0.2	-0.0714,0,0.03	-0.0714,0.06,0.05	0.9,-0.25,0	-0.0714,0.06,0.06	-0.0714,0.03,0.01	0.8	0.94	0.08	0.6656	0.0181997	36.572
47	0.356	0.62	0.82	3.8	10	exponential	0.68	0.75,0,0.25	0.0714,0.06,0.01	0.0714,0.18,0.04	0.75,0.3,0.3	-0.0714,0.09,0.06	-0.0714,0.15,0.03	0.9,-0.25,-0.1	-0.0714,0,0.04	-0.0714,0,0.02	0.68	0.96	0.94	0.467993	0.022031	21.2425
48	0.316	0.8	0.2	2.48	2	inverse_square	1.01	0.75,0.05,0	0.0714,0.18,0.06	0.0714,0,0.02	0.75,0.2,0.15	-0.0714,0.12,0.04	-0.0714,0.15,0.01	0.9,0,-0.1	-0.0714,0.06,0.02	-0.0714,0.15,0.04	0.12	0.06	0.1	0.235337	0.152446	1.54374
49	0.124	0.52	0.44	3.86	1	exponential	0.74	0.75,0,0	0.0714,0.06,0.04	0.0714,0.09,0.03	0.75,0.05,0.1	-0.0714,0.18,0.01	-0.0714,0.03,0.06	0.9,-0.05,-0.3	-0.0714,0,0.03	-0.0714,0.09,0.05	0.16	1	0.52	0.145958	0.0103091	14.1582
50	0.5	0.3	0.28	2.6	5	inverse_square	1.04	0.75,0.25,0.2	0.0714,0,0.05	0.0714,0.03,0.02	0.75,0.2,0.05	-0.0714,0.15,0.05	-0.0714,0.06,0.04	0.9,-0.3,-0.2	-0.0714,0.09,0.05	-0.0714,0.06,0.06	0.14	0.4	0.6	0.454963	0.142483	3.1931
vanilla-1	0.5	0	0	2.3	0	n/a	n/a	0	0	0	0	0	0	0.5	0	0	0	1	0	0.5	0.5	1
vanilla-2	0.2	0	0	2.3	0	n/a	n/a	0	0	0	0	0	0	0.5	0	0	0	1	0	0.2	0.2	1
vanilla-3	0.3	0	0	2.3	0	n/a	n/a	0	0	0	0	0	0	0.5	0	0	0	1	0	0.3	0.3	1

## Sheet: RR=1
	Means of Ratios								Means of Ratios of Sqrts
	Prevalence			RR					Prevalence			RR
	n=7	n=15	n=30	n=7	n=15	n=30			n=7	n=15	n=30	n=7	n=15	n=30
NewEPI	1.39161	1.97883	2.90721	1.23453	1.73596	2.49791		enum	1.18406	1.41233	1.62466	1.07664	1.31089	1.44453
Grid	1.61392	2.3824	3.69876	2.94269	2.14831	2.89166		grid_epi	1.2768	1.54915	1.91911	1.34572	1.45808	1.67543
Peri	1.46766	2.128	3.24528	3.19577	1.49913	2.04992		peri_epi	1.19488	1.42875	1.73545	1.24712	1.20245	1.35215
Quad	1.58513	2.23204	3.46854	4.41666	1.13915	1.38077		qtr_epi	1.23468	1.43459	1.74697	1.32582	1.05384	1.16236
Square	1.03104	1.0743	1.14512	3.53688	1.01768	0.990463		square_gps	1.01465	1.03819	1.07045	1.21643	1.00486	0.992342
OldEPI	1.99319	3.13145	4.98483	4.83372	1.8478	2.49471		strip_epi-s1	1.393	1.72603	2.14861	1.48796	1.34163	1.5523
EPI3	1.9203	2.82012	4.21695	1.32486	1.67376	2.14294		strip_epi-s3	1.36768	1.63726	1.96898	1.12624	1.28356	1.44201
EPI5	1.80961	2.5937	3.71491	4.81088	1.62722	1.94755		strip_epi-s5	1.32653	1.56947	1.85344	1.45384	1.269	1.38267
	Prevalence												RR
	n=7				n=15				n=30				n=7				n=15				n=30
	mean	min	max	stdev	mean	min	max	stdev	mean	min	max	stdev	mean	min	max	stdev	mean	min	max	stdev	mean	min	max	stdev
NewEPI	1.39161	0.997352	1.99182	0.259606	1.97883	0.970771	3.38608	0.623778	2.90721	0	6.24542	1.59804	1.23453	0.000304194	2.603	0.45296	1.73596	0.836714	5.83429	0.797442	2.49791	0	21.0968	2.92575
Grid	1.61392	0.956495	2.91237	0.386611	2.3824	0.951483	4.94403	0.860264	3.69876	0.93888	10.0166	1.75899	2.94269	8.70195e-06	76.6692	10.3509	2.14831	0.665321	5.91832	0.983872	2.89166	0.760176	10.218	1.71844
Peri	1.46766	0.848215	4.72324	0.730242	2.128	0.949321	7.48308	1.37297	3.24528	1.04248	14.0162	2.74524	3.19577	0.448675	108.754	14.7911	1.49913	0.709102	5.28633	0.84317	2.04992	0.59083	21.323	2.78172
Quad	1.58513	0.923582	5.04328	0.936216	2.23204	0.870206	10.0626	1.89015	3.46854	0.976796	18.1526	3.61222	4.41666	0.401654	121.943	18.3531	1.13915	0.572389	2.42296	0.413828	1.38077	0.445422	2.97828	0.557731
Square	1.03104	0.869976	1.17467	0.0725804	1.0743	0.876117	1.40408	0.116676	1.14512	0.926039	1.74005	0.179332	3.53688	0.606028	134.016	18.2691	1.01768	0.724915	2.06663	0.178317	0.990463	0.66442	1.20951	0.101803
OldEPI	1.99319	0.976083	5.74104	1.09295	3.13145	1.02496	11.1191	2.19099	4.98483	1.01485	19.3244	4.07876	4.83372	0.0402855	125.867	18.7051	1.8478	0.6771	4.82462	0.921603	2.49471	0.654658	10.9862	1.58243
EPI3	1.9203	0.983484	5.36766	1.016	2.82012	0.999642	9.90999	1.97408	4.21695	1.00301	17.3852	3.58541	1.32486	1.18296e-05	3.55968	0.604916	1.67376	0.647999	3.59757	0.727955	2.14294	0.490598	7.97136	1.2026
EPI5	1.80961	0.944918	5.14897	0.969539	2.5937	0.951345	9.30078	1.82414	3.71491	0.955363	14.1529	3.05267	4.81088	0.0519257	124.66	18.9463	1.62722	0.591248	3.2174	0.655773	1.94755	0.565308	5.27577	0.932278
	Frequency of Rank for n=7 (1 is lowest ratio, 8 is highest ratio)
	Prevalence								RR
rank	1	2	3	4	5	6	7	8	1	2	3	4	5	6	7	8
NewEPI	2	12	8	9	3	10	8	1	4	5	6	7	6	4	11	10
Grid	0	1	7	12	4	2	9	18	1	3	1	3	4	8	13	20
Peri	5	14	15	4	4	3	2	6	12	13	10	6	2	3	3	4
Quad	7	14	10	4	14	1	2	1	20	13	12	1	5	2	0	0
Square	37	9	5	0	1	1	0	0	14	10	6	5	6	4	4	4
OldEPI	0	0	1	4	4	11	15	18	1	2	4	9	10	9	9	9
EPI3	1	1	0	4	18	8	12	9	0	6	5	13	10	10	7	2
EPI5	1	2	7	16	5	17	5	0	1	1	9	9	10	13	6	4
	Frequency of Rank for n=15 (1 is lowest ratio, 8 is highest ratio)
	Prevalence								RR
rank	1	2	3	4	5	6	7	8	1	2	3	4	5	6	7	8
NewEPI	0	15	9	6	6	8	6	3	0	4	7	7	6	8	13	8
Grid	0	0	6	9	6	4	10	18	0	1	2	3	3	5	14	25
Peri	1	12	15	10	2	4	3	6	3	11	16	4	9	2	3	5
Quad	5	20	9	5	8	4	1	1	16	24	9	2	0	0	1	1
Square	46	4	3	0	0	0	0	0	29	9	5	3	0	4	2	1
OldEPI	0	0	1	0	2	11	17	22	1	2	3	4	11	11	16	5
EPI3	0	0	1	8	17	9	15	3	2	0	6	17	11	10	2	5
EPI5	1	2	9	15	12	13	1	0	2	2	5	13	13	13	2	3
	Frequency of Rank for n=30 (1 is lowest ratio, 8 is highest ratio)
	Prevalence								RR
rank	1	2	3	4	5	6	7	8	1	2	3	4	5	6	7	8
NewEPI	5	10	5	4	5	10	11	3	6	2	3	6	6	3	14	13
Grid	2	1	6	8	4	1	9	22	0	0	2	1	4	2	14	30
Peri	0	9	21	8	4	5	2	4	2	5	21	8	9	4	2	2
Quad	2	21	6	6	7	7	3	1	8	33	7	3	1	1	0	0
Square	44	6	1	0	2	0	0	0	34	9	4	2	1	0	3	0
OldEPI	0	0	1	1	1	13	15	22	0	0	1	2	6	25	13	6
EPI3	0	0	3	8	21	8	12	1	2	3	1	13	17	11	5	1
EPI5	0	6	10	18	9	9	1	0	1	1	14	18	9	7	2	1
																																	6	10	13	17	20	24
			population 1
	true	true	7							15							30
	mean	rr	mean	stdev	mse	mrr	srr	prr	mse_rr	mean	stdev	mse	mrr	srr	prr	mse_rr	mean	stdev	mse	mrr	srr	prr	mse_rr
Random	0.286905	1.04627	0.291409	0.0367087	0.00136781	1.01435	0.264879	0.971791	0.075708	0.289812	0.0262473	0.000697371	1.01312	0.19014	0.990204	0.0392966	0.289771	0.0177855	0.000324538	0.995863	0.122473	0.986376	0.0185869
NewEPI	0.286905	1.04627	0.292593	0.0423177	0.00182314	1.04355	0.285634	1.00099	0.0836371	0.294209	0.0383987	0.00152781	1.03498	0.230929	1.00755	0.0548274	0.292083	0.0343002	0.00120332	1.01894	0.194287	1.0016	0.0397428			1.33289	1.10473	2.19081	1.39522	3.70778	2.13822	65	6	3	7	5	7	5		1.15451	1.05106	1.48014	1.18119	1.92556	1.46226
Grid	0.286905	1.04627	0.297192	0.0464009	0.00225887	1.03894	0.313807	0.981456	0.102676	0.296376	0.0408571	0.001759	1.01474	0.240838	0.977951	0.0626704	0.299588	0.0383503	0.0016316	0.984493	0.196782	0.96108	0.0459805			1.65144	1.35621	2.52233	1.5948	5.02747	2.47381	65	8	7	8	7	8	7		1.28508	1.16456	1.58819	1.26286	2.2422	1.57283
Peri	0.286905	1.04627	0.292095	0.0357484	0.00130488	1.07816	0.314904	1.01931	0.0998914	0.29388	0.0305975	0.000984858	1.02436	0.217019	0.992779	0.0499585	0.290875	0.027101	0.000750225	0.977352	0.165123	0.957973	0.035062			0.953992	1.31943	1.41224	1.27132	2.31167	1.88638	65	1	6	3	3	3	3		0.976725	1.14866	1.18838	1.12753	1.52042	1.37345
Quad	0.286905	1.04627	0.290994	0.0360709	0.00131783	0.989668	0.243452	0.952564	0.0680497	0.291233	0.026734	0.000733438	0.975625	0.179707	0.954205	0.0407706	0.290021	0.022706	0.000525272	0.955992	0.140239	0.942104	0.0305175			0.963456	0.898844	1.05172	1.03751	1.61852	1.64188	65	2	1	1	2	2	2		0.981558	0.948074	1.02553	1.01858	1.27221	1.28136
Square	0.286905	1.04627	0.292553	0.0369505	0.00139724	1.03597	0.261642	0.997541	0.0708311	0.293031	0.0265993	0.00074505	1.00764	0.174446	0.988451	0.0337744	0.293723	0.0188349	0.000401239	0.997762	0.124815	0.987686	0.0190109			1.02151	0.935582	1.06837	0.859475	1.23634	1.02281	65	3	2	2	1	1	1		1.0107	0.967255	1.03362	0.927079	1.11191	1.01134
OldEPI	0.286905	1.04627	0.288546	0.044102	0.00194768	1.00261	0.322595	0.94045	0.115265	0.289596	0.0383113	0.001475	0.976793	0.246578	0.935682	0.0730304	0.29112	0.0333209	0.00112805	0.94897	0.188519	0.925764	0.0500611			1.42394	1.5225	2.11508	1.85844	3.47586	2.69335	65	7	8	6	8	6	8		1.19329	1.2339	1.45433	1.36325	1.86437	1.64114
EPI3	0.286905	1.04627	0.285524	0.0420617	0.00177109	1.01871	0.288843	0.968065	0.0895463	0.286376	0.0358127	0.00128283	0.967541	0.207911	0.941639	0.0541746	0.290356	0.0303234	0.000931418	0.947872	0.166545	0.93342	0.0404724			1.29483	1.18279	1.83952	1.37861	2.86998	2.17746	65	5	5	5	4	4	6		1.13791	1.08756	1.35629	1.17414	1.6941	1.47562
EPI5	0.286905	1.04627	0.294182	0.0406141	0.00170246	0.964085	0.269967	0.920278	0.0887562	0.294161	0.0343114	0.00122992	0.946834	0.206827	0.922801	0.058022	0.293363	0.0298451	0.000932436	0.942387	0.151203	0.932199	0.0358745			1.24466	1.17235	1.76365	1.47651	2.87312	1.9301	65	4	4	4	6	5	4		1.11564	1.08275	1.32803	1.21512	1.69503	1.38928
			population 2
	true	true	7							15							30
	mean	rr	mean	stdev	mse	mrr	srr	prr	mse_rr	mean	stdev	mse	mrr	srr	prr	mse_rr	mean	stdev	mse	mrr	srr	prr	mse_rr
Random	0.35139	1.04585	0.345698	0.0337747	0.00117313	1.09666	0.221442	1.07038	0.0496383	0.34928	0.0226821	0.00051893	1.07921	0.1442	1.06772	0.0212719	0.347052	0.0161415	0.000279366	1.08016	0.106367	1.07403	0.0121081
NewEPI	0.35139	1.04585	0.346109	0.0365989	0.00136737	1.11982	0.247386	1.08968	0.0631209	0.346233	0.0313968	0.00101235	1.09073	0.172766	1.07441	0.0306638	0.346166	0.0269706	0.000754703	1.09313	0.140119	1.08242	0.0209707			1.16557	1.27162	1.95085	1.44151	2.70148	1.73196	78	4	8	8	8	7	7		1.07962	1.12766	1.39673	1.20063	1.64362	1.31604
Grid	0.35139	1.04585	0.348768	0.0375222	0.00141479	1.00833	0.206343	0.984065	0.0463948	0.348111	0.0315995	0.00100928	0.99702	0.158192	0.982175	0.0290792	0.346677	0.0276523	0.000786862	0.997755	0.13251	0.986848	0.0210401			1.206	0.934658	1.94493	1.36702	2.8166	1.7377	78	5	6	7	7	8	8		1.09818	0.966777	1.39461	1.1692	1.67827	1.31822
Peri	0.35139	1.04585	0.367269	0.0347947	0.00146281	1.06756	0.203638	1.04544	0.0414686	0.360808	0.0267068	0.000801952	1.00664	0.143755	0.9944	0.0233126	0.357828	0.0221752	0.000533187	1.01565	0.110055	1.00835	0.0135184			1.24693	0.835416	1.5454	1.09593	1.90856	1.11648	78	7	2	3	4	4	3		1.11666	0.914011	1.24314	1.04687	1.38151	1.05663
Quad	0.35139	1.04585	0.363554	0.0333178	0.00125804	1.00946	0.187362	0.988887	0.0383493	0.366081	0.025387	0.000860325	1.00089	0.13353	0.989666	0.0209869	0.362407	0.0190029	0.000482484	0.992809	0.0977204	0.986894	0.0130251			1.07238	0.772575	1.65788	0.9866	1.72707	1.07574	78	1	1	4	1	2	2		1.03556	0.878963	1.28759	0.993278	1.31418	1.03718
Square	0.35139	1.04585	0.338214	0.0331834	0.00127474	1.0682	0.208692	1.04426	0.0435549	0.339205	0.022945	0.000674947	1.05921	0.145346	1.04747	0.0211281	0.338931	0.0162355	0.000418818	1.0522	0.0996042	1.04646	0.00992137			1.08662	0.877445	1.30065	0.993237	1.49917	0.819403	78	2	4	1	2	1	1		1.04241	0.936721	1.14046	0.996613	1.22441	0.905209
OldEPI	0.35139	1.04585	0.363125	0.0371597	0.00151855	1.00715	0.207099	0.983274	0.0468058	0.362943	0.0292389	0.000988385	0.999319	0.152907	0.98598	0.026965	0.361459	0.0244637	0.000699857	1.00139	0.120946	0.992167	0.0175098			1.29445	0.942937	1.90466	1.26763	2.50516	1.44613	78	8	7	6	6	6	6		1.13774	0.971049	1.38009	1.12589	1.58277	1.20255
EPI3	0.35139	1.04585	0.361715	0.0365283	0.00144092	1.00714	0.20579	0.983124	0.0462841	0.359611	0.02823	0.000864518	1.00933	0.150329	0.995679	0.0251159	0.357818	0.0222695	0.00053725	1.00998	0.115728	1.0019	0.0153246			1.22827	0.932427	1.66596	1.18071	1.9231	1.26565	78	6	5	5	5	5	5		1.10827	0.965623	1.29072	1.0866	1.38676	1.12501
EPI5	0.35139	1.04585	0.360543	0.0353063	0.00133031	1.00547	0.196861	0.984293	0.0425435	0.359095	0.0270211	0.000789507	1.00633	0.14216	0.994536	0.0228426	0.356154	0.0220245	0.000507774	1.01763	0.111015	1.01054	0.0135711			1.13399	0.857071	1.52141	1.07384	1.81759	1.12083	78	3	3	2	3	3	4		1.06489	0.925781	1.23346	1.03626	1.34818	1.05869
			population 3
	true	true	7							15							30
	mean	rr	mean	stdev	mse	mrr	srr	prr	mse_rr	mean	stdev	mse	mrr	srr	prr	mse_rr	mean	stdev	mse	mrr	srr	prr	mse_rr
Random	0.123232	1.01164	0.125097	0.0214097	0.000461853	1.06896	0.454548	0.969924	0.208354	0.125321	0.0154576	0.000243301	1.03501	0.276432	0.991679	0.0768131	0.124859	0.0113001	0.000130339	1.01014	0.188632	0.988428	0.0361208
NewEPI	0.123232	1.01164	0.127982	0.0239222	0.000594834	1.07394	0.528733	0.958758	0.282355	0.127139	0.0166374	0.000292068	1.01467	0.31745	0.958915	0.103554	0.127207	0.0140128	0.000212159	0.999799	0.224035	0.970471	0.0518866			1.28793	1.35517	1.20044	1.34814	1.62774	1.43647	91	6	1	2	2	5	2		1.13487	1.16412	1.09564	1.16109	1.27583	1.19853
Grid	0.123232	1.01164	0.126683	0.0244512	0.00060977	1.27234	0.925033	1.02876	0.855979	0.12671	0.0185147	0.000354891	1.13085	0.422606	1.03244	0.179028	0.126782	0.0146717	0.000227861	1.10905	0.324483	1.04915	0.106696			1.32027	4.10829	1.45865	2.3307	1.74822	2.95387	91	7	8	7	4	7	8		1.14903	2.02689	1.20774	1.52666	1.3222	1.71868
Peri	0.123232	1.01164	0.126533	0.0239321	0.000583642	1.31425	0.891169	1.06889	0.79746	0.126729	0.0180394	0.000337649	1.14008	0.439392	1.04439	0.194138	0.128376	0.0138559	0.000218447	1.04217	0.256975	1.00436	0.0660891			1.2637	3.82743	1.38778	2.52741	1.67598	1.82967	91	5	6	6	5	6	4		1.12414	1.95638	1.17804	1.58978	1.2946	1.35265
Quad	0.123232	1.01164	0.129033	0.0232381	0.000573661	1.31903	0.868412	1.09136	0.760495	0.128619	0.0169474	0.000316234	1.1568	0.413377	1.05893	0.173117	0.128476	0.0123498	0.000180017	1.10433	0.248311	1.06203	0.0641975			1.24208	3.65001	1.29976	2.25374	1.38114	1.7773	91	4	5	3	3	2	3		1.11449	1.9105	1.14007	1.50125	1.17522	1.33315
Square	0.123232	1.01164	0.126498	0.0220396	0.000496411	1.12223	0.536777	1.00627	0.288158	0.126057	0.0159104	0.000261121	1.03649	0.277863	0.99343	0.0775395	0.125958	0.0110989	0.000130616	1.03161	0.203193	1.00815	0.0412996			1.07482	1.38302	1.07324	1.00946	1.00213	1.14337	91	1	2	1	1	1	1		1.03674	1.17602	1.03597	1.00472	1.00106	1.06929
OldEPI	0.123232	1.01164	0.128494	0.0245427	0.000630033	1.28313	0.896506	1.04508	0.804841	0.129012	0.0184164	0.000372572	1.13016	0.484755	1.02263	0.235108	0.12918	0.0139896	0.000231088	1.08877	0.295568	1.03516	0.0879136			1.36414	3.86285	1.53132	3.06078	1.77297	2.43388	91	8	7	8	8	8	6		1.16796	1.96541	1.23747	1.74951	1.33153	1.56009
EPI3	0.123232	1.01164	0.128	0.0230293	0.000553082	1.29994	0.860395	1.04898	0.741674	0.128661	0.0169779	0.000317723	1.15656	0.464655	1.05016	0.217388	0.12797	0.0131515	0.000195411	1.15043	0.308672	1.09502	0.102231			1.19753	3.55968	1.30588	2.83009	1.49924	2.83024	91	2	4	4	7	4	7		1.09432	1.88671	1.14275	1.68229	1.22444	1.68233
EPI5	0.123232	1.01164	0.128045	0.0232777	0.000565016	1.23151	0.676241	1.05575	0.459248	0.128211	0.0174096	0.000327884	1.17541	0.435103	1.08732	0.195042	0.128006	0.0129323	0.000190035	1.14984	0.268706	1.11057	0.0819901			1.22337	2.20417	1.34765	2.53918	1.458	2.26988	91	3	3	5	6	3	5		1.10606	1.48464	1.16088	1.59348	1.20748	1.50661
			population 4
	true	true	7							15							30
	mean	rr	mean	stdev	mse	mrr	srr	prr	mse_rr	mean	stdev	mse	mrr	srr	prr	mse_rr	mean	stdev	mse	mrr	srr	prr	mse_rr
Random	0.117669	1.09511	0.117991	0.0244507	0.00059794	1.32716	0.582493	1.21216	0.352999	0.118745	0.0176808	0.000313768	1.24178	0.336622	1.19634	0.123562	0.119234	0.0125345	0.000159563	1.24805	0.23917	1.22396	0.0738046
NewEPI	0.117669	1.09511	0.121801	0.0285731	0.000833495	1.35128	0.644454	1.2197	0.430844	0.120034	0.0247274	0.000617038	1.29789	0.435015	1.23071	0.207625	0.121866	0.0223998	0.000519366	1.25383	0.323499	1.21613	0.119297			1.39394	1.22052	1.96654	1.68034	3.25493	1.6164	104	3	7	3	7	3	7		1.18065	1.10477	1.40233	1.29628	1.80414	1.27138
Grid	0.117669	1.09511	0.124311	0.0307439	0.000989303	1.3793	0.64706	1.23683	0.438771	0.124682	0.0272461	0.000791532	1.31333	0.463523	1.22828	0.232588	0.126054	0.0253065	0.000710727	1.25199	0.364612	1.19698	0.143319			1.65452	1.24298	2.52266	1.88236	4.45422	1.94188	104	4	8	5	8	5	8		1.28628	1.11489	1.58829	1.37199	2.1105	1.39351
Peri	0.117669	1.09511	0.131505	0.0248331	0.000808118	1.3033	0.512246	1.19843	0.273071	0.131355	0.0201752	0.000594345	1.19352	0.326253	1.14583	0.109014	0.13125	0.0170587	0.000475443	1.1716	0.228103	1.14416	0.0544369			1.3515	0.773575	1.89422	0.882259	2.97966	0.737581	104	2	1	2	2	2	1		1.16254	0.879531	1.37631	0.939286	1.72617	0.858825
Quad	0.117669	1.09511	0.138972	0.0245416	0.00105611	1.33123	0.544896	1.22844	0.314689	0.137379	0.0196616	0.000775063	1.23797	0.308181	1.1951	0.104974	0.137277	0.0153181	0.000619118	1.23698	0.226097	1.21286	0.0649849			1.76624	0.891472	2.47017	0.849562	3.88009	0.880499	104	5	3	4	1	4	2		1.329	0.944178	1.57168	0.921717	1.96979	0.938349
Square	0.117669	1.09511	0.121247	0.0250747	0.000641542	1.31591	0.528192	1.21533	0.29344	0.122719	0.0183957	0.000363904	1.26179	0.348612	1.20836	0.134356	0.121507	0.0132812	0.00019112	1.24643	0.243089	1.22157	0.0750844			1.07292	0.831277	1.15979	1.08736	1.19778	1.01734	104	1	2	1	3	1	3		1.03582	0.911744	1.07693	1.04276	1.09443	1.00863
OldEPI	0.117669	1.09511	0.136124	0.0295467	0.00121359	1.31817	0.55588	1.21153	0.322556	0.138935	0.0265482	0.00115705	1.27768	0.417732	1.20835	0.187323	0.141449	0.0242797	0.00115499	1.25386	0.32524	1.20885	0.118718			2.02962	0.91376	3.68759	1.51603	7.23848	1.60854	104	6	4	7	5	8	6		1.42465	0.955908	1.92031	1.23127	2.69044	1.26828
EPI3	0.117669	1.09511	0.142088	0.0300055	0.00149662	1.32113	0.619275	1.20113	0.394742	0.142268	0.0261233	0.00128754	1.27745	0.384708	1.21639	0.162709	0.143	0.0216693	0.00111122	1.22548	0.284496	1.19443	0.0908024			2.50295	1.11825	4.10347	1.31682	6.96414	1.23031	104	8	6	8	4	7	4		1.58207	1.05747	2.0257	1.14753	2.63897	1.10919
EPI5	0.117669	1.09511	0.139462	0.0299231	0.00137033	1.37038	0.569361	1.25582	0.35	0.14002	0.0243876	0.00109432	1.30075	0.410551	1.23585	0.18836	0.142073	0.0209828	0.00103583	1.26254	0.292618	1.23076	0.104026			2.29175	0.991504	3.48768	1.52442	6.49169	1.40948	104	7	5	6	6	6	5		1.51385	0.995743	1.86753	1.23467	2.54788	1.18722
			population 5
	true	true	7							15							30
	mean	rr	mean	stdev	mse	mrr	srr	prr	mse_rr	mean	stdev	mse	mrr	srr	prr	mse_rr	mean	stdev	mse	mrr	srr	prr	mse_rr
Random	0.065515	1.14458	0.0668709	0.0199381	0.000399366	1.51474	1.25603	1.14891	1.57763	0.06676	0.0139332	0.000195684	1.37182	0.675362	1.20034	0.459223	0.066772	0.00999251	0.00010143	1.2616	0.406602	1.18587	0.16703
NewEPI	0.065515	1.14458	0.0687757	0.027296	0.000755704	1.55844	1.45453	1.13624	2.11573	0.0684246	0.0254924	0.000658328	1.66251	1.63656	1.17477	2.67924	0.0671366	0.0231842	0.000540137	1.37944	1.02476	1.1176	1.05086			1.89226	1.34108	3.36424	5.83429	5.3252	6.29145	117	7	7	7	7	7	7		1.37559	1.15805	1.83419	2.41543	2.30764	2.50828
Grid	0.065515	1.14458	0.067871	0.0286004	0.000823534	1.64596	1.53073	1.13316	2.34326	0.067697	0.0264447	0.000704083	1.68089	1.64844	1.12275	2.71783	0.0665646	0.0240949	0.000581666	1.50853	1.30637	1.13373	1.70672			2.0621	1.48531	3.59806	5.91832	5.73464	10.218	117	8	8	8	8	8	8		1.436	1.21873	1.89686	2.43276	2.39471	3.19657
Peri	0.065515	1.14458	0.0644876	0.0231909	0.000538873	1.34715	1.15329	0.967778	1.36134	0.0648843	0.0205512	0.000422749	1.27161	0.94073	0.994448	0.907513	0.0649901	0.0186861	0.000349446	1.19015	0.799251	0.991034	0.662379			1.34932	0.8629	2.16037	1.97619	3.44518	3.96562	117	3	2	3	3	3	5		1.1616	0.928924	1.46982	1.40577	1.85612	1.99139
Quad	0.065515	1.14458	0.0633229	0.0199569	0.000403083	1.32874	1.10989	0.975559	1.26042	0.0623525	0.0155596	0.000252102	1.16594	0.861799	0.937521	0.785571	0.0639412	0.0136156	0.000187861	1.08561	0.586565	0.942983	0.3847			1.00931	0.798935	1.28831	1.71065	1.85212	2.30318	117	2	1	2	2	2	2		1.00464	0.893832	1.13504	1.30792	1.36093	1.51762
Square	0.065515	1.14458	0.0669718	0.0185827	0.000347439	1.51558	1.26951	1.14839	1.61167	0.0664175	0.0140851	0.000199205	1.32575	0.708015	1.16258	0.501609	0.0670628	0.0101674	0.000105772	1.22672	0.386795	1.15274	0.149677			0.869976	1.02158	1.01799	1.0923	1.0428	0.896108	117	1	4	1	1	1	1		0.932725	1.01073	1.00896	1.04513	1.02118	0.94663
OldEPI	0.065515	1.14458	0.0613912	0.025409	0.000662623	1.36675	1.2798	0.947218	1.67684	0.0612226	0.0232503	0.000559001	1.375	1.2679	0.937867	1.6503	0.0610237	0.0214286	0.000479357	1.22011	0.83029	0.959008	0.723818			1.65919	1.06289	2.85665	3.59368	4.72597	4.33346	117	6	5	6	6	6	6		1.28809	1.03096	1.69016	1.8957	2.17393	2.0817
EPI3	0.065515	1.14458	0.0611442	0.0250443	0.000646321	1.34352	1.2907	0.928811	1.71246	0.061183	0.0219312	0.000499744	1.29823	1.1181	0.951705	1.28735	0.0615203	0.0200058	0.00041619	1.16387	0.782038	0.970988	0.641718			1.61837	1.08547	2.55383	2.80332	4.10321	3.84193	117	5	6	5	4	5	4		1.27215	1.04186	1.59807	1.67431	2.02564	1.96008
EPI5	0.065515	1.14458	0.0587107	0.0236204	0.000604222	1.36705	1.18662	0.998723	1.42934	0.0599279	0.0207115	0.000460182	1.33117	1.20449	0.981156	1.4775	0.0611577	0.0190594	0.000382247	1.16809	0.754601	0.995368	0.591687			1.51295	0.906005	2.35166	3.2174	3.76857	3.5424	117	4	3	4	5	4	3		1.23002	0.951843	1.53351	1.79371	1.94128	1.88213
			population 6
	true	true	7							15							30
	mean	rr	mean	stdev	mse	mrr	srr	prr	mse_rr	mean	stdev	mse	mrr	srr	prr	mse_rr	mean	stdev	mse	mrr	srr	prr	mse_rr
Random	0.231311	1.21589	0.231465	0.031661	0.00100244	1.2553	0.356315	1.20582	0.127062	0.232486	0.0229246	0.000526918	1.22378	0.219014	1.20203	0.0481592	0.231993	0.0159904	0.000256158	1.22192	0.157473	1.21093	0.0248223
NewEPI	0.231311	1.21589	0.232054	0.0419247	0.00175823	1.2619	0.407659	1.19415	0.166658	0.231541	0.0370915	0.00137583	1.23638	0.333571	1.18851	0.112019	0.232532	0.0346391	0.00120136	1.22758	0.298475	1.18729	0.0899053			1.75395	1.31163	2.61109	2.32602	4.68991	3.62195	130	6	5	6	6	7	8		1.32437	1.14527	1.61589	1.52513	2.16562	1.90314
Grid	0.231311	1.21589	0.222096	0.0421474	0.00186132	1.28979	0.436295	1.2142	0.190356	0.221122	0.0375169	0.00151133	1.26897	0.35958	1.21479	0.129299	0.220003	0.0350038	0.00135314	1.25143	0.297692	1.21384	0.0886247			1.85678	1.49814	2.86825	2.68482	5.28243	3.57036	130	7	7	8	8	8	7		1.36264	1.22398	1.69359	1.63854	2.29835	1.88954
Peri	0.231311	1.21589	0.215999	0.0342918	0.00141038	1.15908	0.383919	1.10268	0.16021	0.214367	0.0269664	0.00101429	1.10247	0.276158	1.06839	0.0980195	0.219586	0.0236619	0.000697361	1.11412	0.224723	1.09036	0.0662582			1.40695	1.26089	1.92494	2.03532	2.72239	2.6693	130	3	3	3	5	3	5		1.18615	1.12289	1.38742	1.42665	1.64997	1.6338
Quad	0.231311	1.21589	0.23538	0.033974	0.00117079	1.15067	0.305206	1.10883	0.104613	0.236253	0.0262325	0.000712567	1.15713	0.242225	1.13078	0.0659167	0.236682	0.0216702	0.000498445	1.1454	0.177977	1.1297	0.0391045			1.16794	0.82332	1.35233	1.36872	1.94585	1.57538	130	2	1	2	2	2	2		1.08071	0.90737	1.1629	1.16992	1.39494	1.25514
Square	0.231311	1.21589	0.220039	0.0309989	0.00108799	1.23773	0.333439	1.1908	0.111811	0.220469	0.0222107	0.000610864	1.2183	0.225889	1.19643	0.0514045	0.220415	0.0158321	0.000369378	1.21336	0.16801	1.2009	0.0284521			1.08534	0.879974	1.15932	1.06739	1.44199	1.14623	130	1	2	1	1	1	1		1.0418	0.938069	1.07672	1.03314	1.20083	1.07062
OldEPI	0.231311	1.21589	0.236506	0.0433212	0.00190371	1.20242	0.427947	1.12933	0.190631	0.234913	0.037835	0.00144446	1.18662	0.326098	1.13819	0.112377	0.232844	0.0345176	0.00119381	1.18851	0.270826	1.15479	0.0770799			1.89908	1.5003	2.74134	2.33345	4.66046	3.10526	130	8	8	7	7	6	6		1.37807	1.22487	1.6557	1.52756	2.15881	1.76218
EPI3	0.231311	1.21589	0.234583	0.0413809	0.00172308	1.20377	0.398434	1.13738	0.164913	0.231646	0.0358668	0.00128654	1.20538	0.303758	1.16453	0.0949068	0.229752	0.0313251	0.000983692	1.21251	0.250674	1.18512	0.0637842			1.71889	1.2979	2.44163	1.97069	3.84018	2.56963	130	5	4	5	4	5	4		1.31106	1.13925	1.56257	1.40381	1.95964	1.60301
EPI5	0.231311	1.21589	0.232319	0.041085	0.00168899	1.23138	0.421767	1.15952	0.181065	0.231174	0.0349221	0.00121957	1.21596	0.303064	1.17578	0.0934566	0.229529	0.0294356	0.00086963	1.22186	0.245957	1.19649	0.0608712			1.68488	1.42502	2.31454	1.94057	3.3949	2.45227	130	4	6	4	3	4	3		1.29803	1.19374	1.52136	1.39305	1.84252	1.56597
			population 7
	true	true	7							15							30
	mean	rr	mean	stdev	mse	mrr	srr	prr	mse_rr	mean	stdev	mse	mrr	srr	prr	mse_rr	mean	stdev	mse	mrr	srr	prr	mse_rr
Random	0.0352199	0.888177	0.0340888	0.0129712	0.000169531	-nan	-nan	0.967891	0.00635432	0.0337719	0.00889773	8.12662e-05	1.32265	0.942149	0.982985	0.896633	0.0338857	0.00645386	4.34323e-05	1.22323	0.955767	0.935105	0.915693
NewEPI	0.0352199	0.888177	0.0342977	0.0137349	0.000189498	-nan	-nan	0.894917	4.54276e-05	0.0343492	0.00997016	0.000100162	1.24839	0.9785	0.908864	0.95789	0.0349937	0.00803311	6.45819e-05	1.18417	0.895468	0.879394	0.80194			1.11777	0.00714909	1.23252	1.06832	1.48696	0.875774	143	6	1	4	5	6	7		1.05725	0.0845523	1.11019	1.0336	1.21941	0.935828
Grid	0.0352199	0.888177	0.0355001	0.0139097	0.000193558	0.94737	0.697422	0.860191	0.487181	0.0351899	0.0106062	0.000112492	1.24001	1.00391	0.868759	1.00821	0.0352295	0.00860395	7.40279e-05	1.19694	0.941668	0.874824	0.886917			1.14173	76.6692	1.38424	1.12444	1.70444	0.968575	143	7	7	7	8	8	8		1.06852	8.75609	1.17654	1.0604	1.30554	0.984162
Peri	0.0352199	0.888177	0.0433744	0.0131473	0.000239347	1.22443	0.792415	1.13945	0.69106	0.0404992	0.00974051	0.000122749	1.35294	0.987014	1.02047	0.991698	0.0361169	0.00738796	5.53865e-05	1.14925	0.853945	0.885784	0.729228			1.41182	108.754	1.51045	1.10602	1.27524	0.796367	143	8	8	8	7	4	5		1.1882	10.4285	1.229	1.05168	1.12926	0.892394
Quad	0.0352199	0.888177	0.0348506	0.013124	0.000172376	0.84612	0.613479	0.813312	0.381961	0.0342704	0.00913687	8.43838e-05	1.00682	0.736305	0.772917	0.55543	0.0340381	0.00701844	5.06551e-05	1.00279	0.686243	0.777754	0.483123			1.01678	60.1105	1.03836	0.619462	1.1663	0.527603	143	2	5	2	1	2	2		1.00835	7.75309	1.019	0.787059	1.07995	0.726363
Square	0.0352199	0.888177	0.0334921	0.0131021	0.00017465	-nan	-nan	0.956456	0.00466202	0.0334472	0.00890416	8.24264e-05	1.28867	0.979654	0.947673	0.963262	0.033284	0.00645467	4.54104e-05	1.19788	0.776919	0.957467	0.608404			1.03019	0.733677	1.01428	1.07431	1.04554	0.66442	143	3	2	1	6	1	3		1.01498	0.85655	1.00711	1.03649	1.02252	0.815119
OldEPI	0.0352199	0.888177	0.0337156	0.0132082	0.000176719	0.824053	0.601983	0.780693	0.373936	0.0336529	0.010252	0.000107559	1.05358	0.82468	0.785815	0.690575	0.033728	0.00804812	6.69979e-05	1.04263	0.846601	0.775572	0.729413			1.0424	58.8476	1.32354	0.770187	1.54258	0.79657	143	4	4	6	2	7	6		1.02098	7.67122	1.15045	0.877603	1.24201	0.892508
EPI3	0.0352199	0.888177	0.0346013	0.0134343	0.000180863	-nan	-nan	0.758244	0.0168826	0.0343585	0.0101223	0.000103203	1.02296	0.835381	0.755322	0.715512	0.0336152	0.00777838	6.30781e-05	0.989502	0.660935	0.776812	0.449237			1.06684	2.65687	1.26994	0.797998	1.45233	0.490598	143	5	3	5	4	5	1		1.03288	1.62999	1.12691	0.893308	1.20513	0.700427
EPI5	0.0352199	0.888177	0.0331722	0.01249	0.000160193	0.850021	0.634706	0.780038	0.414546	0.0328325	0.00935287	9.31757e-05	1.07195	0.833611	0.808652	0.701232	0.0329914	0.00699299	5.38681e-05	1.09496	0.809597	0.846187	0.65721			0.944918	65.2384	1.14655	0.782072	1.24028	0.717719	143	1	6	3	3	3	4		0.972069	8.07703	1.07077	0.884348	1.11368	0.847183
			population 8
	true	true	7							15							30
	mean	rr	mean	stdev	mse	mrr	srr	prr	mse_rr	mean	stdev	mse	mrr	srr	prr	mse_rr	mean	stdev	mse	mrr	srr	prr	mse_rr
Random	0.217618	1.09162	0.217663	0.0301683	0.000910128	1.14709	0.546248	1.0338	0.30173	0.219731	0.0216558	0.000473438	1.09654	0.276195	1.04878	0.0781189	0.219876	0.0146118	0.000218603	1.07328	0.182554	1.05015	0.0350457
NewEPI	0.217618	1.09162	0.222715	0.0397923	0.00160941	1.16512	0.70852	1.01113	0.508479	0.220984	0.0339605	0.00116465	1.07392	0.393355	0.99343	0.164369	0.221372	0.0340885	0.00117612	1.17618	0.402916	1.09581	0.162359			1.76833	1.68521	2.45997	2.10409	5.38015	4.63277	156	6	6	6	6	7	8		1.32979	1.29816	1.56843	1.45055	2.31952	2.15239
Grid	0.217618	1.09162	0.214337	0.0428387	0.00184592	1.24396	0.808681	1.034	0.657285	0.214146	0.0381634	0.0014685	1.15541	0.499819	1.03902	0.252586	0.214385	0.0344053	0.00119418	1.12243	0.360747	1.05091	0.131796			2.0282	2.17839	3.10178	3.23335	5.46276	3.76068	156	8	8	8	8	8	7		1.42415	1.47594	1.76119	1.79815	2.33726	1.93925
Peri	0.217618	1.09162	0.206256	0.0308753	0.00108238	1.05247	0.523154	0.921232	0.302722	0.202696	0.0257397	0.000885198	0.942178	0.297564	0.877871	0.134233	0.201332	0.0222526	0.000760412	0.919768	0.232434	0.875923	0.100551			1.18926	1.00329	1.86972	1.71832	3.4785	2.86913	156	2	2	3	3	4	5		1.09053	1.00164	1.36738	1.31085	1.86507	1.69385
Quad	0.217618	1.09162	0.224946	0.0323014	0.00109708	1.13257	0.534235	1.01619	0.291097	0.225526	0.024879	0.000681501	1.06746	0.310586	1.00834	0.103399	0.225882	0.0194675	0.000447277	1.02806	0.21591	0.991903	0.0565606			1.20541	0.964759	1.43947	1.32361	2.04607	1.61391	156	3	1	2	2	2	2		1.09791	0.982221	1.19978	1.15048	1.43041	1.2704
Square	0.217618	1.09162	0.215784	0.0305381	0.000935939	1.15917	0.551453	1.02928	0.307987	0.218509	0.022274	0.000496925	1.07712	0.269381	1.02997	0.0763668	0.216994	0.0148628	0.000221292	1.04674	0.180577	1.02429	0.0371414			1.02836	1.02074	1.04961	0.977571	1.0123	1.0598	156	1	3	1	1	1	1		1.01408	1.01031	1.0245	0.988722	1.00613	1.02946
OldEPI	0.217618	1.09162	0.224927	0.0394658	0.00161097	1.16945	0.741793	0.983963	0.561847	0.223553	0.0347285	0.00124129	1.11294	0.445116	1.00917	0.204926	0.223874	0.0313343	0.00102098	1.09088	0.348631	1.02496	0.125987			1.77005	1.86208	2.62187	2.62326	4.67045	3.59494	156	7	7	7	7	6	6		1.33043	1.36458	1.61922	1.61965	2.16112	1.89603
EPI3	0.217618	1.09162	0.224712	0.0389441	0.00156697	1.18651	0.610653	1.02492	0.377346	0.224167	0.0329195	0.00112658	1.13822	0.384427	1.05889	0.148855	0.222955	0.0280274	0.000814019	1.14124	0.297322	1.0926	0.0884013			1.7217	1.25061	2.37958	1.9055	3.72373	2.52246	156	5	4	5	4	5	4		1.31214	1.11831	1.54259	1.3804	1.9297	1.58822
EPI5	0.217618	1.09162	0.223936	0.03824	0.00150221	1.19931	0.659095	1.03422	0.437701	0.223329	0.0311086	0.00100036	1.15995	0.390678	1.07959	0.152774	0.221919	0.0261448	0.000702049	1.13606	0.2696	1.0954	0.0726984			1.65055	1.45064	2.11297	1.95566	3.21152	2.07439	156	4	5	4	5	3	3		1.28474	1.20442	1.45361	1.39845	1.79207	1.44027
			population 9
	true	true	7							15							30
	mean	rr	mean	stdev	mse	mrr	srr	prr	mse_rr	mean	stdev	mse	mrr	srr	prr	mse_rr	mean	stdev	mse	mrr	srr	prr	mse_rr
Random	0.0566972	1.13395	0.0544285	0.0159511	0.000259584	1.43019	0.83059	1.37448	0.747734	0.054312	0.0109293	0.000125139	1.77318	1.20115	1.34929	1.48913	0.0540308	0.00782714	6.83737e-05	1.76266	1.21806	1.37593	1.54222
NewEPI	0.0566972	1.13395	0.0555664	0.0161869	0.000263294	1.38424	0.892447	1.3036	0.825243	0.0544353	0.0126425	0.000164949	1.79003	1.27941	1.37247	1.69378	0.0545181	0.0105451	0.000115948	1.79327	1.47215	1.35197	2.21476			1.01429	1.10366	1.31813	1.13743	1.69579	1.43608	169	4	6	3	8	4	8		1.00712	1.05055	1.1481	1.0665	1.30223	1.19837
Grid	0.0566972	1.13395	0.0528628	0.0174472	0.000319107	1.31844	0.918313	1.05705	0.849212	0.0535223	0.0142218	0.000212339	1.52845	1.22406	1.03289	1.50854	0.0531171	0.0117052	0.000149829	1.47318	1.10749	1.07569	1.22993			1.2293	1.13571	1.69683	1.01303	2.19132	0.797503	169	8	7	7	6	8	6		1.10874	1.0657	1.30263	1.00649	1.48031	0.89303
Peri	0.0566972	1.13395	0.0565826	0.0159471	0.000254323	1.38537	0.94683	1.10096	0.897575	0.0550377	0.0129252	0.000169815	1.59111	1.20303	1.12845	1.44731	0.0531552	0.010133	0.000115223	1.33838	0.950723	1.0484	0.911193			0.979731	1.20039	1.35701	0.971916	1.6852	0.59083	169	2	8	4	5	3	4		0.989814	1.09562	1.16491	0.985858	1.29815	0.768655
Quad	0.0566972	1.13395	0.0524291	0.015374	0.000254576	1.06195	0.731645	0.865942	0.607133	0.0518686	0.0114943	0.000155434	1.2119	0.895482	0.880547	0.866101	0.0521444	0.00877916	9.78015e-05	1.14402	0.793407	0.894271	0.686941			0.980708	0.811963	1.2421	0.581614	1.4304	0.445422	169	3	2	2	1	2	1		0.990307	0.90109	1.11449	0.762637	1.19599	0.667399
Square	0.0566972	1.13395	0.0507651	0.0144701	0.000244573	1.40802	0.851041	1.35145	0.771577	0.051312	0.0104386	0.000137965	1.78265	1.21755	1.35117	1.52961	0.0511452	0.00786074	9.26159e-05	1.71213	1.20502	1.34354	1.496			0.942173	1.03189	1.10249	1.02718	1.35455	0.970028	169	1	5	1	7	1	7		0.970656	1.01582	1.05	1.0135	1.16385	0.9849
OldEPI	0.0566972	1.13395	0.0519481	0.0171413	0.000316378	1.07683	0.761887	0.874285	0.647898	0.0518494	0.0137504	0.000212575	1.25405	0.974426	0.891493	1.00829	0.0513409	0.0107063	0.000143315	1.22881	0.981565	0.919102	1.00963			1.21879	0.866481	1.69871	0.6771	2.09605	0.654658	169	7	4	8	4	7	5		1.10399	0.93085	1.30335	0.822861	1.44777	0.809109
EPI3	0.0566972	1.13395	0.0515223	0.0158704	0.000278649	1.10307	0.747964	0.914386	0.607658	0.0515943	0.012442	0.000180843	1.27632	0.976534	0.920885	0.999015	0.0513059	0.0099797	0.000128661	1.22647	0.875783	0.93691	0.805821			1.07344	0.812666	1.44514	0.670871	1.88172	0.522505	169	5	3	5	3	6	2		1.03607	0.90148	1.20214	0.819067	1.37176	0.722845
EPI5	0.0566972	1.13395	0.0513619	0.0165757	0.000303219	1.09813	0.719792	0.908297	0.56902	0.0513865	0.0125145	0.000184816	1.20782	0.907309	0.894708	0.880446	0.0514017	0.00969574	0.00012205	1.24256	0.916679	0.956377	0.871833			1.16809	0.760992	1.47689	0.591248	1.78504	0.565308	169	6	1	6	2	5	3		1.08078	0.872348	1.21527	0.768926	1.33605	0.75187
			population 10
	true	true	7							15							30
	mean	rr	mean	stdev	mse	mrr	srr	prr	mse_rr	mean	stdev	mse	mrr	srr	prr	mse_rr	mean	stdev	mse	mrr	srr	prr	mse_rr
Random	0.133158	1.07802	0.133568	0.0276692	0.000765753	1.21653	0.661284	1.04174	0.438613	0.134159	0.0188714	0.000357132	1.1189	0.39688	1.03072	0.159751	0.13362	0.0138087	0.000190894	1.0787	0.265898	1.03715	0.0723721
NewEPI	0.133158	1.07802	0.13345	0.0305977	0.000936304	1.26978	0.914478	1.0349	0.838129	0.134022	0.027402	0.000751616	1.10149	0.44236	1.01218	0.200017	0.13513	0.0235953	0.000560627	1.10232	0.374137	1.03945	0.141466			1.22272	1.91086	2.10459	1.25206	2.93686	1.95471	182	4	4	5	2	5	3		1.10577	1.38234	1.45072	1.11895	1.71373	1.39811
Grid	0.133158	1.07802	0.134218	0.0352019	0.0012403	1.41525	1.26694	1.02154	1.60833	0.133641	0.0304145	0.000925275	1.3006	0.860227	1.04421	0.741134	0.133419	0.028153	0.000792659	1.2226	0.745326	1.06	0.555836			1.61971	3.66685	2.59085	4.6393	4.15237	7.68025	182	8	8	8	8	8	8		1.27268	1.9149	1.60961	2.1539	2.03774	2.77133
Peri	0.133158	1.07802	0.11696	0.0259012	0.000933247	1.06497	0.816071	0.816477	0.734377	0.122944	0.021208	0.000554105	1.04871	0.673277	0.875393	0.49436	0.121405	0.0189171	0.00049599	0.953975	0.43934	0.868937	0.236735			1.21873	1.67432	1.55154	3.09456	2.59825	3.27109	182	3	3	3	6	3	6		1.10396	1.29395	1.24561	1.75914	1.61191	1.80861
Quad	0.133158	1.07802	0.131199	0.0273134	0.000749859	1.16227	0.793806	0.925477	0.653397	0.129154	0.0218493	0.000493424	1.10296	0.607613	0.944314	0.387071	0.13084	0.017183	0.000300629	1.01321	0.344943	0.933892	0.139759			0.979245	1.48969	1.38163	2.42296	1.57485	1.93111	182	2	2	2	3	2	2		0.989568	1.22053	1.17543	1.55659	1.25493	1.38964
Square	0.133158	1.07802	0.133628	0.0259202	0.000672078	1.22924	0.778129	1.03042	0.607751	0.132914	0.0178451	0.000318507	1.07927	0.369303	1.00182	0.142191	0.13286	0.0136973	0.000187705	1.05413	0.234677	1.0183	0.0586398			0.877669	1.38562	0.891847	0.89008	0.983296	0.810254	182	1	1	1	1	1	1		0.93684	1.17712	0.944377	0.94344	0.991613	0.900141
OldEPI	0.133158	1.07802	0.133339	0.0332892	0.0011082	1.2704	1.03262	0.935051	1.08674	0.132234	0.0293011	0.000859408	1.17821	0.764998	0.954729	0.600423	0.13247	0.0271053	0.000735171	1.10944	0.552065	0.963928	0.317793			1.44721	2.47768	2.40642	3.75849	3.85121	4.39109	182	7	7	7	7	7	7		1.203	1.57407	1.55126	1.93868	1.96245	2.09549
EPI3	0.133158	1.07802	0.132676	0.0317252	0.00100672	1.27622	1.0019	0.95704	1.01844	0.132732	0.0275607	0.000759773	1.12768	0.618097	0.964796	0.394864	0.131952	0.0242629	0.000590143	1.07017	0.422103	0.985244	0.186778			1.31468	2.32196	2.12743	2.47174	3.09148	2.58081	182	6	6	6	4	6	5		1.1466	1.5238	1.45857	1.57218	1.75826	1.60649
EPI5	0.133158	1.07802	0.131657	0.0316912	0.00100659	1.23996	0.937626	0.953889	0.894551	0.132108	0.026924	0.000726004	1.15712	0.677324	0.98352	0.467698	0.131597	0.0233747	0.000548813	1.07264	0.380728	0.99989	0.151058			1.3145	2.0395	2.03288	2.92767	2.87497	2.08724	182	5	5	4	5	4	4		1.14652	1.42811	1.42579	1.71104	1.69557	1.44473
			population 11
	true	true	7							15							30
	mean	rr	mean	stdev	mse	mrr	srr	prr	mse_rr	mean	stdev	mse	mrr	srr	prr	mse_rr	mean	stdev	mse	mrr	srr	prr	mse_rr
Random	0.27207	1.05314	0.269981	0.0350242	0.00123106	1.38655	0.886223	1.1459	0.793996	0.270155	0.0245341	0.000605589	1.21963	0.40114	1.12749	0.166441	0.270465	0.0183402	0.000338939	1.16329	0.24341	1.12203	0.0639943
NewEPI	0.27207	1.05314	0.270756	0.0415967	0.00173201	1.38882	0.915357	1.13641	0.844812	0.267988	0.0365752	0.00135441	1.21182	0.480555	1.09107	0.232372	0.270289	0.0353738	0.00125448	1.17933	0.356782	1.11163	0.130714			1.40693	1.064	2.23651	1.39612	3.70119	2.0426	195	2	5	2	4	2	4		1.18614	1.0315	1.4955	1.18157	1.92385	1.42919
Grid	0.27207	1.05314	0.27266	0.0458383	0.0021015	1.29951	0.968279	1.01556	0.938976	0.273524	0.0415239	0.00172635	1.19667	0.700536	1.01365	0.49231	0.272392	0.0389298	0.00151563	1.15924	0.630268	1.01345	0.398813			1.70707	1.1826	2.85069	2.95786	4.4717	6.23201	195	4	8	3	6	3	8		1.30655	1.08747	1.6884	1.71984	2.11464	2.4964
Peri	0.27207	1.05314	0.297773	0.0343327	0.00183938	1.20287	0.596522	1.03295	0.356246	0.314641	0.028129	0.00260353	1.2097	0.476341	1.09524	0.228673	0.31192	0.0240417	0.00216603	1.14772	0.353633	1.081	0.125832			1.49414	0.448675	4.29917	1.3739	6.39061	1.96631	195	3	1	4	3	4	3		1.22235	0.669832	2.07344	1.17213	2.52797	1.40225
Quad	0.27207	1.05314	0.335393	0.0383534	0.00548079	1.302	0.6064	1.15357	0.377807	0.333227	0.0286986	0.00456379	1.24051	0.410196	1.15757	0.179166	0.333729	0.0241872	0.00438685	1.2168	0.295725	1.16447	0.0998476			4.45209	0.47583	7.53611	1.07645	12.9429	1.56026	195	5	2	5	2	5	2		2.11	0.689805	2.7452	1.03752	3.59762	1.2491
Square	0.27207	1.05314	0.27149	0.0357362	0.00127741	1.31901	0.795397	1.10501	0.635347	0.27135	0.0252831	0.000639754	1.19892	0.413753	1.10297	0.173675	0.269452	0.0187704	0.000359182	1.18536	0.264407	1.13969	0.077402			1.03765	0.800189	1.05641	1.04346	1.05972	1.20951	195	1	3	1	1	1	1		1.01865	0.894533	1.02782	1.0215	1.02943	1.09978
OldEPI	0.27207	1.05314	0.335807	0.0476353	0.00633153	1.43145	0.948553	1.16431	0.912112	0.336109	0.0421442	0.00587713	1.34307	0.707713	1.16514	0.513402	0.334578	0.0394302	0.00546199	1.28828	0.514816	1.16706	0.278013			5.14316	1.14876	9.70481	3.08458	16.115	4.34435	195	8	7	8	7	8	7		2.26785	1.0718	3.11525	1.7563	4.01435	2.08431
EPI3	0.27207	1.05314	0.335509	0.0469318	0.0062271	1.43023	0.930762	1.17335	0.880768	0.334792	0.0418611	0.0056864	1.30971	0.765892	1.16356	0.598783	0.332291	0.0381419	0.00508137	1.26104	0.389755	1.18307	0.168791			5.05833	1.10929	9.38986	3.59757	14.992	2.63759	195	6	6	7	8	7	6		2.24907	1.05323	3.06429	1.89672	3.87195	1.62407
EPI5	0.27207	1.05314	0.335912	0.0469	0.00627541	1.38232	0.800952	1.15212	0.651321	0.334977	0.0409287	0.00563245	1.29564	0.561515	1.16288	0.327342	0.330702	0.0368681	0.00479697	1.26079	0.353408	1.19563	0.145201			5.09757	0.820308	9.30078	1.96671	14.1529	2.26896	195	7	4	6	5	6	5		2.25778	0.905709	3.04972	1.4024	3.76203	1.50631
			population 12
	true	true	7							15							30
	mean	rr	mean	stdev	mse	mrr	srr	prr	mse_rr	mean	stdev	mse	mrr	srr	prr	mse_rr	mean	stdev	mse	mrr	srr	prr	mse_rr
Random	0.201269	1.08862	0.199808	0.0257138	0.000663334	1.18064	0.357532	1.11553	0.128553	0.199424	0.018091	0.000330688	1.16502	0.251957	1.13021	0.0652121	0.19965	0.0133677	0.000181317	1.14117	0.173055	1.12406	0.031204
NewEPI	0.201269	1.08862	0.201373	0.0283176	0.000801897	1.17737	0.390257	1.10116	0.152458	0.202091	0.0205617	0.000423459	1.12407	0.261621	1.0871	0.0684479	0.201585	0.017029	0.000290087	1.12006	0.194592	1.09961	0.0379868			1.20889	1.18595	1.28054	1.04962	1.59989	1.21737	208	3	4	2	5	4	7		1.09949	1.08901	1.13161	1.02451	1.26487	1.10334
Grid	0.201269	1.08862	0.209105	0.0278107	0.000834838	1.20746	0.451753	1.11858	0.204978	0.208593	0.0209003	0.000490463	1.15533	0.274479	1.11653	0.0761177	0.208904	0.0168083	0.000340812	1.13786	0.193628	1.11889	0.0384081			1.25855	1.5945	1.48316	1.16723	1.87965	1.23087	208	4	7	6	8	8	8		1.12185	1.26274	1.21785	1.08039	1.371	1.10945
Peri	0.201269	1.08862	0.212783	0.0272601	0.000875685	1.10278	0.349755	1.03712	0.124981	0.21267	0.0191437	0.000496464	1.06736	0.231836	1.03372	0.0567619	0.209468	0.0148135	0.000286663	1.05607	0.168405	1.0382	0.0309024			1.32013	0.97221	1.50131	0.870421	1.58101	0.990334	208	8	1	7	1	3	2		1.14897	0.986007	1.22528	0.932964	1.25738	0.995155
Quad	0.201269	1.08862	0.212755	0.027127	0.000867802	1.13571	0.376492	1.05691	0.142752	0.211124	0.0186889	0.000446396	1.08518	0.235072	1.0492	0.0568128	0.212216	0.0138168	0.000310741	1.06757	0.154994	1.05103	0.0254361			1.30824	1.11045	1.3499	0.871201	1.7138	0.815156	208	7	3	3	2	6	1		1.14378	1.05378	1.16185	0.933381	1.30912	0.90286
Square	0.201269	1.08862	0.204699	0.0255519	0.000664664	1.23138	0.411499	1.15541	0.173792	0.20456	0.018997	0.000371717	1.19906	0.254533	1.16367	0.0704196	0.20498	0.0138895	0.00020669	1.17371	0.17121	1.15713	0.0340065			1.00201	1.35191	1.12407	1.07985	1.13994	1.08981	208	1	6	1	6	1	4		1.001	1.16272	1.06022	1.03916	1.06768	1.04394
OldEPI	0.201269	1.08862	0.210896	0.0277479	0.000862625	1.11594	0.362822	1.04371	0.133657	0.209593	0.0204804	0.000488736	1.08617	0.243419	1.05135	0.0606419	0.209541	0.0155961	0.000311664	1.07863	0.186126	1.05784	0.0355903			1.30044	1.0397	1.47793	0.929918	1.7189	1.14057	208	6	2	5	3	7	5		1.14037	1.01966	1.2157	0.964323	1.31107	1.06797
EPI3	0.201269	1.08862	0.210368	0.0278262	0.000857089	1.13892	0.393921	1.05604	0.156235	0.209998	0.0205203	0.000497278	1.09988	0.249189	1.06086	0.0628658	0.208128	0.0161045	0.000306401	1.10501	0.191541	1.08214	0.0367299			1.29209	1.21533	1.50377	0.964021	1.68987	1.17709	208	5	5	8	4	5	6		1.1367	1.10242	1.22628	0.981846	1.29995	1.08494
EPI5	0.201269	1.08862	0.208236	0.0256898	0.000708505	1.17336	0.527345	1.07353	0.27832	0.208006	0.0200421	0.000447073	1.12034	0.26675	1.07934	0.0712417	0.20666	0.0152664	0.000262126	1.11348	0.177494	1.09503	0.0315452			1.0681	2.16502	1.35195	1.09246	1.44568	1.01093	208	2	8	4	7	2	3		1.03349	1.4714	1.16273	1.04521	1.20236	1.00545
			population 13
	true	true	7							15							30
	mean	rr	mean	stdev	mse	mrr	srr	prr	mse_rr	mean	stdev	mse	mrr	srr	prr	mse_rr	mean	stdev	mse	mrr	srr	prr	mse_rr
Random	0.255839	1.03494	0.254702	0.0300347	0.000903376	1.10333	0.328503	1.03851	0.107927	0.253882	0.0214229	0.00046277	1.06643	0.216319	1.03573	0.0467945	0.255311	0.0147628	0.000218219	1.0586	0.14238	1.04494	0.0203721
NewEPI	0.255839	1.03494	0.256935	0.0333029	0.00111028	1.11409	0.35498	1.04374	0.126088	0.256239	0.0258941	0.000670664	1.07836	0.244929	1.03992	0.060015	0.255987	0.0219461	0.000481653	1.04357	0.182282	1.0215	0.0334074			1.22904	1.16827	1.44924	1.28252	2.2072	1.63986	221	6	3	4	3	6	3		1.10862	1.08087	1.20384	1.13248	1.48567	1.28057
Grid	0.255839	1.03494	0.258516	0.0328812	0.00108834	1.10125	0.383368	1.0206	0.147177	0.258532	0.0269273	0.000732332	1.07693	0.314365	1.01707	0.0991447	0.257695	0.0222766	0.000499692	1.06141	0.244088	1.0229	0.0597239			1.20475	1.36367	1.58249	2.11872	2.28986	2.93166	221	5	8	6	8	7	8		1.09761	1.16776	1.25797	1.45558	1.51323	1.71221
Peri	0.255839	1.03494	0.252008	0.0280311	0.000800419	1.04333	0.327926	0.9814	0.110402	0.259301	0.0237138	0.00057433	0.988656	0.236077	0.949097	0.0631014	0.260195	0.0187077	0.000368953	0.987802	0.190276	0.961667	0.0415739			0.886031	1.02293	1.24107	1.34848	1.69075	2.04073	221	1	2	2	4	2	4		0.941292	1.0114	1.11403	1.16124	1.30029	1.42854
Quad	0.255839	1.03494	0.267235	0.029779	0.00101666	1.0485	0.300322	0.99287	0.0919632	0.268863	0.0220745	0.000656908	1.01856	0.219426	0.983166	0.0508283	0.268511	0.0168516	0.000444556	1.01416	0.16524	0.99345	0.0290257			1.1254	0.852087	1.41951	1.0862	2.0372	1.42478	221	3	1	3	2	4	2		1.06085	0.923086	1.19143	1.04221	1.42731	1.19364
Square	0.255839	1.03494	0.255593	0.0302273	0.00091375	1.1266	0.382712	1.05144	0.146741	0.255221	0.0213778	0.000457392	1.06107	0.204338	1.03346	0.0417562	0.254892	0.0151338	0.000229929	1.06075	0.143292	1.04696	0.0206771			1.01148	1.35963	0.988378	0.892331	1.05366	1.01497	221	2	7	1	1	1	1		1.00573	1.16603	0.994172	0.944633	1.02648	1.00746
OldEPI	0.255839	1.03494	0.265943	0.0336778	0.00123628	1.08945	0.370745	1.01283	0.137941	0.268979	0.0266112	0.000880816	1.05491	0.304318	1.00247	0.0936637	0.268463	0.0208934	0.000595899	1.05569	0.229821	1.02115	0.0530079			1.36852	1.27809	1.90335	2.0016	2.73074	2.60199	221	8	5	8	7	8	7		1.16984	1.13053	1.37962	1.41478	1.6525	1.61307
EPI3	0.255839	1.03494	0.26643	0.0333514	0.00122448	1.1289	0.370846	1.05286	0.137848	0.267732	0.0256012	0.000796865	1.09056	0.272512	1.04168	0.0743082	0.264873	0.0198207	0.000474473	1.09065	0.209904	1.06106	0.0447419			1.35545	1.27723	1.72194	1.58797	2.1743	2.19624	221	7	4	7	5	5	5		1.16424	1.13015	1.31223	1.26015	1.47455	1.48197
EPI5	0.255839	1.03494	0.266106	0.0310695	0.00107073	1.11875	0.373447	1.04499	0.139564	0.265388	0.0248518	0.000708795	1.09836	0.283381	1.04629	0.0804336	0.263652	0.0192289	0.000430793	1.11104	0.206624	1.08213	0.0449204			1.18525	1.29313	1.53163	1.71887	1.97413	2.205	221	4	6	5	6	3	6		1.08869	1.13716	1.23759	1.31106	1.40504	1.48492
			population 14
	true	true	7							15							30
	mean	rr	mean	stdev	mse	mrr	srr	prr	mse_rr	mean	stdev	mse	mrr	srr	prr	mse_rr	mean	stdev	mse	mrr	srr	prr	mse_rr
Random	0.0541446	1.23463	0.056008	0.0169588	0.000291073	1.40281	0.846964	1.23543	0.717349	0.0560494	0.0122822	0.000154481	1.37624	0.619438	1.27273	0.385155	0.056221	0.00875316	8.09292e-05	1.26848	0.397012	1.22573	0.157698
NewEPI	0.0541446	1.23463	0.0576323	0.0212887	0.000465373	1.53164	1.36635	1.25327	1.86726	0.0566293	0.018062	0.000332409	1.30093	0.706329	1.20603	0.499719	0.0570693	0.0156064	0.000252113	1.31145	0.579676	1.23565	0.336025			1.59882	2.603	2.15179	1.29745	3.11524	2.13082	234	2	8	2	7	2	8		1.26444	1.61338	1.4669	1.13906	1.765	1.45973
Grid	0.0541446	1.23463	0.0588041	0.0236518	0.000581118	1.51653	1.27187	1.24396	1.61774	0.0587832	0.0211992	0.000470923	1.38836	0.805238	1.25407	0.648786	0.0586237	0.01821	0.000351666	1.31898	0.577409	1.2514	0.333682			1.99647	2.25517	3.04843	1.68448	4.34536	2.11596	234	4	6	5	8	4	7		1.41296	1.50172	1.74597	1.29788	2.08455	1.45463
Peri	0.0541446	1.23463	0.0656897	0.0187441	0.000484631	1.56419	1.03054	1.37683	1.08223	0.0699293	0.0143309	0.000454531	1.56295	0.575248	1.46085	0.382086	0.0673284	0.0119625	0.000316914	1.41614	0.412565	1.35803	0.185437			1.66498	1.50866	2.94232	0.992031	3.91594	1.1759	234	3	2	3	3	3	3		1.29034	1.22827	1.71532	0.996008	1.97887	1.08439
Quad	0.0541446	1.23463	0.0700778	0.0190725	0.000617627	1.45396	0.985652	1.27064	0.972807	0.0701352	0.0145001	0.000465952	1.33708	0.550062	1.26205	0.30332	0.0704387	0.0124762	0.000421153	1.32746	0.389883	1.28219	0.154271			2.1219	1.35611	3.01625	0.787527	5.20397	0.978268	234	5	1	4	1	5	2		1.45667	1.16452	1.73674	0.887427	2.28122	0.989074
Square	0.0541446	1.23463	0.0590786	0.0174961	0.000330458	1.53294	1.28606	1.29811	1.65798	0.0596865	0.0121534	0.000178418	1.34922	0.580667	1.26072	0.337855	0.0597042	0.0092233	0.000115978	1.32084	0.369721	1.2822	0.138957			1.13531	2.31126	1.15495	0.877192	1.43308	0.881157	234	1	7	1	2	1	1		1.06551	1.52028	1.07469	0.936585	1.19711	0.9387
OldEPI	0.0541446	1.23463	0.0706981	0.0248614	0.000892108	1.49262	1.09436	1.27781	1.19949	0.0707478	0.0212747	0.000728279	1.38441	0.697856	1.28421	0.489461	0.0702632	0.0192363	0.000629844	1.35637	0.558308	1.29548	0.315411			3.06489	1.67211	4.71437	1.27082	7.78266	2.0001	234	8	4	8	6	8	6		1.75068	1.2931	2.17126	1.1273	2.78974	1.41425
EPI3	0.0541446	1.23463	0.0716674	0.024145	0.00089003	1.43708	1.04151	1.25417	1.08512	0.0708063	0.0203288	0.000690872	1.3958	0.632855	1.31581	0.407096	0.068306	0.0173116	0.000500237	1.3414	0.497256	1.30291	0.251926			3.05775	1.51269	4.47223	1.05697	6.18116	1.59752	234	7	3	7	4	7	5		1.74864	1.22991	2.11476	1.02809	2.48619	1.26393
EPI5	0.0541446	1.23463	0.0689904	0.02411	0.00080169	1.53804	1.10203	1.30987	1.22013	0.0679312	0.0199691	0.000588835	1.39075	0.659729	1.30326	0.439952	0.0666342	0.0167925	0.000437978	1.32231	0.468411	1.27973	0.221443			2.75426	1.70089	3.81171	1.14227	5.41187	1.40422	234	6	5	6	5	6	4		1.6596	1.30418	1.95236	1.06877	2.32634	1.185
			population 15
	true	true	7							15							30
	mean	rr	mean	stdev	mse	mrr	srr	prr	mse_rr	mean	stdev	mse	mrr	srr	prr	mse_rr	mean	stdev	mse	mrr	srr	prr	mse_rr
Random	0.0722063	1.10658	0.0718715	0.0173516	0.00030119	1.32121	0.95894	1.03049	0.925356	0.0719483	0.0121338	0.000147296	1.11248	0.487651	0.994561	0.250352	0.0719341	0.00871943	7.61024e-05	1.04268	0.280314	0.994976	0.0910314
NewEPI	0.0722063	1.10658	0.0725073	0.0196224	0.000385129	1.35856	1.05281	1.01578	1.11665	0.0726679	0.01655	0.000274116	1.33191	0.958813	1.09514	0.919453	0.0921053	-nan	0.00039597	2.49239	0	2.49239	1.92047			1.27869	1.20673	1.86099	3.67265	5.20312	21.0968	247	7	5	8	8	8	8		1.13079	1.09851	1.36418	1.91641	2.28104	4.59312
Grid	0.0722063	1.10658	0.075154	0.0204281	0.000425996	1.59525	1.32562	1.16033	1.76016	0.0746916	0.0160873	0.000264978	1.35341	0.817102	1.13045	0.668225	0.0737803	0.0130406	0.000172535	1.25564	0.511992	1.14038	0.263278			1.41438	1.90214	1.79895	2.66915	2.26714	2.89217	247	8	8	7	7	7	7		1.18928	1.37918	1.34125	1.63375	1.5057	1.70064
Peri	0.0722063	1.10658	0.066801	0.0176525	0.000340828	1.25581	0.943796	0.971998	0.908863	0.0670811	0.0133803	0.0002053	1.20795	0.721977	1.03494	0.526383	0.070648	0.0101081	0.000104602	1.12744	0.372372	1.05195	0.141645			1.1316	0.982177	1.3938	2.10257	1.37449	1.55601	247	3	2	4	5	3	3		1.06377	0.991049	1.18059	1.45003	1.17239	1.2474
Quad	0.0722063	1.10658	0.0708692	0.0182122	0.000333472	1.37803	1.02518	1.06682	1.05257	0.0707055	0.0124538	0.000157349	1.21106	0.663946	1.05497	0.443488	0.0720236	0.00950372	9.03539e-05	1.14281	0.362575	1.07565	0.132417			1.10718	1.13748	1.06826	1.77146	1.18727	1.45463	247	2	3	2	4	2	2		1.05223	1.06653	1.03357	1.33096	1.08962	1.20608
Square	0.0722063	1.10658	0.0716418	0.0180237	0.000325172	1.20487	0.819593	0.960864	0.692966	0.0716055	0.0117693	0.000138877	1.12557	0.484927	1.01106	0.244278	0.0727666	0.00839305	7.07571e-05	1.03142	0.278806	0.98564	0.0923593			1.07963	0.748864	0.942848	0.97574	0.929762	1.01459	247	1	1	1	1	1	1		1.03905	0.865369	0.971003	0.987796	0.964242	1.00727
OldEPI	0.0722063	1.10658	0.0709281	0.0191309	0.000367625	1.36661	1.02605	1.05682	1.05525	0.0727696	0.0145345	0.000211569	1.22692	0.729233	1.05793	0.534148	0.0728549	0.011913	0.00014234	1.17733	0.434618	1.08807	0.189235			1.22058	1.14038	1.43636	2.13359	1.87038	2.07879	247	5	4	6	6	6	6		1.1048	1.06788	1.19848	1.46068	1.36762	1.4418
EPI3	0.0722063	1.10658	0.0723192	0.0186059	0.000346192	1.35821	1.07304	1.03043	1.15721	0.0724163	0.0144071	0.000207609	1.22408	0.649716	1.06983	0.423481	0.0715337	0.0115556	0.000133984	1.19711	0.380993	1.12493	0.145492			1.14941	1.25056	1.40947	1.69155	1.76058	1.59827	247	4	6	5	3	5	4		1.07211	1.11828	1.18721	1.30059	1.32687	1.26423
EPI5	0.0722063	1.10658	0.0732137	0.0195948	0.000384971	1.3899	1.12802	1.073	1.27356	0.0722947	0.0141967	0.000201554	1.27813	0.61709	1.13157	0.381425	0.0728012	0.0103779	0.000108055	1.2465	0.408809	1.17033	0.171189			1.27817	1.37629	1.36836	1.52355	1.41986	1.88055	247	6	7	3	2	4	5		1.13056	1.17315	1.16977	1.23432	1.19158	1.37133
			population 16
	true	true	7							15							30
	mean	rr	mean	stdev	mse	mrr	srr	prr	mse_rr	mean	stdev	mse	mrr	srr	prr	mse_rr	mean	stdev	mse	mrr	srr	prr	mse_rr
Random	0.233636	1.0267	0.232152	0.0310439	0.000965926	1.03146	0.439382	0.935125	0.201443	0.232063	0.0223695	0.000502869	0.968258	0.212809	0.93435	0.0538162	0.231041	0.0156038	0.000250212	0.955684	0.15562	0.937131	0.0322402
NewEPI	0.233636	1.0267	0.230979	0.03922	0.00154527	1.04514	0.464057	0.942092	0.222507	0.231335	0.0344357	0.00119111	1.02985	0.349416	0.964437	0.125968	0.229676	0.0302956	0.000933505	1.05212	0.270613	1.01603	0.0733452			1.59978	1.10457	2.36863	2.34071	3.73085	2.27496	260	4	5	6	7	6	7		1.26482	1.05099	1.53904	1.52994	1.93154	1.5083
Grid	0.233636	1.0267	0.237613	0.0409095	0.0016894	1.17641	0.811955	1.03245	0.659304	0.237131	0.0360469	0.00131159	1.10431	0.361751	1.03809	0.130994	0.237737	0.0328458	0.00109566	1.06378	0.278667	1.02571	0.0776563			1.749	3.27291	2.60822	2.43409	4.37894	2.40868	260	6	8	7	8	7	8		1.3225	1.80912	1.615	1.56016	2.09259	1.55199
Peri	0.233636	1.0267	0.227881	0.031153	0.00100363	1.06822	0.349122	0.998068	0.122706	0.230031	0.0277782	0.000784624	1.0569	0.281867	1.00958	0.0797421	0.232604	0.0232567	0.000541939	1.05219	0.212831	1.02367	0.0453062			1.03903	0.609136	1.5603	1.48175	2.16591	1.40527	260	2	1	2	3	2	4		1.01933	0.780472	1.24912	1.21727	1.4717	1.18544
Quad	0.233636	1.0267	0.247144	0.0335689	0.00130934	1.07346	0.357201	1.00512	0.128058	0.247285	0.0255122	0.000837168	1.0553	0.246877	1.01781	0.0610273	0.245297	0.0209675	0.000575615	1.02738	0.177768	1.00645	0.0320115			1.35553	0.635706	1.66478	1.13399	2.3005	0.992907	260	3	2	3	2	3	2		1.16427	0.797312	1.29026	1.06489	1.51674	0.996447
Square	0.233636	1.0267	0.237366	0.0305373	0.00094644	1.03442	0.395848	0.943703	0.163584	0.235652	0.0212394	0.000455176	0.988559	0.224451	0.950944	0.0561172	0.235835	0.0155683	0.000247208	0.963995	0.151058	0.94636	0.029273			0.979826	0.812064	0.905159	1.04276	0.98799	0.907967	260	1	3	1	1	1	1		0.989862	0.901146	0.951399	1.02115	0.993977	0.952873
OldEPI	0.233636	1.0267	0.245641	0.0427722	0.00197358	1.13822	0.492256	1.02681	0.242316	0.245782	0.0367769	0.00150007	1.09747	0.345727	1.03672	0.119628	0.244105	0.0325238	0.0011674	1.07528	0.257975	1.04135	0.0667657			2.0432	1.2029	2.98302	2.22289	4.66562	2.07088	260	8	6	8	6	8	6		1.42941	1.09677	1.72714	1.49094	2.16001	1.43906
EPI3	0.233636	1.0267	0.245674	0.0408485	0.00181351	1.12252	0.426681	1.03139	0.182079	0.242005	0.0331526	0.00116913	1.09695	0.30172	1.04996	0.091576	0.240679	0.0284493	0.000858966	1.08342	0.223607	1.06093	0.0511718			1.87749	0.903874	2.32493	1.70164	3.43295	1.5872	260	7	4	4	5	5	5		1.37021	0.950723	1.52477	1.30447	1.85282	1.25984
EPI5	0.233636	1.0267	0.243533	0.0393484	0.00164625	1.13028	0.498245	1.03219	0.248278	0.242465	0.0330658	0.0011713	1.08936	0.286324	1.04831	0.0824484	0.241779	0.0272456	0.000808631	1.08274	0.208958	1.06219	0.044923			1.70432	1.2325	2.32923	1.53204	3.23178	1.39338	260	5	7	5	4	4	3		1.3055	1.11018	1.52618	1.23776	1.79771	1.18042
			population 17
	true	true	7							15							30
	mean	rr	mean	stdev	mse	mrr	srr	prr	mse_rr	mean	stdev	mse	mrr	srr	prr	mse_rr	mean	stdev	mse	mrr	srr	prr	mse_rr
Random	0.196446	1.06087	0.194807	0.0273894	0.000752865	1.24522	0.794547	1.04374	0.631598	0.195464	0.0194885	0.000380766	1.10989	0.326532	1.0478	0.106794	0.195651	0.0131377	0.000173231	1.06956	0.19366	1.0433	0.0378129
NewEPI	0.196446	1.06087	0.194873	0.0300948	0.000908171	1.35845	0.918445	1.09592	0.84477	0.1951	0.0237782	0.000567214	1.15008	0.42222	1.0565	0.178289	0.196913	0.0199127	0.000396734	1.09047	0.283715	1.02508	0.0817751			1.20629	1.33751	1.48967	1.66947	2.2902	2.16263	273	3	8	4	5	5	4		1.09831	1.15651	1.22052	1.29208	1.51334	1.47059
Grid	0.196446	1.06087	0.206907	0.031714	0.00111521	1.29911	0.779691	1.0841	0.608458	0.206442	0.0239367	0.000672886	1.20668	0.531925	1.08597	0.283574	0.206639	0.0195198	0.00048492	1.16152	0.329382	1.09525	0.109674			1.48129	0.963362	1.76719	2.65534	2.79926	2.90045	273	7	5	7	8	7	8		1.21708	0.98151	1.32936	1.62952	1.6731	1.70307
Peri	0.196446	1.06087	0.210521	0.028815	0.00102841	1.33778	0.73506	1.14808	0.547919	0.201711	0.0216695	0.000497287	1.15007	0.343848	1.07172	0.118349	0.203085	0.0174692	0.000349249	1.12975	0.258856	1.0825	0.0674743			1.36599	0.867511	1.30602	1.1082	2.01609	1.78443	273	5	2	2	1	2	3		1.16876	0.931403	1.14281	1.05271	1.41989	1.33582
Quad	0.196446	1.06087	0.206659	0.0266761	0.00081592	1.2939	0.739617	1.10167	0.548698	0.207313	0.0196943	0.000505957	1.18292	0.380939	1.10093	0.146719	0.207707	0.0150197	0.000352401	1.13125	0.257098	1.09047	0.0669755			1.08375	0.868745	1.32879	1.37385	2.03428	1.77124	273	2	3	3	3	3	2		1.04103	0.932065	1.15273	1.17212	1.42628	1.33088
Square	0.196446	1.06087	0.203216	0.026971	0.000773268	1.29297	0.72945	1.10039	0.533659	0.203047	0.0188233	0.00039789	1.15221	0.34936	1.0844	0.122606	0.203624	0.0132569	0.000227269	1.09654	0.190597	1.07073	0.0364244			1.0271	0.844934	1.04497	1.14806	1.31194	0.963281	273	1	1	1	2	1	1		1.01346	0.919203	1.02224	1.07148	1.1454	0.981469
OldEPI	0.196446	1.06087	0.209414	0.029217	0.0010218	1.30925	0.772696	1.09625	0.598311	0.209299	0.022462	0.000669741	1.1956	0.470524	1.09067	0.222281	0.209553	0.0179606	0.000494376	1.15132	0.305253	1.09764	0.0945314			1.35722	0.947296	1.75893	2.0814	2.85386	2.49998	273	4	4	6	7	8	7		1.165	0.973292	1.32625	1.44271	1.68934	1.58113
EPI3	0.196446	1.06087	0.210748	0.0302094	0.00111716	1.33646	0.902419	1.10359	0.816185	0.210772	0.0223982	0.000706914	1.20664	0.38827	1.11701	0.153905	0.208412	0.0179258	0.000464519	1.20459	0.289775	1.1501	0.0919315			1.48387	1.29225	1.85656	1.44114	2.6815	2.43122	273	8	7	8	4	6	6		1.21814	1.13677	1.36256	1.20048	1.63753	1.55924
EPI5	0.196446	1.06087	0.21098	0.0298249	0.00110076	1.34857	0.848991	1.11806	0.724056	0.208294	0.0221495	0.000630975	1.2425	0.425096	1.14456	0.187711	0.206198	0.0173001	0.000394395	1.19648	0.274124	1.14913	0.0829338			1.4621	1.14639	1.65712	1.75769	2.2767	2.19327	273	6	6	5	6	4	5		1.20917	1.07069	1.28729	1.32578	1.50887	1.48097
			population 18
	true	true	7							15							30
	mean	rr	mean	stdev	mse	mrr	srr	prr	mse_rr	mean	stdev	mse	mrr	srr	prr	mse_rr	mean	stdev	mse	mrr	srr	prr	mse_rr
Random	0.0833956	1.04102	0.0817328	0.0194701	0.00038185	1.33794	1.05619	1.01322	1.11631	0.081323	0.0141507	0.000204538	1.17355	0.54363	1.04102	0.295534	0.0811368	0.0100157	0.000105416	1.08451	0.311665	1.02783	0.097309
NewEPI	0.0833956	1.04102	0.0819312	0.0216555	0.000471105	1.31353	1.0388	1.00246	1.08059	0.08117	0.0187857	0.000357856	1.13226	0.607858	0.971115	0.374378	0.0814063	0.0159504	0.000258372	1.09365	0.44288	1.00326	0.197569			1.23374	0.968004	1.74958	1.26679	2.45097	2.03032	286	2	6	2	6	2	6		1.11074	0.983872	1.32272	1.12552	1.56556	1.42489
Grid	0.0833956	1.04102	0.0837608	0.0249389	0.000622082	1.39655	1.13061	1.01592	1.27891	0.0836616	0.02076	0.000431048	1.32746	1.0588	1.03035	1.12117	0.0848666	0.0187361	0.000353205	1.17115	0.720937	0.98804	0.522557			1.62913	1.14566	2.10743	3.79372	3.35057	5.37008	286	4	8	3	8	3	8		1.27637	1.07035	1.4517	1.94775	1.83046	2.31734
Peri	0.0833956	1.04102	0.0960197	0.0207795	0.000591155	1.12235	0.741237	0.914575	0.565421	0.0960097	0.0166389	0.000435968	0.969697	0.497529	0.855951	0.281786	0.0974831	0.0138213	0.000389486	0.958317	0.316645	0.892396	0.122353			1.54814	0.506509	2.13148	0.953481	3.69474	1.25737	286	3	2	4	2	5	3		1.24424	0.711694	1.45996	0.976463	1.92217	1.12132
Quad	0.0833956	1.04102	0.0981198	0.0210652	0.000660545	1.05883	0.649953	0.879988	0.44837	0.0968778	0.0160977	0.000440906	1.03341	0.430793	0.930106	0.197885	0.098174	0.0134173	0.000398425	0.937125	0.271009	0.890862	0.0959933			1.72986	0.401654	2.15562	0.669584	3.77954	0.986479	286	5	1	5	1	6	1		1.31524	0.633762	1.4682	0.818281	1.9441	0.993216
Square	0.0833956	1.04102	0.0813802	0.0204019	0.000420299	1.35631	1.04335	1.03204	1.08866	0.0814481	0.0143086	0.000208529	1.17459	0.537375	1.0425	0.288774	0.0819396	0.0103605	0.00010946	1.07895	0.314754	1.01979	0.0995208			1.10069	0.975231	1.01951	0.977128	1.03836	1.02273	286	1	7	1	3	1	2		1.04914	0.987538	1.00971	0.988498	1.019	1.0113
OldEPI	0.0833956	1.04102	0.0979671	0.0248211	0.000828416	1.16241	0.979054	0.87382	0.986503	0.0979978	0.021966	0.000695729	1.0504	0.619427	0.887664	0.407208	0.0983377	0.0194744	0.000602518	1.0243	0.521442	0.901942	0.291244			2.16948	0.883717	3.40147	1.37787	5.71561	2.99298	286	7	5	8	7	8	7		1.47292	0.940062	1.84431	1.17383	2.39073	1.73002
EPI3	0.0833956	1.04102	0.0986117	0.0254163	0.000877518	1.13383	0.970217	0.852049	0.977031	0.097312	0.0207211	0.00062303	1.07547	0.569734	0.920179	0.339199	0.0955738	0.0171628	0.00044287	1.10033	0.40463	1.01793	0.164259			2.29807	0.875233	3.04604	1.14775	4.20115	1.68801	286	8	4	7	4	7	5		1.51594	0.935539	1.74529	1.07133	2.04967	1.29923
EPI5	0.0833956	1.04102	0.0976641	0.0240086	0.000780003	1.13698	0.964855	0.892416	0.953028	0.0958977	0.0199804	0.000555519	1.11876	0.591298	0.974385	0.354074	0.0938422	0.0165834	0.00038414	1.08512	0.364011	1.01959	0.132963			2.0427	0.853731	2.71597	1.19808	3.64403	1.3664	286	6	3	6	5	4	4		1.42923	0.923976	1.64802	1.09457	1.90894	1.16893
			population 19
	true	true	7							15							30
	mean	rr	mean	stdev	mse	mrr	srr	prr	mse_rr	mean	stdev	mse	mrr	srr	prr	mse_rr	mean	stdev	mse	mrr	srr	prr	mse_rr
Random	0.246729	1.11909	0.247103	0.0290415	0.000843549	1.16852	0.397279	1.08632	0.158904	0.246642	0.0214404	0.000459698	1.13069	0.243746	1.09332	0.0600762	0.246349	0.01406	0.000197828	1.1123	0.164858	1.09339	0.0278387
NewEPI	0.246729	1.11909	0.245935	0.0328383	0.00107898	1.17257	0.506543	1.06995	0.259001	0.245605	0.0239415	0.000574459	1.14009	0.266622	1.09783	0.0715393	0.245654	0.0199548	0.00039935	1.11108	0.188639	1.08947	0.036462			1.2791	1.62991	1.24964	1.19081	2.01867	1.30976	299	7	8	5	3	6	2		1.13097	1.27668	1.11787	1.09124	1.4208	1.14445
Grid	0.246729	1.11909	0.24314	0.0328571	0.00109247	1.20331	0.459119	1.10095	0.211119	0.244453	0.0263404	0.000698997	1.1289	0.285602	1.08076	0.0830377	0.245458	0.0221477	0.000492136	1.10095	0.214419	1.07287	0.0481118			1.29509	1.32859	1.52056	1.38221	2.4877	1.72824	299	8	7	8	8	8	8		1.13802	1.15265	1.23311	1.17567	1.57724	1.31462
Peri	0.246729	1.11909	0.245707	0.0285223	0.000814566	1.13121	0.394832	1.04559	0.161295	0.242434	0.0231546	0.000554583	1.08664	0.261213	1.04528	0.0736801	0.244464	0.0181668	0.000335163	1.06759	0.180487	1.04625	0.0378812			0.965642	1.01504	1.20641	1.22644	1.69421	1.36074	299	1	4	4	5	3	5		0.982671	1.00749	1.09836	1.10745	1.30162	1.16651
Quad	0.246729	1.11909	0.246227	0.0295006	0.000870537	1.08829	0.351562	1.01368	0.134707	0.24375	0.0214967	0.000470983	1.04914	0.238714	1.01227	0.0683949	0.243517	0.0162542	0.000274516	1.04263	0.166019	1.02229	0.0369325			1.03199	0.847724	1.02455	1.13847	1.38765	1.32666	299	3	1	2	2	2	4		1.01587	0.920719	1.0122	1.06699	1.17799	1.15181
Square	0.246729	1.11909	0.24358	0.0292249	0.000864011	1.17907	0.397957	1.09171	0.159119	0.244498	0.0205211	0.000426093	1.12072	0.245435	1.08248	0.0615786	0.243373	0.014561	0.000223285	1.09861	0.166221	1.07958	0.0291905			1.02426	1.00135	0.926897	1.02501	1.12868	1.04856	299	2	3	1	1	1	1		1.01206	1.00068	0.962755	1.01243	1.0624	1.02399
OldEPI	0.246729	1.11909	0.244	0.0320113	0.00103217	1.11701	0.418998	1.02526	0.184363	0.245036	0.0244865	0.000602455	1.07025	0.259626	1.02564	0.0761386	0.244975	0.0201499	0.000409095	1.0562	0.191863	1.03134	0.0445115			1.22361	1.16022	1.31054	1.26737	2.06793	1.59891	299	6	6	7	7	7	7		1.10617	1.07713	1.14479	1.12577	1.43803	1.26448
EPI3	0.246729	1.11909	0.245823	0.0317611	0.00100959	1.11533	0.373038	1.03166	0.146801	0.246001	0.0239968	0.000576376	1.08107	0.259727	1.03764	0.0740922	0.244521	0.0185555	0.000349182	1.07349	0.19399	1.04992	0.0424166			1.19683	0.923834	1.25381	1.2333	1.76508	1.52366	299	5	2	6	6	5	6		1.094	0.961163	1.11974	1.11054	1.32856	1.23437
EPI5	0.246729	1.11909	0.244653	0.0313444	0.000986781	1.13528	0.403447	1.04242	0.168648	0.243365	0.0226777	0.000525594	1.09502	0.258886	1.05159	0.0715782	0.242637	0.0180075	0.000341014	1.07932	0.180768	1.05709	0.0365211			1.1698	1.06132	1.14335	1.19146	1.72379	1.31188	299	4	5	3	4	4	3		1.08157	1.0302	1.06927	1.09154	1.31293	1.14537
			population 20
	true	true	7							15							30
	mean	rr	mean	stdev	mse	mrr	srr	prr	mse_rr	mean	stdev	mse	mrr	srr	prr	mse_rr	mean	stdev	mse	mrr	srr	prr	mse_rr
Random	0.310413	1.1703	0.308834	0.0344578	0.00118983	1.23944	0.332898	1.18427	0.111016	0.308688	0.0245035	0.000603397	1.20988	0.205451	1.18535	0.0424366	0.309419	0.0173289	0.000301279	1.18576	0.136109	1.17457	0.0185439
NewEPI	0.310413	1.1703	0.311799	0.0393629	0.00155136	1.22932	0.366186	1.16134	0.134172	0.309325	0.032339	0.00104699	1.21336	0.261448	1.17522	0.0683793	0.310908	0.0302382	0.000914594	1.18879	0.218903	1.16139	0.0479979			1.30385	1.20858	1.73517	1.61133	3.03571	2.58834	312	7	7	5	5	6	5		1.14186	1.09936	1.31726	1.26938	1.74233	1.60883
Grid	0.310413	1.1703	0.298532	0.0401133	0.00175023	1.1602	0.362542	1.09042	0.137818	0.297002	0.034166	0.00134717	1.14019	0.273396	1.09614	0.0802451	0.294787	0.030415	0.00116924	1.13392	0.228841	1.10228	0.0569949			1.47099	1.24142	2.23264	1.89094	3.88094	3.07351	312	8	8	8	8	8	7		1.21284	1.11419	1.4942	1.37511	1.97001	1.75314
Peri	0.310413	1.1703	0.312043	0.0332113	0.00110565	1.08803	0.278087	1.04138	0.0939527	0.310593	0.0274675	0.000754496	1.07096	0.204887	1.04408	0.0579102	0.306945	0.0237723	0.000577149	1.05713	0.158259	1.04055	0.041881			0.929246	0.846297	1.25041	1.36463	1.91567	2.25848	312	2	3	2	2	3	2		0.963974	0.919944	1.11822	1.16817	1.38408	1.50282
Quad	0.310413	1.1703	0.305176	0.0327335	0.00109891	1.03701	0.252842	0.997213	0.0938882	0.306599	0.0249491	0.000637004	1.03231	0.182982	1.00968	0.0592812	0.307239	0.0203465	0.000424054	1.02368	0.138593	1.00969	0.0450036			0.923582	0.845716	1.0557	1.39694	1.40751	2.42687	312	1	2	1	3	1	4		0.961032	0.919628	1.02747	1.18192	1.18639	1.55784
Square	0.310413	1.1703	0.295865	0.0331569	0.00131102	1.19421	0.30341	1.14549	0.0926732	0.295453	0.0243365	0.000816067	1.17463	0.202974	1.15123	0.0415621	0.296374	0.0166896	0.000475636	1.1589	0.132832	1.14838	0.0181248			1.10186	0.834771	1.35245	0.979393	1.57872	0.977401	312	3	1	3	1	2	1		1.04969	0.913658	1.16295	0.989643	1.25647	0.988636
OldEPI	0.310413	1.1703	0.308086	0.0391173	0.00153558	1.04779	0.284752	0.996071	0.111439	0.306251	0.0322803	0.00105934	1.03139	0.221113	0.99805	0.078561	0.303952	0.028216	0.000837887	1.03186	0.188249	1.00878	0.0615264			1.29058	1.00381	1.75563	1.85126	2.7811	3.31788	312	6	5	7	7	4	8		1.13604	1.0019	1.325	1.36061	1.66766	1.8215
EPI3	0.310413	1.1703	0.30498	0.0380013	0.00147362	1.0449	0.267601	0.999841	0.100667	0.302533	0.0312504	0.00103868	1.04907	0.219848	1.01931	0.0711311	0.296029	0.0267741	0.000923752	1.06841	0.184974	1.04708	0.0493985			1.23851	0.906773	1.72139	1.67617	3.0661	2.66387	312	5	4	4	6	7	6		1.11288	0.952246	1.31202	1.29467	1.75103	1.63214
EPI5	0.310413	1.1703	0.302896	0.0366901	0.00140267	1.07516	0.324744	1.01766	0.128758	0.29813	0.0299704	0.0010491	1.0818	0.227137	1.05099	0.0658261	0.29463	0.0254451	0.000896556	1.092	0.180665	1.0721	0.0422831			1.17888	1.15981	1.73865	1.55116	2.97584	2.28016	312	4	6	6	4	5	3		1.08576	1.07694	1.31858	1.24546	1.72506	1.51002
			population 21
	true	true	7							15							30
	mean	rr	mean	stdev	mse	mrr	srr	prr	mse_rr	mean	stdev	mse	mrr	srr	prr	mse_rr	mean	stdev	mse	mrr	srr	prr	mse_rr
Random	0.106939	1.09295	0.106274	0.0223936	0.000501915	1.11061	0.495328	1.02012	0.250654	0.106741	0.0156649	0.000245428	1.08656	0.335399	1.03889	0.115415	0.106897	0.0114711	0.000131588	1.05574	0.211932	1.03603	0.0481551
NewEPI	0.106939	1.09295	0.112059	0.028078	0.000814588	1.11736	0.640315	0.989824	0.420638	0.113392	0.0241396	0.000624361	1.04374	0.378839	0.98734	0.154672	0.108745	0.0230168	0.000533035	1.11685	0.374359	1.07363	0.140518			1.62296	1.67816	2.54397	1.34014	4.05079	2.91803	325	2	8	2	8	3	8		1.27395	1.29544	1.59498	1.15765	2.01266	1.70822
Grid	0.106939	1.09295	0.120368	0.0310491	0.00114438	1.18928	0.593268	1.07138	0.352432	0.119688	0.0269001	0.000886152	1.09094	0.380517	1.03832	0.147778	0.117901	0.0232963	0.000662883	1.05358	0.292594	1.027	0.0899607			2.28003	1.40605	3.61064	1.2804	5.03757	1.86815	325	3	7	4	7	5	7		1.50998	1.18577	1.90017	1.13155	2.24445	1.3668
Peri	0.106939	1.09295	0.142073	0.0263629	0.0019294	1.14616	0.416998	1.06763	0.174528	0.136881	0.0213916	0.00135412	1.09802	0.303813	1.05692	0.0936005	0.135025	0.0171724	0.00108371	1.09528	0.217224	1.07387	0.0475503			3.84407	0.696292	5.51739	0.810991	8.23568	0.987442	325	6	2	6	2	6	2		1.96063	0.834441	2.34891	0.90055	2.86979	0.993701
Quad	0.106939	1.09295	0.144111	0.0258335	0.00204913	1.00161	0.338821	0.948495	0.135667	0.144267	0.0194587	0.00177202	1.03745	0.265863	1.00339	0.0787041	0.140088	0.0155841	0.00134172	1.02862	0.196077	1.01094	0.0451718			4.08261	0.541252	7.22012	0.681923	10.1964	0.93805	325	7	1	8	1	8	1		2.02055	0.735698	2.68703	0.825786	3.19318	0.96853
Square	0.106939	1.09295	0.110374	0.023887	0.000582388	1.13356	0.54726	1.02702	0.30384	0.110321	0.016211	0.000274234	1.07238	0.325834	1.02815	0.110367	0.109805	0.0110699	0.000130757	1.05207	0.212815	1.03125	0.0490971			1.16033	1.21219	1.11737	0.956261	0.993683	1.01956	325	1	6	1	3	1	3		1.07719	1.10099	1.05706	0.977886	0.996836	1.00973
OldEPI	0.106939	1.09295	0.141355	0.0322496	0.0022245	1.09549	0.505794	1.00538	0.263496	0.138288	0.0268269	0.00170244	1.05822	0.329051	1.01584	0.114221	0.132792	0.0229693	0.00119597	1.06806	0.276996	1.04399	0.0791239			4.43202	1.05123	6.93662	0.989651	9.08873	1.64311	325	8	5	7	4	7	6		2.10524	1.0253	2.63375	0.994812	3.01475	1.28184
EPI3	0.106939	1.09295	0.135345	0.0310203	0.00176916	1.13367	0.483244	1.04726	0.235612	0.129316	0.0246125	0.00110651	1.10503	0.349184	1.06989	0.122461	0.122272	0.0203267	0.000648275	1.13205	0.273769	1.11514	0.0754419			3.52482	0.93999	4.50847	1.06105	4.92656	1.56664	325	5	4	5	6	4	4		1.87745	0.969531	2.12332	1.03007	2.21959	1.25166
EPI5	0.106939	1.09295	0.131148	0.0294713	0.00145463	1.12002	0.46408	1.04119	0.218049	0.123994	0.0226834	0.00080541	1.13006	0.349291	1.08693	0.12204	0.115861	0.0170648	0.000370809	1.15403	0.274022	1.12775	0.0762991			2.89816	0.869922	3.28165	1.05741	2.81796	1.58445	325	4	3	3	5	2	5		1.7024	0.932696	1.81153	1.0283	1.67868	1.25875
			population 22
	true	true	7							15							30
	mean	rr	mean	stdev	mse	mrr	srr	prr	mse_rr	mean	stdev	mse	mrr	srr	prr	mse_rr	mean	stdev	mse	mrr	srr	prr	mse_rr
Random	0.0530105	1.78214	0.0518946	0.0162755	0.000266137	2.51334	2.02338	1.91727	4.11233	0.0515194	0.0115235	0.000135014	2.18284	1.08599	1.93414	1.20248	0.0509831	0.00811389	6.99455e-05	2.11197	0.717187	1.98566	0.555778
NewEPI	0.0530105	1.78214	0.0524243	0.019177	0.000368101	2.55341	2.29025	1.87687	5.25422	0.0522824	0.0168278	0.000283705	2.20896	1.64845	1.83354	2.72003	0.0523974	0.0144978	0.000210562	2.10394	1.11209	1.89079	1.24855			1.38313	1.27768	2.1013	2.26202	3.01037	2.24649	338	4	8	6	7	6	7		1.17606	1.13034	1.44958	1.504	1.73504	1.49883
Grid	0.0530105	1.78214	0.0556046	0.0221266	0.000496316	2.39739	2.22807	1.7441	4.96574	0.0554617	0.019186	0.000374111	2.27454	1.95463	1.73613	3.8227	0.0552402	0.0171735	0.000299901	2.05774	1.43107	1.72803	2.05089			1.86489	1.20753	2.7709	3.17901	4.28763	3.69013	338	8	6	8	8	8	8		1.36561	1.09888	1.6646	1.78298	2.07066	1.92097
Peri	0.0530105	1.78214	0.049418	0.0167122	0.000292204	1.70085	1.40617	1.34056	2.17231	0.0527379	0.014252	0.000203194	1.82385	1.07789	1.55678	1.21263	0.0522711	0.0131092	0.000172398	1.68791	0.785526	1.51607	0.687844			1.09794	0.528243	1.50498	1.00845	2.46474	1.23763	338	2	2	3	2	3	4		1.04783	0.726803	1.22678	1.00421	1.56995	1.11249
Quad	0.0530105	1.78214	0.0553061	0.0172525	0.000302918	1.69288	1.3434	1.30125	2.03598	0.0547887	0.0129505	0.000170877	1.43186	1.00345	1.23741	1.30364	0.0556569	0.0106907	0.000121294	1.36207	0.507645	1.26645	0.52364			1.1382	0.495092	1.26562	1.08413	1.73413	0.942175	338	3	1	2	3	2	1		1.06687	0.703628	1.125	1.04122	1.31686	0.970657
Square	0.0530105	1.78214	0.0509362	0.0155617	0.000246469	2.63997	2.23621	2.03444	5.06429	0.0508496	0.0107481	0.000120191	2.35903	1.55803	2.02219	2.48508	0.0510456	0.00800444	6.79318e-05	2.14035	0.727803	2.01454	0.583707			0.926099	1.23149	0.890209	2.06663	0.97121	1.05025	338	1	7	1	6	1	2		0.96234	1.10973	0.943509	1.43758	0.9855	1.02482
OldEPI	0.0530105	1.78214	0.056234	0.0209067	0.000447481	1.68742	1.66816	1.26771	3.0474	0.0555727	0.0179409	0.000328441	1.46915	0.920696	1.2621	1.11812	0.0545531	0.0158945	0.000255015	1.42577	0.778502	1.27755	0.860676			1.68139	0.741039	2.43264	0.929849	3.64591	1.5486	338	7	5	7	1	7	6		1.29669	0.860836	1.55969	0.964287	1.90943	1.24443
EPI3	0.0530105	1.78214	0.0544646	0.0201149	0.000406724	1.73921	1.52366	1.30063	2.55339	0.0537961	0.0164209	0.000270263	1.54465	1.04788	1.29501	1.33535	0.0537726	0.013918	0.000194291	1.48093	0.743956	1.33204	0.756061			1.52825	0.620912	2.00174	1.1105	2.77775	1.36037	338	6	3	5	4	5	5		1.23622	0.787979	1.41483	1.0538	1.66666	1.16635
EPI5	0.0530105	1.78214	0.0544721	0.0196249	0.000387273	1.67133	1.52468	1.25002	2.6078	0.0538299	0.015706	0.00024735	1.52955	1.07547	1.30439	1.38488	0.0537202	0.0133187	0.000177891	1.50809	0.682976	1.38521	0.62401			1.45516	0.634142	1.83203	1.15169	2.54328	1.12277	338	5	4	4	5	4	3		1.2063	0.796331	1.35352	1.07317	1.59477	1.05961
			population 23
	true	true	7							15							30
	mean	rr	mean	stdev	mse	mrr	srr	prr	mse_rr	mean	stdev	mse	mrr	srr	prr	mse_rr	mean	stdev	mse	mrr	srr	prr	mse_rr
Random	0.259891	1.00799	0.261923	0.0370559	0.00137727	1.06539	0.330097	1.00278	0.108991	0.260491	0.0253607	0.000643525	1.02932	0.205508	1.00179	0.042272	0.261033	0.018966	0.000361013	1.01882	0.154309	1.00337	0.0238326
NewEPI	0.259891	1.00799	0.264575	0.0442402	0.00197913	1.04183	0.343796	0.980612	0.118945	0.263075	0.0386392	0.00150313	1.01924	0.289044	0.977295	0.0844886	0.263786	0.0359757	0.00130942	0.992354	0.227429	0.967112	0.053395			1.437	1.09133	2.33577	1.99869	3.62707	2.24042	351	3	2	2	4	2	4		1.19875	1.04467	1.52832	1.41375	1.90449	1.4968
Grid	0.259891	1.00799	0.266726	0.0486008	0.00240875	1.04206	0.432125	0.947435	0.190399	0.266563	0.0438711	0.00196919	1.02427	0.351316	0.957419	0.12598	0.266204	0.0411089	0.0017298	1.01239	0.293301	0.96542	0.0878377			1.74894	1.74692	3.06	2.98023	4.7915	3.68561	351	4	5	4	7	4	7		1.32247	1.32171	1.74929	1.72634	2.18895	1.91979
Peri	0.259891	1.00799	0.283644	0.0368455	0.0019218	1.02143	0.414656	0.946661	0.175701	0.288953	0.0314563	0.0018341	1.01971	0.246954	0.977306	0.0619278	0.28877	0.0275237	0.00159155	0.999975	0.221899	0.967365	0.0508896			1.39537	1.61206	2.85008	1.46498	4.40857	2.13529	351	2	4	3	3	3	3		1.18126	1.26967	1.68822	1.21037	2.09966	1.46126
Quad	0.259891	1.00799	0.296846	0.0361221	0.00267048	1.02357	0.328983	0.95522	0.111014	0.296453	0.0283259	0.00213914	1.00232	0.231966	0.970567	0.0552087	0.294413	0.0243818	0.00178624	1.00071	0.195496	0.978088	0.0391128			1.93897	1.01856	3.32409	1.30604	4.94785	1.64115	351	5	1	5	2	5	2		1.39247	1.00924	1.82321	1.14282	2.22438	1.28107
Square	0.259891	1.00799	0.263223	0.0360491	0.00131064	1.08066	0.350075	1.01587	0.122615	0.264494	0.0251369	0.000653051	1.04638	0.217473	1.01651	0.0473671	0.263376	0.0193433	0.000386308	1.02294	0.153698	1.00729	0.0236236			0.951622	1.125	1.0148	1.12053	1.07007	0.991229	351	1	3	1	1	1	1		0.975511	1.06066	1.00737	1.05855	1.03444	0.995605
OldEPI	0.259891	1.00799	0.297422	0.0460298	0.00352732	1.08896	0.528042	0.980724	0.279572	0.297117	0.0413987	0.00309963	1.04577	0.347838	0.975547	0.122044	0.295053	0.038286	0.00270218	1.03901	0.302821	0.986898	0.0921454			2.5611	2.56509	4.81664	2.88711	7.485	3.86636	351	8	8	8	6	8	8		1.60034	1.60159	2.19468	1.69915	2.73587	1.96631
EPI3	0.259891	1.00799	0.295522	0.0454616	0.00333633	1.07892	0.475844	0.974536	0.227547	0.294176	0.0398103	0.00276032	1.05558	0.322743	0.998576	0.104252	0.291683	0.0362468	0.00232456	1.05862	0.266482	1.02561	0.0713231			2.42242	2.08775	4.28938	2.46621	6.43899	2.99267	351	7	6	7	5	7	5		1.55641	1.44491	2.07108	1.57042	2.53752	1.72993
EPI5	0.259891	1.00799	0.292424	0.045211	0.00310243	1.122	0.506382	1.00954	0.256425	0.290773	0.0389145	0.00246804	1.08518	0.368136	1.02606	0.135851	0.287975	0.0352016	0.00202786	1.08005	0.269164	1.05044	0.0742513			2.2526	2.35271	3.83518	3.21373	5.61715	3.11553	351	6	7	6	8	6	6		1.50087	1.53386	1.95836	1.79269	2.37005	1.76509
			population 24
	true	true	7							15							30
	mean	rr	mean	stdev	mse	mrr	srr	prr	mse_rr	mean	stdev	mse	mrr	srr	prr	mse_rr	mean	stdev	mse	mrr	srr	prr	mse_rr
Random	0.030105	1.11408	0.0328004	0.0128654	0.000172784	-nan	-nan	1.00864	0.0111176	0.0331902	0.00851377	8.20026e-05	1.16645	0.763883	0.995822	0.597502	0.0331021	0.00580641	4.26969e-05	1.05279	0.402143	0.995304	0.175827
NewEPI	0.030105	1.11408	0.0298686	0.0142786	0.000203934	-nan	-nan	1.11017	1.52881e-05	0.0298541	0.0118969	0.000141599	1.40939	1.28534	1.08149	1.65316	-nan	0		-nan	-nan	-nan				1.18029	0.00137513	1.72676	2.76679	0	0	364	3	1	3	7	1	1		1.08641	0.0370827	1.31406	1.66337	0	0
Grid	0.030105	1.11408	0.0313414	0.0149324	0.000224505	-nan	-nan	1.05935	0.00299537	0.0308917	0.0122691	0.00015115	1.36494	1.18978	1.07017	1.4175	0.0308228	0.01093	0.00011998	1.22391	0.773959	1.05496	0.602508			1.29934	0.269426	1.84323	2.37238	2.81004	3.42671	364	4	2	4	6	4	8		1.13989	0.519063	1.35766	1.54025	1.67632	1.85114
Peri	0.030105	1.11408	0.0301752	0.0121059	0.000146558	-nan	-nan	1.28532	0.0293231	0.0334876	0.00958775	0.000103367	2.02837	1.45547	1.61436	2.36867	0.0337665	0.00797626	7.70272e-05	1.42493	0.599137	1.29647	0.392231			0.848215	2.63754	1.26053	3.96429	1.80405	2.23078	364	1	4	2	8	3	6		0.920986	1.62405	1.12273	1.99105	1.34315	1.49358
Quad	0.030105	1.11408	0.0446061	0.0142127	0.000412283	1.27226	1.15995	1.01296	1.35571	0.044418	0.0117491	0.000342903	1.1162	0.575122	1.00807	0.342003	0.0439966	0.00933918	0.000280197	1.05484	0.39659	0.990508	0.172554			2.38612	121.943	4.18161	0.572389	6.56246	0.981385	364	5	5	5	1	5	3		1.54471	11.0428	2.0449	0.756564	2.56173	0.990649
Square	0.030105	1.11408	0.0338527	0.0125835	0.00017239	1.2547	1.21277	0.975798	1.48993	0.0337243	0.00906785	9.53252e-05	1.15185	0.713313	1.01392	0.518847	0.0338855	0.00631433	5.41628e-05	1.05998	0.39015	1.00688	0.163709			0.99772	134.016	1.16247	0.868361	1.26854	0.931081	364	2	8	1	2	2	2		0.998859	11.5765	1.07818	0.931859	1.1263	0.964925
OldEPI	0.030105	1.11408	0.0443647	0.0175063	0.00050981	1.23931	1.17375	0.966944	1.39934	0.0443009	0.0149751	0.000425777	1.14036	0.760996	0.96751	0.600598	0.0435376	0.0132521	0.000356053	1.09868	0.739255	0.981965	0.563952			2.95057	125.867	5.19224	1.00518	8.33908	3.20743	364	7	7	8	5	7	7		1.71772	11.219	2.27865	1.00259	2.88775	1.79093
EPI3	0.030105	1.11408	0.044382	0.0176996	0.000517109	-nan	-nan	0.982634	0.0172781	0.0434527	0.0149927	0.000402942	1.17619	0.751545	1.00468	0.576788	0.0438244	0.0132522	0.000363843	1.14747	0.537786	1.03765	0.295055			2.99281	1.55412	4.91377	0.965332	8.52152	1.6781	364	8	3	7	3	8	4		1.72997	1.24664	2.2167	0.982513	2.91917	1.29542
EPI5	0.030105	1.11408	0.0434053	0.0176026	0.000486749	1.22818	1.16655	0.955695	1.38592	0.0433771	0.0145374	0.000387485	1.18768	0.754668	1.00909	0.580547	0.0429697	0.0132605	0.000341341	1.14209	0.54325	1.02628	0.302829			2.8171	124.66	4.72527	0.971623	7.99452	1.72232	364	6	6	6	4	6	5		1.67842	11.1651	2.17377	0.985709	2.82746	1.31237
			population 25
	true	true	7							15							30
	mean	rr	mean	stdev	mse	mrr	srr	prr	mse_rr	mean	stdev	mse	mrr	srr	prr	mse_rr	mean	stdev	mse	mrr	srr	prr	mse_rr
Random	0.044612	1.16899	0.045736	0.0151403	0.000230492	1.53423	1.25716	1.14593	1.58098	0.0455923	0.0103904	0.000108921	1.33654	0.89311	1.11731	0.800316	0.0455994	0.00715868	5.22215e-05	1.20248	0.450932	1.11156	0.206638
NewEPI	0.044612	1.16899	0.0437219	0.0183471	0.000337408	-nan	-nan	1.14706	0.000480925	0.0439585	0.0156588	0.000245625	1.52102	1.36934	1.12636	1.87691	0.0445419	0.0141347	0.000199795	1.41292	1.20545	1.15447	1.45332			1.46386	0.000304194	2.25507	2.34521	3.82591	7.03318	377	2	1	2	4	2	5		1.2099	0.0174411	1.50169	1.53141	1.95599	2.65201
Grid	0.044612	1.16899	0.0448522	0.0201724	0.000406983	-nan	-nan	1.09863	0.00495053	0.0445916	0.0170128	0.000289436	1.44464	1.361	1.07124	1.86188	0.044062	0.0150942	0.000228137	1.28053	0.8459	1.08723	0.722232			1.76572	0.0031313	2.65729	2.32643	4.36865	3.49516	377	3	2	3	3	3	3		1.3288	0.055958	1.63012	1.52526	2.09013	1.86953
Peri	0.044612	1.16899	0.0628607	0.0191813	0.000700937	2.30485	1.74076	1.79683	3.42443	0.0652605	0.0155055	0.000666781	2.51466	1.90031	1.95611	4.23074	0.0653854	0.0126091	0.000590523	2.43181	1.93029	1.99369	4.40615			3.04105	2.16601	6.12168	5.28633	11.3081	21.323	377	6	8	8	8	8	8		1.74386	1.47174	2.4742	2.2992	3.36274	4.61769
Quad	0.044612	1.16899	0.058676	0.0197155	0.000586497	1.73127	1.33309	1.33194	1.80368	0.0567557	0.0148851	0.000369036	1.71856	1.28279	1.35369	1.67966	0.0570919	0.013156	0.000328828	1.5861	0.74827	1.40461	0.615425			2.54454	1.14086	3.38809	2.09875	6.2968	2.97828	377	4	6	4	2	4	2		1.59516	1.06811	1.84068	1.44871	2.50934	1.72577
Square	0.044612	1.16899	0.0445864	0.0148351	0.000220081	1.49379	1.32443	1.09179	1.76007	0.0454759	0.0105934	0.000112966	1.32702	0.946118	1.1041	0.89935	0.0447198	0.00746741	5.57738e-05	1.19773	0.43097	1.114	0.188759			0.954831	1.11328	1.03714	1.12374	1.06802	0.913477	377	1	5	1	1	1	1		0.977154	1.05512	1.0184	1.06007	1.03345	0.95576
OldEPI	0.044612	1.16899	0.0571276	0.0250784	0.000785566	-nan	-nan	1.42136	0.0636906	0.0571332	0.0224389	0.000660285	1.99224	1.94807	1.42637	3.86122	0.0563268	0.0205268	0.000558586	1.77061	1.47888	1.45721	2.27016			3.40822	0.0402855	6.06203	4.82462	10.6965	10.9862	377	8	3	7	7	7	7		1.84614	0.200712	2.46212	2.1965	3.27055	3.31454
EPI3	0.044612	1.16899	0.057602	0.024024	0.000745893	1.83428	1.67037	1.36458	2.82839	0.0558034	0.0213398	0.000580634	1.86703	1.53698	1.44668	2.43942	0.0554156	0.019023	0.000478592	1.64277	1.25838	1.42131	1.64719			3.23609	1.78901	5.33077	3.04807	9.16466	7.97136	377	7	7	6	6	6	6		1.79891	1.33754	2.30885	1.74587	3.02732	2.82336
EPI5	0.044612	1.16899	0.0562996	0.0236685	0.000696798	-nan	-nan	1.45551	0.0820937	0.0559977	0.021123	0.000575815	1.84787	1.48961	1.46727	2.30791	0.0537641	0.0172222	0.000380365	1.62793	1.00777	1.44207	1.09017			3.02309	0.0519257	5.28653	2.88375	7.28369	5.27577	377	5	4	5	5	5	4		1.7387	0.227872	2.29924	1.69816	2.69883	2.2969
			population 26
	true	true	7							15							30
	mean	rr	mean	stdev	mse	mrr	srr	prr	mse_rr	mean	stdev	mse	mrr	srr	prr	mse_rr	mean	stdev	mse	mrr	srr	prr	mse_rr
Random	0.133645	1.03244	0.13688	0.0231306	0.00054549	1.15699	0.498539	1.04176	0.248628	0.137236	0.016314	0.000279042	1.07109	0.28418	1.0238	0.0808329	0.137837	0.0119181	0.000159614	1.05901	0.190054	1.03689	0.0361403
NewEPI	0.133645	1.03244	0.137998	0.0251644	0.000652196	1.19566	0.560671	1.06015	0.31512	0.13826	0.0195289	0.000402676	1.1022	0.355907	1.03507	0.126677	0.136985	0.0160631	0.000269179	1.08319	0.235859	1.048	0.0558716			1.19561	1.26743	1.44307	1.56714	1.68644	1.54596	390	2	8	2	8	3	8		1.09344	1.1258	1.20128	1.25186	1.29863	1.24337
Grid	0.133645	1.03244	0.14156	0.0269519	0.000789052	1.15635	0.455616	1.0586	0.20827	0.140499	0.0208199	0.000480445	1.09651	0.291919	1.04744	0.0854417	0.140116	0.017198	0.000337645	1.07308	0.216053	1.04505	0.0468379			1.4465	0.837678	1.72177	1.05702	2.11539	1.296	390	4	2	4	3	5	3		1.20271	0.915248	1.31216	1.02811	1.45444	1.13842
Peri	0.133645	1.03244	0.151933	0.0250972	0.00096432	1.27661	0.518119	1.16134	0.285063	0.151183	0.018053	0.000633492	1.17578	0.302263	1.13067	0.101012	0.148347	0.0138541	0.000408085	1.13765	0.218684	1.11095	0.0539865			1.76781	1.14654	2.27024	1.24964	2.5567	1.4938	390	8	7	8	6	7	6		1.32959	1.07077	1.50673	1.11787	1.59897	1.22221
Quad	0.133645	1.03244	0.150012	0.0247064	0.000878285	1.11082	0.4383	1.01874	0.192295	0.150373	0.0178137	0.000597154	1.0475	0.253629	1.01116	0.0647805	0.148703	0.013422	0.000406893	1.04035	0.175229	1.0213	0.0308293			1.61008	0.773423	2.14002	0.801412	2.54923	0.853044	390	6	1	6	1	6	1		1.26889	0.879445	1.46288	0.895216	1.59663	0.923604
Square	0.133645	1.03244	0.140064	0.0238806	0.000611487	1.14918	0.470291	1.04536	0.221341	0.139901	0.0170012	0.000328178	1.08164	0.273399	1.03769	0.0747746	0.141164	0.0122343	0.000206213	1.06782	0.186267	1.04599	0.034879			1.12099	0.890248	1.17609	0.925051	1.29195	0.965099	390	1	4	1	2	1	2		1.05877	0.943529	1.08448	0.961796	1.13664	0.982395
OldEPI	0.133645	1.03244	0.14947	0.0262029	0.000937022	1.11292	0.466981	1.01635	0.21833	0.148179	0.0201629	0.00061778	1.06593	0.304113	1.01577	0.0927626	0.146986	0.015519	0.000418822	1.04308	0.228172	1.01179	0.0524889			1.71776	0.87814	2.21393	1.14758	2.62397	1.45236	390	7	3	7	5	8	5		1.31063	0.937091	1.48793	1.07125	1.61987	1.20514
EPI3	0.133645	1.03244	0.14795	0.0247487	0.000817131	1.12597	0.518821	1.0131	0.269549	0.146229	0.0183789	0.000496141	1.07752	0.323027	1.02072	0.104484	0.143481	0.0149581	0.000320492	1.08775	0.225931	1.05697	0.0516465			1.49798	1.08415	1.77802	1.29259	2.00792	1.42906	390	5	6	5	7	4	4		1.22392	1.04122	1.33342	1.13692	1.41701	1.19543
EPI5	0.133645	1.03244	0.145128	0.0246278	0.000738388	1.12417	0.474126	1.01972	0.224957	0.143077	0.0183985	0.000427467	1.08847	0.29809	1.03896	0.0889002	0.140901	0.0143213	0.000257749	1.09889	0.230095	1.06881	0.0542665			1.35362	0.904795	1.53191	1.0998	1.61483	1.50155	390	3	5	3	4	2	7		1.16345	0.951207	1.2377	1.04871	1.27076	1.22538
			population 27
	true	true	7							15							30
	mean	rr	mean	stdev	mse	mrr	srr	prr	mse_rr	mean	stdev	mse	mrr	srr	prr	mse_rr	mean	stdev	mse	mrr	srr	prr	mse_rr
Random	0.0637684	0.959422	0.062707	0.0169919	0.000289851	0.800993	0.44457	0.820285	0.217002	0.0623376	0.011156	0.000126503	1.05712	0.688147	0.833825	0.489321	0.0629422	0.00822717	6.83689e-05	1.0538	0.679049	0.84614	0.47394
NewEPI	0.0637684	0.959422	0.0628213	0.0171284	0.000294279	0.782696	0.454633	0.804499	0.230692	0.0630869	0.012538	0.000157666	1.12987	0.786305	0.845122	0.63134	0.0626864	0.0102952	0.000107162	1.16995	0.953811	0.842614	0.9234			1.01528	1.06309	1.24634	1.29024	1.56741	1.94835	403	4	2	4	3	7	8		1.00761	1.03106	1.11639	1.13589	1.25196	1.39583
Grid	0.0637684	0.959422	0.0613381	0.0173824	0.000308054	1.08709	0.806138	0.894373	0.65409	0.0614	0.0133897	0.000184893	1.17331	0.890991	0.899675	0.797435	0.0611852	0.0104326	0.000115512	1.12882	0.769965	0.900308	0.596341			1.0628	3.01422	1.46157	1.62968	1.68954	1.25826	403	7	6	8	5	8	4		1.03092	1.73615	1.20895	1.27659	1.29982	1.12172
Peri	0.0637684	0.959422	0.0593584	0.016855	0.000303539	1.02628	0.741105	0.840706	0.56333	0.0641531	0.0129951	0.000169021	1.24523	0.952371	0.944714	0.907227	0.0601772	0.00955348	0.000104166	1.08729	0.711506	0.888059	0.511333			1.04722	2.59597	1.33609	1.85405	1.52358	1.0789	403	6	4	6	7	5	3		1.02334	1.6112	1.1559	1.36164	1.23433	1.0387
Quad	0.0637684	0.959422	0.0622935	0.0163663	0.000270031	1.03761	0.741281	0.866205	0.558187	0.0622993	0.0118112	0.000141663	1.09856	0.688663	0.880515	0.480483	0.0618193	0.00861951	7.80948e-05	1.03496	0.584115	0.882701	0.347076			0.93162	2.57227	1.11983	0.981939	1.14226	0.732321	403	2	3	2	2	2	1		0.965204	1.60383	1.05822	0.990928	1.06876	0.855758
Square	0.0637684	0.959422	0.0618669	0.01613	0.000263793	0.792787	0.433965	0.798473	0.21423	0.0613721	0.0113352	0.000134229	1.02338	0.668258	0.801279	0.471578	0.0607768	0.00830319	7.78925e-05	0.979256	0.654508	0.779914	0.460604			0.910097	0.987229	1.06107	0.96374	1.1393	0.97186	403	1	1	1	1	1	2		0.95399	0.993594	1.03008	0.981702	1.06738	0.98583
OldEPI	0.0637684	0.959422	0.0617112	0.0170571	0.000295177	1.07033	0.766918	0.934125	0.588803	0.0613674	0.013103	0.000177453	1.25963	1.0074	0.943737	1.0151	0.0610128	0.00985131	0.000104642	1.16588	0.876958	0.922292	0.770434			1.01837	2.71336	1.40276	2.07451	1.53054	1.62559	403	5	5	7	8	6	7		1.00914	1.64723	1.18438	1.44032	1.23715	1.27499
EPI3	0.0637684	0.959422	0.0615305	0.0176177	0.000315391	1.07142	0.825265	0.893307	0.685434	0.0615284	0.0124777	0.000160711	1.16025	0.873748	0.895616	0.767507	0.0607049	0.00925974	9.51277e-05	1.16097	0.808404	0.93516	0.654106			1.08812	3.15866	1.2704	1.56851	1.39139	1.38014	403	8	8	5	4	4	6		1.04313	1.77726	1.12712	1.2524	1.17957	1.1748
EPI5	0.0637684	0.959422	0.0613141	0.0165723	0.000280665	1.09964	0.817454	0.898627	0.671927	0.060854	0.0120598	0.000153932	1.24349	0.905266	0.943729	0.819753	0.0608838	0.00925592	9.39929e-05	1.18767	0.804798	0.950208	0.647785			0.968306	3.09642	1.21682	1.67529	1.37479	1.36681	403	3	7	3	6	3	5		0.984025	1.75966	1.1031	1.29433	1.17251	1.1691
			population 28
	true	true	7							15							30
	mean	rr	mean	stdev	mse	mrr	srr	prr	mse_rr	mean	stdev	mse	mrr	srr	prr	mse_rr	mean	stdev	mse	mrr	srr	prr	mse_rr
Random	0.163287	1.04105	0.165479	0.025796	0.000670238	1.08161	0.377896	1.00747	0.143933	0.167095	0.017841	0.000332802	1.03646	0.225162	1.00699	0.051858	0.167025	0.0127405	0.000176293	1.02696	0.155977	1.01191	0.025178
NewEPI	0.163287	1.04105	0.166844	0.0302599	0.000928314	1.08987	0.493056	0.983383	0.24643	0.164419	0.023614	0.000558902	1.09482	0.34513	1.02824	0.119279	-nan	0		-nan	-nan	-nan				1.38505	1.71211	1.67938	2.3001	0	0	416	8	7	7	8	1	1		1.17688	1.30848	1.29591	1.51661	0	0
Grid	0.163287	1.04105	0.166882	0.0301302	0.000920753	1.12012	0.559828	0.997273	0.315324	0.16739	0.0243434	0.000609436	1.05194	0.337097	0.987118	0.116543	0.16591	0.0201824	0.000414209	1.03943	0.235953	1.00279	0.0571376			1.37377	2.19077	1.83123	2.24735	2.34955	2.26935	416	7	8	8	7	8	8		1.17208	1.48012	1.35323	1.49912	1.53282	1.50644
Peri	0.163287	1.04105	0.168504	0.0267802	0.000744396	1.04052	0.420633	0.95987	0.183522	0.167286	0.0221405	0.000506194	0.967949	0.273936	0.92133	0.0893738	0.17057	0.0180298	0.000378116	1.0046	0.207007	0.974234	0.0473163			1.11064	1.27505	1.52101	1.72343	2.14481	1.87927	416	2	3	5	5	7	6		1.05387	1.12918	1.23329	1.3128	1.46452	1.37087
Quad	0.163287	1.04105	0.173012	0.0268542	0.000815724	1.04397	0.409311	0.959725	0.174149	0.172167	0.0192112	0.000447925	0.983255	0.243965	0.94462	0.0688177	0.172288	0.0151445	0.000310374	0.973978	0.186927	0.948488	0.0435094			1.21706	1.20993	1.34592	1.32704	1.76056	1.72808	416	4	2	2	2	5	5		1.10321	1.09997	1.16014	1.15197	1.32686	1.31456
Square	0.163287	1.04105	0.169053	0.0256062	0.000688924	1.10799	0.386176	1.03528	0.149165	0.167644	0.0178559	0.000337817	1.06375	0.246157	1.03082	0.0606979	0.16895	0.0125465	0.000189484	1.04533	0.159038	1.03041	0.0254063			1.02788	1.03635	1.01507	1.17046	1.07483	1.00907	416	1	1	1	1	2	2		1.01384	1.01801	1.00751	1.08188	1.03674	1.00452
OldEPI	0.163287	1.04105	0.171493	0.0291599	0.000917638	1.03723	0.472859	0.934593	0.234929	0.169653	0.0227179	0.000556629	1.00485	0.320171	0.944432	0.111845	0.167954	0.0184953	0.000363857	1.01436	0.216236	0.982268	0.0502133			1.36912	1.63221	1.67255	2.15675	2.06393	1.99434	416	6	4	6	6	6	7		1.17009	1.27758	1.29327	1.46859	1.43664	1.41221
EPI3	0.163287	1.04105	0.168345	0.0288779	0.000859516	1.07437	0.481986	0.966761	0.237829	0.165605	0.0212898	0.000458629	1.06156	0.294476	1.01043	0.0876537	0.164585	0.0162094	0.000264429	1.0726	0.206023	1.04798	0.0424935			1.2824	1.65236	1.37808	1.69026	1.49994	1.68773	416	5	5	4	4	3	4		1.13243	1.28544	1.17392	1.3001	1.22472	1.29913
EPI5	0.163287	1.04105	0.164894	0.0282136	0.00079859	1.12468	0.491113	1.0185	0.2417	0.164193	0.0211878	0.000449744	1.09561	0.293721	1.04707	0.0863083	0.163129	0.0164435	0.000270414	1.07689	0.195081	1.05514	0.0382551			1.1915	1.67926	1.35138	1.66432	1.53389	1.51939	416	3	6	3	3	4	3		1.09156	1.29586	1.16249	1.29008	1.2385	1.23264
			population 29
	true	true	7							15							30
	mean	rr	mean	stdev	mse	mrr	srr	prr	mse_rr	mean	stdev	mse	mrr	srr	prr	mse_rr	mean	stdev	mse	mrr	srr	prr	mse_rr
Random	0.213939	1.15534	0.213673	0.0338894	0.00114856	1.27487	0.462137	1.183	0.214336	0.211716	0.0238968	0.000575999	1.22124	0.286463	1.17917	0.0826289	0.214006	0.0172242	0.000296677	1.19964	0.200683	1.17769	0.0407732
NewEPI	0.213939	1.15534	0.21223	0.0410701	0.00168967	1.32466	0.574073	1.20335	0.331865	0.209684	0.0360934	0.00132084	1.23871	0.394249	1.17109	0.15568	0.211262	0.0325675	0.00106781	1.22754	0.338974	1.18108	0.115566			1.47112	1.54834	2.29313	1.88409	3.59922	2.83436	429	2	3	2	3	2	4		1.2129	1.24432	1.51431	1.37262	1.89716	1.68356
Grid	0.213939	1.15534	0.227101	0.0470127	0.00238343	1.31134	0.689978	1.14114	0.476271	0.22709	0.0421179	0.00194687	1.25819	0.497571	1.15457	0.247577	0.226366	0.0385646	0.00164166	1.23288	0.39318	1.1706	0.154823			2.07514	2.22208	3.37998	2.99626	5.53348	3.79719	429	4	6	4	6	4	7		1.44054	1.49066	1.83847	1.73097	2.35234	1.94864
Peri	0.213939	1.15534	0.247254	0.0363119	0.00242844	1.40792	0.633729	1.26281	0.413162	0.25048	0.0321365	0.002368	1.34805	0.527565	1.26371	0.290069	0.249586	0.0274916	0.0020265	1.32296	0.316768	1.27644	0.115007			2.11433	1.92764	4.11112	3.5105	6.83064	2.82066	429	5	5	6	7	5	3		1.45407	1.3884	2.02759	1.87363	2.61355	1.67948
Quad	0.213939	1.15534	0.240807	0.036862	0.0020807	1.35342	0.544313	1.22768	0.30151	0.241497	0.0271251	0.00149521	1.27001	0.344594	1.21049	0.121787	0.241343	0.0238054	0.00131768	1.24239	0.267947	1.20479	0.0742409			1.81157	1.40672	2.59586	1.4739	4.44144	1.82083	429	3	2	3	2	3	2		1.34594	1.18605	1.61117	1.21404	2.10747	1.34938
Square	0.213939	1.15534	0.217664	0.0340328	0.00117211	1.30397	0.459108	1.20764	0.213515	0.21744	0.023927	0.000584758	1.26873	0.298828	1.22189	0.0937271	0.217295	0.0174319	0.000315134	1.24132	0.202088	1.21931	0.0449317			1.0205	0.996173	1.01521	1.13431	1.06221	1.10199	429	1	1	1	1	1	1		1.0102	0.998085	1.00758	1.06504	1.03064	1.04976
OldEPI	0.213939	1.15534	0.239948	0.0465909	0.00284718	1.41745	0.736058	1.22659	0.546858	0.240369	0.0424085	0.00249703	1.33926	0.553165	1.22305	0.310576	0.241161	0.0399609	0.00233791	1.30048	0.42916	1.22796	0.189452			2.47891	2.55141	4.33512	3.75869	7.88031	4.64648	429	7	8	8	8	8	8		1.57445	1.59731	2.0821	1.93873	2.80719	2.15557
EPI3	0.213939	1.15534	0.242065	0.0462561	0.0029307	1.36538	0.626796	1.21845	0.396856	0.242583	0.0408069	0.00248568	1.32453	0.459109	1.24239	0.218359	0.244348	0.0369164	0.00228753	1.295	0.356501	1.24819	0.135714			2.55162	1.85156	4.31543	2.64264	7.71049	3.32851	429	8	4	7	5	7	6		1.59738	1.36072	2.07736	1.62562	2.77678	1.82442
EPI5	0.213939	1.15534	0.240235	0.0430213	0.00254231	1.3869	0.690772	1.2188	0.481193	0.243621	0.038366	0.00235297	1.31396	0.438426	1.23835	0.199108	0.244078	0.0351144	0.00214138	1.30116	0.34423	1.25809	0.129052			2.21347	2.24504	4.08503	2.40967	7.21787	3.16512	429	6	7	5	4	6	5		1.48777	1.49835	2.02115	1.55231	2.68661	1.77908
			population 30
	true	true	7							15							30
	mean	rr	mean	stdev	mse	mrr	srr	prr	mse_rr	mean	stdev	mse	mrr	srr	prr	mse_rr	mean	stdev	mse	mrr	srr	prr	mse_rr
Random	0.0420206	1.3425	0.0423655	0.0144525	0.000208994	1.66422	1.55252	1.32763	2.41054	0.0421078	0.00999812	9.997e-05	1.45951	0.763143	1.33764	0.582411	0.0424781	0.00706692	5.01506e-05	1.37857	0.473304	1.32124	0.224469
NewEPI	0.0420206	1.3425	0.0416039	0.015637	0.000244689	1.59804	1.36967	1.27404	1.88068	0.0440146	0.0136819	0.00019117	1.58073	0.980754	1.42369	0.96847	0.0460022	-nan	1.58531e-05	1.16384	0	1.16384	0.0319194			1.1708	0.780192	1.91228	1.66286	0.31611	0.1422	442	3	7	5	8	1	1		1.08203	0.883285	1.38285	1.28952	0.562236	0.377094
Grid	0.0420206	1.3425	0.0433545	0.0177384	0.00031643	-nan	-nan	1.33792	2.09764e-05	0.0431212	0.0144411	0.000209757	1.53737	0.916849	1.3624	0.841008	0.0446268	0.0119746	0.000150183	1.45977	0.612609	1.37526	0.376363			1.51407	8.70195e-06	2.0982	1.44401	2.99464	1.67668	442	6	1	6	7	7	8		1.23047	0.00294991	1.44851	1.20167	1.7305	1.29487
Peri	0.0420206	1.3425	0.0430513	0.0137186	0.000189262	1.49928	1.20002	1.21898	1.45531	0.0436318	0.0115305	0.000135548	1.19731	0.595348	1.10053	0.412989	0.0413726	0.00899785	8.13812e-05	1.04568	0.391104	1.00845	0.264552			0.905588	0.603726	1.35589	0.709102	1.62274	1.17857	442	1	3	2	1	3	4		0.951624	0.776998	1.16443	0.842082	1.27387	1.08562
Quad	0.0420206	1.3425	0.0471802	0.0152062	0.00025785	1.61165	1.3045	1.32295	1.7021	0.0467449	0.0109013	0.000141157	1.4047	0.650299	1.29226	0.425413	0.0455576	0.00841223	8.32759e-05	1.25336	0.433494	1.20699	0.20628			1.23377	0.706109	1.412	0.730434	1.66052	0.91897	442	4	6	3	2	4	2		1.11075	0.840303	1.18827	0.854654	1.28861	0.958629
Square	0.0420206	1.3425	0.0414508	0.0139394	0.000194631	1.65114	1.4697	1.33596	2.16006	0.0430877	0.0101753	0.000104675	1.40564	0.72855	1.29726	0.532832	0.0432193	0.00726145	5.41654e-05	1.38308	0.463999	1.32663	0.215547			0.931279	0.89609	1.04707	0.914873	1.08005	0.960254	442	2	8	1	4	2	3		0.965028	0.94662	1.02326	0.95649	1.03926	0.979925
OldEPI	0.0420206	1.3425	0.0486164	0.0183962	0.000381925	1.50226	1.28632	1.23338	1.66653	0.0485873	0.0148381	0.000263291	1.39936	0.710682	1.28523	0.508349	0.045583	0.0123285	0.000164682	1.36887	0.524676	1.30912	0.276399			1.82745	0.69135	2.6337	0.872835	3.28376	1.23135	442	7	4	8	3	8	5		1.35183	0.831475	1.62287	0.934257	1.81211	1.10966
EPI3	0.0420206	1.3425	0.0491539	0.0189946	0.000411679	-nan	-nan	1.33716	2.85156e-05	0.0475685	0.013796	0.000221109	1.61853	0.855904	1.46981	0.748779	0.0439286	0.0100606	0.000104856	1.49554	0.555558	1.42547	0.315529			1.96981	1.18296e-05	2.21175	1.28566	2.09082	1.40567	442	8	2	7	6	6	7		1.4035	0.00343941	1.4872	1.13387	1.44597	1.18561
EPI5	0.0420206	1.3425	0.0473283	0.0159079	0.000281233	1.67666	1.30042	1.39788	1.69416	0.0451092	0.0126096	0.000168541	1.51652	0.738594	1.3981	0.548612	0.0443409	0.00969602	9.93965e-05	1.48045	0.521639	1.41544	0.277427			1.34565	0.702813	1.68592	0.941968	1.98196	1.23593	442	5	5	4	5	5	6		1.16002	0.83834	1.29843	0.97055	1.40782	1.11172
			population 31
	true	true	7							15							30
	mean	rr	mean	stdev	mse	mrr	srr	prr	mse_rr	mean	stdev	mse	mrr	srr	prr	mse_rr	mean	stdev	mse	mrr	srr	prr	mse_rr
Random	0.450332	1.10897	0.447856	0.0390205	0.00152873	1.16289	0.208917	1.14085	0.0446626	0.448137	0.0285544	0.000820172	1.15241	0.136573	1.14168	0.0197221	0.449144	0.0190621	0.000364775	1.15227	0.0991843	1.14687	0.0112739
NewEPI	0.450332	1.10897	0.446557	0.0550518	0.00304495	1.16491	0.249234	1.13458	0.0627735	0.4496	0.047728	0.0022785	1.15725	0.211713	1.13522	0.0455115	0.446179	0.0475492	0.00227817	1.14115	0.183268	1.12568	0.0338664			1.99182	1.4055	2.77807	2.30763	6.24542	3.00395	455	2	8	2	7	2	7		1.41132	1.18554	1.66676	1.51909	2.49908	1.73319
Grid	0.450332	1.10897	0.485707	0.0565759	0.00445222	1.16746	0.24392	1.13579	0.0602163	0.486787	0.052211	0.00405496	1.16443	0.214857	1.14078	0.0471754	0.48505	0.0494821	0.00365382	1.16277	0.190798	1.14373	0.0376121			2.91237	1.34825	4.94403	2.392	10.0166	3.3362	455	3	7	3	8	3	8		1.70657	1.16114	2.22352	1.54661	3.16491	1.82653
Peri	0.450332	1.10897	0.507988	0.0411422	0.00501689	1.13488	0.176419	1.11677	0.0311845	0.507604	0.0347314	0.00448635	1.10648	0.132627	1.09679	0.0177383	0.510268	0.0308384	0.00454333	1.10641	0.112092	1.09914	0.0126612			3.28174	0.698223	5.47002	0.89941	12.4552	1.12305	455	4	2	4	2	4	3		1.81156	0.835598	2.33881	0.948372	3.52919	1.05974
Quad	0.450332	1.10897	0.518666	0.0393715	0.00621965	1.1301	0.167708	1.11388	0.0281501	0.518269	0.0305525	0.00554889	1.13189	0.124348	1.12287	0.0156556	0.520213	0.0278545	0.00565923	1.1216	0.101946	1.11577	0.0104392			4.06851	0.630282	6.76552	0.793811	15.5143	0.925961	455	5	1	5	1	6	1		2.01705	0.793903	2.60106	0.890961	3.93882	0.962269
Square	0.450332	1.10897	0.465554	0.039548	0.00179575	1.17095	0.205476	1.14839	0.0437743	0.4671	0.0295029	0.00115159	1.16268	0.133222	1.15203	0.0196023	0.465701	0.019963	0.000634727	1.16321	0.0973702	1.15767	0.0118526			1.17467	0.98011	1.40408	0.993922	1.74005	1.05133	455	1	5	1	3	1	2		1.08382	0.990005	1.18494	0.996957	1.31911	1.02534
OldEPI	0.450332	1.10897	0.521698	0.052957	0.00789755	1.12958	0.216551	1.10488	0.0469111	0.521026	0.0476876	0.00727175	1.11841	0.174967	1.10241	0.0306565	0.518762	0.0446828	0.00667922	1.12445	0.157982	1.11174	0.024966			5.16609	1.05034	8.86613	1.55442	18.3105	2.21449	455	8	6	8	6	8	6		2.2729	1.02486	2.9776	1.24676	4.27908	1.48812
EPI3	0.450332	1.10897	0.517576	0.0518444	0.0072096	1.13643	0.204894	1.11502	0.0420182	0.516524	0.0465615	0.00654935	1.11719	0.170786	1.10256	0.0292089	0.517615	0.0425991	0.00634169	1.13332	0.156784	1.12155	0.0247395			4.71607	0.94079	7.98535	1.48102	17.3852	2.1944	455	7	4	7	5	7	5		2.17165	0.969943	2.82584	1.21697	4.16956	1.48135
EPI5	0.450332	1.10897	0.517353	0.0501202	0.00700385	1.12943	0.203165	1.10878	0.0412761	0.515243	0.044548	0.00619796	1.12672	0.162864	1.11391	0.0265491	0.509186	0.0406236	0.00511407	1.13486	0.154918	1.12401	0.0242258			4.58148	0.924174	7.55691	1.34616	14.0198	2.14883	455	6	3	6	4	5	4		2.14044	0.96134	2.74898	1.16024	3.7443	1.46589
			population 32
	true	true	7							15							30
	mean	rr	mean	stdev	mse	mrr	srr	prr	mse_rr	mean	stdev	mse	mrr	srr	prr	mse_rr	mean	stdev	mse	mrr	srr	prr	mse_rr
Random	0.117848	1.09247	0.120171	0.0232928	0.000547951	1.20765	0.714541	1.04767	0.512576	0.119522	0.0155472	0.000244518	1.14246	0.382422	1.06676	0.146908	0.12008	0.0117771	0.000143682	1.10651	0.231109	1.0742	0.0537452
NewEPI	0.117848	1.09247	0.119949	0.0261127	0.000686287	1.30781	0.771014	1.1048	0.594615	0.121346	0.0216668	0.000481686	1.21481	0.463992	1.10873	0.215553	0.120149	0.018699	0.000354947	1.17765	0.345256	1.11471	0.119696			1.25246	1.16005	1.96994	1.46727	2.47037	2.22711	468	6	4	6	4	6	5		1.11913	1.07706	1.40355	1.21131	1.57174	1.49235
Grid	0.117848	1.09247	0.112311	0.0261949	0.000716831	1.30993	1.09734	1.05438	1.20561	0.113311	0.0222203	0.000514326	1.1828	0.567133	1.05544	0.323011	0.113924	0.0190676	0.000378971	1.11494	0.379575	1.0465	0.14619			1.3082	2.35205	2.10343	2.19874	2.63757	2.72007	468	8	8	8	7	8	8		1.14377	1.53364	1.45032	1.48281	1.62406	1.64926
Peri	0.117848	1.09247	0.122052	0.0230343	0.000548253	1.46209	0.908477	1.22615	0.843201	0.117054	0.0188675	0.000356613	1.25242	0.45737	1.15058	0.212564	0.115035	0.0156317	0.000252263	1.19882	0.353271	1.1366	0.126748			1.00055	1.64503	1.45843	1.44692	1.75571	2.35831	468	3	7	3	3	3	7		1.00028	1.28259	1.20766	1.20288	1.32503	1.53568
Quad	0.117848	1.09247	0.109827	0.0215536	0.000528894	1.21634	0.796998	1.01368	0.641414	0.109783	0.0165816	0.000339994	1.12115	0.440023	1.02885	0.197668	0.109219	0.0125598	0.000232208	1.06512	0.295516	1.01602	0.0931743			0.965222	1.25135	1.39047	1.34552	1.61613	1.73363	468	1	5	2	2	2	2		0.982457	1.11864	1.17918	1.15997	1.27127	1.31667
Square	0.117848	1.09247	0.115285	0.0231012	0.000540234	1.14738	0.550953	1.00829	0.310635	0.11562	0.0162885	0.000270279	1.09616	0.362257	1.0261	0.135635	0.116457	0.0120244	0.000146521	1.04201	0.212421	1.01377	0.0513164			0.985918	0.606028	1.10536	0.923268	1.01976	0.954809	468	2	1	1	1	1	1		0.992934	0.778478	1.05136	0.960868	1.00983	0.977143
OldEPI	0.117848	1.09247	0.109346	0.02525	0.000709847	1.27098	0.896824	1.01597	0.810146	0.109987	0.0208617	0.000497006	1.13996	0.465436	1.02726	0.220883	0.109871	0.0177064	0.000377149	1.09006	0.340673	1.02422	0.120716			1.29546	1.58054	2.0326	1.50355	2.62489	2.24608	468	7	6	7	5	7	6		1.13818	1.25719	1.42569	1.22619	1.62015	1.49869
EPI3	0.117848	1.09247	0.108895	0.0245674	0.000683713	1.21009	0.724089	1.01239	0.530718	0.109227	0.0197	0.000462412	1.14001	0.639491	1.01592	0.414809	0.109768	0.0169069	0.00035113	1.07298	0.310464	1.01662	0.102141			1.24776	1.03539	1.89112	2.8236	2.4438	1.90047	468	5	2	5	8	5	3		1.11703	1.01754	1.37518	1.68036	1.56327	1.37858
EPI5	0.117848	1.09247	0.109782	0.0235549	0.000619894	1.23484	0.76766	1.03396	0.592725	0.110707	0.0196427	0.000436829	1.12156	0.47085	1.01983	0.226976	0.110054	0.0158157	0.000310883	1.081	0.324793	1.0238	0.110206			1.13129	1.15637	1.78649	1.54503	2.16369	2.05053	468	4	3	4	6	4	4		1.06362	1.07534	1.3366	1.24299	1.47095	1.43197
			population 33
	true	true	7							15							30
	mean	rr	mean	stdev	mse	mrr	srr	prr	mse_rr	mean	stdev	mse	mrr	srr	prr	mse_rr	mean	stdev	mse	mrr	srr	prr	mse_rr
Random	0.201765	1.03659	0.202981	0.0294968	0.00087154	1.09303	0.351181	1.02765	0.123408	0.203854	0.0192139	0.000373538	1.05924	0.214398	1.03175	0.0459899	0.202357	0.0146468	0.000214879	1.03871	0.149725	1.02532	0.0225446
NewEPI	0.201765	1.03659	0.203951	0.0360665	0.00130557	1.09738	0.450548	1.00416	0.204045	0.202667	0.0315392	0.000995535	1.05667	0.316537	1.0083	0.100996	-nan	0		-nan	-nan	-nan				1.498	1.65342	2.66515	2.19605	0	0	481	2	3	3	4	1	1		1.22393	1.28585	1.63253	1.48191	0	0
Grid	0.201765	1.03659	0.20711	0.0381577	0.00148458	1.13178	0.529631	1.01648	0.280913	0.207401	0.0317537	0.00104006	1.06676	0.35316	1.00541	0.125694	0.208411	0.0275291	0.000802021	1.04026	0.243385	1.01041	0.0599217			1.7034	2.2763	2.78435	2.73308	3.73243	2.65792	481	3	7	4	7	3	5		1.30514	1.50874	1.66864	1.6532	1.93195	1.63031
Peri	0.201765	1.03659	0.22588	0.0321886	0.00161764	1.27327	0.430239	1.19118	0.209004	0.219108	0.0249619	0.000923876	1.17234	0.28672	1.13004	0.0909413	0.221436	0.0217782	0.000861238	1.15008	0.209066	1.12838	0.052134			1.85607	1.6936	2.47331	1.97742	4.00801	2.31248	481	4	4	2	3	4	3		1.36238	1.30138	1.57268	1.40621	2.002	1.52069
Quad	0.201765	1.03659	0.235923	0.0315604	0.00216283	1.23643	0.405038	1.15559	0.178217	0.236379	0.0231711	0.00173503	1.18416	0.259125	1.14946	0.0798854	0.235843	0.0192843	0.00153319	1.16264	0.204744	1.1405	0.0527174			2.48162	1.44413	4.64485	1.73702	7.13515	2.33836	481	5	2	6	2	7	4		1.57531	1.20172	2.15519	1.31796	2.67117	1.52917
Square	0.201765	1.03659	0.205651	0.0298352	0.00090524	1.10556	0.324905	1.05052	0.105757	0.205087	0.0196388	0.000396718	1.0762	0.228159	1.04658	0.0521563	0.205512	0.0135995	0.000198986	1.06178	0.155966	1.04827	0.0244618			1.03867	0.856973	1.06206	1.13408	0.926039	1.08504	481	1	1	1	1	2	2		1.01915	0.925728	1.03056	1.06493	0.962309	1.04165
OldEPI	0.201765	1.03659	0.236323	0.0369527	0.00255976	1.26604	0.639095	1.14289	0.419742	0.234557	0.0320323	0.00210138	1.19317	0.345638	1.13168	0.128508	0.233406	0.0277265	0.00176991	1.17725	0.261761	1.14526	0.080328			2.93705	3.40125	5.62562	2.79426	8.23678	3.56307	481	8	8	8	8	8	7		1.71378	1.84425	2.37184	1.6716	2.86998	1.88761
EPI3	0.201765	1.03659	0.234952	0.0375004	0.00250766	1.23017	0.460716	1.13469	0.221883	0.232818	0.0297641	0.00185019	1.22666	0.315851	1.1808	0.120558	0.229573	0.0244293	0.00137008	1.22311	0.22956	1.2013	0.0798272			2.87727	1.79796	4.95315	2.62141	6.37603	3.54086	481	7	6	7	6	6	6		1.69625	1.34088	2.22557	1.61908	2.52508	1.88172
EPI5	0.201765	1.03659	0.233398	0.0352787	0.00224523	1.252	0.450807	1.16288	0.219176	0.229086	0.0293487	0.00160778	1.23302	0.306983	1.19459	0.119203	0.225278	0.024022	0.00112992	1.21196	0.24432	1.18766	0.0825144			2.57617	1.77603	4.3042	2.59193	5.25839	3.66005	481	6	5	5	5	5	8		1.60504	1.33268	2.07466	1.60995	2.29312	1.91313
			population 34
	true	true	7							15							30
	mean	rr	mean	stdev	mse	mrr	srr	prr	mse_rr	mean	stdev	mse	mrr	srr	prr	mse_rr	mean	stdev	mse	mrr	srr	prr	mse_rr
Random	0.221039	1.14517	0.222847	0.030851	0.000955053	1.28013	0.483042	1.16505	0.233725	0.220212	0.0226214	0.000512412	1.24316	0.323611	1.18562	0.10636	0.22087	0.0157377	0.000247704	1.19672	0.204954	1.17182	0.0427164
NewEPI	0.221039	1.14517	0.221502	0.0392273	0.001539	1.34342	0.70149	1.16979	0.492694	0.220876	0.0334395	0.00111823	1.21446	0.368116	1.15036	0.135536	0.220423	0.0315523	0.000995927	1.20239	0.312063	1.15725	0.0975292			1.61142	2.10801	2.18228	1.27431	4.02064	2.28318	494	6	7	6	6	7	8		1.26942	1.4519	1.47725	1.12885	2.00515	1.51102
Grid	0.221039	1.14517	0.229525	0.0420723	0.00184209	1.29698	0.715778	1.13832	0.512385	0.229556	0.0369423	0.00143727	1.21809	0.417675	1.13589	0.174539	0.229275	0.0332183	0.00117129	1.17533	0.302431	1.13354	0.0915998			1.92878	2.19226	2.80492	1.64101	4.72858	2.14437	494	8	8	8	8	8	7		1.38881	1.48063	1.67479	1.28102	2.17453	1.46437
Peri	0.221039	1.14517	0.201076	0.0322112	0.00143608	1.01106	0.402682	0.92234	0.211806	0.208677	0.0264061	0.000850101	1.0359	0.289494	0.985647	0.109254	0.209616	0.0223092	0.000628185	1.02352	0.216505	0.995347	0.0693213			1.50367	0.90622	1.65902	1.02721	2.53604	1.62283	494	3	1	3	4	3	5		1.22624	0.951956	1.28803	1.01351	1.59249	1.2739
Quad	0.221039	1.14517	0.227937	0.0313708	0.00103171	1.16788	0.504654	1.06175	0.261635	0.227815	0.0248802	0.000664938	1.13407	0.290931	1.08782	0.0879299	0.228168	0.0191682	0.000418242	1.10091	0.215038	1.07445	0.0512427			1.08026	1.11941	1.29766	0.826717	1.68848	1.1996	494	2	3	2	1	2	2		1.03936	1.05802	1.13915	0.90924	1.29941	1.09526
Square	0.221039	1.14517	0.223117	0.030646	0.000943495	1.26843	0.505232	1.15599	0.255376	0.224114	0.0209637	0.000448932	1.23758	0.321532	1.18237	0.104767	0.224828	0.0158624	0.000265972	1.2127	0.208522	1.18597	0.0451461			0.987898	1.09264	0.876117	0.985017	1.07375	1.05688	494	1	2	1	2	1	1		0.993931	1.04529	0.936011	0.99248	1.03622	1.02805
OldEPI	0.221039	1.14517	0.228926	0.0395324	0.00162502	1.22901	0.617953	1.08801	0.385133	0.228625	0.0347572	0.00126561	1.15446	0.369968	1.08086	0.141012	0.227702	0.0307682	0.000991078	1.1415	0.281646	1.10009	0.0813567			1.70149	1.64781	2.46991	1.3258	4.00106	1.90458	494	7	6	7	7	6	6		1.30441	1.28367	1.57159	1.15143	2.00027	1.38006
EPI3	0.221039	1.14517	0.227321	0.0383976	0.00151384	1.2172	0.556057	1.086	0.3127	0.227821	0.0323923	0.00109526	1.17058	0.340733	1.10736	0.117529	0.226343	0.02758	0.000788789	1.13462	0.24303	1.10124	0.0609934			1.58508	1.3379	2.13745	1.105	3.1844	1.42787	494	5	5	5	5	5	4		1.259	1.15668	1.462	1.05119	1.78449	1.19494
EPI5	0.221039	1.14517	0.228864	0.0377697	0.00148778	1.20716	0.521225	1.08725	0.27503	0.227146	0.0304197	0.000962654	1.1561	0.32638	1.10335	0.108273	0.224239	0.0259361	0.000682921	1.13009	0.241443	1.10181	0.0601748			1.5578	1.17673	1.87867	1.01798	2.75701	1.40871	494	4	4	4	3	4	3		1.24812	1.08477	1.37065	1.00895	1.66042	1.18689
			population 35
	true	true	7							15							30
	mean	rr	mean	stdev	mse	mrr	srr	prr	mse_rr	mean	stdev	mse	mrr	srr	prr	mse_rr	mean	stdev	mse	mrr	srr	prr	mse_rr
Random	0.0569926	1.0374	0.058899	0.016399	0.000272562	1.15228	0.878126	0.88043	0.795745	0.0586177	0.0109236	0.000121966	1.03818	0.624463	0.874234	0.416577	0.0593528	0.00791608	6.82348e-05	0.912589	0.288019	0.854834	0.116285
NewEPI	0.0569926	1.0374	0.0594629	0.0167145	0.000285477	1.12963	0.860592	0.844726	0.777742	0.0579768	0.012256	0.000151178	1.18185	0.832848	0.947204	0.701771	-nan	0		-nan	-nan	-nan				1.04738	0.977376	1.23951	1.68461	0	0	507	1	3	5	6	1	1		1.02342	0.988623	1.11333	1.29793	0	0
Grid	0.0569926	1.0374	0.0637186	0.0178869	0.00036518	1.12315	0.926229	0.820504	0.904944	0.0616418	0.0126133	0.00018071	1.23716	0.886243	0.995246	0.787204	0.0607577	0.00951096	0.000104634	1.17582	0.649823	1.04329	0.422305			1.33981	1.13723	1.48165	1.88969	1.53344	3.63163	507	7	5	7	7	7	8		1.1575	1.06641	1.21723	1.37466	1.23832	1.90568
Peri	0.0569926	1.0374	0.0643237	0.0169795	0.000342048	0.868265	0.690831	0.668992	0.612972	0.0578435	0.0113386	0.000129288	0.988087	0.657412	0.816572	0.480956	0.059812	0.00823006	7.56828e-05	0.957589	0.361002	0.884117	0.153818			1.25494	0.770312	1.06003	1.15454	1.10915	1.32277	507	5	1	1	2	2	4		1.12024	0.877674	1.02958	1.0745	1.05316	1.15012
Quad	0.0569926	1.0374	0.0668747	0.0173518	0.000398741	0.950777	0.758764	0.72501	0.67331	0.062914	0.011492	0.000167129	1.09402	0.721666	0.905556	0.538185	0.0625182	0.00826858	9.89016e-05	1.00865	0.361943	0.939019	0.140682			1.46294	0.846138	1.37029	1.29192	1.44943	1.2098	507	8	2	6	3	6	3		1.20952	0.919858	1.17059	1.13663	1.20392	1.09991
Square	0.0569926	1.0374	0.0612231	0.0167723	0.000299207	1.17054	0.942713	0.853852	0.922398	0.0611829	0.0114319	0.000148247	1.03732	0.592965	0.890367	0.373226	0.0612461	0.00826364	8.63799e-05	0.944579	0.303023	0.88655	0.114579			1.09776	1.15916	1.21548	0.895935	1.26592	0.985324	507	2	6	3	1	5	2		1.04774	1.07664	1.10249	0.946539	1.12513	0.992635
OldEPI	0.0569926	1.0374	0.0632571	0.0177356	0.000353795	1.1297	0.894269	0.852365	0.833955	0.0626266	0.0124554	0.000186879	1.16267	0.772357	0.949706	0.604226	0.0617527	0.00922305	0.000107723	1.0909	0.422185	0.998694	0.179738			1.29804	1.04802	1.53222	1.45045	1.57871	1.54567	507	6	4	8	4	8	5		1.13932	1.02373	1.23783	1.20435	1.25647	1.24325
EPI3	0.0569926	1.0374	0.061398	0.0170295	0.000309411	1.31347	1.01051	0.986707	1.0237	0.0601464	0.0118406	0.000150146	1.32044	0.894711	1.05368	0.800773	0.0589851	0.00864439	7.86954e-05	1.23146	0.628212	1.07172	0.395828			1.1352	1.28647	1.23105	1.92227	1.1533	3.40394	507	4	8	4	8	3	7		1.06546	1.13423	1.10953	1.38646	1.07392	1.84498
EPI5	0.0569926	1.0374	0.0605535	0.016949	0.000299949	1.29902	0.998667	0.992972	0.99931	0.0592446	0.0119517	0.000147915	1.25552	0.821931	1.02773	0.675664	0.0593263	0.00875881	8.21628e-05	1.18972	0.514425	1.08231	0.26665			1.10048	1.25582	1.21275	1.62194	1.20412	2.29307	507	3	7	2	5	4	6		1.04904	1.12063	1.10125	1.27355	1.09732	1.51429
			population 36
	true	true	7							15							30
	mean	rr	mean	stdev	mse	mrr	srr	prr	mse_rr	mean	stdev	mse	mrr	srr	prr	mse_rr	mean	stdev	mse	mrr	srr	prr	mse_rr
Random	0.08251	1.19291	0.0785112	0.0202091	0.000424398	1.28861	0.915635	1.16566	0.83913	0.0796298	0.0149854	0.000232858	1.18141	0.491881	1.13513	0.245285	0.0795478	0.0102131	0.000113082	1.16777	0.340077	1.14646	0.11781
NewEPI	0.08251	1.19291	0.0784464	0.0246289	0.000623096	1.25292	0.868945	1.11515	0.761112	0.0793043	0.0198399	0.000403898	1.15847	0.535753	1.09893	0.295864	0.0789756	0.0175843	0.0003217	1.17817	0.42961	1.13171	0.18831			1.46819	0.907025	1.73453	1.2062	2.84483	1.59842	520	5	4	5	4	5	7		1.21169	0.952379	1.31701	1.09827	1.68666	1.26429
Grid	0.08251	1.19291	0.0810489	0.0267189	0.000716034	1.32566	0.864854	1.18818	0.747995	0.081502	0.0234625	0.000551505	1.31607	0.616882	1.23664	0.382456	0.0823091	0.0209989	0.000440994	1.23222	0.454298	1.17884	0.206585			1.68718	0.891393	2.36842	1.55923	3.89977	1.75354	520	8	3	8	7	8	8		1.29891	0.944136	1.53897	1.24869	1.97478	1.32421
Peri	0.08251	1.19291	0.0784007	0.0211032	0.000462231	1.38852	0.926584	1.25851	0.862861	0.0781664	0.0169484	0.000306115	1.23553	0.537914	1.18971	0.289362	0.07675	0.0141808	0.000234273	1.19567	0.407488	1.17025	0.16656			1.08915	1.02828	1.3146	1.17969	2.07171	1.4138	520	2	7	3	3	3	5		1.04362	1.01404	1.14656	1.08614	1.43934	1.18903
Quad	0.08251	1.19291	0.0805295	0.0203298	0.000417223	1.2738	0.739821	1.17856	0.547541	0.0815599	0.0158455	0.000251982	1.2437	0.489463	1.20234	0.239663	0.0812047	0.0135667	0.000185759	1.25829	0.380793	1.22778	0.146219			0.983093	0.65251	1.08213	0.977078	1.64269	1.24114	520	1	1	2	2	2	3		0.991511	0.807781	1.04025	0.988472	1.28168	1.11407
Square	0.08251	1.19291	0.0804914	0.0216074	0.000470954	1.25802	0.888299	1.13807	0.792083	0.079656	0.0147909	0.000226916	1.18583	0.4608	1.14693	0.214451	0.0802291	0.0105276	0.000116033	1.14994	0.339981	1.12823	0.119771			1.1097	0.943933	0.974484	0.874291	1.02609	1.01664	520	3	5	1	1	1	1		1.05342	0.971562	0.987159	0.935035	1.01296	1.00829
OldEPI	0.08251	1.19291	0.081386	0.0257843	0.000666093	1.37212	0.91061	1.27051	0.835232	0.0809985	0.0230412	0.000533181	1.32864	0.584007	1.27499	0.347801	0.0820779	0.0205078	0.000420757	1.26712	0.427679	1.23011	0.184293			1.5695	0.995355	2.28973	1.41795	3.72081	1.56433	520	7	6	7	6	7	6		1.2528	0.997675	1.51319	1.19078	1.92894	1.25073
EPI3	0.08251	1.19291	0.0815937	0.0253192	0.000641901	1.39108	0.801905	1.28973	0.652426	0.0818481	0.0211989	0.000449831	1.29578	0.560785	1.23711	0.316433	0.0805941	0.0178391	0.000321904	1.19034	0.371385	1.15591	0.139296			1.5125	0.777503	1.93179	1.29006	2.84664	1.18238	520	6	2	6	5	6	2		1.22984	0.881761	1.38989	1.13581	1.6872	1.08737
EPI5	0.08251	1.19291	0.0803037	0.0243281	0.000596724	1.43173	0.95964	1.30182	0.93277	0.079275	0.0193285	0.000384056	1.25144	0.635868	1.18577	0.404379	0.0795836	0.0163374	0.000275474	1.16799	0.39734	1.13149	0.161651			1.40605	1.11159	1.64932	1.64861	2.43606	1.37214	520	4	8	4	8	4	4		1.18577	1.05432	1.28426	1.28398	1.56079	1.17138
			population 37
	true	true	7							15							30
	mean	rr	mean	stdev	mse	mrr	srr	prr	mse_rr	mean	stdev	mse	mrr	srr	prr	mse_rr	mean	stdev	mse	mrr	srr	prr	mse_rr
Random	0.260869	1.06993	0.260652	0.0335584	0.00112621	1.06245	0.283737	1.01664	0.0833465	0.260433	0.0253086	0.000640715	1.03296	0.187081	1.01187	0.0383703	0.259836	0.0175158	0.00030787	1.02463	0.134968	1.0138	0.0213669
NewEPI	0.260869	1.06993	0.257805	0.0432896	0.00188338	1.09919	0.327025	1.04111	0.107776	0.258827	0.0372883	0.00139459	1.06244	0.246429	1.02702	0.0625685	0.26079	0.0342095	0.0011703	1.05553	0.188697	1.03514	0.0368169			1.67231	1.29311	2.17661	1.63065	3.80126	1.72308	533	3	8	3	6	3	5		1.29318	1.13715	1.47533	1.27697	1.94968	1.31266
Grid	0.260869	1.06993	0.258652	0.043653	0.0019105	1.07312	0.316945	1.01963	0.102984	0.259537	0.0398702	0.00159141	1.05801	0.248722	1.02219	0.0641417	0.259278	0.0363034	0.00132047	1.05089	0.209725	1.02505	0.0459988			1.69639	1.23562	2.4838	1.67165	4.28904	2.1528	533	4	7	4	7	4	8		1.30246	1.11158	1.57601	1.29292	2.071	1.46724
Peri	0.260869	1.06993	0.280158	0.0343728	0.00155355	0.905744	0.220316	0.877937	0.0854005	0.279159	0.0274767	0.00108949	0.889623	0.164655	0.87278	0.0659794	0.282599	0.0239844	0.00104744	0.928225	0.140571	0.916302	0.0433618			1.37945	1.02464	1.70043	1.71954	3.40223	2.02939	533	2	3	2	8	2	7		1.1745	1.01225	1.30401	1.31131	1.84451	1.42457
Quad	0.260869	1.06993	0.291459	0.0355634	0.0022005	1.00426	0.238816	0.972316	0.0665616	0.290671	0.0269366	0.00161374	0.978708	0.170977	0.960764	0.0411504	0.291844	0.0222082	0.00145265	0.964679	0.126393	0.955298	0.0291157			1.9539	0.798613	2.51865	1.07245	4.7184	1.36265	533	5	1	5	2	5	2		1.39782	0.893651	1.58703	1.03559	2.17219	1.16733
Square	0.260869	1.06993	0.256357	0.0340544	0.00118006	1.04809	0.290908	1.00149	0.0893115	0.254327	0.0250749	0.000671548	1.00576	0.181074	0.986479	0.0397519	0.25501	0.0179569	0.000356778	1.00946	0.128876	0.99882	0.0216657			1.04781	1.07157	1.04812	1.03601	1.15886	1.01398	533	1	6	1	1	1	1		1.02363	1.03517	1.02378	1.01784	1.0765	1.00697
OldEPI	0.260869	1.06993	0.290543	0.042427	0.0026806	0.996662	0.262959	0.957414	0.0818073	0.290476	0.0366794	0.00222195	0.98561	0.202434	0.960526	0.0529488	0.289761	0.0344008	0.00201816	0.981578	0.17205	0.963297	0.0409718			2.38019	0.981532	3.46793	1.37994	6.55524	1.91753	533	8	2	8	5	8	6		1.54279	0.990723	1.86224	1.17471	2.56032	1.38475
EPI3	0.260869	1.06993	0.290552	0.0401705	0.00249475	1.0081	0.274744	0.96659	0.0861634	0.288931	0.0356756	0.00206022	0.99129	0.203558	0.967787	0.0518691	0.28705	0.0327356	0.00175706	0.994624	0.168408	0.978927	0.0366428			2.21517	1.0338	3.21551	1.3518	5.70716	1.71493	533	6	5	7	3	7	4		1.48834	1.01676	1.79318	1.16267	2.38897	1.30955
EPI5	0.260869	1.06993	0.289904	0.0409538	0.00252024	1.00693	0.274136	0.965889	0.0859751	0.288074	0.0352098	0.00197984	0.995838	0.207065	0.972691	0.0523313	0.284846	0.0320695	0.00160335	1.01155	0.166414	0.99694	0.0330212			2.2378	1.03154	3.09005	1.36385	5.20787	1.54543	533	7	4	6	4	6	3		1.49593	1.01565	1.75785	1.16784	2.28208	1.24315
			population 38
	true	true	7							15							30
	mean	rr	mean	stdev	mse	mrr	srr	prr	mse_rr	mean	stdev	mse	mrr	srr	prr	mse_rr	mean	stdev	mse	mrr	srr	prr	mse_rr
Random	0.125631	1.06089	0.125759	0.0247482	0.00061249	1.38532	0.934442	1.08282	0.873663	0.126802	0.0175648	0.000309893	1.35875	0.763599	1.14665	0.590438	0.126077	0.0125112	0.000156729	1.17055	0.36148	1.0933	0.131718
NewEPI	0.125631	1.06089	0.124239	0.0329276	0.00108616	1.40333	1.13255	1.04067	1.28308	0.125881	0.0300816	0.000904965	1.29876	0.81194	1.05782	0.659256	0.124501	0.0282259	0.000797978	1.207	0.632892	1.04058	0.400965			1.77336	1.46862	2.92025	1.11655	5.09145	3.04411	546	5	5	6	3	6	7		1.33168	1.21187	1.70887	1.05667	2.25642	1.74474
Grid	0.125631	1.06089	0.131636	0.0355634	0.00130082	1.59036	1.32245	1.09877	1.75031	0.13139	0.0324409	0.00108558	1.46031	1.25312	1.08575	1.57093	0.131082	0.0303844	0.000952925	1.23637	0.654624	1.07224	0.428661			2.12382	2.00341	3.50307	2.66061	6.08008	3.25438	546	8	8	8	8	8	8		1.45733	1.41542	1.87165	1.63114	2.46578	1.80399
Peri	0.125631	1.06089	0.106721	0.0255812	0.00101199	1.10617	0.88864	0.807133	0.854074	0.111959	0.0228427	0.000708712	1.03876	0.690065	0.842472	0.523896	0.11503	0.0199605	0.000510803	1.0067	0.450698	0.895976	0.230325			1.65225	0.977578	2.28696	0.887301	3.25915	1.74862	546	3	1	3	2	3	4		1.2854	0.988726	1.51227	0.941966	1.80531	1.32235
Quad	0.125631	1.06089	0.130797	0.0270274	0.000757168	1.33017	1.04561	0.998556	1.09719	0.130311	0.0203319	0.000435288	1.15846	0.620118	0.987341	0.389956	0.131688	0.0178286	0.000354546	1.10741	0.399257	1.01519	0.161495			1.23621	1.25585	1.40464	0.660451	2.26216	1.22606	546	2	3	2	1	2	2		1.11185	1.12065	1.18518	0.812682	1.50405	1.10728
Square	0.125631	1.06089	0.129196	0.024446	0.000610316	1.47039	1.01401	1.13582	1.03383	0.130273	0.0181242	0.000350035	1.39531	0.869244	1.17347	0.768259	0.13015	0.0128375	0.000185223	1.22289	0.35703	1.14745	0.134963			0.996451	1.18333	1.12953	1.30117	1.1818	1.02463	546	1	2	1	4	1	1		0.998224	1.08781	1.06279	1.14069	1.08711	1.01224
OldEPI	0.125631	1.06089	0.13044	0.0329711	0.00111022	1.42407	1.23662	0.979221	1.5359	0.130108	0.0299149	0.000914945	1.34711	1.09572	1.01724	1.20251	0.129122	0.0281158	0.000802685	1.2	0.602444	1.04313	0.363254			1.81263	1.758	2.95245	2.03664	5.12148	2.75781	546	6	7	7	7	7	6		1.34634	1.3259	1.71827	1.42711	2.26307	1.66067
EPI3	0.125631	1.06089	0.129734	0.032151	0.00105052	1.40209	1.10916	1.0284	1.23129	0.128365	0.0296299	0.000885406	1.35446	1.02262	1.07474	1.04594	0.127875	0.0262778	0.000695558	1.22114	0.599314	1.09862	0.360601			1.71517	1.40934	2.85713	1.77147	4.43797	2.73767	546	4	4	5	6	5	5		1.30964	1.18716	1.6903	1.33097	2.10665	1.65459
EPI5	0.125631	1.06089	0.129595	0.0332156	0.00111899	1.46458	1.17774	1.07967	1.38742	0.128073	0.0284665	0.000816305	1.38816	1.00453	1.13845	1.0151	0.127281	0.0243658	0.000596415	1.19153	0.466858	1.10318	0.219745			1.82695	1.58805	2.63415	1.71922	3.80539	1.6683	546	7	6	4	5	4	3		1.35165	1.26018	1.62301	1.31119	1.95074	1.29163
			population 39
	true	true	7							15							30
	mean	rr	mean	stdev	mse	mrr	srr	prr	mse_rr	mean	stdev	mse	mrr	srr	prr	mse_rr	mean	stdev	mse	mrr	srr	prr	mse_rr
Random	0.187998	0.791447	0.189664	0.0294109	0.000867776	0.868292	0.338382	0.800746	0.114589	0.18839	0.0205438	0.000422201	0.827554	0.185943	0.798305	0.0346218	0.188282	0.0152257	0.000231903	0.812093	0.130368	0.796915	0.0170257
NewEPI	0.187998	0.791447	0.191596	0.0338921	0.00116162	0.859336	0.354942	0.782284	0.126068	0.192388	0.0293308	0.000879568	0.826635	0.223054	0.78827	0.0497632	0.19067	0.0257779	0.00067164	0.817041	0.194578	0.78711	0.0378794			1.33862	1.10017	2.08329	1.43734	2.89622	2.22484	559	4	3	3	3	4	4		1.15699	1.04889	1.44336	1.19889	1.70183	1.49159
Grid	0.187998	0.791447	0.199945	0.0368012	0.00149706	0.851631	0.361355	0.763655	0.13135	0.199373	0.0309011	0.00108427	0.824873	0.283666	0.766132	0.0811072	0.19894	0.0285732	0.000936155	0.81407	0.235654	0.771181	0.0559435			1.72517	1.14627	2.56813	2.34266	4.03685	3.28583	559	8	4	8	5	8	5		1.31346	1.07064	1.60254	1.53058	2.00919	1.81268
Peri	0.187998	0.791447	0.203686	0.0294867	0.00111558	0.833878	0.310262	0.768851	0.0967731	0.205547	0.025238	0.000944924	0.779868	0.203033	0.746722	0.0432227	0.205915	0.0212467	0.000772441	0.783729	0.164965	0.761062	0.0281367			1.28556	0.844524	2.23809	1.24842	3.33089	1.6526	559	2	1	7	2	6	3		1.13383	0.91898	1.49602	1.11733	1.82507	1.28553
Quad	0.187998	0.791447	0.206159	0.0286462	0.00115043	0.89632	0.361811	0.814731	0.131449	0.205216	0.0216836	0.000766638	0.858672	0.229399	0.819051	0.0533859	0.206769	0.0178404	0.00067063	0.825525	0.166328	0.803754	0.0278165			1.32572	1.14714	1.81581	1.54197	2.89186	1.63379	559	3	5	2	4	3	2		1.1514	1.07105	1.34752	1.24176	1.70055	1.2782
Square	0.187998	0.791447	0.192275	0.0300039	0.000918527	0.883783	0.319647	0.81823	0.102892	0.192888	0.020902	0.000460806	0.84081	0.18456	0.813036	0.0345285	0.194287	0.0147577	0.000257341	0.834347	0.13651	0.819644	0.0194301			1.05848	0.897919	1.09144	0.997304	1.1097	1.14122	559	1	2	1	1	1	1		1.02883	0.947586	1.04472	0.998651	1.05342	1.06828
OldEPI	0.187998	0.791447	0.203869	0.0309497	0.00120977	0.932058	0.581255	0.817933	0.338559	0.203575	0.025853	0.00091102	0.870454	0.29613	0.812518	0.088137	0.20326	0.0235603	0.000788016	0.861242	0.240816	0.819465	0.0587774			1.39411	2.95455	2.15779	2.5457	3.39805	3.45227	559	5	8	5	7	7	8		1.18072	1.71888	1.46894	1.59553	1.84338	1.85803
EPI3	0.187998	0.791447	0.203437	0.0321476	0.00127183	0.917039	0.457031	0.80818	0.209157	0.202153	0.0267179	0.00091421	0.887975	0.351033	0.821434	0.124123	0.201178	0.0230038	0.000702887	0.88135	0.235572	0.840426	0.0578931			1.46562	1.82529	2.16534	3.58512	3.03096	3.40033	559	7	7	6	8	5	7		1.21063	1.35103	1.47151	1.89344	1.74097	1.844
EPI5	0.187998	0.791447	0.201243	0.0325822	0.00123703	0.917715	0.432943	0.812453	0.187881	0.201449	0.0265253	0.000884521	0.885152	0.293084	0.825482	0.0870566	0.199552	0.0227653	0.000651754	0.886323	0.231061	0.845954	0.0563602			1.42552	1.63961	2.09502	2.5145	2.81046	3.3103	559	6	6	4	6	2	6		1.19395	1.28047	1.44742	1.58572	1.67644	1.81942
			population 40
	true	true	7							15							30
	mean	rr	mean	stdev	mse	mrr	srr	prr	mse_rr	mean	stdev	mse	mrr	srr	prr	mse_rr	mean	stdev	mse	mrr	srr	prr	mse_rr
Random	0.317644	1.14645	0.314753	0.0340435	0.00116732	1.23782	0.327397	1.17854	0.108219	0.314684	0.0248781	0.000627681	1.21253	0.215268	1.18549	0.0478644	0.314574	0.0180767	0.000336192	1.1996	0.14351	1.18721	0.0222565
NewEPI	0.317644	1.14645	0.318122	0.0456237	0.00208175	1.21733	0.372055	1.14994	0.138437	0.317874	0.0389301	0.00151561	1.19109	0.303842	1.14318	0.0923307	0.319544	0.0379438	0.00144334	1.17254	0.263797	1.13839	0.0696538			1.78336	1.27924	2.41461	1.929	4.29321	3.12959	572	3	7	3	7	5	7		1.33543	1.13103	1.5539	1.38889	2.07201	1.76907
Grid	0.317644	1.14645	0.311261	0.0452516	0.00208845	1.21181	0.418888	1.13393	0.175624	0.310996	0.0399415	0.00163952	1.18391	0.311469	1.13542	0.0971346	0.310979	0.0368595	0.00140304	1.16785	0.27256	1.13134	0.0745173			1.7891	1.62286	2.61202	2.02937	4.17335	3.34811	572	4	8	5	8	4	8		1.33757	1.27392	1.61618	1.42456	2.04288	1.82978
Peri	0.317644	1.14645	0.329564	0.0364282	0.0014691	1.28581	0.31264	1.23694	0.105932	0.318432	0.0276861	0.000767141	1.20285	0.231061	1.17397	0.0541465	0.319204	0.0245064	0.000602997	1.19464	0.189156	1.17466	0.0365758			1.25853	0.978873	1.22218	1.13125	1.79361	1.64338	572	2	3	2	3	2	3		1.12184	0.98938	1.10552	1.0636	1.33926	1.28194
Quad	0.317644	1.14645	0.34553	0.0369086	0.00213987	1.18758	0.287956	1.13973	0.0829638	0.347131	0.0276977	0.00163665	1.17084	0.203958	1.14679	0.041599	0.34337	0.0229231	0.0011873	1.14635	0.158533	1.13113	0.0253674			1.83315	0.766632	2.60745	0.8691	3.5316	1.13978	572	5	1	4	1	3	2		1.35394	0.875575	1.61476	0.932255	1.87926	1.0676
Square	0.317644	1.14645	0.310039	0.0342585	0.00123148	1.20623	0.296453	1.15798	0.0880173	0.308718	0.0246513	0.00068736	1.20031	0.209774	1.17597	0.0448766	0.309687	0.0179952	0.000387141	1.19247	0.149616	1.17959	0.0234832			1.05497	0.813329	1.09508	0.937576	1.15155	1.05512	572	1	2	1	2	1	1		1.02712	0.901848	1.04646	0.968285	1.0731	1.02719
OldEPI	0.317644	1.14645	0.346307	0.0454987	0.0028917	1.1716	0.346641	1.1109	0.121424	0.345233	0.0404016	0.00239344	1.15622	0.272027	1.11549	0.0749572	0.343914	0.0377692	0.00211663	1.16337	0.239326	1.13246	0.0574727			2.47722	1.12202	3.81315	1.56603	6.29588	2.58229	572	7	5	8	5	8	5		1.57392	1.05926	1.95273	1.25141	2.50916	1.60695
EPI3	0.317644	1.14645	0.345441	0.0467621	0.00295937	1.18246	0.339362	1.12303	0.115715	0.343946	0.0403722	0.00232171	1.17699	0.276557	1.13669	0.076579	0.342754	0.0369929	0.00199899	1.17054	0.242799	1.14058	0.0589858			2.53519	1.06927	3.69887	1.59992	5.94597	2.65027	572	8	4	7	6	7	6		1.59223	1.03406	1.92324	1.26488	2.43844	1.62797
EPI5	0.317644	1.14645	0.343108	0.0455031	0.00271895	1.19853	0.355622	1.13514	0.126595	0.342036	0.0386376	0.00208783	1.1727	0.267865	1.13583	0.0718644	0.340246	0.0350564	0.0017398	1.17801	0.232244	1.15124	0.0539602			2.32923	1.16981	3.32626	1.50142	5.17503	2.42447	572	6	6	6	4	6	4		1.52618	1.08158	1.8238	1.22532	2.27487	1.55707
			population 41
	true	true	7							15							30
	mean	rr	mean	stdev	mse	mrr	srr	prr	mse_rr	mean	stdev	mse	mrr	srr	prr	mse_rr	mean	stdev	mse	mrr	srr	prr	mse_rr
Random	0.23579	1.22057	0.237637	0.0322729	0.00104495	1.36278	0.425376	1.28383	0.184947	0.237391	0.021941	0.000483971	1.32354	0.27971	1.28584	0.0824979	0.237689	0.0160717	0.000261906	1.30203	0.17884	1.28475	0.0361028
NewEPI	0.23579	1.22057	0.237585	0.0450864	0.00203601	1.46677	0.613427	1.32637	0.387486	0.237636	0.0404395	0.00163876	1.36348	0.434859	1.28582	0.19336	0.238659	0.0380422	0.00145544	1.23207	0.311309	1.19008	0.0978429			1.94842	2.09513	3.38608	2.34382	5.55711	2.71012	585	7	8	7	8	7	7		1.39586	1.44745	1.84013	1.53095	2.35735	1.64624
Grid	0.23579	1.22057	0.24965	0.0473418	0.00243335	1.32742	0.492869	1.22557	0.242945	0.24811	0.041514	0.00187519	1.28487	0.376642	1.22477	0.141877	0.24555	0.0375482	0.00150512	1.27155	0.316769	1.22998	0.100431			2.32867	1.31359	3.8746	1.71976	5.74682	2.78181	585	8	7	8	7	8	8		1.526	1.14612	1.9684	1.3114	2.39725	1.66788
Peri	0.23579	1.22057	0.230351	0.0374769	0.0014341	1.12755	0.386676	1.05339	0.177467	0.22872	0.0325754	0.00111114	1.13124	0.279042	1.09189	0.094423	0.229108	0.0275291	0.0008025	1.0575	0.198038	1.03633	0.0731634			1.37241	0.959561	2.29589	1.14455	3.06408	2.02653	585	3	2	4	3	4	5		1.1715	0.979572	1.51522	1.06984	1.75045	1.42356
Quad	0.23579	1.22057	0.242939	0.0320805	0.00108027	1.20578	0.372704	1.13483	0.14626	0.244087	0.0267423	0.000783991	1.17229	0.261115	1.1343	0.0756236	0.242001	0.0226694	0.000552478	1.16274	0.189704	1.14333	0.0419536			1.0338	0.790821	1.61991	0.916673	2.10945	1.16206	585	2	1	2	1	2	2		1.01676	0.889281	1.27276	0.95743	1.4524	1.07799
Square	0.23579	1.22057	0.24368	0.0317807	0.00107226	1.36494	0.425564	1.28514	0.185274	0.24204	0.0229373	0.000565182	1.33785	0.266242	1.30135	0.0774102	0.242277	0.01599	0.000297761	1.30593	0.181454	1.28867	0.0375632			1.02614	1.00177	1.1678	0.93833	1.1369	1.04045	585	1	3	1	2	1	1		1.01298	1.00088	1.08065	0.968674	1.06626	1.02002
OldEPI	0.23579	1.22057	0.239695	0.0423756	0.00181094	1.25666	0.465933	1.16519	0.220161	0.241219	0.0380922	0.00148049	1.20371	0.320537	1.15361	0.107228	0.240598	0.0342745	0.00119786	1.20431	0.28212	1.16831	0.0823228			1.73304	1.1904	3.05905	1.29976	4.57362	2.28023	585	6	5	6	4	6	6		1.31645	1.09105	1.74901	1.14007	2.1386	1.51004
EPI3	0.23579	1.22057	0.241872	0.0416722	0.00177356	1.23744	0.459191	1.15007	0.215827	0.24072	0.0349289	0.00124433	1.23496	0.328524	1.18583	0.109135	0.240708	0.0302239	0.000937671	1.24149	0.251912	1.21233	0.0635276			1.69727	1.16697	2.57109	1.32288	3.58018	1.75963	585	5	4	5	5	5	4		1.30279	1.08026	1.60346	1.15017	1.89214	1.32651
EPI5	0.23579	1.22057	0.238144	0.0406585	0.00165865	1.28718	0.478059	1.19315	0.229292	0.239156	0.0330186	0.00110156	1.25924	0.330406	1.21133	0.109254	0.238336	0.0274533	0.000760166	1.24029	0.245619	1.21334	0.060381			1.5873	1.23978	2.27608	1.32432	2.90244	1.67247	585	4	6	3	6	3	3		1.25988	1.11345	1.50867	1.15079	1.70366	1.29324
			population 42
	true	true	7							15							30
	mean	rr	mean	stdev	mse	mrr	srr	prr	mse_rr	mean	stdev	mse	mrr	srr	prr	mse_rr	mean	stdev	mse	mrr	srr	prr	mse_rr
Random	0.355154	0.986415	0.354855	0.0413795	0.00171235	0.965658	0.203248	0.947727	0.0428065	0.356877	0.0281849	0.000797357	0.958116	0.135638	0.949714	0.0197446	0.355344	0.0205071	0.000420577	0.956632	0.0974024	0.95209	0.0106654
NewEPI	0.355154	0.986415	0.352625	0.0512311	0.00263102	0.966383	0.234688	0.941805	0.0570685	0.351987	0.046046	0.00213026	0.943501	0.196755	0.927068	0.0422346	0.35472	0.0455602	0.00207592	0.948992	0.18244	0.935075	0.0359201			1.5365	1.33317	2.67166	2.13904	4.93588	3.3679	598	2	7	2	7	2	8		1.23955	1.15463	1.63452	1.46255	2.22168	1.83518
Grid	0.355154	0.986415	0.378532	0.0534387	0.00340223	1.00616	0.247679	0.98258	0.0613596	0.377048	0.0487889	0.0028597	1.0053	0.210332	0.988567	0.0442442	0.375251	0.0456252	0.00248555	1.00279	0.188382	0.988793	0.0354934			1.98687	1.43342	3.58648	2.24082	5.90985	3.32789	598	3	8	3	8	3	7		1.40956	1.19725	1.8938	1.49694	2.43102	1.82425
Peri	0.355154	0.986415	0.4339	0.0434387	0.00808785	1.07552	0.191389	1.05793	0.0417441	0.423616	0.0357721	0.00596669	1.0303	0.151514	1.01856	0.0239898	0.42454	0.0328706	0.00589489	1.02524	0.131788	1.01681	0.0182919			4.72324	0.975182	7.48308	1.215	14.0162	1.71507	598	4	3	4	3	5	3		2.1733	0.987513	2.73552	1.10227	3.74382	1.30961
Quad	0.355154	0.986415	0.437951	0.0421963	0.00863587	1.03	0.182242	1.01609	0.0340928	0.438244	0.0334594	0.00802348	1.02487	0.127893	1.01752	0.0173241	0.43804	0.0276495	0.00763458	1.01901	0.105508	1.0139	0.0118874			5.04328	0.796438	10.0626	0.87741	18.1526	1.11457	598	5	1	7	1	7	2		2.24572	0.892434	3.17216	0.936702	4.26059	1.05573
Square	0.355154	0.986415	0.370386	0.0399595	0.00182878	0.953078	0.183662	0.937053	0.0361683	0.367206	0.0297626	0.00103106	0.958612	0.135465	0.950416	0.0196467	0.366425	0.0205827	0.000550683	0.951309	0.0955427	0.946774	0.0106998			1.06799	0.844926	1.2931	0.99504	1.30935	1.00322	598	1	2	1	2	1	1		1.03344	0.919199	1.13715	0.997517	1.14427	1.00161
OldEPI	0.355154	0.986415	0.438382	0.0538867	0.00983068	1.03221	0.208895	1.01444	0.0444225	0.435518	0.0490669	0.00886593	1.02929	0.18015	1.01598	0.0333281	0.432191	0.0468264	0.00812741	1.03032	0.159433	1.01994	0.0265428			5.74104	1.03775	11.1191	1.68796	19.3244	2.48868	598	8	5	8	5	8	4		2.39605	1.0187	3.33454	1.29921	4.39596	1.57755
EPI3	0.355154	0.986415	0.43449	0.0538249	0.00919132	1.03404	0.216753	1.01531	0.0478168	0.429801	0.0482662	0.0079018	1.03712	0.1795	1.02502	0.0337106	0.421616	0.0440609	0.00635856	1.04808	0.156656	1.03881	0.0272863			5.36766	1.11704	9.90999	1.70733	15.1187	2.55839	598	7	6	6	6	6	5		2.31682	1.0569	3.14801	1.30665	3.88827	1.5995
EPI5	0.355154	0.986415	0.43229	0.0535434	0.00881686	1.05077	0.203682	1.03324	0.0436789	0.423578	0.0475215	0.00694014	1.05456	0.173385	1.04243	0.0332	0.414779	0.0407259	0.00521374	1.06903	0.155867	1.05993	0.029699			5.14897	1.02038	8.70392	1.68147	12.3966	2.7846	598	6	4	5	4	4	6		2.26914	1.01014	2.95024	1.29672	3.52088	1.66871
			population 43
	true	true	7							15							30
	mean	rr	mean	stdev	mse	mrr	srr	prr	mse_rr	mean	stdev	mse	mrr	srr	prr	mse_rr	mean	stdev	mse	mrr	srr	prr	mse_rr
Random	0.11341	1.02105	0.115131	0.021223	0.000453377	1.14526	0.805823	0.896237	0.664929	0.115208	0.0151015	0.000231288	1.02156	0.520724	0.910244	0.283431	0.115499	0.0109108	0.000123409	0.965694	0.265859	0.915406	0.0818417
NewEPI	0.11341	1.02105	0.115597	0.0220501	0.00049099	1.13809	0.824026	0.889691	0.696274	0.116467	0.0168095	0.000291904	1.02396	0.563734	0.89288	0.334224	0.114014	0.0130656	0.000171075	1.13399	0.503603	1.02518	0.253633			1.08296	1.04714	1.26208	1.1792	1.38624	3.09907	611	1	2	2	4	2	8		1.04065	1.0233	1.12342	1.08591	1.17739	1.76042
Grid	0.11341	1.02105	0.119655	0.0224257	0.000541912	1.33993	0.934486	1.07112	0.875771	0.119445	0.0166692	0.000314283	1.23436	0.651693	1.07064	0.427163	0.119611	0.0130432	0.000208577	1.19168	0.483205	1.08217	0.237223			1.19528	1.31709	1.35884	1.50711	1.69013	2.89856	611	5	8	5	7	5	7		1.09329	1.14765	1.16569	1.22764	1.30005	1.70251
Peri	0.11341	1.02105	0.125453	0.0210526	0.000588246	1.27046	0.87415	1.03115	0.76424	0.131054	0.0153039	0.00054552	1.24258	0.581498	1.0961	0.343772	0.125508	0.0119245	0.000288555	1.11732	0.339388	1.0489	0.11596			1.29747	1.14936	2.35862	1.21289	2.3382	1.41688	611	7	5	8	5	8	2		1.13907	1.07208	1.53578	1.10131	1.52912	1.19033
Quad	0.11341	1.02105	0.12197	0.0210913	0.000518116	1.28111	0.842005	1.05643	0.710224	0.123004	0.0150956	0.000319922	1.13888	0.545132	1.00987	0.297294	0.122978	0.0111474	0.000215811	1.12768	0.482697	1.03105	0.233096			1.14279	1.06812	1.38322	1.04891	1.74874	2.84814	611	2	3	6	2	6	6		1.06901	1.0335	1.1761	1.02416	1.3224	1.68764
Square	0.11341	1.02105	0.119312	0.0220704	0.000521936	1.18343	0.803419	0.937107	0.652529	0.119904	0.0159474	0.000296492	1.05074	0.493298	0.936848	0.250433	0.119127	0.0111734	0.000157529	0.980464	0.241999	0.937144	0.0656037			1.15122	0.981351	1.28191	0.883575	1.27647	0.801593	611	3	1	3	1	1	1		1.07295	0.990631	1.13222	0.939987	1.12981	0.895317
OldEPI	0.11341	1.02105	0.123283	0.0224035	0.000599393	1.25273	0.88738	1.00807	0.787612	0.121654	0.0169553	0.000355446	1.15112	0.557924	1.00953	0.311412	0.121208	0.0130054	0.000229949	1.11554	0.364628	1.03645	0.133191			1.32206	1.18451	1.53681	1.09872	1.8633	1.62742	611	8	6	7	3	7	3		1.14981	1.08835	1.23968	1.0482	1.36503	1.2757
EPI3	0.11341	1.02105	0.12217	0.0218794	0.000555446	1.2934	0.89675	1.03687	0.804411	0.120397	0.0162152	0.000311751	1.22848	0.604843	1.0726	0.368492	0.119631	0.0122885	0.000189708	1.20334	0.434439	1.11237	0.197077			1.22513	1.20977	1.34789	1.30011	1.53722	2.40802	611	6	7	4	6	4	5		1.10686	1.0999	1.16099	1.14022	1.23985	1.55178
EPI5	0.11341	1.02105	0.119722	0.022202	0.00053277	1.30982	0.868907	1.08225	0.758745	0.119061	0.0157703	0.000280636	1.29423	0.703936	1.12534	0.506402	0.119407	0.0120666	0.000181567	1.16587	0.371526	1.09279	0.143178			1.17511	1.14109	1.21336	1.78668	1.47126	1.74945	611	4	4	1	8	3	4		1.08403	1.06822	1.10153	1.33667	1.21295	1.32267
			population 44
	true	true	7							15							30
	mean	rr	mean	stdev	mse	mrr	srr	prr	mse_rr	mean	stdev	mse	mrr	srr	prr	mse_rr	mean	stdev	mse	mrr	srr	prr	mse_rr
Random	0.369372	0.957503	0.371029	0.0409718	0.00168143	0.990001	0.218522	0.957229	0.0477519	0.369899	0.0300847	0.000905367	0.969523	0.152106	0.953618	0.0231513	0.3697	0.020677	0.000427646	0.95895	0.10933	0.950174	0.0120068
NewEPI	0.369372	0.957503	0.37216	0.0513069	0.00264017	0.964181	0.238935	0.929097	0.0578968	0.372207	0.0463154	0.00215315	0.950663	0.208627	0.925134	0.044573	0.372126	0.0437678	0.0019232	0.943205	0.179862	0.924131	0.033464			1.57019	1.21245	2.37821	1.92529	4.49719	2.7871	624	2	2	2	3	2	4		1.25307	1.10111	1.54214	1.38755	2.12066	1.66946
Grid	0.369372	0.957503	0.391034	0.0538555	0.00336966	1.00383	0.267046	0.965821	0.0713828	0.392075	0.0492794	0.00294389	0.984612	0.214986	0.961743	0.046237	0.391173	0.0467382	0.00265974	0.978491	0.195868	0.961369	0.0383792			2.00404	1.49487	3.25159	1.99716	6.2195	3.19647	624	3	4	3	4	4	5		1.41564	1.22265	1.80322	1.41321	2.49389	1.78787
Peri	0.369372	0.957503	0.414388	0.0391305	0.00355764	1.17568	0.246431	1.13878	0.0935896	0.412263	0.0342134	0.00301019	1.10022	0.188116	1.07872	0.0500812	0.405738	0.0304215	0.00224795	1.06505	0.151914	1.05271	0.0321422			2.11583	1.95991	3.32483	2.16321	5.25658	2.67701	624	4	6	4	5	3	3		1.45459	1.39997	1.82341	1.47079	2.29272	1.63616
Quad	0.369372	0.957503	0.417555	0.040893	0.00399384	1.08818	0.24722	1.05628	0.0708746	0.417059	0.0311125	0.00324204	1.07326	0.176462	1.05628	0.0408957	0.4162	0.0270498	0.00292455	1.06679	0.139753	1.05648	0.0293273			2.37526	1.48423	3.58091	1.76645	6.83873	2.44257	624	5	3	5	2	5	2		1.54119	1.21829	1.89233	1.32908	2.6151	1.56287
Square	0.369372	0.957503	0.382302	0.0422118	0.00194902	1.0064	0.228623	0.973558	0.0525262	0.383337	0.0300059	0.00109538	0.97592	0.146477	0.960886	0.021467	0.384356	0.0207662	0.000655755	0.972237	0.0988553	0.965503	0.00983637			1.15914	1.09998	1.20987	0.927245	1.53341	0.819236	624	1	1	1	1	1	1		1.07663	1.0488	1.09994	0.962936	1.23831	0.905116
OldEPI	0.369372	0.957503	0.416629	0.0534906	0.00509447	1.10641	0.291196	1.06044	0.0953911	0.416417	0.0478971	0.00450736	1.08718	0.238163	1.05582	0.0663878	0.415727	0.0440798	0.00409181	1.08088	0.206723	1.05893	0.0530218			3.02984	1.99764	4.9785	2.86756	9.56823	4.416	624	8	8	8	7	8	6		1.74064	1.41338	2.23125	1.69339	3.09326	2.10143
EPI3	0.369372	0.957503	0.41633	0.0516324	0.00487096	1.10284	0.292356	1.05643	0.0952586	0.414308	0.0452584	0.00406757	1.09708	0.232514	1.07004	0.0667273	0.411245	0.0416829	0.00349081	1.10509	0.200142	1.08687	0.0567926			2.89691	1.99486	4.49273	2.88222	8.16286	4.73005	624	7	7	7	8	7	8		1.70203	1.4124	2.11961	1.69771	2.85707	2.17487
EPI5	0.369372	0.957503	0.41531	0.0514643	0.00475887	1.08998	0.276713	1.04839	0.0848305	0.411662	0.0448657	0.00380138	1.09492	0.227881	1.06885	0.0643279	0.40787	0.0400556	0.00308655	1.11117	0.191103	1.09459	0.0553132			2.83025	1.77648	4.19871	2.77858	7.21753	4.60684	624	6	5	6	6	6	7		1.68233	1.33285	2.04908	1.66691	2.68655	2.14635
			population 45
	true	true	7							15							30
	mean	rr	mean	stdev	mse	mrr	srr	prr	mse_rr	mean	stdev	mse	mrr	srr	prr	mse_rr	mean	stdev	mse	mrr	srr	prr	mse_rr
Random	0.289051	1.10619	0.28866	0.0359911	0.00129551	1.2048	0.325172	1.14875	0.107548	0.288766	0.0251541	0.00063281	1.16511	0.208228	1.14099	0.0445699	0.289983	0.0180133	0.000325347	1.16064	0.14897	1.14815	0.0239527
NewEPI	0.289051	1.10619	0.292115	0.0447842	0.00201501	1.20077	0.373102	1.13519	0.140046	0.294237	0.0371317	0.00140566	1.17394	0.282203	1.13512	0.0804755	0.295071	0.0382082	0.00149611	1.16637	0.240671	1.13981	0.0590528			1.55538	1.30217	2.2213	1.8056	4.59849	2.46539	637	2	7	3	6	3	6		1.24715	1.14113	1.4904	1.34373	2.14441	1.57016
Grid	0.289051	1.10619	0.307708	0.0448317	0.00235796	1.22005	0.367301	1.1506	0.136882	0.307134	0.0406419	0.00197876	1.19931	0.307434	1.1515	0.0965687	0.306646	0.0375721	0.00172125	1.18013	0.260695	1.14584	0.069534			1.8201	1.27275	3.12694	2.16668	5.29049	2.90297	637	4	6	4	8	4	8		1.34911	1.12816	1.76832	1.47196	2.30011	1.70381
Peri	0.289051	1.10619	0.318075	0.0355627	0.0021071	1.16061	0.292052	1.11471	0.085367	0.308747	0.0280693	0.00117582	1.1008	0.21626	1.07497	0.0477431	0.311307	0.0249194	0.00111631	1.10836	0.166691	1.09251	0.027973			1.62646	0.793755	1.85809	1.07119	3.43112	1.16784	637	3	1	2	2	2	3		1.27533	0.89093	1.36312	1.03499	1.85233	1.08067
Quad	0.289051	1.10619	0.326171	0.0364224	0.00270449	1.16715	0.294848	1.12088	0.0871511	0.328599	0.0271586	0.00230163	1.14189	0.195742	1.12173	0.0385564	0.329256	0.0225884	0.00212668	1.12938	0.161726	1.11644	0.0262604			2.08758	0.810345	3.63716	0.865077	6.53663	1.09634	637	5	2	5	1	6	2		1.44485	0.900192	1.90714	0.930095	2.55668	1.04706
Square	0.289051	1.10619	0.297254	0.0354132	0.00132138	1.23558	0.33026	1.18159	0.114757	0.298213	0.0252426	0.000721131	1.20269	0.213601	1.17606	0.0505072	0.297395	0.0174336	0.000373553	1.18654	0.144164	1.17405	0.0253882			1.01997	1.06703	1.13957	1.13321	1.14817	1.05993	637	1	4	1	3	1	1		1.00994	1.03297	1.06751	1.06452	1.07152	1.02953
OldEPI	0.289051	1.10619	0.327845	0.0440946	0.00344931	1.1705	0.338327	1.11437	0.114532	0.327942	0.0396247	0.00308263	1.16822	0.269634	1.13213	0.0733754	0.326655	0.036887	0.00277471	1.16936	0.241285	1.14151	0.059466			2.66251	1.06494	4.87133	1.6463	8.52845	2.48264	637	8	3	8	5	8	7		1.63172	1.03196	2.20711	1.28308	2.92035	1.57564
EPI3	0.289051	1.10619	0.325653	0.0450286	0.00336728	1.18225	0.350772	1.12263	0.123311	0.324427	0.0391741	0.00278607	1.17208	0.265048	1.13751	0.0712314	0.320458	0.0344361	0.00217224	1.19021	0.231847	1.16623	0.0573578			2.59919	1.14657	4.4027	1.59819	6.67669	2.39463	637	7	5	7	4	7	5		1.6122	1.07078	2.09826	1.2642	2.58393	1.54746
EPI5	0.289051	1.10619	0.324148	0.0446292	0.00322356	1.23914	0.381204	1.17136	0.149564	0.322307	0.0376159	0.00252092	1.20544	0.281207	1.16668	0.0827364	0.319032	0.0323635	0.00194626	1.20421	0.216216	1.18427	0.0528458			2.48826	1.39067	3.98369	1.85633	5.98209	2.20626	637	6	8	6	7	5	4		1.57742	1.17927	1.99592	1.36247	2.44583	1.48535
			population 46
	true	true	7							15							30
	mean	rr	mean	stdev	mse	mrr	srr	prr	mse_rr	mean	stdev	mse	mrr	srr	prr	mse_rr	mean	stdev	mse	mrr	srr	prr	mse_rr
Random	0.206612	1.02531	0.201673	0.0297767	0.000911046	1.03724	0.292161	1.00575	0.0857406	0.20308	0.0196594	0.000398967	1.02253	0.199301	1.00626	0.0400838	0.203222	0.0151173	0.000240025	1.00538	0.142054	0.997581	0.0209482
NewEPI	0.206612	1.02531	0.205506	0.039674	0.00157525	1.02964	0.31292	0.990889	0.0991037	0.207668	0.0364353	0.00132865	1.05097	0.238099	1.02941	0.0567079	0.206004	0.0306965	0.000942645	1.04135	0.193269	1.02742	0.0373574			1.72906	1.15585	3.33022	1.41474	3.92728	1.78332	650	7	2	8	7	7	7		1.31494	1.07511	1.82489	1.18943	1.98174	1.33541
Grid	0.206612	1.02531	0.211857	0.0396133	0.00159672	1.07183	0.344154	1.02891	0.118455	0.211451	0.0354014	0.00127667	1.04699	0.259011	1.02195	0.067098	0.211101	0.0330945	0.0011154	1.02941	0.193053	1.01521	0.0373715			1.75263	1.38155	3.19995	1.67394	4.64701	1.78399	650	8	7	7	8	8	8		1.32387	1.17539	1.78884	1.29381	2.15569	1.33566
Peri	0.206612	1.02531	0.201307	0.0333759	0.00114209	1.19254	0.35296	1.14334	0.138512	0.206112	0.0282454	0.000798053	1.073	0.226629	1.05218	0.0520827	0.207804	0.0256265	0.000658138	0.945353	0.145276	0.937807	0.0287619			1.25361	1.61547	2.0003	1.29935	2.74196	1.373	650	3	8	3	4	3	3		1.11965	1.27101	1.41432	1.13989	1.65589	1.17175
Quad	0.206612	1.02531	0.198199	0.0292555	0.000926663	1.07533	0.3182	1.03808	0.101414	0.196876	0.0219299	0.00057571	1.05088	0.212224	1.03289	0.0450965	0.196053	0.0185927	0.000457181	1.03401	0.155352	1.02458	0.0241348			1.01714	1.1828	1.443	1.12506	1.90472	1.15211	650	1	3	2	2	2	2		1.00853	1.08757	1.20125	1.06069	1.38012	1.07337
Square	0.206612	1.02531	0.20653	0.0308394	0.000951075	1.0448	0.303132	1.01147	0.0920806	0.205534	0.0199288	0.000398319	1.01498	0.198078	0.999973	0.0398769	0.205445	0.0149713	0.000225502	1.00569	0.138406	0.998375	0.0198817			1.04394	1.07394	0.998376	0.994837	0.939493	0.949088	650	2	1	1	1	1	1		1.02173	1.03631	0.999188	0.997415	0.969274	0.974211
OldEPI	0.206612	1.02531	0.195912	0.0369052	0.00147648	1.07129	0.342683	1.02931	0.117448	0.196981	0.0326896	0.00116137	1.04309	0.235692	1.02227	0.05556	0.197325	0.0286069	0.000904603	1.03034	0.179895	1.01809	0.0324143			1.62065	1.3698	2.91093	1.3861	3.76879	1.54735	650	6	6	6	5	6	6		1.27305	1.17039	1.70615	1.17733	1.94134	1.24393
EPI3	0.206612	1.02531	0.197503	0.036886	0.00144355	1.06762	0.323394	1.02841	0.104593	0.198645	0.0321721	0.00109852	1.05492	0.223648	1.03424	0.0500982	0.20009	0.0286429	0.000862952	1.04888	0.175974	1.03651	0.0310923			1.5845	1.21988	2.7534	1.24984	3.59526	1.48424	650	5	5	5	3	5	5		1.25877	1.10448	1.65934	1.11796	1.89612	1.2183
EPI5	0.206612	1.02531	0.19837	0.035527	0.0013301	1.05909	0.321366	1.02188	0.103288	0.199027	0.030442	0.000984247	1.04905	0.237822	1.0273	0.0565633	0.200511	0.0269584	0.000763977	1.04649	0.174069	1.03546	0.030403			1.45997	1.20465	2.46699	1.41113	3.18291	1.45134	650	4	4	4	6	4	4		1.20829	1.09757	1.57067	1.18791	1.78407	1.20472
			population 47
	true	true	7							15							30
	mean	rr	mean	stdev	mse	mrr	srr	prr	mse_rr	mean	stdev	mse	mrr	srr	prr	mse_rr	mean	stdev	mse	mrr	srr	prr	mse_rr
Random	0.191652	1.39904	0.195493	0.0320157	0.00103976	1.46536	0.528464	1.42912	0.280179	0.195692	0.0229175	0.000541533	1.43535	0.354895	1.41837	0.126324	0.196523	0.016167	0.000285098	1.43302	0.250527	1.42527	0.0634518
NewEPI	0.191652	1.39904	0.194786	0.0385727	0.00149767	1.41262	0.555988	1.3728	0.309811	0.19496	0.0339769	0.00116537	1.37222	0.45093	1.34173	0.206622	0.195768	0.0320998	0.00104734	1.36671	0.387547	1.34719	0.152881			1.44041	1.10576	2.15199	1.63565	3.6736	2.40941	663	4	4	4	7	6	7		1.20017	1.05155	1.46697	1.27893	1.91666	1.55223
Grid	0.191652	1.39904	0.193758	0.0418323	0.00175438	1.44098	0.62218	1.40126	0.387113	0.192468	0.0371829	0.00138323	1.38925	0.500959	1.36095	0.252411	0.191978	0.0329216	0.00108394	1.34936	0.396788	1.32847	0.162421			1.68729	1.38166	2.55429	1.99812	3.80198	2.55975	663	5	8	6	8	7	8		1.29896	1.17544	1.59821	1.41355	1.94987	1.59992
Peri	0.191652	1.39904	0.203016	0.0340712	0.00128999	1.40887	0.515021	1.37359	0.265894	0.201953	0.0269183	0.000830705	1.44163	0.394428	1.41701	0.155896	0.203913	0.0231963	0.0006884	1.4175	0.315592	1.39899	0.0995983			1.24066	0.949016	1.53399	1.2341	2.41461	1.56967	663	2	3	2	3	2	3		1.11385	0.974174	1.23854	1.1109	1.5539	1.25286
Quad	0.191652	1.39904	0.21119	0.0321677	0.00141649	1.43323	0.513564	1.39408	0.263773	0.211299	0.0242468	0.000973912	1.38677	0.371229	1.37365	0.138456	0.210862	0.0215748	0.000834496	1.40076	0.28384	1.39044	0.0806391			1.36233	0.941443	1.79843	1.09603	2.92705	1.27087	663	3	2	3	2	4	2		1.16719	0.97028	1.34106	1.04692	1.71086	1.12733
Square	0.191652	1.39904	0.194452	0.0328022	0.00108382	1.44445	0.509008	1.40912	0.259191	0.195527	0.0234701	0.000565861	1.42276	0.350312	1.40608	0.122768	0.195447	0.0163497	0.000281715	1.39773	0.249406	1.38811	0.0623228			1.04238	0.92509	1.04492	0.97185	0.988131	0.982207	663	1	1	1	1	1	1		1.02097	0.961816	1.02222	0.985824	0.994048	0.991064
OldEPI	0.191652	1.39904	0.210779	0.0407012	0.00202243	1.41974	0.596905	1.37075	0.357096	0.210182	0.0363968	0.00166809	1.36239	0.448156	1.33384	0.205095	0.208566	0.0329761	0.00137351	1.35623	0.370921	1.33473	0.141718			1.9451	1.27453	3.0803	1.62356	4.81766	2.23348	663	8	7	8	6	8	6		1.39467	1.12895	1.75508	1.27419	2.19492	1.49448
EPI3	0.191652	1.39904	0.209548	0.0392317	0.00185939	1.3703	0.557401	1.328	0.315743	0.207152	0.0338236	0.00138429	1.36695	0.431112	1.33798	0.189586	0.201669	0.028319	0.000902306	1.34951	0.338067	1.32938	0.119142			1.78829	1.12693	2.55623	1.50079	3.16489	1.87767	663	6	6	7	5	5	5		1.33727	1.06157	1.59882	1.22507	1.77901	1.37028
EPI5	0.191652	1.39904	0.207899	0.0405047	0.0019046	1.35512	0.555029	1.31333	0.315403	0.203817	0.0328483	0.001227	1.35501	0.409673	1.33119	0.172436	0.199469	0.0271704	0.000799336	1.32497	0.326286	1.30447	0.115406			1.83177	1.12572	2.26578	1.36503	2.80372	1.8188	663	7	5	5	4	3	4		1.35343	1.061	1.50525	1.16834	1.67443	1.34863
			population 48
	true	true	7							15							30
	mean	rr	mean	stdev	mse	mrr	srr	prr	mse_rr	mean	stdev	mse	mrr	srr	prr	mse_rr	mean	stdev	mse	mrr	srr	prr	mse_rr
Random	0.197235	1.0495	0.193076	0.0266133	0.000725565	1.28499	0.634024	1.13183	0.408765	0.19414	0.0187699	0.000361888	1.21392	0.334441	1.15113	0.122179	0.194655	0.0130226	0.000176244	1.1695	0.215851	1.13983	0.0547512
NewEPI	0.197235	1.0495	0.194563	0.0277441	0.000776875	1.26013	0.595709	1.11182	0.358753	0.195844	0.0193061	0.00037466	1.14596	0.317295	1.08891	0.102229	0.196742	0.0149846	0.000224781	1.13073	0.184794	1.10861	0.0376428			1.07072	0.877652	1.03529	0.836714	1.27539	0.687525	676	6	7	4	7	8	3		1.03475	0.936831	1.01749	0.914721	1.12933	0.829172
Grid	0.197235	1.0495	0.198779	0.0282372	0.000799723	1.17956	0.556713	1.05444	0.309954	0.198205	0.0200432	0.000402671	1.11994	0.284148	1.07292	0.0812886	0.196806	0.0144653	0.000209429	1.1131	0.200272	1.08838	0.0416205			1.10221	0.758269	1.11269	0.665321	1.18829	0.760176	676	7	6	7	2	6	6		1.04986	0.870787	1.05484	0.815672	1.09009	0.871881
Peri	0.197235	1.0495	0.204512	0.0284242	0.00086089	1.2762	0.523776	1.14461	0.283387	0.204591	0.0190666	0.000417646	1.21342	0.312426	1.15535	0.108814	0.201972	0.0134832	0.000204236	1.14943	0.190358	1.12287	0.0416193			1.18651	0.693277	1.15407	0.89061	1.15882	0.760154	676	8	4	8	8	4	5		1.08927	0.832633	1.07428	0.943721	1.07649	0.871868
Quad	0.197235	1.0495	0.201211	0.0275644	0.000775605	1.22108	0.520727	1.09837	0.273545	0.201173	0.0185313	0.000358917	1.13688	0.287619	1.08492	0.0839793	0.201567	0.0140317	0.000215655	1.11486	0.18917	1.09001	0.0374263			1.06897	0.669199	0.991789	0.687344	1.22361	0.683572	676	5	3	2	3	7	2		1.03391	0.818046	0.995886	0.829062	1.10617	0.826784
Square	0.197235	1.0495	0.197007	0.0266395	0.000709715	1.23798	0.536721	1.10496	0.291145	0.196338	0.0186269	0.000347766	1.1603	0.29174	1.1083	0.0885697	0.195807	0.0132812	0.000178429	1.14536	0.196007	1.1199	0.0433749			0.978155	0.712256	0.960977	0.724915	1.0124	0.792219	676	1	5	1	4	1	7		0.989017	0.843953	0.980294	0.851419	1.00618	0.890067
OldEPI	0.197235	1.0495	0.200926	0.0273433	0.000761279	1.19817	0.469358	1.09602	0.222461	0.200118	0.0190423	0.000370921	1.15973	0.296511	1.10681	0.0912032	0.199554	0.0142734	0.000209108	1.1328	0.204955	1.10577	0.0451729			1.04922	0.544228	1.02496	0.746469	1.18646	0.825058	676	3	1	3	5	5	8		1.02432	0.737718	1.0124	0.863985	1.08925	0.908327
EPI3	0.197235	1.0495	0.201811	0.0273439	0.000768628	1.22312	0.502045	1.11036	0.255753	0.200014	0.0196453	0.000393661	1.17094	0.270157	1.12816	0.0791722	0.198139	0.0140497	0.000198211	1.13667	0.17827	1.11624	0.0362344			1.05935	0.625673	1.0878	0.647999	1.12464	0.661802	676	4	2	6	1	3	1		1.02925	0.790995	1.04297	0.804984	1.06049	0.813512
EPI5	0.197235	1.0495	0.198791	0.027113	0.000737536	1.23593	0.625047	1.10571	0.393843	0.199017	0.0193527	0.000377702	1.15943	0.300172	1.10877	0.0936162	0.198864	0.0138169	0.00019356	1.12793	0.196651	1.10127	0.0413517			1.0165	0.963496	1.0437	0.766219	1.09825	0.755267	676	2	8	5	6	2	4		1.00822	0.981579	1.02162	0.875339	1.04797	0.869061
			population 49
	true	true	7							15							30
	mean	rr	mean	stdev	mse	mrr	srr	prr	mse_rr	mean	stdev	mse	mrr	srr	prr	mse_rr	mean	stdev	mse	mrr	srr	prr	mse_rr
Random	0.052009	0.897533	0.0515727	0.0191225	0.00036586	1.14662	1.03943	0.871001	1.08112	0.0516178	0.0129816	0.000168675	1.00893	0.617397	0.854425	0.383037	0.0514991	0.00921279	8.51353e-05	0.933982	0.353185	0.873408	0.125322
NewEPI	0.052009	0.897533	0.0517165	0.0233068	0.000543292	1.21973	1.30844	0.856731	1.71368	0.0516401	0.020564	0.000423014	1.06915	0.992366	0.815962	0.991444	0.0506233	0.0173734	0.000303755	1.00339	0.662756	0.845488	0.441954			1.48497	1.5851	2.50787	2.58837	3.56791	3.52656	689	6	5	6	5	4	6		1.21859	1.25901	1.58362	1.60884	1.88889	1.87791
Grid	0.052009	0.897533	0.0524342	0.025225	0.000636481	1.25839	1.35184	0.839686	1.83082	0.0526836	0.022771	0.000518973	1.17268	1.28723	0.836402	1.6607	0.0522372	0.0205485	0.000422293	1.07789	0.883975	0.85866	0.782923			1.73968	1.69345	3.07677	4.3356	4.96026	6.24731	689	8	6	8	8	8	8		1.31897	1.30133	1.75407	2.08221	2.22716	2.49946
Peri	0.052009	0.897533	0.0392866	0.0169633	0.000449613	0.919863	0.886736	0.658669	0.843357	0.0393103	0.0148301	0.000381189	0.872474	0.726625	0.659932	0.584438	0.0401308	0.0130152	0.000310487	0.781798	0.480302	0.666579	0.28403			1.22892	0.780078	2.2599	1.5258	3.64698	2.26641	689	3	1	5	3	6	3		1.10857	0.88322	1.5033	1.23523	1.90971	1.50546
Quad	0.052009	0.897533	0.0518266	0.019352	0.000374533	1.23951	1.12209	0.918275	1.25952	0.050971	0.0144417	0.00020964	1.09095	0.692406	0.915984	0.479767	0.051655	0.0122888	0.00015114	1.02321	0.492967	0.914798	0.243315			1.02371	1.16501	1.24286	1.25253	1.77529	1.94152	689	2	2	2	2	2	2		1.01178	1.07936	1.11484	1.11917	1.3324	1.39338
Square	0.052009	0.897533	0.0510251	0.0180749	0.00032767	1.21314	1.21732	0.871989	1.48252	0.0513471	0.0130814	0.000171561	0.976182	0.598434	0.836425	0.361857	0.0515777	0.00916079	8.4106e-05	0.889493	0.323908	0.834877	0.108842			0.895615	1.37128	1.01711	0.944705	0.98791	0.868502	689	1	4	1	1	1	1		0.946369	1.17102	1.00852	0.97196	0.993937	0.931935
OldEPI	0.052009	0.897533	0.0510767	0.02391	0.000572557	1.31609	1.38989	0.885567	1.93194	0.0516452	0.0215648	0.000465173	1.20527	1.15036	0.885823	1.32347	0.0513076	0.0195657	0.000383309	1.06637	0.688584	0.898222	0.474148			1.56496	1.78698	2.75781	3.45519	4.50235	3.78345	689	7	8	7	7	7	7		1.25098	1.33678	1.66066	1.85881	2.12187	1.94511
EPI3	0.052009	0.897533	0.0517473	0.0230017	0.000529147	1.32004	1.38902	0.913993	1.92965	0.0513421	0.0194809	0.00037995	1.16106	0.951478	0.922386	0.905928	0.0505466	0.0174155	0.000305438	1.05406	0.616075	0.939527	0.381312			1.44631	1.78486	2.25256	2.36512	3.58768	3.04267	689	5	7	4	4	5	5		1.20263	1.33599	1.50085	1.53789	1.89412	1.74432
EPI5	0.052009	0.897533	0.0511056	0.0220132	0.000485397	1.24463	1.1656	0.906667	1.35871	0.0509407	0.0189435	0.000359997	1.16028	1.01598	0.915823	1.03255	0.0514033	0.0163352	0.000267206	1.05939	0.583454	0.950954	0.343272			1.32673	1.25676	2.13427	2.69569	3.1386	2.73913	689	4	3	3	6	3	4		1.15184	1.12105	1.46091	1.64186	1.77161	1.65503
			population 50
	true	true	7							15							30
	mean	rr	mean	stdev	mse	mrr	srr	prr	mse_rr	mean	stdev	mse	mrr	srr	prr	mse_rr	mean	stdev	mse	mrr	srr	prr	mse_rr
Random	0.291289	1.10068	0.286292	0.0304884	0.000954512	1.15821	0.284553	1.11313	0.0811254	0.28702	0.0222993	0.000515483	1.12095	0.189231	1.10055	0.0358084	0.286953	0.0153809	0.000255373	1.11547	0.121767	1.10658	0.014862
NewEPI	0.291289	1.10068	0.289693	0.0332821	0.00111025	1.12295	0.285815	1.0785	0.0821822	0.287828	0.0251916	0.000646595	1.10971	0.206556	1.0842	0.042937	0.289325	0.0216871	0.000474187	1.11344	0.171588	1.09532	0.0294712			1.16315	1.01303	1.25435	1.19908	1.85684	1.98299	702	7	4	7	6	8	8		1.0785	1.00649	1.11998	1.09502	1.36266	1.40819
Grid	0.291289	1.10068	0.289784	0.0343646	0.00118319	1.12394	0.31	1.07145	0.0969544	0.291344	0.0264526	0.000699743	1.10053	0.219696	1.0707	0.0491651	0.290175	0.0212721	0.000453743	1.10532	0.162342	1.08876	0.026497			1.23958	1.19512	1.35745	1.37301	1.77679	1.78287	702	8	8	8	8	7	7		1.11336	1.09321	1.1651	1.17175	1.33296	1.33524
Peri	0.291289	1.10068	0.290388	0.0310722	0.000966293	1.06393	0.26833	1.02232	0.0781413	0.293557	0.0238898	0.000575866	1.08372	0.177307	1.06426	0.0327642	0.290417	0.0184021	0.000339398	1.08907	0.13775	1.07735	0.0195194			1.01234	0.963216	1.11714	0.914986	1.32903	1.31337	702	3	3	4	2	3	2		1.00615	0.981436	1.05695	0.956549	1.15283	1.14602
Quad	0.291289	1.10068	0.292949	0.0307904	0.000950804	1.04772	0.249832	1.01149	0.0703709	0.292201	0.0223036	0.000498282	1.04354	0.174074	1.02365	0.0362354	0.292644	0.0173759	0.000303758	1.04231	0.128646	1.03048	0.0214778			0.996115	0.867433	0.966632	1.01192	1.18947	1.44515	702	1	2	1	3	2	3		0.998056	0.931361	0.983174	1.00594	1.09063	1.20214
Square	0.291289	1.10068	0.286177	0.0306542	0.000965812	1.12545	0.262061	1.08568	0.068901	0.284121	0.02198	0.000534501	1.10846	0.17439	1.09083	0.0305089	0.284852	0.0157666	0.00029002	1.10259	0.126604	1.09306	0.0160866			1.01184	0.849314	1.03689	0.852004	1.13567	1.0824	702	2	1	2	1	1	1		1.0059	0.921582	1.01828	0.923041	1.06568	1.04038
OldEPI	0.291289	1.10068	0.29183	0.0319334	0.00102003	1.06966	0.291662	1.02084	0.0914411	0.291453	0.0248911	0.000619594	1.07167	0.205105	1.04451	0.0452231	0.289826	0.0193053	0.000374835	1.0809	0.154607	1.06482	0.0251893			1.06864	1.12716	1.20197	1.26292	1.46779	1.69488	702	4	7	6	7	6	6		1.03375	1.06168	1.09634	1.1238	1.21153	1.30187
EPI3	0.291289	1.10068	0.290629	0.0327602	0.00107367	1.10934	0.290889	1.05905	0.0863495	0.287683	0.0236837	0.000573921	1.11289	0.203349	1.08605	0.0415649	0.285559	0.0181646	0.000362786	1.11225	0.14937	1.09731	0.0223228			1.12483	1.06439	1.11337	1.16076	1.42061	1.502	702	5	5	3	5	4	5		1.06058	1.0317	1.05516	1.07738	1.19189	1.22556
EPI5	0.291289	1.10068	0.287407	0.0326722	0.00108254	1.11367	0.294367	1.06596	0.0878574	0.284772	0.0238768	0.000612573	1.11617	0.202924	1.09134	0.0412654	0.283853	0.0177902	0.000371785	1.12091	0.148819	1.10572	0.0221725			1.13413	1.08298	1.18835	1.15239	1.45585	1.49189	702	6	6	5	4	5	4		1.06496	1.04066	1.09011	1.0735	1.20659	1.22143
			population vanilla 1
	true	true	7							15							30
	mean	rr	mean	stdev	mse	mrr	srr	prr	mse_rr	mean	stdev	mse	mrr	srr	prr	mse_rr	mean	stdev	mse	mrr	srr	prr	mse_rr
Random	0.500982	1.00133	0.505002	0.0323366	0.00106182	1.01181	0.129455	1.00345	0.0167631	0.50386	0.0224061	0.000510316	1.00394	0.0934747	0.999415	0.00874119	0.503651	0.0158989	0.000259899	1.00087	0.0635416	0.998794	0.00404397
NewEPI	0.500982	1.00133	0.5042	0.0326024	0.00107327	1.00349	0.132449	0.994572	0.0175884	0.504287	0.022535	0.000518749	1.00536	0.0904326	1.00115	0.00817809	0.504643	0.0164185	0.00028297	1.00166	0.0639757	0.999574	0.00409597			1.01079	1.04923	1.01653	0.935581	1.08877	1.01286	715	4	4	3	2	6	1		1.00538	1.02432	1.00823	0.967254	1.04344	1.00641
Grid	0.500982	1.00133	0.5026	0.0340802	0.00116408	1.0063	0.135926	0.997611	0.0184897	0.501936	0.0231774	0.000538102	1.00477	0.0931866	1.00068	0.00868416	0.502269	0.0159874	0.000257253	1.00052	0.0646589	0.998528	0.00418862			1.09631	1.103	1.05445	0.993477	0.989822	1.03577	715	7	7	5	5	1	5		1.04705	1.05024	1.02686	0.996733	0.994898	1.01773
Peri	0.500982	1.00133	0.510534	0.0339903	0.00124658	0.997416	0.124432	0.989892	0.0156142	0.51165	0.0225403	0.000621871	0.968261	0.0889835	0.963956	0.00931488	0.508122	0.0162417	0.000314772	0.960046	0.0595182	0.958174	0.00540486			1.17401	0.93146	1.2186	1.06563	1.21114	1.33652	715	8	1	8	8	8	8		1.08352	0.965122	1.1039	1.03229	1.10052	1.15608
Quad	0.500982	1.00133	0.504006	0.0323649	0.00105663	1.00742	0.132183	0.998927	0.0174781	0.504144	0.0222521	0.000505154	1.00053	0.0918629	0.996399	0.00846311	0.503434	0.0163913	0.000274687	0.996011	0.0639394	0.993914	0.00414324			0.995117	1.04265	0.989885	0.968187	1.0569	1.02455	715	2	3	1	3	4	3		0.997556	1.0211	0.994929	0.983965	1.02806	1.0122
Square	0.500982	1.00133	0.501384	0.0338271	0.00114443	1.01373	0.13546	1.00465	0.0183604	0.501791	0.0226422	0.000513324	1.00338	0.0954662	0.99889	0.00911975	0.501809	0.0161796	0.000262463	1.00361	0.0662995	1.00143	0.00439563			1.07781	1.09529	1.00589	1.04331	1.00987	1.08696	715	6	5	2	7	2	7		1.03818	1.04656	1.00294	1.02142	1.00492	1.04257
OldEPI	0.500982	1.00133	0.502563	0.032847	0.00108142	1.01241	0.136771	1.00356	0.0187113	0.502845	0.0231915	0.000541316	1.00287	0.0944312	0.998544	0.00892501	0.502484	0.016171	0.000263757	0.999465	0.0643061	0.997346	0.00415115			1.01847	1.11622	1.06075	1.02103	1.01485	1.0265	715	5	8	6	6	3	4		1.00919	1.05651	1.02993	1.01046	1.0074	1.01317
EPI3	0.500982	1.00133	0.501814	0.0323046	0.00104428	1.01174	0.127077	1.00402	0.0161558	0.502517	0.022942	0.000528692	1.00156	0.0890726	0.997752	0.00794673	0.502654	0.0166316	0.000279406	0.999514	0.0642274	0.997492	0.00413989			0.983484	0.963772	1.03601	0.909113	1.07506	1.02372	715	1	2	4	1	5	2		0.991708	0.981719	1.01784	0.953474	1.03685	1.01179
EPI5	0.500982	1.00133	0.503975	0.0323792	0.00105737	1.00424	0.135628	0.995584	0.018428	0.503011	0.0240875	0.000584324	1.0057	0.0930385	1.00138	0.00865616	0.503816	0.0173297	0.00030835	1.00121	0.0653634	0.999045	0.0042776			0.995813	1.09932	1.14502	0.990273	1.18642	1.05777	715	3	6	7	4	7	6		0.997904	1.04848	1.07006	0.995125	1.08923	1.02848
			population vanilla 2
	true	true	7							15							30
	mean	rr	mean	stdev	mse	mrr	srr	prr	mse_rr	mean	stdev	mse	mrr	srr	prr	mse_rr	mean	stdev	mse	mrr	srr	prr	mse_rr
Random	0.095801	1.01604	0.0967394	0.0191842	0.000368914	1.11896	0.523581	1.01975	0.274151	0.0960328	0.0137922	0.000190278	1.06849	0.332259	1.02256	0.110439	0.0964806	0.00961522	9.29142e-05	1.04441	0.21428	1.02229	0.045955
NewEPI	0.095801	1.01604	0.0955113	0.0191795	0.000367937	1.1279	0.531473	1.03082	0.282682	0.0962753	0.0139189	0.000193961	1.07097	0.308088	1.02826	0.0950675	0.0957186	0.00993677	9.8746e-05	1.0456	0.214743	1.02416	0.0461805			0.997352	1.03112	1.01935	0.860818	1.06277	1.00491	728	5	6	7	2	7	5		0.998675	1.01544	1.00963	0.927803	1.03091	1.00245
Grid	0.095801	1.01604	0.0953268	0.0187787	0.000352864	1.08942	0.518442	0.987504	0.269596	0.096025	0.0134535	0.000181047	1.05088	0.32308	1.0034	0.10454	0.095939	0.00933897	8.72353e-05	1.04223	0.222311	1.01872	0.0494294			0.956495	0.983387	0.951483	0.946594	0.93888	1.0756	728	2	5	5	6	1	8		0.978005	0.991659	0.97544	0.972931	0.968958	1.03711
Peri	0.095801	1.01604	0.103049	0.0189227	0.000410602	0.835611	0.334807	0.784202	0.165845	0.0969795	0.0133883	0.000180635	0.869347	0.256931	0.83747	0.0979008	0.0968121	0.00978974	9.68613e-05	0.96755	0.198145	0.948399	0.0438367			1.113	0.604939	0.949321	0.886473	1.04248	0.953906	728	8	1	3	3	6	3		1.05499	0.777778	0.974331	0.941527	1.02102	0.976681
Quad	0.095801	1.01604	0.0954844	0.0188423	0.000355132	1.09136	0.493787	0.997013	0.244188	0.0953294	0.0128592	0.000165581	1.03328	0.326021	0.988797	0.107032	0.0949929	0.00949238	9.07582e-05	1.00711	0.207359	0.9872	0.0438295			0.962643	0.890705	0.870206	0.969153	0.976796	0.953749	728	3	4	1	7	3	2		0.981144	0.943772	0.932848	0.984456	0.98833	0.976601
Square	0.095801	1.01604	0.0962738	0.0186136	0.00034669	1.15271	0.538119	1.04269	0.290282	0.0959383	0.013329	0.000177681	1.07286	0.329183	1.0233	0.108414	0.0964016	0.00964416	9.33705e-05	1.04108	0.214123	1.02037	0.0458674			0.939757	1.05884	0.933795	0.981669	1.00491	0.998094	728	1	8	2	8	5	4		0.969411	1.029	0.966331	0.990792	1.00245	0.999047
OldEPI	0.095801	1.01604	0.0954492	0.0189728	0.000360091	1.07298	0.479564	0.984155	0.230998	0.0956528	0.0140441	0.000197259	1.03372	0.314392	0.994091	0.0993241	0.0960021	0.0102637	0.000105384	1.02896	0.218982	1.00728	0.0480299			0.976083	0.842596	1.03668	0.899361	1.13421	1.04515	728	4	3	8	5	8	6		0.987969	0.91793	1.01818	0.948346	1.06499	1.02233
EPI3	0.095801	1.01604	0.0950631	0.0196507	0.000386694	1.11799	0.537194	1.0203	0.288596	0.094968	0.0137665	0.00019021	1.0628	0.314657	1.01967	0.0990222	0.0952844	0.00963989	9.31942e-05	1.04182	0.219427	1.01887	0.0481562			1.0482	1.05269	0.999642	0.896627	1.00301	1.0479	728	7	7	6	4	4	7		1.02381	1.02601	0.999821	0.946904	1.00151	1.02367
EPI5	0.095801	1.01604	0.0956232	0.0195899	0.000383796	1.07613	0.472636	0.990465	0.224039	0.0960595	0.0134519	0.00018102	1.04424	0.302154	1.00273	0.0914742	0.0957739	0.00942158	8.87668e-05	1.02578	0.208417	1.00513	0.0435567			1.04034	0.81721	0.951345	0.828281	0.955363	0.947812	728	6	2	4	1	2	1		1.01997	0.903997	0.975369	0.9101	0.977427	0.973556
			population vanilla 3
	true	true	7							15							30
	mean	rr	mean	stdev	mse	mrr	srr	prr	mse_rr	mean	stdev	mse	mrr	srr	prr	mse_rr	mean	stdev	mse	mrr	srr	prr	mse_rr
Random	0.206178	0.997776	0.20882	0.0256184	0.000663283	1.0525	0.271968	1.02059	0.0744871	0.206694	0.0183173	0.00033579	1.02198	0.180266	1.00574	0.0325593	0.208045	0.0125445	0.00016085	1.02019	0.126961	1.01232	0.0163306
NewEPI	0.206178	0.997776	0.209495	0.0269122	0.000735269	1.04039	0.281115	1.0051	0.0790793	0.208902	0.0178481	0.000325975	1.0327	0.18935	1.01478	0.0361426	0.208695	0.0133531	0.00018464	1.02753	0.137344	1.01787	0.0192671			1.10853	1.06165	0.970771	1.11005	1.1479	1.17982	741	7	7	2	7	7	8		1.05287	1.03036	0.985277	1.05359	1.0714	1.08619
Grid	0.206178	0.997776	0.205475	0.0258271	0.000667533	1.0091	0.272559	0.973703	0.0748679	0.206145	0.0181822	0.000330593	1.00462	0.186367	0.987718	0.0348338	0.206103	0.0129537	0.000167804	1.00077	0.138121	0.991386	0.0191182			1.00641	1.00511	0.984525	1.06986	1.04323	1.1707	741	3	4	4	4	2	7		1.0032	1.00255	0.992232	1.03434	1.02139	1.08199
Peri	0.206178	0.997776	0.207197	0.0256109	0.000656956	0.962269	0.258116	0.931556	0.071009	0.201379	0.0181721	0.000353256	0.971372	0.182099	0.954659	0.0350191	0.201407	0.0130928	0.000194184	1.00398	0.124469	0.996083	0.0154954			0.990462	0.953306	1.05201	1.07555	1.20724	0.948855	741	2	2	7	5	8	1		0.99522	0.976374	1.02568	1.03709	1.09874	0.974092
Quad	0.206178	0.997776	0.206743	0.0254237	0.000646684	1.01623	0.260216	0.985371	0.0678663	0.206514	0.0181356	0.000329013	0.998073	0.193247	0.98043	0.0376453	0.205058	0.0128468	0.000166295	0.990805	0.126415	0.983463	0.0161856			0.974975	0.911114	0.979818	1.15621	1.03385	0.99112	741	1	1	3	8	1	3		0.987408	0.954523	0.989858	1.07527	1.01678	0.99555
Square	0.206178	0.997776	0.205962	0.0268637	0.000721705	1.03558	0.289325	0.996184	0.0837115	0.206083	0.0179185	0.000321082	1.01919	0.189601	1.00148	0.0359623	0.20666	0.0130325	0.000170078	1.01117	0.129721	1.00291	0.0168539			1.08808	1.12384	0.956199	1.10452	1.05737	1.03204	741	5	8	1	6	3	5		1.04311	1.06011	0.977854	1.05096	1.02829	1.01589
OldEPI	0.206178	0.997776	0.205725	0.0270098	0.000729734	1.02343	0.278654	0.987932	0.077745	0.205688	0.0191181	0.000365742	0.999317	0.183191	0.983752	0.0337556	0.206205	0.0134431	0.000180718	0.996371	0.134525	0.987702	0.0181985			1.10019	1.04374	1.0892	1.03674	1.12352	1.11438	741	6	6	8	2	6	6		1.0489	1.02163	1.04365	1.01821	1.05996	1.05564
EPI3	0.206178	0.997776	0.20631	0.0271362	0.000736391	1.02678	0.273763	0.994483	0.074957	0.205926	0.0187405	0.00035127	1.00321	0.185638	0.98769	0.0345632	0.2057	0.0133906	0.000179537	0.997123	0.127461	0.989316	0.0163179			1.11022	1.00631	1.0461	1.06155	1.11617	0.99922	741	8	5	6	3	5	4		1.05367	1.00315	1.02279	1.03031	1.05649	0.99961
EPI5	0.206178	0.997776	0.207434	0.0266356	0.000711033	1.01287	0.269044	0.979972	0.0727017	0.206183	0.018548	0.000344028	1.0017	0.176723	0.986124	0.0313668	0.206347	0.0133564	0.000178422	1.00028	0.125281	0.99231	0.0157252			1.07199	0.976031	1.02454	0.963375	1.10924	0.962927	741	4	3	5	1	4	2		1.03537	0.987943	1.01219	0.981517	1.05321	0.981289

## Sheet: RR=1.5
	Means of Ratios								Means of Ratios of Sqrts
	Prevalence			RR					Prevalence			RR
	n=7	n=15	n=30	n=7	n=15	n=30			n=7	n=15	n=30	n=7	n=15	n=30
NewEPI	1.46771	2.17024	3.67431	1.22604	1.62815	2.18627		enum	1.21857	1.47931	1.80895	1.09171	1.27246	1.39455
Grid	1.71935	2.61814	4.22004	1.43851	2.14145	2.82565		grid_epi	1.32056	1.62644	2.05687	1.17073	1.44766	1.65819
Peri	1.55568	2.20953	3.44201	1.10953	1.31466	1.71584		peri_epi	1.23165	1.46375	1.8125	1.03803	1.13716	1.29937
Quad	1.68282	2.46507	3.93265	0.989681	1.08216	1.39817		qtr_epi	1.26734	1.50176	1.86173	0.976914	1.02945	1.16806
Square	1.04131	1.08258	1.16998	0.969683	0.986889	1.01262		square_gps	1.0217	1.03789	1.0807	0.969331	0.992719	1.0057
OldEPI	2.14541	3.4629	5.73628	1.35875	1.73237	2.53785		strip_epi-s1	1.44864	1.81495	2.3118	1.14113	1.29853	1.56247
EPI3	2.06251	3.12801	4.8344	1.27312	1.60593	2.17239		strip_epi-s3	1.41669	1.72395	2.11516	1.10737	1.24817	1.44519
EPI5	1.97933	2.93422	4.36971	1.26233	1.49194	1.96532		strip_epi-s5	1.38923	1.66784	2.01496	1.11678	1.21324	1.3867
	Prevalence												RR
	n=7				n=15				n=30				n=7				n=15				n=30
	mean	min	max	stdev	mean	min	max	stdev	mean	min	max	stdev	mean	min	max	stdev	mean	min	max	stdev	mean	min	max	stdev
NewEPI	1.46771	0.954841	2.13711	0.293807	2.17024	1.04323	3.71551	0.686201	3.67431	0	22.8564	3.18894	1.22604	4.87708e-05	2.57141	0.39359	1.62815	0.793468	3.6758	0.591961	2.18627	0	7.79125	1.35403
Grid	1.71935	0.942638	3.20797	0.403087	2.61814	1.04354	5.59246	0.924186	4.22004	0.943094	10.4771	1.90743	1.43851	0.0015202	3.53767	0.622441	2.14145	0.892271	8.11369	1.22954	2.82565	0.960847	10.3921	1.76402
Peri	1.55568	0.974926	4.97231	0.734773	2.20953	0.906574	6.53159	1.29334	3.44201	0.909483	12.9812	2.45855	1.10953	0.146288	3.18939	0.517539	1.31466	0.602691	2.83896	0.51056	1.71584	0.628583	4.79743	0.780677
Quad	1.68282	0.857735	5.4391	1.04416	2.46507	0.986507	10.2375	2.10357	3.93265	0.913333	18.5856	4.06936	0.989681	0.369209	2.80164	0.414381	1.08216	0.483244	2.46051	0.377433	1.39817	0.452019	4.69533	0.651189
Square	1.04131	0.864404	1.43101	0.0930025	1.08258	0.838963	1.73187	0.170667	1.16998	0.790508	2.49161	0.275888	0.969683	0.0123959	1.75958	0.237916	0.986889	0.648218	1.32807	0.144394	1.01262	0.823297	1.33356	0.0966417
OldEPI	2.14541	0.900871	6.08739	1.18035	3.4629	1.06214	10.9369	2.41397	5.73628	0.926326	21.4907	4.64277	1.35875	0.0186334	3.54231	0.638967	1.73237	0.65365	5.03217	0.872399	2.53785	0.649154	8.06559	1.57359
EPI3	2.06251	0.951316	5.76685	1.15574	3.12801	0.988542	10.4603	2.21161	4.8344	0.977222	20.1011	4.06897	1.27312	0.513529	3.90227	0.613424	1.60593	0.610433	5.43511	0.854838	2.17239	0.400432	9.37155	1.40966
EPI5	1.97933	0.90555	5.64339	1.10437	2.93422	0.929812	10.0907	2.0844	4.36971	0.905047	18.4735	3.59105	1.26233	0.600473	2.61841	0.396705	1.49194	0.579821	2.97866	0.573896	1.96532	0.395916	5.00042	0.972966
	Frequency of Rank for n=7 (1 is lowest ratio, 8 is highest ratio)
	Prevalence								RR
rank	1	2	3	4	5	6	7	8	1	2	3	4	5	6	7	8
NewEPI	1	12	13	10	3	5	8	1	5	9	4	4	4	10	12	5
Grid	1	0	9	6	4	5	6	22	1	1	3	1	6	6	13	22
Peri	7	9	15	11	2	2	1	6	11	10	10	6	5	3	4	4
Quad	8	16	6	3	14	2	3	1	17	13	7	11	4	0	0	1
Square	34	11	5	1	1	1	0	0	13	12	9	3	8	3	5	0
OldEPI	1	2	0	1	5	11	18	15	2	3	3	9	9	10	6	11
EPI3	0	1	1	8	11	13	14	5	3	4	8	12	5	11	5	5
EPI5	1	2	4	13	13	14	3	3	1	1	9	7	12	10	8	5
	Frequency of Rank for n=15 (1 is lowest ratio, 8 is highest ratio)
	Prevalence								RR
rank	1	2	3	4	5	6	7	8	1	2	3	4	5	6	7	8
NewEPI	0	13	10	9	4	9	5	3	0	3	4	12	6	4	13	11
Grid	0	0	10	6	3	5	8	21	1	0	0	2	1	8	13	28
Peri	2	15	12	14	4	3	0	3	6	11	14	5	4	10	2	1
Quad	3	20	7	6	10	1	6	0	18	22	9	1	2	1	0	0
Square	46	4	1	0	0	0	1	1	26	12	6	3	2	3	1	0
OldEPI	0	0	0	2	3	9	15	24	0	3	2	5	9	14	12	8
EPI3	0	1	3	1	18	15	15	0	1	1	8	12	15	4	9	3
EPI5	2	0	10	15	11	11	3	1	1	1	10	13	14	9	3	2
	Frequency of Rank for n=30 (1 is lowest ratio, 8 is highest ratio)
	Prevalence								RR
rank	1	2	3	4	5	6	7	8	1	2	3	4	5	6	7	8
NewEPI	5	10	6	6	5	7	10	4	5	2	5	3	8	7	5	18
Grid	0	0	8	7	3	3	10	22	0	0	2	0	3	5	22	21
Peri	1	11	17	12	6	4	0	2	2	4	17	16	11	2	1	0
Quad	1	21	7	6	8	3	5	2	5	34	6	3	2	2	1	0
Square	45	4	1	2	0	1	0	0	36	5	6	3	1	0	1	1
OldEPI	0	1	0	0	5	12	13	22	0	0	1	5	7	15	16	9
EPI3	0	0	4	6	16	14	13	0	2	2	3	14	13	13	5	1
EPI5	1	6	10	14	10	9	2	1	3	6	13	9	8	9	2	3
																																	6	10	13	17	20	24
			population 1
	true	true	7							15							30
	mean	rr	mean	stdev	mse	mrr	srr	prr	mse_rr	mean	stdev	mse	mrr	srr	prr	mse_rr	mean	stdev	mse	mrr	srr	prr	mse_rr
Random	0.354545	1.43979	0.363001	0.0384232	0.00154785	1.43819	0.354421	1.37674	0.12959	0.362542	0.0282152	0.00086005	1.42773	0.242028	1.39773	0.0603466	0.363015	0.0187078	0.000421723	1.41955	0.167615	1.40479	0.0293198
NewEPI	0.354545	1.43979	0.365004	0.0435426	0.00200535	1.49454	0.390852	1.42682	0.152934	0.367594	0.0397757	0.00175238	1.46322	0.285812	1.42653	0.0818643	0.36566	0.0359685	0.00141728	1.44595	0.247271	1.41989	0.061539			1.29557	1.18014	2.03754	1.35657	3.36068	2.09889	65	6	6	7	5	7	6		1.13823	1.08634	1.42742	1.16472	1.83322	1.44875
Grid	0.354545	1.43979	0.369091	0.0466489	0.00238771	1.46594	0.365122	1.39935	0.134949	0.367413	0.0428006	0.00199748	1.45102	0.304991	1.4049	0.0942368	0.369122	0.0383585	0.00168386	1.41261	0.24895	1.38119	0.0654101			1.5426	1.04136	2.32251	1.56159	3.99282	2.23092	65	8	3	8	7	8	7		1.24201	1.02047	1.52398	1.24964	1.9982	1.49363
Peri	0.354545	1.43979	0.34396	0.0385367	0.00159712	1.43283	0.378437	1.36291	0.149125	0.352521	0.0318669	0.0010196	1.38902	0.263732	1.35104	0.0774311	0.347864	0.026706	0.000757846	1.37212	0.219454	1.34535	0.057079			1.03183	1.15075	1.18551	1.28311	1.79703	1.94677	65	3	5	3	3	3	5		1.01579	1.07273	1.08881	1.13274	1.34053	1.39527
Quad	0.354545	1.43979	0.359952	0.0360334	0.00132764	1.42095	0.33128	1.36511	0.115324	0.362494	0.0280678	0.000850988	1.4073	0.238868	1.37619	0.0611029	0.362262	0.0234469	0.000609309	1.37254	0.18167	1.35435	0.040304			0.857735	0.889914	0.989464	1.01253	1.44481	1.37463	65	1	2	2	2	2	2		0.92614	0.943352	0.994718	1.00625	1.202	1.17245
Square	0.354545	1.43979	0.365899	0.0382584	0.00159262	1.44298	0.317506	1.39444	0.102867	0.364789	0.0271031	0.000839517	1.43905	0.236377	1.41074	0.056718	0.364297	0.0199856	0.000494526	1.42645	0.160332	1.41292	0.0264283			1.02893	0.793788	0.976127	0.939871	1.17263	0.901383	65	2	1	1	1	1	1		1.01436	0.890948	0.987991	0.969469	1.08288	0.949412
OldEPI	0.354545	1.43979	0.362511	0.0442813	0.00202429	1.42458	0.398764	1.34537	0.167928	0.359219	0.0385427	0.00150739	1.40987	0.3204	1.35588	0.109697	0.358877	0.0342975	0.00119508	1.38696	0.250981	1.35378	0.0703892			1.30781	1.29584	1.75267	1.81778	2.83382	2.40074	65	7	8	6	8	6	8		1.1436	1.13835	1.32389	1.34825	1.68339	1.54943
EPI3	0.354545	1.43979	0.358771	0.0419369	0.00177656	1.42175	0.366064	1.35938	0.140469	0.359087	0.0357606	0.00129945	1.38559	0.267548	1.34897	0.0798302	0.359869	0.0312971	0.00100785	1.38291	0.20751	1.36294	0.0489663			1.14776	1.08395	1.5109	1.32286	2.38985	1.67008	65	5	4	5	4	5	4		1.07134	1.04113	1.22919	1.15016	1.54591	1.29231
EPI5	0.354545	1.43979	0.360156	0.04155	0.00175789	1.40305	0.383935	1.33811	0.157745	0.359646	0.0354456	0.00128241	1.38504	0.274471	1.3492	0.0835409	0.357776	0.0301739	0.000920903	1.40936	0.204194	1.39235	0.0439457			1.1357	1.21727	1.49109	1.38435	2.18367	1.49884	65	4	7	4	6	4	3		1.06569	1.1033	1.2211	1.17658	1.47773	1.22427
			population 2
	true	true	7							15							30
	mean	rr	mean	stdev	mse	mrr	srr	prr	mse_rr	mean	stdev	mse	mrr	srr	prr	mse_rr	mean	stdev	mse	mrr	srr	prr	mse_rr
Random	0.448612	1.54407	0.449408	0.036147	0.00130724	1.57628	0.259516	1.54543	0.0673504	0.449437	0.0250222	0.000626791	1.55507	0.189737	1.53859	0.0360302	0.447915	0.0178576	0.00031938	1.54976	0.127679	1.54204	0.016306
NewEPI	0.448612	1.54407	0.446744	0.0424776	0.00180784	1.57704	0.298421	1.53893	0.0890815	0.447453	0.0348583	0.00121644	1.56752	0.221157	1.54495	0.0489112	0.447314	0.032397	0.00105125	1.55988	0.18384	1.5449	0.0337978			1.38294	1.32266	1.94075	1.35751	3.29154	2.07272	78	5	6	6	5	7	6		1.17599	1.15007	1.39311	1.16512	1.81426	1.43969
Grid	0.448612	1.54407	0.442135	0.0449359	0.00206119	1.48739	0.285385	1.45066	0.09017	0.441381	0.0368346	0.00140908	1.47268	0.220233	1.44958	0.0574309	0.440559	0.0327681	0.0011386	1.46541	0.184667	1.44933	0.0430776			1.57675	1.33882	2.24808	1.59397	3.56503	2.64182	78	8	7	8	8	8	8		1.25569	1.15707	1.49936	1.26252	1.88813	1.62537
Peri	0.448612	1.54407	0.449228	0.036532	0.00133497	1.46187	0.249904	1.43187	0.0750408	0.441468	0.0292672	0.000907606	1.4294	0.183072	1.41298	0.0506999	0.436831	0.0254794	0.000787992	1.41805	0.141308	1.40845	0.0383607			1.02121	1.11419	1.44802	1.40715	2.46726	2.35255	78	1	3	2	7	4	7		1.01055	1.05555	1.20334	1.18623	1.57075	1.5338
Quad	0.448612	1.54407	0.464243	0.0355289	0.00150663	1.47745	0.24726	1.44901	0.0701739	0.467471	0.027635	0.00111936	1.46233	0.16753	1.44847	0.0372057	0.464982	0.0209057	0.000705025	1.4572	0.129529	1.44882	0.0258503			1.15253	1.04192	1.78585	1.03263	2.20748	1.58532	78	2	1	4	2	2	2		1.07356	1.02075	1.33636	1.01618	1.48576	1.2591
Square	0.448612	1.54407	0.436335	0.0368985	0.00151222	1.53468	0.265409	1.50275	0.0721493	0.437421	0.0237992	0.00069164	1.51734	0.181846	1.50224	0.0348177	0.436998	0.0181162	0.000463082	1.51006	0.125873	1.50274	0.0175522			1.15681	1.07125	1.10346	0.966349	1.44994	1.07642	78	3	2	1	1	1	1		1.07555	1.03501	1.05046	0.983031	1.20413	1.03751
OldEPI	0.448612	1.54407	0.46391	0.041037	0.00191806	1.48868	0.285235	1.45015	0.09018	0.464134	0.0335679	0.00136774	1.46404	0.198168	1.44461	0.0491628	0.462718	0.0281668	0.000992348	1.46314	0.158194	1.45093	0.0337004			1.46726	1.33897	2.18212	1.36449	3.10711	2.06674	78	7	8	7	6	6	5		1.21131	1.15714	1.4772	1.16811	1.7627	1.43762
EPI3	0.448612	1.54407	0.462645	0.0402467	0.00181672	1.47949	0.269911	1.44507	0.0826529	0.459259	0.0322574	0.0011539	1.4811	0.201598	1.46188	0.0473969	0.45743	0.0279705	0.000860106	1.4864	0.158066	1.47421	0.0298653			1.38974	1.22721	1.84096	1.31548	2.69305	1.83155	78	6	5	5	4	5	4		1.17887	1.10779	1.35682	1.14694	1.64105	1.35335
EPI5	0.448612	1.54407	0.461843	0.0389297	0.00169058	1.48965	0.262289	1.45791	0.0762191	0.458506	0.0318376	0.00111152	1.49531	0.194299	1.47782	0.0421412	0.45453	0.0268817	0.000757648	1.50847	0.15465	1.49753	0.0260826			1.29325	1.13168	1.77336	1.16961	2.37225	1.59957	78	4	4	3	3	3	3		1.13721	1.0638	1.33167	1.08148	1.54021	1.26474
			population 3
	true	true	7							15							30
	mean	rr	mean	stdev	mse	mrr	srr	prr	mse_rr	mean	stdev	mse	mrr	srr	prr	mse_rr	mean	stdev	mse	mrr	srr	prr	mse_rr
Random	0.16653	1.53798	0.159061	0.0259329	0.000728301	1.67892	0.810179	1.48452	0.659248	0.159472	0.018584	0.00039518	1.59042	0.450516	1.508	0.203863	0.159663	0.0122823	0.00019801	1.5337	0.283447	1.49621	0.0820869
NewEPI	0.16653	1.53798	0.162834	0.0270135	0.000743389	1.62974	0.75794	1.44161	0.58376	0.161707	0.0208242	0.000456909	1.52233	0.459632	1.42997	0.222928	0.162797	0.0166255	0.000290342	1.4981	0.335777	1.44593	0.121219			1.02072	0.885494	1.1562	1.09351	1.4663	1.47672	91	3	2	3	2	3	2		1.01031	0.941007	1.07527	1.04571	1.21091	1.2152
Grid	0.16653	1.53798	0.174484	0.0297383	0.000947632	1.91152	1.11936	1.5723	1.25414	0.173452	0.0237758	0.000613203	1.72186	0.802177	1.56656	0.644305	0.173068	0.0193088	0.000415575	1.64381	0.447553	1.56077	0.200823			1.30115	1.90239	1.5517	3.16047	2.09875	2.44647	91	8	5	7	8	7	8		1.14068	1.37927	1.24567	1.77777	1.44871	1.56412
Peri	0.16653	1.53798	0.164565	0.0269513	0.000730234	1.73898	1.12737	1.43961	1.28064	0.166107	0.0197811	0.000391471	1.53265	0.529385	1.42201	0.293698	0.171184	0.016082	0.00028029	1.51207	0.339898	1.45749	0.122009			1.00265	1.94258	0.990613	1.44066	1.41553	1.48634	91	2	6	2	3	2	3		1.00133	1.39376	0.995296	1.20027	1.18976	1.21916
Quad	0.16653	1.53798	0.178268	0.0259222	0.000809741	1.843	1.19615	1.56432	1.43147	0.176607	0.0191252	0.000467319	1.68933	0.567248	1.55721	0.32214	0.177358	0.0142908	0.000321472	1.63436	0.373109	1.57284	0.140426			1.11182	2.17137	1.18255	1.58018	1.62351	1.71069	91	4	8	4	5	4	4		1.05443	1.47356	1.08745	1.25705	1.27417	1.30793
Square	0.16653	1.53798	0.1618	0.0246409	0.000629547	1.68818	0.680637	1.5229	0.463494	0.161321	0.0174473	0.000331542	1.60973	0.447448	1.52759	0.200318	0.162066	0.0123748	0.000173063	1.58982	0.294345	1.5504	0.0867932			0.864404	0.703065	0.838963	0.982607	0.874009	1.05733	91	1	1	1	1	1	1		0.929734	0.83849	0.915949	0.991265	0.934884	1.02827
OldEPI	0.16653	1.53798	0.177187	0.0282948	0.000914167	1.8669	1.193	1.53068	1.4233	0.1775	0.0228861	0.000644114	1.64895	0.574497	1.52181	0.330308	0.178635	0.0185414	0.000490315	1.62358	0.404866	1.55253	0.164128			1.2552	2.15898	1.62993	1.62024	2.47621	1.99944	91	7	7	8	6	8	7		1.12036	1.46935	1.27669	1.27289	1.5736	1.41402
EPI3	0.16653	1.53798	0.177998	0.0275682	0.000891521	1.80829	0.974322	1.52575	0.949453	0.179099	0.0210237	0.000599976	1.65148	0.549887	1.52615	0.302516	0.176753	0.0159533	0.000359017	1.62802	0.391012	1.56119	0.153429			1.22411	1.44021	1.51823	1.48391	1.81312	1.8691	91	6	3	6	4	6	5		1.10639	1.20009	1.23217	1.21816	1.34652	1.36715
EPI5	0.16653	1.53798	0.177193	0.0274653	0.000868042	1.8067	1.02145	1.54529	1.04341	0.176673	0.0205002	0.000523139	1.72099	0.589729	1.59637	0.35119	0.175511	0.0163685	0.000348586	1.67467	0.388782	1.61818	0.157583			1.19187	1.58273	1.3238	1.72267	1.76044	1.91971	91	5	4	5	7	5	6		1.09173	1.25807	1.15056	1.31251	1.32682	1.38554
			population 4
	true	true	7							15							30
	mean	rr	mean	stdev	mse	mrr	srr	prr	mse_rr	mean	stdev	mse	mrr	srr	prr	mse_rr	mean	stdev	mse	mrr	srr	prr	mse_rr
Random	0.147883	1.62729	0.150403	0.0280842	0.000795073	1.90117	0.763978	1.74733	0.598072	0.149181	0.0204448	0.000419675	1.81687	0.469007	1.74362	0.2335	0.150106	0.0146472	0.000219482	1.82109	0.330696	1.78458	0.1341
NewEPI	0.147883	1.62729	0.152226	0.0347546	0.00122674	1.96422	0.816943	1.79012	0.693909	0.152977	0.0305719	0.00096059	1.88468	0.591046	1.78953	0.375657	0.153276	0.0279323	0.000809298	1.82013	0.44439	1.76692	0.216979			1.54293	1.16024	2.28889	1.60881	3.68731	1.61804	104	3	6	3	7	3	7		1.24215	1.07715	1.51291	1.26839	1.92024	1.27202
Grid	0.147883	1.62729	0.161261	0.0372532	0.00156677	1.93657	0.812427	1.76314	0.678493	0.160728	0.0339689	0.00131888	1.89738	0.606788	1.79381	0.395921	0.162267	0.0321875	0.00124293	1.82947	0.475938	1.7678	0.24626			1.9706	1.13447	3.14263	1.69559	5.66303	1.83639	104	4	5	4	8	4	8		1.40378	1.06511	1.77275	1.30215	2.37971	1.35514
Peri	0.147883	1.62729	0.159078	0.0278373	0.000900243	1.81871	0.686863	1.67006	0.47361	0.161088	0.0223277	0.000672898	1.71009	0.411605	1.6487	0.169877	0.164163	0.0203176	0.000677843	1.70446	0.309798	1.66991	0.0977913			1.13228	0.791895	1.60338	0.727524	3.08838	0.729241	104	2	1	2	1	2	1		1.06409	0.889885	1.26625	0.85295	1.75738	0.853956
Quad	0.147883	1.62729	0.181755	0.0300127	0.00204807	1.88272	0.687885	1.74502	0.487046	0.180358	0.0230547	0.00158614	1.78685	0.448888	1.71872	0.20986	0.179361	0.0187387	0.001342	1.78868	0.290399	1.75807	0.101435			2.57596	0.81436	3.77946	0.898757	6.11441	0.756413	104	5	2	5	2	5	2		1.60498	0.902419	1.94408	0.948028	2.47273	0.86972
Square	0.147883	1.62729	0.153823	0.0293399	0.000896113	1.94192	0.842306	1.77156	0.730293	0.153941	0.0210193	0.00047851	1.87492	0.485949	1.79713	0.264992	0.152988	0.0146471	0.000240598	1.83857	0.332168	1.79869	0.139714			1.12708	1.22108	1.14019	1.13487	1.09621	1.04186	104	1	7	1	3	1	3		1.06164	1.10502	1.0678	1.0653	1.047	1.02072
OldEPI	0.147883	1.62729	0.180205	0.0362429	0.00235826	1.87185	0.721447	1.73442	0.531963	0.182836	0.0331152	0.00231833	1.83753	0.520022	1.76122	0.28836	0.183832	0.030574	0.0022271	1.78142	0.420372	1.72848	0.186952			2.96609	0.889463	5.52411	1.23495	10.1471	1.39412	104	6	3	8	4	8	5		1.72223	0.943113	2.35034	1.11128	3.18545	1.18073
EPI3	0.147883	1.62729	0.182434	0.0363217	0.00251304	1.88104	0.809767	1.72838	0.665942	0.180613	0.0317617	0.00208006	1.86382	0.53056	1.78023	0.304885	0.181589	0.027899	0.00191445	1.82092	0.391252	1.77831	0.175885			3.16076	1.11348	4.95636	1.30571	8.72257	1.3116	104	7	4	6	5	6	4		1.77785	1.05522	2.22629	1.14268	2.9534	1.14525
EPI5	0.147883	1.62729	0.183191	0.0358173	0.00252953	1.99385	0.870562	1.82243	0.795958	0.182792	0.0307941	0.00216691	1.92145	0.541217	1.84073	0.338472	0.182243	0.0273527	0.00192878	1.85646	0.399439	1.81336	0.194174			3.18151	1.33087	5.16332	1.44956	8.78787	1.44798	104	8	8	7	6	7	6		1.78368	1.15363	2.27229	1.20398	2.96443	1.20332
			population 5
	true	true	7							15							30
	mean	rr	mean	stdev	mse	mrr	srr	prr	mse_rr	mean	stdev	mse	mrr	srr	prr	mse_rr	mean	stdev	mse	mrr	srr	prr	mse_rr
Random	0.0845274	1.59246	0.0865081	0.0227839	0.000523029	2.00009	1.49737	1.53468	2.24546	0.085681	0.0162427	0.000265156	1.82378	1.17581	1.58876	1.38254	0.086022	0.0114094	0.000132408	1.67612	0.463944	1.59036	0.215248
NewEPI	0.0845274	1.59246	0.0891346	0.0312222	0.000996052	2.09497	1.59003	1.60338	2.52831	0.0883668	0.0292441	0.000869958	2.26346	1.9525	1.61753	3.81288	0.0859674	0.0270483	0.000733684	1.9625	1.29482	1.57019	1.67705			1.90439	1.12597	3.28093	2.75788	5.54108	7.79125	117	8	5	8	7	8	5		1.38	1.06112	1.81133	1.66069	2.35395	2.79128
Grid	0.0845274	1.59246	0.0869254	0.031327	0.000987131	2.12868	1.79864	1.53629	3.23826	0.0865591	0.0293873	0.000867741	2.31539	2.14382	1.53343	4.59945	0.0856303	0.026933	0.000726603	2.07007	1.49528	1.56045	2.23689			1.88734	1.44214	3.27257	3.3268	5.4876	10.3921	117	7	8	7	8	7	8		1.3738	1.20089	1.80902	1.82395	2.34256	3.22368
Peri	0.0845274	1.59246	0.075006	0.0245209	0.000691931	1.5855	1.1897	1.22833	1.54798	0.0721177	0.0213646	0.000610447	1.54674	1.15706	1.18473	1.50503	0.0751542	0.0196706	0.000474789	1.45744	0.93739	1.20011	1.03264			1.32293	0.689382	2.30222	1.0886	3.5858	4.79743	117	3	1	3	2	3	4		1.15019	0.83029	1.51731	1.04336	1.89362	2.1903
Quad	0.0845274	1.59246	0.0801933	0.0223846	0.000519855	1.8558	1.44629	1.37538	2.13888	0.0801844	0.0183384	0.000355159	1.68123	1.27483	1.3153	1.70201	0.0812235	0.0154493	0.000249596	1.54797	0.964864	1.31015	1.01066			0.993931	0.952537	1.33943	1.23107	1.88505	4.69533	117	2	2	2	3	2	3		0.996961	0.97598	1.15734	1.10954	1.37297	2.16687
Square	0.0845274	1.59246	0.0870393	0.0216735	0.00047605	2.07888	1.6895	1.54377	2.85678	0.0857481	0.0158313	0.00025212	1.81574	1.03737	1.56746	1.07676	0.0862549	0.0110745	0.000125629	1.67016	0.535225	1.56838	0.287046			0.910179	1.27225	0.950837	0.778827	0.948798	1.33356	117	1	7	1	1	1	1		0.954033	1.12794	0.975109	0.882512	0.974063	1.1548
OldEPI	0.0845274	1.59246	0.0794054	0.0289921	0.000866777	1.81475	1.59141	1.28916	2.62458	0.0785162	0.0264177	0.000734029	1.87163	1.77501	1.28818	3.24325	0.078974	0.0245846	0.000635243	1.72675	1.29087	1.32834	1.7361			1.65722	1.16884	2.76829	2.34586	4.79761	8.06559	117	6	6	6	6	6	6		1.28733	1.08113	1.66382	1.53162	2.19034	2.84
EPI3	0.0845274	1.59246	0.078164	0.0284958	0.000852503	1.7494	1.4311	1.27428	2.14929	0.0784651	0.0250754	0.000665527	1.80721	1.47575	1.33344	2.24493	0.0794049	0.0227432	0.000543493	1.62638	1.39622	1.33211	2.01721			1.62993	0.957171	2.50995	1.62377	4.10468	9.37155	117	5	3	5	5	5	7		1.27669	0.978351	1.58428	1.27427	2.026	3.0613
EPI5	0.0845274	1.59246	0.0780655	0.027539	0.000800153	1.88671	1.53229	1.39327	2.38759	0.0789577	0.0247304	0.000642614	1.82361	1.45617	1.35901	2.17493	0.0793045	0.0223746	0.000527901	1.60436	0.94137	1.35881	0.94077			1.52984	1.0633	2.42353	1.57314	3.98692	4.37062	117	4	4	4	4	4	2		1.23687	1.03116	1.55677	1.25425	1.99673	2.0906
			population 6
	true	true	7							15							30
	mean	rr	mean	stdev	mse	mrr	srr	prr	mse_rr	mean	stdev	mse	mrr	srr	prr	mse_rr	mean	stdev	mse	mrr	srr	prr	mse_rr
Random	0.289981	1.76692	0.291067	0.035407	0.00125483	1.76078	0.470911	1.68801	0.227984	0.292172	0.0251347	0.000636554	1.73925	0.291959	1.70734	0.0887898	0.292303	0.0173716	0.000307164	1.728	0.198485	1.71235	0.0423742
NewEPI	0.289981	1.76692	0.293027	0.0503672	0.00254613	1.78303	0.554406	1.67847	0.315189	0.292162	0.0428687	0.00184248	1.74926	0.446856	1.6814	0.206994	0.292071	0.0412412	0.0017052	1.73557	0.39239	1.68204	0.161175			2.02906	1.38251	2.89447	2.33128	5.55145	3.8036	130	7	3	6	4	6	6		1.42445	1.1758	1.70131	1.52685	2.35615	1.95028
Grid	0.289981	1.76692	0.274788	0.0509694	0.00282871	1.92531	0.646613	1.7998	0.419189	0.273602	0.0464749	0.00242819	1.86865	0.514749	1.783	0.265225	0.272302	0.0437665	0.00222805	1.84552	0.443209	1.78167	0.196652			2.25425	1.83868	3.81459	2.98711	7.25363	4.64084	130	8	8	8	8	8	8		1.50141	1.35598	1.9531	1.72833	2.69326	2.15426
Peri	0.289981	1.76692	0.26342	0.038574	0.00219344	1.94098	0.621339	1.82423	0.389347	0.267969	0.0315733	0.0014814	1.85032	0.465592	1.77699	0.216877	0.265153	0.0285643	0.00143235	1.75481	0.362182	1.70768	0.134685			1.74799	1.70778	2.32722	2.44259	4.66314	3.17847	130	4	7	3	6	4	4		1.32212	1.30682	1.52552	1.56288	2.15943	1.78283
Quad	0.289981	1.76692	0.291367	0.0378342	0.00143335	1.74474	0.432958	1.67616	0.19569	0.291364	0.0298722	0.000894261	1.69968	0.32082	1.66081	0.114185	0.293882	0.0266416	0.000724993	1.69925	0.254165	1.6738	0.0732712			1.14226	0.85835	1.40485	1.28601	2.36028	1.72915	130	1	2	2	2	2	2		1.06877	0.926472	1.18526	1.13402	1.53632	1.31497
Square	0.289981	1.76692	0.2749	0.0355292	0.00148976	1.75197	0.427623	1.68555	0.189483	0.275544	0.0256239	0.000865011	1.72562	0.306715	1.69082	0.0998653	0.277131	0.0177175	0.000479032	1.70596	0.208292	1.69034	0.0492501			1.18722	0.831122	1.3589	1.12474	1.55953	1.16227	130	2	1	1	1	1	1		1.08959	0.911659	1.16572	1.06054	1.24881	1.07808
OldEPI	0.289981	1.76692	0.290214	0.0495463	0.00245489	1.7661	0.580733	1.65989	0.348706	0.289408	0.0443521	0.00196744	1.74809	0.480691	1.67099	0.240266	0.286025	0.0412342	0.00171591	1.75898	0.425029	1.69622	0.185648			1.95635	1.52952	3.09076	2.70601	5.5863	4.38116	130	6	5	7	7	7	7		1.39869	1.23674	1.75806	1.645	2.36353	2.09312
EPI3	0.289981	1.76692	0.287966	0.047532	0.00226335	1.77395	0.575895	1.66996	0.341056	0.284631	0.042216	0.00181081	1.76644	0.45961	1.69281	0.216734	0.283591	0.0379262	0.00147923	1.76439	0.368652	1.71754	0.138343			1.8037	1.49597	2.84471	2.44097	4.81576	3.26479	130	5	4	5	5	5	5		1.34302	1.2231	1.68663	1.56236	2.19448	1.80687
EPI5	0.289981	1.76692	0.283235	0.0461828	0.00217836	1.82527	0.615721	1.71244	0.38208	0.283184	0.0411062	0.00173592	1.77946	0.440411	1.71414	0.196748	0.283278	0.0359757	0.00133918	1.77858	0.341431	1.73839	0.117389			1.73597	1.67591	2.72706	2.21588	4.35982	2.7703	130	3	6	4	3	3	3		1.31756	1.29457	1.65138	1.48858	2.08802	1.66442
			population 7
	true	true	7							15							30
	mean	rr	mean	stdev	mse	mrr	srr	prr	mse_rr	mean	stdev	mse	mrr	srr	prr	mse_rr	mean	stdev	mse	mrr	srr	prr	mse_rr
Random	0.0487313	1.34272	0.0476968	0.0146654	0.000216144	1.37836	0.838142	1.28766	0.705514	0.0484564	0.0107887	0.000116471	1.69631	1.27358	1.24437	1.63168	0.0476311	0.00761837	5.92499e-05	1.58715	1.11172	1.24605	1.24527
NewEPI	0.0487313	1.34272	0.0488728	0.0158947	0.000252661	1.33416	0.841289	1.20402	0.727005	0.0491449	0.0114037	0.000130215	1.5841	1.19295	1.14818	1.46098	0.0487695	0.0100137	0.000100276	1.65471	1.2554	1.26844	1.58155			1.16895	1.03046	1.118	0.895382	1.69242	1.27005	143	7	3	4	4	6	8		1.08118	1.01512	1.05736	0.946246	1.30093	1.12696
Grid	0.0487313	1.34272	0.0482736	0.0166518	0.000277492	-nan	-nan	1.28015	0.003915	0.0480799	0.0126334	0.000160027	1.79369	1.41821	1.28236	2.01496	0.0478456	0.0102081	0.00010499	1.7208	1.2326	1.28635	1.52248			1.28383	0.00554916	1.37396	1.2349	1.77198	1.22261	143	8	1	8	8	8	6		1.13306	0.0744927	1.17216	1.11126	1.33116	1.10572
Peri	0.0487313	1.34272	0.0464926	0.0146141	0.000218584	1.28066	0.880642	1.13748	0.817654	0.0486613	0.0116242	0.000135127	1.74447	1.25442	1.26321	1.57989	0.0482684	0.00932177	8.71095e-05	1.66316	1.21091	1.26107	1.47297			1.01129	1.15895	1.16017	0.968261	1.47021	1.18286	143	2	8	5	6	5	5		1.00563	1.07654	1.07711	0.984003	1.21252	1.08759
Quad	0.0487313	1.34272	0.047539	0.0146541	0.000216164	1.25873	0.850716	1.16669	0.754704	0.0469101	0.0105633	0.0001149	1.54132	1.11612	1.12911	1.29135	0.0475244	0.00789696	6.38185e-05	1.53863	1.0694	1.17848	1.17059			1.00009	1.06972	0.986507	0.791426	1.07711	0.940033	143	1	4	2	1	2	1		1.00005	1.03427	0.993231	0.889621	1.03784	0.969553
Square	0.0487313	1.34272	0.0470317	0.0147523	0.000220519	1.34125	0.864268	1.23096	0.759449	0.0471239	0.010573	0.000114372	1.74442	1.33264	1.24432	1.78561	0.0461965	0.00748675	6.24766e-05	1.62862	1.24385	1.24305	1.5571			1.02024	1.07645	0.981974	1.09434	1.05446	1.25041	143	3	5	1	7	1	7		1.01007	1.03752	0.990946	1.04611	1.02687	1.11822
OldEPI	0.0487313	1.34272	0.0466167	0.0150479	0.000230911	1.25128	0.842995	1.21749	0.726323	0.0468224	0.0123703	0.000156668	1.57013	1.16097	1.17234	1.37688	0.0468667	0.00987352	0.000100963	1.59574	1.19667	1.19521	1.45378			1.06832	1.0295	1.34512	0.843843	1.70402	1.16744	143	5	2	7	2	7	4		1.0336	1.01464	1.15979	0.918609	1.30538	1.08048
EPI3	0.0487313	1.34272	0.046498	0.0156694	0.000250518	1.24313	0.874551	1.16696	0.795731	0.0465316	0.0114731	0.000136471	1.59742	1.23489	1.18644	1.54938	0.0466233	0.00870781	8.02695e-05	1.59155	1.1355	1.23271	1.30146			1.15903	1.12787	1.17171	0.94956	1.35476	1.04513	143	6	6	6	5	3	3		1.07658	1.06201	1.08245	0.974454	1.16394	1.02231
EPI5	0.0487313	1.34272	0.0469252	0.0148657	0.000224251	1.30805	0.887986	1.23615	0.799876	0.0466684	0.0111721	0.000129071	1.69465	1.2055	1.28079	1.45707	0.0465452	0.00869814	8.04366e-05	1.63322	1.13184	1.27759	1.2853			1.03751	1.13375	1.10818	0.892986	1.35758	1.03215	143	4	7	3	3	4	2		1.01858	1.06478	1.0527	0.944979	1.16515	1.01595
			population 8
	true	true	7							15							30
	mean	rr	mean	stdev	mse	mrr	srr	prr	mse_rr	mean	stdev	mse	mrr	srr	prr	mse_rr	mean	stdev	mse	mrr	srr	prr	mse_rr
Random	0.295123	1.57864	0.290668	0.0345555	0.00121393	1.79714	0.713383	1.61848	0.510503	0.292155	0.0243421	0.000601347	1.75246	0.454145	1.66765	0.21417	0.291847	0.017045	0.000301264	1.66765	0.281177	1.63007	0.0817056
NewEPI	0.295123	1.57864	0.297383	0.0471239	0.00222577	1.89597	1.14483	1.62418	1.31271	0.293831	0.0427447	0.00182878	1.69002	0.597864	1.56202	0.357718	0.299655	0.0430435	0.00187328	1.69767	0.56424	1.58063	0.318371			1.83352	2.57141	3.04114	1.67025	6.21807	3.89656	156	5	7	6	6	7	8		1.35408	1.60356	1.74389	1.29238	2.49361	1.97397
Grid	0.295123	1.57864	0.291817	0.051755	0.00268951	1.81755	1.28468	1.48478	1.65921	0.292265	0.0471749	0.00223364	1.67798	0.777173	1.49501	0.610992	0.292033	0.0439112	0.00193774	1.61451	0.528981	1.50594	0.285106			2.21554	3.25016	3.71439	2.85283	6.43204	3.48943	156	8	8	8	8	8	7		1.48847	1.80282	1.92728	1.68903	2.53615	1.868
Peri	0.295123	1.57864	0.273275	0.0353168	0.00172461	1.53958	0.859642	1.33992	0.795972	0.270209	0.0325234	0.00167848	1.43378	0.474345	1.32057	0.291603	0.2728	0.0284497	0.0013077	1.3884	0.370931	1.31392	0.207666			1.42068	1.55919	2.7912	1.36155	4.34072	2.54164	156	3	2	4	3	4	5		1.19192	1.24868	1.67069	1.16685	2.08344	1.59425
Quad	0.295123	1.57864	0.301207	0.0374641	0.00144057	1.63904	0.698521	1.45633	0.502891	0.301484	0.0296888	0.000921887	1.57346	0.440866	1.47925	0.204241	0.304638	0.0247712	0.000704147	1.55346	0.341924	1.48841	0.125053			1.1867	0.985091	1.53304	0.953639	2.33731	1.53054	156	2	1	2	2	2	3		1.08936	0.992517	1.23816	0.976544	1.52883	1.23715
Square	0.295123	1.57864	0.288588	0.0346614	0.00124412	1.78703	0.947766	1.58195	0.898271	0.288564	0.024306	0.000633802	1.67767	0.410297	1.60128	0.168856	0.288099	0.0173874	0.000351658	1.63828	0.272811	1.60212	0.0749772			1.02487	1.75958	1.05397	0.78842	1.16728	0.917651	156	1	3	1	1	1	1		1.01236	1.32649	1.02663	0.88793	1.08041	0.957941
OldEPI	0.295123	1.57864	0.30405	0.0479758	0.00238137	1.76728	1.12936	1.47754	1.28568	0.304676	0.043382	0.00197326	1.65994	0.67197	1.48964	0.459465	0.304417	0.0393645	0.00163594	1.59617	0.497387	1.49326	0.254684			1.9617	2.51845	3.2814	2.14532	5.43026	3.11709	156	6	6	7	7	6	6		1.40061	1.58696	1.81146	1.46469	2.33029	1.76553
EPI3	0.295123	1.57864	0.305958	0.047784	0.00240071	1.70649	0.949835	1.46598	0.914879	0.303964	0.0405032	0.00171867	1.61832	0.556058	1.50416	0.314748	0.301769	0.0359639	0.00133757	1.61767	0.387085	1.5565	0.150325			1.97763	1.79211	2.85804	1.46961	4.43986	1.83984	156	7	4	5	5	5	4		1.40628	1.3387	1.69057	1.21228	2.1071	1.35641
EPI5	0.295123	1.57864	0.303422	0.0445825	0.00205647	1.76263	1.09784	1.50956	1.21002	0.302231	0.0385751	0.00153856	1.67115	0.545811	1.55929	0.298284	0.301361	0.0329468	0.0011244	1.65122	0.352423	1.60031	0.124672			1.69406	2.37026	2.55853	1.39274	3.73229	1.52586	156	4	5	3	4	3	2		1.30156	1.53957	1.59954	1.18014	1.93191	1.23526
			population 9
	true	true	7							15							30
	mean	rr	mean	stdev	mse	mrr	srr	prr	mse_rr	mean	stdev	mse	mrr	srr	prr	mse_rr	mean	stdev	mse	mrr	srr	prr	mse_rr
Random	0.0796669	1.63911	0.07939	0.018525	0.000343252	2.04699	1.18655	1.90181	1.47691	0.0798546	0.013659	0.000186603	2.67225	1.83403	2.00827	3.49995	0.079637	0.0096654	9.34207e-05	2.47179	1.78233	1.93587	3.26477
NewEPI	0.0796669	1.63911	0.0792283	0.0201451	0.000406017	2.01498	1.17877	1.97619	1.50312	0.0802979	0.01584	0.000251304	2.57223	1.77353	1.9703	3.2551	0.0796064	0.0136953	0.000187565	2.57348	1.84235	2.00541	3.52843			1.18285	1.01775	1.34673	0.930042	2.00774	1.08076	169	3	6	3	7	4	7		1.08759	1.00883	1.16049	0.964387	1.41695	1.0396
Grid	0.0796669	1.63911	0.0756574	0.0211697	0.000464232	1.99751	1.32737	1.64517	1.76195	0.0757981	0.0176713	0.000327242	2.31505	1.82743	1.57787	3.34325	0.0750423	0.0142791	0.00022528	2.2448	1.81341	1.6223	3.28874			1.35245	1.19299	1.75368	0.955229	2.41145	1.00734	169	7	8	7	8	8	6		1.16295	1.09224	1.32427	0.977358	1.55288	1.00366
Peri	0.0796669	1.63911	0.0662732	0.0172526	0.000477043	1.61924	1.15632	1.30368	1.44959	0.068397	0.0142261	0.000329392	2.04131	1.51118	1.49969	2.3031	0.0710475	0.0111692	0.000199045	1.95229	1.42596	1.50194	2.05218			1.38977	0.9815	1.7652	0.65804	2.13063	0.628583	169	8	4	8	5	5	4		1.17889	0.990707	1.32861	0.811196	1.45967	0.792832
Quad	0.0796669	1.63911	0.0730071	0.0180314	0.000369484	1.52614	1.0418	1.25045	1.2364	0.07221	0.0136616	0.000242245	1.8191	1.32142	1.37129	1.81788	0.0724777	0.0105218	0.000162393	1.71087	1.18388	1.36678	1.47574			1.07642	0.837155	1.29818	0.519402	1.73829	0.452019	169	2	2	2	1	2	3		1.03751	0.914962	1.13938	0.720695	1.31844	0.672323
Square	0.0796669	1.63911	0.0751771	0.0181426	0.000349312	1.94122	1.13033	1.78173	1.29799	0.0747744	0.0129013	0.00019038	2.49863	1.71619	1.89745	3.01205	0.0749206	0.00953064	0.00011336	2.43407	1.88009	1.87784	3.59173			1.01765	0.878851	1.02024	0.860599	1.21344	1.10015	169	1	3	1	6	1	8		1.00879	0.937471	1.01007	0.927685	1.10156	1.04888
OldEPI	0.0796669	1.63911	0.071456	0.0196152	0.000452175	1.62985	1.18406	1.33196	1.49634	0.0719947	0.0156529	0.000303876	1.88907	1.48656	1.36004	2.28774	0.0721833	0.012998	0.000224952	1.84678	1.43584	1.3989	2.11934			1.31733	1.01315	1.62846	0.65365	2.40795	0.649154	169	6	5	6	4	7	5		1.14775	1.00656	1.27611	0.808487	1.55176	0.805701
EPI3	0.0796669	1.63911	0.0710683	0.0192375	0.000444017	1.57928	1.07122	1.34791	1.23231	0.0714177	0.0148827	0.000289544	1.92475	1.44206	1.40048	2.13648	0.071959	0.0121335	0.000206633	1.7828	1.12507	1.43531	1.30732			1.29356	0.834383	1.55165	0.610433	2.21186	0.400432	169	5	1	5	3	6	2		1.13735	0.913445	1.24565	0.781302	1.48723	0.632797
EPI5	0.0796669	1.63911	0.0714126	0.0186292	0.00041518	1.6677	1.20011	1.35398	1.52156	0.073115	0.0146556	0.000257714	1.90175	1.39922	1.37167	2.02934	0.0730755	0.0115243	0.000176256	1.74047	1.11248	1.40467	1.29257			1.20955	1.03023	1.38108	0.579821	1.88669	0.395916	169	4	7	4	2	3	1		1.0998	1.015	1.17519	0.76146	1.37357	0.629219
			population 10
	true	true	7							15							30
	mean	rr	mean	stdev	mse	mrr	srr	prr	mse_rr	mean	stdev	mse	mrr	srr	prr	mse_rr	mean	stdev	mse	mrr	srr	prr	mse_rr
Random	0.18249	1.55545	0.177431	0.0307806	0.000973039	1.91536	1.18158	1.60065	1.39817	0.177155	0.0224823	0.000533916	1.74019	0.603978	1.60035	0.366805	0.177479	0.0161901	0.000287229	1.6753	0.383829	1.6118	0.1505
NewEPI	0.18249	1.55545	0.176783	0.0377088	0.00145452	1.91975	1.26395	1.56895	1.59775	0.176704	0.0343622	0.00121424	1.7149	0.690917	1.56608	0.477479	0.179804	0.0301406	0.00091567	1.67685	0.562057	1.58339	0.316689			1.49483	1.14274	2.27421	1.30172	3.18794	2.10424	182	4	3	4	2	4	3		1.22263	1.06899	1.50805	1.14093	1.78548	1.4506
Grid	0.18249	1.55545	0.18293	0.0424887	0.00180548	1.96821	1.50665	1.48038	2.27563	0.181511	0.038858	0.0015109	1.91157	1.44354	1.50131	2.08674	0.181161	0.0358821	0.00128929	1.72858	0.851174	1.51585	0.726065			1.85551	1.62757	2.82985	5.68895	4.48872	4.82435	182	8	7	8	8	8	8		1.36217	1.27576	1.68222	2.38515	2.11866	2.19644
Peri	0.18249	1.55545	0.161751	0.0308473	0.00138166	1.62897	1.15129	1.264	1.41041	0.15884	0.025804	0.00122517	1.44495	0.855968	1.22559	0.841489	0.159268	0.0229496	0.00106595	1.36321	0.501913	1.24662	0.347293			1.41995	1.00875	2.29468	2.2941	3.71113	2.30759	182	3	1	6	4	6	4		1.19161	1.00437	1.51482	1.51463	1.92643	1.51908
Quad	0.18249	1.55545	0.176515	0.0325075	0.00109244	1.7322	1.22279	1.36795	1.53037	0.175476	0.0260702	0.000728851	1.58854	0.931422	1.36842	0.902527	0.175245	0.0217876	0.00052719	1.50295	0.603827	1.37916	0.395685			1.12271	1.09455	1.3651	2.46051	1.83543	2.62914	182	2	2	2	6	2	5		1.05958	1.04621	1.16838	1.5686	1.35478	1.62146
Square	0.18249	1.55545	0.178017	0.0310335	0.000983086	1.91127	1.29932	1.56571	1.68834	0.176011	0.0211083	0.000487538	1.71348	0.684236	1.56963	0.46838	0.176307	0.0163724	0.000306285	1.65461	0.388696	1.58904	0.152213			1.01033	1.20753	0.913136	1.27692	1.06634	1.01138	182	1	5	1	1	1	1		1.00515	1.09888	0.955581	1.13001	1.03264	1.00567
OldEPI	0.18249	1.55545	0.177324	0.0413855	0.00173945	1.83848	1.50367	1.37462	2.29372	0.176826	0.0377163	0.0014546	1.69458	1.07169	1.38776	1.17664	0.176818	0.0347175	0.00123748	1.58942	0.783424	1.39229	0.640374			1.78764	1.64051	2.7244	3.2078	4.30832	4.25498	182	7	8	7	7	7	7		1.33703	1.28083	1.65058	1.79103	2.07565	2.06276
EPI3	0.18249	1.55545	0.177097	0.0398435	0.00161659	1.74793	1.3178	1.36888	1.77141	0.178296	0.0347132	0.0012226	1.60812	0.854951	1.38726	0.759229	0.178168	0.0309387	0.000975883	1.57268	0.694118	1.44811	0.493322			1.66138	1.26694	2.28987	2.06984	3.39757	3.27788	182	6	6	5	3	5	6		1.28895	1.12558	1.51323	1.43869	1.84325	1.81049
EPI5	0.18249	1.55545	0.177578	0.0380739	0.00147375	1.72239	1.27052	1.36573	1.65021	0.178893	0.0327785	0.00108737	1.60604	0.927481	1.39622	0.885575	0.178596	0.0298213	0.000904473	1.51992	0.485218	1.43952	0.248876			1.51458	1.18026	2.03659	2.41429	3.14896	1.65366	182	5	4	3	5	3	2		1.23068	1.0864	1.42709	1.5538	1.77453	1.28595
			population 11
	true	true	7							15							30
	mean	rr	mean	stdev	mse	mrr	srr	prr	mse_rr	mean	stdev	mse	mrr	srr	prr	mse_rr	mean	stdev	mse	mrr	srr	prr	mse_rr
Random	0.373079	1.51711	0.379606	0.0435803	0.00194184	1.84908	1.21868	1.53659	1.48556	0.378795	0.0309149	0.000988404	1.65029	0.489773	1.53985	0.240395	0.379216	0.0209231	0.000475439	1.58972	0.337848	1.53392	0.114424
NewEPI	0.373079	1.51711	0.378032	0.0507338	0.00259845	1.76648	0.97627	1.50728	0.9532	0.377727	0.0477882	0.00230532	1.61439	0.613655	1.47254	0.378559	0.380827	0.047042	0.00227298	1.57979	0.417643	1.51159	0.174456			1.33814	0.641643	2.33236	1.57474	4.78081	1.52465	195	2	2	2	3	2	2		1.15678	0.801026	1.52721	1.25489	2.18651	1.23477
Grid	0.373079	1.51711	0.375409	0.0558758	0.00312753	1.90679	1.42654	1.48095	2.03632	0.376681	0.0512799	0.0026426	1.84476	1.39622	1.4846	1.95049	0.376378	0.0495217	0.00246328	1.7293	1.04723	1.48624	1.09764			1.6106	1.37074	2.67361	8.11369	5.18107	9.59279	195	3	7	3	8	3	8		1.26909	1.17079	1.63512	2.84845	2.2762	3.09722
Peri	0.373079	1.51711	0.425241	0.0420775	0.00449139	1.89569	1.27825	1.58506	1.63854	0.438571	0.0333925	0.00540426	1.79061	0.820977	1.60913	0.682471	0.423442	0.03045	0.00346363	1.6386	0.504652	1.52567	0.254747			2.31295	1.10298	5.46767	2.83896	7.28513	2.22634	195	4	4	4	4	4	4		1.52084	1.05023	2.3383	1.68492	2.6991	1.49209
Quad	0.373079	1.51711	0.462288	0.045784	0.0100544	1.95319	0.985852	1.70795	1.00832	0.458462	0.034144	0.00845607	1.80141	0.595687	1.66953	0.378075	0.459925	0.0304114	0.00846708	1.74889	0.418074	1.66903	0.197866			5.17777	0.67875	8.55528	1.57273	17.809	1.72923	195	5	3	5	2	5	3		2.27547	0.823863	2.92494	1.25408	4.22007	1.315
Square	0.373079	1.51711	0.379199	0.0432646	0.00190928	1.78293	0.92998	1.51266	0.864883	0.380232	0.0294917	0.000920926	1.64553	0.536558	1.52574	0.287969	0.378035	0.0222037	0.000517566	1.59794	0.325401	1.54553	0.106694			0.98323	0.582193	0.93173	1.1979	1.08861	0.932441	195	1	1	1	1	1	1		0.99158	0.763016	0.965262	1.09449	1.04336	0.96563
OldEPI	0.373079	1.51711	0.461575	0.0566365	0.0110392	2.11123	1.55353	1.68441	2.44144	0.460549	0.0531046	0.0104711	1.93868	1.09081	1.65797	1.20971	0.4607	0.0503992	0.0102175	1.87091	0.879177	1.67721	0.798584			5.68492	1.64345	10.594	5.03217	21.4907	6.97918	195	8	8	8	6	8	7		2.38431	1.28197	3.25484	2.24325	4.63581	2.64181
EPI3	0.373079	1.51711	0.46154	0.0555991	0.0109166	2.06969	1.41326	1.68725	2.02625	0.460909	0.0512335	0.010339	1.94357	1.12977	1.69087	1.30657	0.457975	0.0484718	0.00955685	1.83725	0.579262	1.70662	0.371459			5.62177	1.36396	10.4603	5.43511	20.1011	3.24634	195	7	6	7	7	7	5		2.37103	1.16789	3.23424	2.33133	4.48343	1.80176
EPI5	0.373079	1.51711	0.460892	0.056049	0.0108526	2.05402	1.31543	1.68264	1.75776	0.459112	0.0507154	0.00997373	1.90678	0.829085	1.68644	0.716055	0.453929	0.0473949	0.008783	1.84865	0.61121	1.71211	0.411603			5.58882	1.18323	10.0907	2.97866	18.4735	3.59718	195	6	5	6	5	6	6		2.36407	1.08776	3.17659	1.72588	4.29808	1.89662
			population 12
	true	true	7							15							30
	mean	rr	mean	stdev	mse	mrr	srr	prr	mse_rr	mean	stdev	mse	mrr	srr	prr	mse_rr	mean	stdev	mse	mrr	srr	prr	mse_rr
Random	0.277939	1.64331	0.272193	0.0298756	0.000925568	1.6761	0.479534	1.58097	0.233839	0.271515	0.0219146	0.000521517	1.60686	0.322806	1.55913	0.11129	0.27081	0.0147616	0.000268727	1.56985	0.211911	1.54793	0.0540036
NewEPI	0.277939	1.64331	0.272338	0.0321537	0.00106523	1.59589	0.446836	1.51356	0.216497	0.273179	0.0248238	0.000638879	1.58308	0.346371	1.53422	0.131873	0.272539	0.0211864	0.000478024	1.56359	0.245837	1.53957	0.0711978			1.1509	0.925839	1.22504	1.18495	1.77884	1.31839	208	3	1	2	4	5	6		1.0728	0.962205	1.10681	1.08856	1.33373	1.14821
Grid	0.277939	1.64331	0.28852	0.0328852	0.00119339	1.77572	0.590197	1.64649	0.348343	0.287692	0.0258471	0.000763193	1.70742	0.395919	1.64406	0.156752	0.286418	0.0215994	0.000538427	1.6819	0.285533	1.65051	0.0815809			1.28936	1.48967	1.46341	1.4085	2.00362	1.51066	208	6	6	6	8	7	8		1.1355	1.22052	1.20971	1.1868	1.41549	1.22909
Peri	0.277939	1.64331	0.299897	0.0305238	0.00141386	1.86835	0.622912	1.73831	0.397044	0.304938	0.0230889	0.00126204	1.78538	0.370766	1.73129	0.145208	0.299628	0.0189911	0.000831074	1.71463	0.25754	1.68831	0.0683519			1.52756	1.69794	2.41995	1.30477	3.09263	1.26569	208	8	7	8	6	8	4		1.23594	1.30305	1.55562	1.14227	1.75859	1.12503
Quad	0.277939	1.64331	0.288811	0.0298551	0.00100953	1.78426	0.583749	1.64863	0.340791	0.291513	0.0213862	0.000641623	1.66345	0.357213	1.60868	0.1288	0.290682	0.0175566	0.000470618	1.64768	0.244719	1.62047	0.0604091			1.09071	1.45737	1.2303	1.15734	1.75128	1.11861	208	2	4	3	2	4	2		1.04437	1.20722	1.10919	1.0758	1.32336	1.05764
Square	0.277939	1.64331	0.278367	0.0294429	0.000867067	1.70851	0.498299	1.6115	0.249314	0.27937	0.0219508	0.000483885	1.64456	0.312989	1.59991	0.0998457	0.278401	0.0145677	0.000212431	1.62311	0.210612	1.60235	0.0460351			0.936795	1.06618	0.927841	0.897167	0.790508	0.852445	208	1	2	1	1	1	1		0.967882	1.03256	0.963245	0.947189	0.889105	0.92328
OldEPI	0.277939	1.64331	0.291104	0.0335751	0.0013006	1.75866	0.651943	1.61845	0.425648	0.290366	0.0258873	0.000824583	1.672	0.393383	1.60811	0.155989	0.288662	0.0202025	0.000523124	1.6425	0.27051	1.61269	0.0741132			1.4052	1.82026	1.58112	1.40165	1.94667	1.37238	208	7	8	7	7	6	7		1.18541	1.34917	1.25743	1.18391	1.39523	1.17148
EPI3	0.277939	1.64331	0.288171	0.0314171	0.00109173	1.73836	0.587568	1.61048	0.346314	0.28781	0.024449	0.00069519	1.66386	0.3598	1.60921	0.130619	0.286608	0.0198032	0.000467318	1.66209	0.26453	1.6336	0.0700704			1.17952	1.48099	1.33301	1.17368	1.739	1.29751	208	4	5	5	3	3	5		1.08606	1.21696	1.15456	1.08337	1.31871	1.13908
EPI5	0.277939	1.64331	0.291174	0.031127	0.00114406	1.72526	0.565681	1.60574	0.321406	0.288351	0.0237078	0.000670469	1.66661	0.365129	1.61376	0.134192	0.286122	0.0193718	0.000442228	1.66466	0.257381	1.6386	0.0662672			1.23606	1.37448	1.28561	1.20579	1.64564	1.22709	208	5	3	4	5	2	3		1.11178	1.17238	1.13385	1.09808	1.28282	1.10774
			population 13
	true	true	7							15							30
	mean	rr	mean	stdev	mse	mrr	srr	prr	mse_rr	mean	stdev	mse	mrr	srr	prr	mse_rr	mean	stdev	mse	mrr	srr	prr	mse_rr
Random	0.356833	1.56346	0.354041	0.0343816	0.00118989	1.66511	0.540503	1.54434	0.292509	0.353058	0.0239683	0.00058873	1.59607	0.300769	1.55042	0.090632	0.353748	0.0172957	0.000308658	1.56999	0.209613	1.54771	0.0441857
NewEPI	0.356833	1.56346	0.354839	0.0398926	0.0015954	1.63362	0.513315	1.52076	0.265316	0.355019	0.0319416	0.00102356	1.55842	0.363494	1.49693	0.136554	0.354087	0.0272966	0.000752645	1.55157	0.286428	1.51268	0.0846196			1.34079	0.907034	1.73858	1.50669	2.43844	1.91509	221	6	4	4	3	5	3		1.15793	0.952383	1.31855	1.22747	1.56155	1.38387
Grid	0.356833	1.56346	0.35867	0.0403211	0.00162917	1.70594	0.607099	1.56708	0.368582	0.359401	0.0338283	0.00115095	1.63886	0.482742	1.53803	0.233687	0.35852	0.0294711	0.000871392	1.61855	0.355881	1.55548	0.126715			1.36917	1.26007	1.95497	2.57841	2.82316	2.86778	221	7	8	6	8	7	7		1.17012	1.12253	1.3982	1.60574	1.68023	1.69345
Peri	0.356833	1.56346	0.356213	0.0344931	0.00119016	1.52865	0.448044	1.43762	0.216579	0.359709	0.0269514	0.000734649	1.55263	0.373564	1.4772	0.146991	0.362865	0.0213368	0.000491644	1.53714	0.282545	1.48935	0.085324			1.00023	0.740419	1.24785	1.62184	1.59284	1.93103	221	1	1	2	4	2	4		1.00011	0.860476	1.11707	1.27352	1.26208	1.38962
Quad	0.356833	1.56346	0.367558	0.0337195	0.00125203	1.63571	0.494739	1.53451	0.245605	0.376028	0.0254123	0.00101423	1.59409	0.352175	1.52451	0.125544	0.37409	0.0197991	0.000689808	1.58743	0.254207	1.55005	0.064801			1.05222	0.839648	1.72275	1.38521	2.23486	1.46656	221	3	3	3	2	3	2		1.02578	0.916323	1.31253	1.17695	1.49494	1.21102
Square	0.356833	1.56346	0.35276	0.0347263	0.00122251	1.63524	0.491719	1.53307	0.242711	0.354913	0.0240334	0.000581291	1.58426	0.308318	1.53688	0.0957665	0.354738	0.0171473	0.000298419	1.5703	0.221717	1.54412	0.0495325			1.02741	0.829756	0.987364	1.05665	0.966825	1.12101	221	2	2	1	1	1	1		1.01361	0.910909	0.993662	1.02794	0.983273	1.05878
OldEPI	0.356833	1.56346	0.371664	0.0380993	0.00167152	1.59934	0.510782	1.49448	0.265656	0.374346	0.031208	0.00128064	1.62548	0.451257	1.53143	0.204659	0.373801	0.0265872	0.000994792	1.61133	0.363565	1.54689	0.132454			1.40476	0.908199	2.17527	2.25813	3.22296	2.99767	221	8	5	8	7	8	8		1.18523	0.952995	1.47488	1.50271	1.79526	1.73138
EPI3	0.356833	1.56346	0.369221	0.0375685	0.00156485	1.65536	0.536723	1.54658	0.288357	0.372369	0.0305749	0.00117619	1.65367	0.441633	1.56749	0.195056	0.369594	0.0248169	0.000778722	1.66193	0.328229	1.61349	0.110237			1.31513	0.985804	1.99785	2.15217	2.52292	2.49486	221	4	6	7	6	6	5		1.14679	0.992876	1.41345	1.46703	1.58837	1.57951
EPI5	0.356833	1.56346	0.369413	0.037802	0.00158725	1.73333	0.541851	1.61763	0.296537	0.370128	0.0297553	0.00106213	1.71201	0.428245	1.62666	0.187388	0.367738	0.0241297	0.000701161	1.71482	0.318706	1.66257	0.111396			1.33395	1.01377	1.80411	2.06757	2.27164	2.5211	221	5	7	5	5	4	6		1.15497	1.00686	1.34317	1.4379	1.5072	1.5878
			population 14
	true	true	7							15							30
	mean	rr	mean	stdev	mse	mrr	srr	prr	mse_rr	mean	stdev	mse	mrr	srr	prr	mse_rr	mean	stdev	mse	mrr	srr	prr	mse_rr
Random	0.0632151	1.84108	0.0624059	0.0187731	0.000353084	2.10879	1.52202	1.78009	2.32026	0.0633134	0.0134157	0.000179991	1.94374	0.791977	1.80678	0.628404	0.062835	0.0094682	8.97912e-05	1.83757	0.515348	1.77608	0.269809
NewEPI	0.0632151	1.84108	0.0635575	0.0237231	0.000562903	2.15146	1.61765	1.82688	2.61699	0.0635424	0.0208073	0.000433051	1.93949	1.03987	1.77605	1.08556	0.0634565	0.0174737	0.000305388	1.90478	0.838972	1.79324	0.706163			1.59425	1.12789	2.40596	1.72748	3.40109	2.61727	234	2	4	3	7	3	8		1.26263	1.06202	1.55112	1.31434	1.84421	1.6178
Grid	0.0632151	1.84108	0.0690617	0.0261841	0.00071979	2.24017	1.70622	1.8329	2.91125	0.0688238	0.0229968	0.00056031	2.06473	1.23891	1.83209	1.53498	0.0694697	0.0203843	0.00045464	1.92495	0.779599	1.81632	0.608388			2.03858	1.25471	3.113	2.44266	5.0633	2.25489	234	4	6	4	8	4	7		1.42779	1.12014	1.76437	1.5629	2.25018	1.50163
Peri	0.0632151	1.84108	0.0785024	0.0199608	0.000632135	2.91716	1.60329	2.52418	3.03716	0.0726481	0.0150191	0.000314555	2.41232	0.885857	2.2214	0.929386	0.0727821	0.0131431	0.000264268	2.27764	0.61921	2.17307	0.493638			1.79032	1.30897	1.74762	1.47896	2.94314	1.82959	234	3	7	2	6	2	5		1.33803	1.1441	1.32197	1.21613	1.71556	1.35262
Quad	0.0632151	1.84108	0.0804589	0.0217816	0.000771787	2.37823	1.6569	2.04246	2.78587	0.0815835	0.0167113	0.000616666	2.13503	0.751359	2.01647	0.595302	0.0812702	0.0140814	0.000524272	2.07823	0.576259	2.00826	0.360024			2.18584	1.20067	3.4261	0.947324	5.83879	1.33437	234	5	5	5	1	5	2		1.47846	1.09575	1.85097	0.973306	2.41636	1.15515
Square	0.0632151	1.84108	0.0673055	0.0192246	0.000386317	2.18422	1.53736	1.84109	2.36348	0.0672353	0.0131023	0.000187832	1.96476	0.801041	1.83695	0.641684	0.0675832	0.00991664	0.00011742	1.90735	0.510655	1.84316	0.260773			1.09412	1.01862	1.04357	1.02113	1.3077	0.966511	234	1	3	1	2	1	1		1.046	1.00927	1.02155	1.01051	1.14355	0.983113
OldEPI	0.0632151	1.84108	0.081078	0.0278333	0.00109378	2.29685	1.45688	1.97577	2.14064	0.0818197	0.0248047	0.000961404	2.11476	0.943351	1.97306	0.90733	0.0822271	0.0228553	0.000883821	2.04451	0.73093	1.97384	0.551884			3.09778	0.922585	5.34141	1.44386	9.84307	2.04546	234	7	2	8	5	8	6		1.76005	0.960513	2.31115	1.20161	3.13737	1.4302
EPI3	0.0632151	1.84108	0.0820761	0.0272911	0.00110054	2.18789	1.22085	1.93326	1.49897	0.0822901	0.0241258	0.00094591	2.05417	0.852139	1.94009	0.735944	0.0803664	0.0208317	0.000728127	1.96868	0.647649	1.91274	0.424584			3.11694	0.646035	5.25533	1.17113	8.10911	1.57365	234	8	1	7	3	7	3		1.76549	0.803763	2.29245	1.08219	2.84765	1.25445
EPI5	0.0632151	1.84108	0.081193	0.0272265	0.00106449	2.35141	1.79477	2.01023	3.24981	0.0804616	0.0229057	0.000822113	2.074	0.9044	1.95521	0.830965	0.078693	0.0192191	0.000608939	1.99951	0.64656	1.94462	0.42876			3.01483	1.40062	4.56753	1.32234	6.78172	1.58913	234	6	8	6	4	6	4		1.73633	1.18348	2.13718	1.14993	2.60417	1.26061
			population 15
	true	true	7							15							30
	mean	rr	mean	stdev	mse	mrr	srr	prr	mse_rr	mean	stdev	mse	mrr	srr	prr	mse_rr	mean	stdev	mse	mrr	srr	prr	mse_rr
Random	0.0971842	1.66603	0.0982607	0.020521	0.00042227	2.05831	1.52054	1.56725	2.3218	0.0974641	0.0142112	0.000202037	1.85114	0.938326	1.60697	0.883944	0.0975447	0.010399	0.000108269	1.7254	0.502859	1.62794	0.254318
NewEPI	0.0971842	1.66603	0.0991281	0.0233495	0.000548978	2.18011	1.71065	1.56674	2.93618	0.100472	0.0196993	0.000398872	2.00908	1.32238	1.65716	1.74877	0.14693	-nan	0.00247464	2.27316	0	2.27316	0.368607			1.30006	1.26461	1.97426	1.97837	22.8564	1.44939	247	6	6	7	7	8	5		1.1402	1.12455	1.40508	1.40655	4.78084	1.20391
Grid	0.0971842	1.66603	0.0992857	0.0247504	0.000616999	2.33332	1.80069	1.72416	3.24586	0.0992978	0.0201769	0.000411575	2.12478	1.58526	1.71308	2.51526	0.0993359	0.0169428	0.000291688	1.89648	0.726488	1.72285	0.531013			1.46115	1.39799	2.03713	2.8455	2.6941	2.08799	247	8	8	8	8	7	8		1.20878	1.18237	1.42728	1.68686	1.64137	1.44499
Peri	0.0971842	1.66603	0.100871	0.0206224	0.000438876	2.1454	1.58111	1.64706	2.50027	0.100997	0.0163484	0.000281807	2.02771	1.22245	1.73601	1.49928	0.0993671	0.0131349	0.000177291	1.81281	0.580747	1.69022	0.337852			1.03932	1.07687	1.39483	1.69613	1.6375	1.32846	247	3	3	3	6	3	4		1.01947	1.03772	1.18103	1.30235	1.27965	1.15259
Quad	0.0971842	1.66603	0.0974748	0.0199058	0.000396325	2.13694	1.62753	1.6355	2.64979	0.0962449	0.0148539	0.00022152	1.88548	0.995804	1.6455	0.992047	0.0981268	0.011917	0.000142903	1.7855	0.543517	1.676	0.29551			0.938558	1.14126	1.09644	1.1223	1.31989	1.16197	247	1	5	2	2	2	2		0.968792	1.0683	1.04711	1.05939	1.14886	1.07795
Square	0.0971842	1.66603	0.0971109	0.0202946	0.000411876	2.16162	1.55089	1.63277	2.40637	0.0967042	0.0137227	0.000188543	1.86969	0.974956	1.63444	0.951537	0.0980876	0.00982835	9.74125e-05	1.71341	0.525922	1.61017	0.279714			0.975385	1.03642	0.933212	1.07647	0.899726	1.09986	247	2	2	1	1	1	1		0.987616	1.01805	0.966029	1.03753	0.948539	1.04874
OldEPI	0.0971842	1.66603	0.0979827	0.0239872	0.000576023	2.21311	1.76575	1.64864	3.11818	0.0975345	0.0187139	0.000350333	1.92205	1.21648	1.61624	1.4823	0.0973848	0.0155614	0.000242197	1.80658	0.71523	1.64907	0.511842			1.36411	1.343	1.73401	1.67692	2.23699	2.0126	247	7	7	6	5	6	7		1.16795	1.15888	1.31682	1.29496	1.49566	1.41866
EPI3	0.0971842	1.66603	0.0966535	0.0228888	0.000524179	2.10957	1.60011	1.62881	2.56174	0.0969118	0.017682	0.000312727	1.893	0.996589	1.64417	0.993667	0.0991012	0.0141036	0.000202586	1.81427	0.576781	1.70141	0.333928			1.24133	1.10334	1.54788	1.12413	1.87114	1.31303	247	4	4	4	3	4	3		1.11415	1.0504	1.24414	1.06025	1.3679	1.14588
EPI5	0.0971842	1.66603	0.0970255	0.0233132	0.00054353	2.13422	1.51856	1.65045	2.30627	0.096686	0.0181011	0.000327898	1.9614	1.04879	1.6975	1.10095	0.100284	0.0142649	0.000213096	1.8791	0.604294	1.75391	0.372894			1.28716	0.99331	1.62296	1.2455	1.96821	1.46625	247	5	1	5	4	5	6		1.13453	0.99665	1.27396	1.11602	1.40293	1.21089
			population 16
	true	true	7							15							30
	mean	rr	mean	stdev	mse	mrr	srr	prr	mse_rr	mean	stdev	mse	mrr	srr	prr	mse_rr	mean	stdev	mse	mrr	srr	prr	mse_rr
Random	0.306139	1.46779	0.315825	0.0358588	0.00137967	1.4532	0.524816	1.33517	0.29302	0.31469	0.0242168	0.000659573	1.37857	0.317952	1.32576	0.121266	0.313925	0.0175675	0.000369239	1.35989	0.203819	1.33559	0.059019
NewEPI	0.306139	1.46779	0.312318	0.0474403	0.00228876	1.48837	0.65043	1.32763	0.442704	0.314059	0.0405471	0.00170679	1.41171	0.437116	1.32739	0.210783	0.303569	0.0358523	0.00129199	1.494	0.353336	1.44637	0.125305			1.65892	1.51083	2.58773	1.73818	3.49907	2.12313	260	4	6	4	8	4	8		1.28799	1.22916	1.60864	1.3184	1.87058	1.4571
Grid	0.306139	1.46779	0.311978	0.0490245	0.0024375	1.61171	0.656101	1.46852	0.430469	0.311688	0.0433881	0.00191332	1.53147	0.45417	1.45311	0.206486	0.313225	0.0396439	0.00162185	1.47369	0.347107	1.42799	0.122067			1.76672	1.46908	2.90084	1.70275	4.39242	2.06827	260	5	5	7	7	7	7		1.32918	1.21206	1.70319	1.3049	2.09581	1.43815
Peri	0.306139	1.46779	0.297249	0.0363092	0.00139739	1.46676	0.753731	1.33884	0.584739	0.29869	0.0314334	0.00104355	1.44027	0.347177	1.38202	0.127888	0.306468	0.0270804	0.000733456	1.44992	0.266395	1.41545	0.0737058			1.01284	1.99556	1.58215	1.05461	1.9864	1.24885	260	1	8	2	3	2	3		1.0064	1.41264	1.25784	1.02694	1.4094	1.11752
Quad	0.306139	1.46779	0.329168	0.0391293	0.00206144	1.48823	0.482916	1.39172	0.238995	0.327466	0.0287832	0.00128331	1.44457	0.309168	1.3985	0.100386	0.326181	0.0245979	0.00100674	1.43989	0.244787	1.40929	0.0633429			1.49415	0.815626	1.94567	0.827816	2.72652	1.07326	260	3	1	3	1	3	2		1.22235	0.90312	1.39487	0.909844	1.65122	1.03598
Square	0.306139	1.46779	0.31919	0.0353173	0.00141764	1.46712	0.505665	1.3445	0.270898	0.318533	0.023821	0.000721051	1.39704	0.329651	1.34405	0.123981	0.318871	0.0175511	0.000470145	1.37439	0.209942	1.34877	0.0582414			1.02752	0.924502	1.09321	1.02239	1.27328	0.986824	260	2	2	1	2	1	1		1.01367	0.96151	1.04557	1.01113	1.1284	0.99339
OldEPI	0.306139	1.46779	0.324595	0.0485546	0.00269817	1.58554	0.67242	1.43369	0.453311	0.325042	0.0428693	0.0021951	1.52441	0.44573	1.43676	0.199638	0.324287	0.0389688	0.00184792	1.48494	0.338665	1.43528	0.115751			1.95566	1.54703	3.32806	1.64628	5.00467	1.96125	260	8	7	8	6	8	6		1.39845	1.2438	1.8243	1.28308	2.23711	1.40045
EPI3	0.306139	1.46779	0.323092	0.0468732	0.0024845	1.58251	0.582521	1.45138	0.3396	0.3212	0.0400937	0.00183434	1.52619	0.386978	1.4627	0.149778	0.320172	0.0354476	0.00145346	1.52561	0.294708	1.49494	0.0875899			1.80079	1.15897	2.7811	1.23512	3.93636	1.4841	260	6	4	6	5	6	4		1.34194	1.07655	1.66766	1.11136	1.98403	1.21823
EPI5	0.306139	1.46779	0.323365	0.0468228	0.00248911	1.57378	0.561044	1.44889	0.315128	0.322519	0.0394539	0.00182491	1.54267	0.382535	1.4828	0.146558	0.322384	0.0334768	0.0013846	1.54799	0.29715	1.51626	0.0906475			1.80413	1.07545	2.76681	1.20857	3.74987	1.5359	260	7	3	5	4	5	5		1.34318	1.03704	1.66337	1.09935	1.93646	1.23932
			population 17
	true	true	7							15							30
	mean	rr	mean	stdev	mse	mrr	srr	prr	mse_rr	mean	stdev	mse	mrr	srr	prr	mse_rr	mean	stdev	mse	mrr	srr	prr	mse_rr
Random	0.279985	1.58016	0.275221	0.0307003	0.000965204	2.05264	1.27512	1.69478	1.63907	0.275865	0.0211735	0.000465292	1.82962	0.601445	1.69675	0.375329	0.275744	0.014613	0.000231526	1.76548	0.346211	1.71044	0.136835
NewEPI	0.279985	1.58016	0.278546	0.0364353	0.0013296	2.02589	1.34564	1.62308	1.81259	0.279776	0.0304737	0.00092869	1.81347	0.8829	1.6279	0.781792	0.285411	0.0308988	0.000984177	1.62139	0.431108	1.53182	0.188191			1.37753	1.10587	1.99593	2.08295	4.25083	1.37531	273	2	8	3	8	8	4		1.17368	1.0516	1.41277	1.44324	2.06175	1.17274
Grid	0.279985	1.58016	0.293716	0.0377768	0.00161563	2.03142	1.31194	1.6591	1.72742	0.293721	0.0300902	0.0010941	1.81578	0.723303	1.64174	0.526959	0.294096	0.0260931	0.00087997	1.7116	0.465264	1.61441	0.217644			1.67387	1.0539	2.35142	1.40399	3.80074	1.59056	273	7	7	6	7	6	8		1.29378	1.0266	1.53344	1.1849	1.94955	1.26117
Peri	0.279985	1.58016	0.299495	0.0330728	0.00147445	1.97487	1.20281	1.65436	1.45226	0.296065	0.0262786	0.000949131	1.74795	0.593202	1.60881	0.352709	0.291676	0.0221919	0.00062916	1.69242	0.409251	1.61467	0.168677			1.5276	0.886026	2.03986	0.939733	2.71745	1.23271	273	4	2	4	2	2	3		1.23596	0.94129	1.42824	0.969398	1.64847	1.11027
Quad	0.279985	1.58016	0.298647	0.0320378	0.00137469	1.8941	0.959549	1.62997	0.923215	0.2985	0.0234206	0.00089133	1.75749	0.55041	1.63659	0.306136	0.29767	0.0179235	0.000634011	1.71411	0.361261	1.65595	0.136254			1.42425	0.563256	1.91564	0.815645	2.7384	0.995752	273	3	1	2	1	3	1		1.19342	0.750504	1.38407	0.903131	1.65481	0.997874
Square	0.279985	1.58016	0.284626	0.0318557	0.00103632	2.07225	1.23755	1.73223	1.55466	0.286916	0.021085	0.000492616	1.86341	0.601031	1.73477	0.385143	0.286853	0.0148537	0.000267802	1.79093	0.340267	1.73802	0.140701			1.07368	0.948499	1.05873	1.02615	1.15668	1.02826	273	1	4	1	3	1	2		1.03619	0.973909	1.02894	1.01299	1.07549	1.01403
OldEPI	0.279985	1.58016	0.301368	0.0368651	0.00181627	2.01925	1.26387	1.66572	1.60469	0.299695	0.0282766	0.00118805	1.83111	0.664641	1.6787	0.451458	0.29935	0.0233753	0.000921408	1.74045	0.446817	1.65651	0.205475			1.88175	0.979024	2.55335	1.20283	3.97972	1.50162	273	8	5	8	6	7	7		1.37177	0.989456	1.59792	1.09674	1.99492	1.22541
EPI3	0.279985	1.58016	0.298431	0.0356388	0.00161038	2.01615	1.22483	1.6749	1.50918	0.299007	0.027113	0.00109695	1.80685	0.64435	1.65669	0.421044	0.297391	0.0230699	0.000835189	1.78224	0.421602	1.7078	0.19404			1.66843	0.920757	2.35756	1.1218	3.60733	1.41806	273	6	3	7	4	5	6		1.29168	0.959561	1.53543	1.05915	1.8993	1.19082
EPI5	0.279985	1.58016	0.298606	0.0344589	0.00153416	2.01134	1.29182	1.6519	1.67395	0.29636	0.026823	0.000987614	1.89584	0.645801	1.74476	0.444152	0.294995	0.0218614	0.000703221	1.79997	0.413941	1.72806	0.193222			1.58946	1.02128	2.12257	1.18337	3.03733	1.41208	273	5	6	5	5	4	5		1.26074	1.01058	1.4569	1.08783	1.74279	1.18831
			population 18
	true	true	7							15							30
	mean	rr	mean	stdev	mse	mrr	srr	prr	mse_rr	mean	stdev	mse	mrr	srr	prr	mse_rr	mean	stdev	mse	mrr	srr	prr	mse_rr
Random	0.114717	1.5519	0.113297	0.0245328	0.000603875	1.81841	1.29798	1.43867	1.69757	0.113557	0.0179941	0.000325133	1.62363	0.911472	1.44235	0.842782	0.113944	0.0122943	0.000151747	1.50917	0.416445	1.43085	0.18808
NewEPI	0.114717	1.5519	0.113789	0.0281547	0.000793548	1.82408	1.4737	1.38148	2.20083	0.114317	0.0241578	0.000583759	1.55682	0.797373	1.37047	0.668721	0.114429	0.020868	0.000435556	1.50487	0.565845	1.39026	0.346308			1.31409	1.29646	1.79545	0.793468	2.87027	1.84129	286	2	7	2	6	2	6		1.14634	1.13862	1.33994	0.890768	1.69419	1.35694
Grid	0.114717	1.5519	0.11611	0.030272	0.000918334	1.97617	1.68343	1.43237	2.84822	0.115389	0.0270061	0.000729781	1.76654	1.12657	1.44916	1.27972	0.116655	0.0250717	0.000632346	1.61997	0.831831	1.41355	0.711084			1.52074	1.67782	2.24456	1.51844	4.1671	3.78076	286	3	8	3	8	4	8		1.23318	1.29531	1.49819	1.23225	2.04135	1.94442
Peri	0.114717	1.5519	0.140033	0.0260717	0.00132063	1.78288	1.18422	1.45412	1.41194	0.134734	0.0202632	0.000811277	1.5497	0.68783	1.36528	0.507937	0.131641	0.0167272	0.000566221	1.42821	0.455732	1.32689	0.258321			2.18693	0.831739	2.49522	0.602691	3.73134	1.37347	286	6	3	5	2	3	3		1.47883	0.911997	1.57963	0.776332	1.93167	1.17195
Quad	0.114717	1.5519	0.135417	0.0254646	0.00107694	1.72823	1.04734	1.42818	1.11223	0.134478	0.0189649	0.000750164	1.52766	0.615607	1.38368	0.40727	0.136421	0.0154294	0.00070913	1.42037	0.379684	1.35049	0.184726			1.78338	0.655187	2.30725	0.483244	4.6731	0.982169	286	4	1	4	1	5	2		1.33543	0.809436	1.51896	0.695158	2.16173	0.991044
Square	0.114717	1.5519	0.113538	0.0257157	0.000662687	1.85276	1.22596	1.47276	1.50924	0.113857	0.0175327	0.000308135	1.68019	0.736639	1.49132	0.546307	0.114821	0.0128879	0.000166109	1.54334	0.414986	1.46696	0.179428			1.09739	0.889058	0.94772	0.648218	1.09464	0.954002	286	1	4	1	4	1	1		1.04756	0.942899	0.973509	0.80512	1.04625	0.97673
OldEPI	0.114717	1.5519	0.134609	0.031064	0.00136066	1.72856	1.31945	1.35221	1.78082	0.134077	0.0273392	0.00112224	1.58011	0.866619	1.34691	0.793049	0.13511	0.0250696	0.00104436	1.47123	0.622296	1.31327	0.444197			2.25322	1.04904	3.45164	0.940989	6.88223	2.36175	286	7	5	8	7	8	7		1.50107	1.02423	1.85786	0.970046	2.6234	1.5368
EPI3	0.114717	1.5519	0.136149	0.0306084	0.0013962	1.56418	1.10317	1.25333	1.30613	0.134836	0.0255901	0.00105963	1.49948	0.738439	1.31106	0.603296	0.132029	0.0224809	0.000805096	1.53343	0.517963	1.43391	0.282207			2.31208	0.769409	3.25906	0.715838	5.30551	1.50047	286	8	2	7	5	7	5		1.52055	0.87716	1.80529	0.846072	2.30337	1.22494
EPI5	0.114717	1.5519	0.132719	0.0312984	0.00130366	1.81873	1.42581	1.42842	2.04818	0.132862	0.0261758	0.00101441	1.65124	0.732433	1.46806	0.543487	0.131024	0.0224617	0.000770446	1.60777	0.523675	1.52046	0.275224			2.15883	1.20654	3.11999	0.644873	5.07717	1.46334	286	5	6	6	3	6	4		1.4693	1.09842	1.76635	0.80304	2.25326	1.20969
			population 19
	true	true	7							15							30
	mean	rr	mean	stdev	mse	mrr	srr	prr	mse_rr	mean	stdev	mse	mrr	srr	prr	mse_rr	mean	stdev	mse	mrr	srr	prr	mse_rr
Random	0.342626	1.6776	0.342962	0.0334965	0.00112213	1.74449	0.539857	1.61739	0.295071	0.34332	0.0225702	0.000509895	1.63591	0.327621	1.58258	0.116364	0.343455	0.0162409	0.000264454	1.63403	0.224399	1.60818	0.055174
NewEPI	0.342626	1.6776	0.341251	0.0370534	0.00137484	1.66157	0.532473	1.5448	0.301163	0.340969	0.030552	0.00093617	1.66674	0.388876	1.59541	0.15798	0.342747	0.0270581	0.000732155	1.6266	0.286957	1.59135	0.0897834			1.22521	1.02065	1.836	1.35763	2.76855	1.62728	299	7	1	7	5	7	5		1.10689	1.01027	1.35499	1.16517	1.6639	1.27565
Grid	0.342626	1.6776	0.33891	0.0369249	0.00137726	1.7709	0.654135	1.62646	0.430508	0.338119	0.0319716	0.0010425	1.69316	0.429506	1.61813	0.188012	0.339096	0.0282968	0.00081317	1.63113	0.307232	1.58987	0.102088			1.22736	1.459	2.04453	1.61572	3.0749	1.85029	299	8	8	8	8	8	8		1.10786	1.20789	1.42987	1.27111	1.75354	1.36025
Peri	0.342626	1.6776	0.352296	0.033483	0.00121462	1.80018	0.60744	1.66364	0.369178	0.34918	0.0279652	0.000825007	1.71118	0.354747	1.65277	0.126462	0.345451	0.0232089	0.000546634	1.67202	0.270318	1.63808	0.0746337			1.08243	1.25115	1.61799	1.08678	2.06703	1.35269	299	3	5	5	1	3	4		1.0404	1.11855	1.272	1.04249	1.43772	1.16305
Quad	0.342626	1.6776	0.338571	0.0329543	0.00110243	1.70927	0.569616	1.58238	0.333529	0.337589	0.0235986	0.000582265	1.62234	0.363365	1.56244	0.145296	0.338997	0.0186821	0.00036219	1.59751	0.244957	1.56588	0.0724853			0.982445	1.13034	1.14193	1.24863	1.36958	1.31376	299	2	3	2	3	2	2		0.991183	1.06317	1.06861	1.11742	1.17029	1.14619
Square	0.342626	1.6776	0.334954	0.0315573	0.00105472	1.74747	0.645814	1.59815	0.423388	0.337094	0.0229639	0.000557944	1.64492	0.360711	1.58604	0.138496	0.336762	0.0160193	0.000291004	1.62338	0.231008	1.59646	0.0599484			0.93993	1.43487	1.09423	1.19019	1.1004	1.08653	299	1	7	1	2	1	1		0.9695	1.19786	1.04606	1.09096	1.049	1.04237
OldEPI	0.342626	1.6776	0.338627	0.0361703	0.00132428	1.68633	0.60587	1.5485	0.383745	0.338208	0.0289046	0.000854995	1.61261	0.38843	1.54499	0.168463	0.337587	0.0242289	0.000612431	1.58678	0.288777	1.54815	0.100149			1.18015	1.30052	1.6768	1.44772	2.31583	1.81516	299	6	6	6	6	6	7		1.08635	1.1404	1.29491	1.20321	1.52179	1.34728
EPI3	0.342626	1.6776	0.338725	0.0356641	0.00128715	1.66245	0.559483	1.54321	0.331082	0.338216	0.027736	0.000788734	1.62176	0.41131	1.55087	0.185236	0.336833	0.0229441	0.00055999	1.59131	0.280834	1.5559	0.0936786			1.14706	1.12204	1.54685	1.59187	2.11753	1.69787	299	4	2	3	7	4	6		1.07101	1.05926	1.24373	1.26169	1.45518	1.30303
EPI5	0.342626	1.6776	0.33631	0.0356214	0.00130878	1.67967	0.584162	1.55366	0.356606	0.336078	0.0273866	0.000792902	1.62615	0.378286	1.56461	0.155867	0.336409	0.0234377	0.000587977	1.6036	0.251396	1.5749	0.0737472			1.16633	1.20854	1.55503	1.33947	2.22336	1.33663	299	5	4	4	4	5	3		1.07997	1.09934	1.24701	1.15736	1.49109	1.15613
			population 20
	true	true	7							15							30
	mean	rr	mean	stdev	mse	mrr	srr	prr	mse_rr	mean	stdev	mse	mrr	srr	prr	mse_rr	mean	stdev	mse	mrr	srr	prr	mse_rr
Random	0.418805	1.73686	0.413822	0.037896	0.00146094	1.87029	0.460742	1.78453	0.214556	0.41223	0.0278407	0.000818335	1.83779	0.320042	1.79512	0.105821	0.413951	0.0196567	0.000409947	1.80885	0.206487	1.78971	0.04543
NewEPI	0.418805	1.73686	0.414347	0.0467872	0.00220892	1.86868	0.532345	1.76525	0.284197	0.411823	0.0404723	0.00168676	1.82808	0.389597	1.76852	0.152788	0.414204	0.0375061	0.00142788	1.80094	0.316106	1.76048	0.100481			1.51199	1.32459	2.0612	1.44383	3.48308	2.21177	312	7	7	5	6	4	5		1.22963	1.15091	1.43569	1.2016	1.8663	1.4872
Grid	0.418805	1.73686	0.399414	0.0488479	0.00276213	1.70644	0.521309	1.60582	0.288935	0.396568	0.0433028	0.00236962	1.67875	0.388372	1.61744	0.165094	0.394755	0.0401378	0.00218945	1.67945	0.33658	1.63074	0.124548			1.89066	1.34667	2.89566	1.56012	5.3408	2.74153	312	8	8	8	7	8	7		1.37501	1.16046	1.70166	1.24905	2.31102	1.65576
Peri	0.418805	1.73686	0.408136	0.0399891	0.00171296	1.60217	0.39247	1.53523	0.194687	0.405201	0.0339109	0.00133502	1.53315	0.26201	1.49855	0.125441	0.401301	0.0292785	0.00116362	1.53593	0.208557	1.51404	0.0931448			1.1725	0.907398	1.63138	1.18541	2.83847	2.05029	312	2	2	2	2	3	3		1.08282	0.952574	1.27726	1.08876	1.68477	1.43188
Quad	0.418805	1.73686	0.41257	0.0374368	0.00144039	1.57844	0.370918	1.51235	0.187985	0.410755	0.0286791	0.000887293	1.522	0.258583	1.48886	0.128369	0.409775	0.023785	0.000647267	1.51235	0.201973	1.49129	0.101098			0.985935	0.876159	1.08427	1.21308	1.5789	2.22535	312	1	1	1	3	1	6		0.992943	0.936034	1.04128	1.1014	1.25654	1.49176
Square	0.418805	1.73686	0.394418	0.0386767	0.00209061	1.81174	0.474098	1.72556	0.224897	0.3926	0.0270286	0.00141725	1.75174	0.28557	1.7162	0.0819771	0.393278	0.0192302	0.00102143	1.73943	0.198068	1.72217	0.0394467			1.43101	1.0482	1.73187	0.774676	2.49161	0.868297	312	3	5	3	1	2	1		1.19625	1.02382	1.316	0.880157	1.57848	0.931824
OldEPI	0.418805	1.73686	0.411544	0.0454099	0.00211478	1.53859	0.401757	1.4639	0.235916	0.410941	0.0394369	0.00161711	1.52152	0.31118	1.4754	0.165194	0.407374	0.0364389	0.00145846	1.53214	0.270926	1.49716	0.130857			1.44755	1.09956	1.9761	1.56107	3.55768	2.88041	312	4	6	4	8	5	8		1.20314	1.0486	1.40574	1.24943	1.88618	1.69718
EPI3	0.418805	1.73686	0.409966	0.0454813	0.00214668	1.57705	0.409346	1.50461	0.221504	0.404619	0.0389031	0.00171469	1.57411	0.314622	1.53009	0.141741	0.399032	0.0353522	0.00164075	1.6121	0.270107	1.57939	0.0977546			1.46938	1.03239	2.09534	1.33944	4.00234	2.15176	312	5	4	6	5	7	4		1.21218	1.01606	1.44753	1.15734	2.00059	1.46689
EPI5	0.418805	1.73686	0.405295	0.04458	0.0021699	1.57977	0.392374	1.50723	0.206687	0.399775	0.0380328	0.00180863	1.59584	0.315842	1.54855	0.135217	0.395975	0.0329711	0.0016083	1.62929	0.259891	1.59893	0.086568			1.48528	0.963327	2.21014	1.27779	3.92319	1.90553	312	6	3	7	4	6	2		1.21872	0.981492	1.48665	1.13039	1.98071	1.38041
			population 21
	true	true	7							15							30
	mean	rr	mean	stdev	mse	mrr	srr	prr	mse_rr	mean	stdev	mse	mrr	srr	prr	mse_rr	mean	stdev	mse	mrr	srr	prr	mse_rr
Random	0.131295	1.58376	0.126072	0.0250439	0.000654477	1.79933	0.961832	1.60931	0.925774	0.126564	0.0165668	0.000296841	1.71405	0.495409	1.63773	0.248343	0.126259	0.0124514	0.000180398	1.66032	0.300675	1.62754	0.0923221
NewEPI	0.131295	1.58376	0.132073	0.0316737	0.00100383	1.76722	0.820516	1.59037	0.67329	0.134781	0.0279503	0.000793371	1.69465	0.621684	1.5843	0.386491	0.130062	0.0270467	0.000733044	1.6643	0.534452	1.59334	0.285731			1.53379	0.727273	2.67271	1.55628	4.06347	3.09493	325	2	6	2	8	3	8		1.23846	0.852803	1.63484	1.24751	2.01581	1.75924
Grid	0.131295	1.58376	0.142763	0.0352771	0.00137599	1.86096	1.0246	1.66595	1.05656	0.141681	0.0311691	0.00107938	1.71032	0.578112	1.62298	0.335752	0.140174	0.0283226	0.000881006	1.66858	0.449441	1.62054	0.20335			2.10243	1.14127	3.63623	1.35197	4.88367	2.20261	325	3	8	4	7	5	7		1.44997	1.0683	1.90689	1.16274	2.2099	1.48412
Peri	0.131295	1.58376	0.159277	0.0282574	0.00158147	1.5384	0.577744	1.42951	0.357581	0.159697	0.0239059	0.00137817	1.64457	0.426724	1.58126	0.1821	0.159585	0.0196745	0.00118741	1.61843	0.318209	1.58555	0.10126			2.41639	0.386251	4.64277	0.733259	6.58215	1.09681	325	4	2	6	2	6	3		1.55448	0.621491	2.15471	0.856305	2.56557	1.04729
Quad	0.131295	1.58376	0.165718	0.0278093	0.0019583	1.56679	0.572041	1.46304	0.341804	0.165292	0.0213055	0.00160972	1.54085	0.408721	1.48265	0.177276	0.162729	0.0171732	0.00128301	1.59946	0.296834	1.56925	0.088321			2.99216	0.369209	5.42283	0.713836	7.11212	0.956661	325	6	1	7	1	7	1		1.72979	0.607626	2.3287	0.844888	2.66686	0.97809
Square	0.131295	1.58376	0.130967	0.02509	0.000629616	1.79738	0.761817	1.6406	0.583596	0.13037	0.0171029	0.000293365	1.68685	0.443631	1.62509	0.198517	0.129951	0.0120435	0.000146852	1.67384	0.313062	1.63959	0.101125			0.962014	0.630387	0.988289	0.799365	0.814043	1.09535	325	1	5	1	3	1	2		0.980823	0.793969	0.994127	0.894072	0.902243	1.04659
OldEPI	0.131295	1.58376	0.164986	0.0351399	0.0023699	1.72256	0.758952	1.5683	0.576247	0.164305	0.0313812	0.00207444	1.63678	0.537582	1.55768	0.289675	0.15766	0.0283067	0.00149638	1.65984	0.435093	1.61664	0.190387			3.62106	0.622449	6.98838	1.16643	8.29487	2.0622	325	8	4	8	5	8	5		1.90291	0.788955	2.64356	1.08001	2.88008	1.43604
EPI3	0.131295	1.58376	0.162843	0.035254	0.00223812	1.66673	0.688039	1.53888	0.475412	0.153634	0.0290626	0.00134367	1.70666	0.523029	1.63801	0.276502	0.144652	0.023647	0.00073759	1.78836	0.40905	1.75054	0.195137			3.41971	0.513529	4.52655	1.11339	4.08867	2.11366	325	7	3	5	4	4	6		1.84925	0.71661	2.12757	1.05517	2.02205	1.45384
EPI5	0.131295	1.58376	0.154308	0.0337783	0.00167057	1.87569	0.874431	1.70373	0.779022	0.146452	0.0270713	0.00096259	1.81163	0.530095	1.74123	0.305798	0.138561	0.0208284	0.000486617	1.72487	0.416163	1.67588	0.181678			2.55253	0.841483	3.24278	1.23135	2.69746	1.96787	325	5	7	3	6	2	4		1.59766	0.917324	1.80077	1.10966	1.64239	1.40281
			population 22
	true	true	7							15							30
	mean	rr	mean	stdev	mse	mrr	srr	prr	mse_rr	mean	stdev	mse	mrr	srr	prr	mse_rr	mean	stdev	mse	mrr	srr	prr	mse_rr
Random	0.0699255	2.71591	0.0715666	0.0191491	0.000369381	3.77215	3.01525	2.82615	9.10389	0.0713102	0.0137048	0.000189739	3.31743	1.94623	2.86748	3.81078	0.0710451	0.00958638	9.31521e-05	3.02626	0.946669	2.84464	0.912754
NewEPI	0.0699255	2.71591	0.0734698	0.0247632	0.000625778	3.704	3.22772	2.7498	10.4193	0.073536	0.0226607	0.000526543	3.30323	2.63064	2.70212	6.92046	0.0725325	0.0205404	0.000428704	3.10492	1.74187	2.76184	3.03622			1.69413	1.14449	2.77509	1.81602	4.6022	3.32644	338	5	6	6	7	7	7		1.30159	1.06981	1.66586	1.3476	2.14527	1.82385
Grid	0.0699255	2.71591	0.0712958	0.0263706	0.000697286	3.63379	3.34844	2.56528	11.2347	0.0716763	0.0239749	0.000577861	3.45277	3.34119	2.5903	11.1793	0.0717416	0.0220649	0.000490158	3.14539	2.00703	2.64418	4.03331			1.88771	1.23406	3.04556	2.9336	5.26191	4.41884	338	8	8	8	8	8	8		1.37394	1.11088	1.74515	1.71278	2.29389	2.1021
Peri	0.0699255	2.71591	0.0694237	0.0210861	0.000444875	3.30093	2.78482	2.45058	7.82562	0.0682576	0.0179	0.000323192	2.91495	2.12413	2.37911	4.62536	0.067943	0.015834	0.000254646	2.45344	1.11973	2.20753	1.51225			1.20438	0.859591	1.70335	1.21376	2.73366	1.65679	338	3	5	3	6	3	4		1.09744	0.927142	1.30512	1.10171	1.65338	1.28717
Quad	0.0699255	2.71591	0.0712589	0.0194099	0.000378522	2.55398	1.87401	2.0133	4.00557	0.0712039	0.0154852	0.000241426	2.23329	1.22196	1.96767	2.05305	0.0717217	0.0127084	0.00016473	2.07568	0.690785	1.94297	1.07462			1.02475	0.439985	1.27241	0.538747	1.76839	1.17734	338	2	1	2	1	2	2		1.0123	0.663314	1.12801	0.733994	1.32981	1.08505
Square	0.0699255	2.71591	0.0701103	0.0192932	0.000372262	3.96425	3.24514	2.99039	10.6063	0.0705893	0.0139494	0.000195026	3.44314	1.99354	2.98885	4.0487	0.069799	0.0100792	0.000101606	3.12366	0.954905	2.94718	0.965329			1.0078	1.16503	1.02787	1.06243	1.09076	1.0576	338	1	7	1	5	1	1		1.00389	1.07936	1.01384	1.03074	1.04439	1.0284
OldEPI	0.0699255	2.71591	0.0723868	0.0262717	0.00069626	2.62639	2.4473	1.95975	6.56106	0.0723293	0.0232432	0.000546025	2.37572	1.64931	1.96761	3.28018	0.0713984	0.0206432	0.000428311	2.25887	1.19329	2.00552	1.92859			1.88494	0.720687	2.87777	0.860761	4.59798	2.11294	338	7	4	7	3	6	6		1.37293	0.848933	1.6964	0.927772	2.14429	1.4536
EPI3	0.0699255	2.71591	0.0709117	0.0258617	0.0006698	2.61672	2.29101	1.97186	5.80234	0.0697849	0.0214738	0.000461144	2.46873	1.60794	2.06929	3.00359	0.0693208	0.0183458	0.000336934	2.32639	1.11572	2.08982	1.63682			1.8133	0.637347	2.43041	0.788181	3.61703	1.79328	338	6	3	5	2	5	5		1.34659	0.79834	1.55898	0.887796	1.90185	1.33913
EPI5	0.0699255	2.71591	0.0708546	0.0249564	0.000623685	2.72184	2.24411	2.0597	5.46664	0.0695839	0.0203638	0.000414801	2.53361	1.7295	2.10338	3.36636	0.069816	0.0173238	0.000300126	2.34756	1.068	2.13793	1.47468			1.68846	0.600473	2.18617	0.883378	3.22189	1.61564	338	4	2	4	4	4	3		1.29941	0.774902	1.47857	0.939882	1.79496	1.27108
			population 23
	true	true	7							15							30
	mean	rr	mean	stdev	mse	mrr	srr	prr	mse_rr	mean	stdev	mse	mrr	srr	prr	mse_rr	mean	stdev	mse	mrr	srr	prr	mse_rr
Random	0.339863	1.41688	0.336619	0.0410352	0.00169441	1.43917	0.412169	1.35713	0.173453	0.338169	0.0285468	0.000817789	1.38391	0.253614	1.34864	0.0689768	0.338401	0.0209698	0.00044187	1.36486	0.189931	1.34523	0.0412075
NewEPI	0.339863	1.41688	0.340834	0.0507041	0.00257185	1.38269	0.483011	1.29144	0.249035	0.339192	0.0448358	0.0020107	1.36423	0.376171	1.30738	0.153495	0.340937	0.0443095	0.00196449	1.32743	0.291209	1.29313	0.100117			1.51784	1.43575	2.4587	2.22531	4.44585	2.42958	351	2	2	2	3	2	3		1.23201	1.19823	1.56802	1.49175	2.10852	1.55871
Grid	0.339863	1.41688	0.346552	0.0565352	0.00324097	1.53475	0.735504	1.37622	0.542619	0.345664	0.0517079	0.00270736	1.46529	0.500716	1.37399	0.252556	0.344567	0.0489907	0.00242222	1.44984	0.407992	1.38579	0.167424			1.91274	3.12833	3.31058	3.66147	5.48174	4.06295	351	3	7	3	8	4	7		1.38302	1.76871	1.8195	1.9135	2.34131	2.01568
Peri	0.339863	1.41688	0.383853	0.0416241	0.00366769	1.58798	0.511255	1.47673	0.264964	0.381841	0.0356697	0.00303448	1.57746	0.43329	1.49779	0.194287	0.373717	0.0320011	0.00217016	1.48098	0.324099	1.43383	0.105327			2.16458	1.52758	3.71059	2.8167	4.91132	2.55603	351	4	4	4	4	3	4		1.47125	1.23595	1.92629	1.6783	2.21615	1.59876
Quad	0.339863	1.41688	0.386409	0.0413237	0.00387418	1.49289	0.501074	1.39175	0.251707	0.385861	0.0329089	0.00319881	1.43002	0.309239	1.39008	0.096347	0.384828	0.0277803	0.0027936	1.43855	0.260111	1.40912	0.0677179			2.28645	1.45115	3.91154	1.3968	6.32221	1.64334	351	5	3	5	2	5	2		1.5121	1.20464	1.97776	1.18186	2.5144	1.28193
Square	0.339863	1.41688	0.339397	0.0406901	0.0016559	1.46509	0.436895	1.37804	0.192386	0.340753	0.0289323	0.00083787	1.39509	0.284225	1.35464	0.0846577	0.339562	0.0214743	0.000461236	1.37312	0.186368	1.35404	0.0386819			0.977272	1.10915	1.02455	1.22734	1.04383	0.93871	351	1	1	1	1	1	1		0.988571	1.05316	1.0122	1.10785	1.02168	0.96887
OldEPI	0.339863	1.41688	0.387322	0.0537191	0.0051381	1.58931	0.642098	1.43175	0.412511	0.386042	0.0487958	0.00451353	1.51968	0.476067	1.42376	0.226687	0.384461	0.0459912	0.00410417	1.50801	0.415378	1.4374	0.17296			3.03238	2.37822	5.51918	3.28643	9.28819	4.19729	351	8	6	8	6	8	8		1.74137	1.54215	2.34929	1.81285	3.04765	2.04873
EPI3	0.339863	1.41688	0.385578	0.0516157	0.00475404	1.61438	0.822463	1.43727	0.676861	0.383287	0.0474271	0.00413497	1.54493	0.485413	1.45757	0.237281	0.380052	0.0451797	0.00365636	1.53587	0.387098	1.48474	0.15445			2.80572	3.90227	5.05628	3.44002	8.27475	3.7481	351	7	8	7	7	7	6		1.67503	1.97542	2.24862	1.85473	2.87659	1.936
EPI5	0.339863	1.41688	0.383004	0.0504159	0.00440291	1.58151	0.584504	1.45499	0.343097	0.38011	0.0454883	0.00368901	1.53811	0.439628	1.4716	0.196267	0.37687	0.0433205	0.00324618	1.52687	0.34274	1.4914	0.123024			2.59849	1.97804	4.51095	2.84541	7.34647	2.98547	351	6	5	6	5	6	5		1.61198	1.40643	2.1239	1.68683	2.71044	1.72785
			population 24
	true	true	7							15							30
	mean	rr	mean	stdev	mse	mrr	srr	prr	mse_rr	mean	stdev	mse	mrr	srr	prr	mse_rr	mean	stdev	mse	mrr	srr	prr	mse_rr
Random	0.0365073	1.6253	0.0392542	0.0140747	0.000205643	1.82877	1.60594	1.4053	2.62744	0.039363	0.00959084	0.000100139	1.5441	0.811255	1.37171	0.722443	0.0389203	0.00679407	5.19818e-05	1.49066	0.525393	1.40119	0.326263
NewEPI	0.0365073	1.6253	0.036438	0.0166231	0.000276332	-nan	-nan	1.61398	0.000128142	0.0368724	0.0140223	0.000196758	2.01735	1.54235	1.54729	2.38493	-nan	0		-nan	-nan	-nan				1.34375	4.87708e-05	1.96484	3.3012	0	0	364	3	1	3	7	1	1		1.1592	0.00698361	1.40173	1.81692	0	0
Grid	0.0365073	1.6253	0.0383032	0.0175933	0.000312749	-nan	-nan	1.5621	0.00399424	0.0386859	0.0148391	0.000224945	1.89087	1.58416	1.51154	2.5225	0.0383913	0.0128205	0.000167915	1.76293	1.00457	1.52962	1.01832			1.52084	0.0015202	2.24632	3.49163	3.23026	3.12115	364	4	2	4	8	4	8		1.23322	0.0389897	1.49877	1.86859	1.79729	1.76668
Peri	0.0365073	1.6253	0.0318176	0.0134509	0.00020292	-nan	-nan	1.00533	0.384363	0.0378912	0.0112544	0.000128577	1.86838	1.19593	1.5527	1.43552	0.0382315	0.00942584	9.18192e-05	1.53559	0.711143	1.38252	0.564666			0.986761	0.146288	1.28398	1.98704	1.76637	1.73071	364	1	4	2	4	3	4		0.993358	0.382476	1.13313	1.40962	1.32905	1.31556
Quad	0.0365073	1.6253	0.0524395	0.0163752	0.000521982	1.71594	1.5093	1.34175	2.35839	0.0517824	0.0123376	0.000385545	1.55998	0.787513	1.40018	0.670856	0.05189	0.0100381	0.000337391	1.47959	0.496442	1.39534	0.299336			2.5383	0.897598	3.85009	0.928594	6.49056	0.917469	364	5	5	5	1	5	2		1.5932	0.947416	1.96216	0.963636	2.54766	0.957846
Square	0.0365073	1.6253	0.0398775	0.0143349	0.000216848	-nan	-nan	1.44483	0.0325694	0.0395961	0.00936793	9.72987e-05	1.64372	0.959407	1.42784	0.959452	0.0401897	0.00677933	5.95193e-05	1.54	0.539809	1.45688	0.319759			1.05449	0.0123959	0.971634	1.32807	1.145	0.980065	364	2	3	1	2	2	3		1.02688	0.111337	0.985715	1.15242	1.07005	0.989982
OldEPI	0.0365073	1.6253	0.0518829	0.0196229	0.000621467	1.88711	1.87374	1.40027	3.56154	0.0512753	0.0164124	0.000487461	1.63167	1.09884	1.35987	1.2779	0.0506404	0.0148577	0.000420496	1.54306	0.728813	1.37962	0.591527			3.02208	1.35552	4.86783	1.76886	8.08929	1.81304	364	8	8	8	3	8	5		1.73841	1.16427	2.20632	1.32999	2.84417	1.34649
EPI3	0.0365073	1.6253	0.0513885	0.0191277	0.000587319	1.84408	1.74809	1.37725	3.11735	0.050702	0.0160964	0.000460583	1.65491	1.27853	1.37922	1.69519	0.0497287	0.0140886	0.000373294	1.56239	0.837457	1.40317	0.750676			2.85602	1.18646	4.59943	2.34648	7.18124	2.30083	364	7	7	7	6	6	7		1.68998	1.08925	2.14463	1.53182	2.67978	1.51685
EPI5	0.0365073	1.6253	0.0503152	0.019121	0.000556271	1.79778	1.61677	1.34808	2.6908	0.0503335	0.0159505	0.000445582	1.66584	1.17975	1.39323	1.44567	0.0497206	0.0144894	0.000384534	1.57693	0.799432	1.41483	0.683389			2.70504	1.02411	4.44963	2.00108	7.39747	2.0946	364	6	6	6	5	7	6		1.6447	1.01198	2.10941	1.4146	2.71983	1.44727
			population 25
	true	true	7							15							30
	mean	rr	mean	stdev	mse	mrr	srr	prr	mse_rr	mean	stdev	mse	mrr	srr	prr	mse_rr	mean	stdev	mse	mrr	srr	prr	mse_rr
Random	0.0598971	1.74718	0.0595728	0.0178262	0.000317879	2.35916	1.82731	1.76063	3.33924	0.0584144	0.0123692	0.000155195	2.13239	1.42878	1.76323	2.04167	0.058847	0.00876419	7.79137e-05	1.8712	0.621084	1.74096	0.385784
NewEPI	0.0598971	1.74718	0.0591987	0.0235785	0.000556433	2.08882	1.70196	1.62908	2.91062	0.0588401	0.0201604	0.000407559	2.23292	1.92239	1.66313	3.70265	0.0591228	0.0181776	0.000331025	1.97918	1.32274	1.65053	1.75898			1.75046	0.871639	2.6261	1.81354	4.24861	4.5595	377	3	1	2	5	2	5		1.32305	0.933616	1.62053	1.34668	2.06121	2.1353
Grid	0.0598971	1.74718	0.0591301	0.0247239	0.000611859	2.10923	1.7601	1.60048	3.11947	0.0587155	0.0208486	0.00043606	2.11852	1.9005	1.58027	3.63976	0.0580694	0.0187279	0.000354075	1.8637	1.12147	1.58428	1.28423			1.92482	0.934186	2.80975	1.78274	4.54445	3.32889	377	4	3	3	4	3	3		1.38738	0.966533	1.67623	1.33519	2.13177	1.82452
Peri	0.0598971	1.74718	0.066059	0.0212832	0.000490944	2.4924	1.7426	1.93751	3.07288	0.0749306	0.0174148	0.000529281	2.81953	2.02701	2.19172	4.30639	0.0750116	0.0150361	0.000454532	2.38118	1.21041	2.08067	1.57631			1.54444	0.920233	3.41042	2.10925	5.83379	4.08599	377	2	2	4	6	4	4		1.24275	0.959288	1.84673	1.45232	2.41532	2.02138
Quad	0.0598971	1.74718	0.0764703	0.0226684	0.000788527	2.55291	1.79211	1.99021	3.27072	0.0754281	0.0172065	0.000537275	2.41847	1.75673	1.92655	3.11827	0.0747347	0.0154632	0.000459265	2.1698	0.926562	1.95019	0.89973			2.48059	0.97948	3.46193	1.52732	5.89453	2.33221	377	5	4	5	2	5	2		1.57499	0.989687	1.86063	1.23585	2.42787	1.52716
Square	0.0598971	1.74718	0.057382	0.017262	0.000304302	2.27377	1.87291	1.70127	3.5099	0.0579492	0.0120159	0.000148176	2.00326	1.1775	1.70968	1.38791	0.0569849	0.0090421	9.02404e-05	1.87063	0.690379	1.73544	0.476761			0.957291	1.05111	0.954771	0.679793	1.15821	1.23582	377	1	5	1	1	1	1		0.978413	1.02523	0.977124	0.824495	1.0762	1.11168
OldEPI	0.0598971	1.74718	0.0757535	0.0301918	0.00116297	2.55213	2.24206	1.88712	5.04642	0.0754905	0.0278043	0.00101623	2.5508	2.24181	1.91476	5.0538	0.074325	0.0258153	0.000874594	2.3401	1.62386	1.94744	2.67703			3.65854	1.51125	6.54809	2.47532	11.2252	6.93918	377	8	6	8	8	8	8		1.91273	1.22933	2.55892	1.57332	3.3504	2.63423
EPI3	0.0598971	1.74718	0.0749525	0.0296658	0.00110672	2.70461	2.3599	2.00502	5.63561	0.0733756	0.0264946	0.000883634	2.61439	2.21201	2.0646	4.99374	0.0722063	0.0243894	0.000746359	2.35744	1.43613	2.07594	2.17055			3.4816	1.68769	5.69368	2.44591	9.57931	5.62634	377	7	7	7	7	7	7		1.8659	1.29911	2.38614	1.56394	3.09505	2.37199
EPI5	0.0598971	1.74718	0.0740043	0.0298913	0.0010925	2.67109	2.37184	1.99325	5.68618	0.0729856	0.026287	0.000862315	2.50906	1.86317	2.01981	3.54573	0.0702614	0.0220949	0.000595603	2.239	1.36926	1.98001	1.92908			3.43686	1.70283	5.55632	1.73668	7.6444	5.00042	377	6	8	6	3	6	6		1.85388	1.30493	2.35718	1.31783	2.76485	2.23616
			population 26
	true	true	7							15							30
	mean	rr	mean	stdev	mse	mrr	srr	prr	mse_rr	mean	stdev	mse	mrr	srr	prr	mse_rr	mean	stdev	mse	mrr	srr	prr	mse_rr
Random	0.172678	1.5162	0.173823	0.0255996	0.000656651	1.72498	0.749108	1.53947	0.561704	0.174831	0.0183993	0.00034317	1.63712	0.413678	1.56244	0.173268	0.175292	0.012785	0.000170289	1.56475	0.28107	1.52943	0.0791754
NewEPI	0.172678	1.5162	0.174802	0.0287592	0.000831603	1.8167	0.921539	1.58777	0.854356	0.175371	0.0222634	0.000502911	1.6493	0.472047	1.55368	0.224233	0.174121	0.0186674	0.000350554	1.63804	0.374342	1.57565	0.143666			1.26643	1.52101	1.46549	1.29414	2.05858	1.81453	390	2	8	2	8	2	8		1.12536	1.23329	1.21057	1.1376	1.43478	1.34705
Grid	0.172678	1.5162	0.18143	0.0294405	0.000943341	1.69567	0.73429	1.52903	0.539346	0.181209	0.0226285	0.000584827	1.62095	0.45079	1.53667	0.203631	0.180058	0.0192475	0.000424931	1.57942	0.333216	1.52892	0.111195			1.43659	0.960196	1.70419	1.17524	2.49535	1.40441	390	3	7	3	7	3	7		1.19858	0.979896	1.30545	1.08408	1.57967	1.18508
Peri	0.172678	1.5162	0.202007	0.0270186	0.00159019	1.87132	0.632375	1.73249	0.44668	0.190468	0.0200712	0.000719337	1.59792	0.362664	1.54522	0.132367	0.188395	0.0155584	0.000489088	1.5423	0.260325	1.51329	0.0677776			2.42168	0.795222	2.09616	0.763947	2.8721	0.856044	390	8	4	6	1	6	2		1.55617	0.891752	1.44781	0.874041	1.69473	0.925226
Quad	0.172678	1.5162	0.193711	0.0267405	0.00115744	1.5767	0.582597	1.44835	0.344023	0.193045	0.0201618	0.000821313	1.53183	0.372751	1.47096	0.14099	0.192492	0.0146771	0.000608012	1.50087	0.254998	1.47109	0.0670589			1.76264	0.612463	2.39331	0.813712	3.57047	0.846966	390	7	1	7	2	7	1		1.32765	0.7826	1.54703	0.90206	1.88957	0.920308
Square	0.172678	1.5162	0.178271	0.0252653	0.000669617	1.67576	0.68698	1.52276	0.471985	0.178153	0.0181068	0.000357832	1.61833	0.408143	1.54706	0.167533	0.178662	0.0132776	0.000212103	1.58549	0.280808	1.54849	0.0798958			1.01975	0.840272	1.04273	0.966903	1.24555	1.0091	390	1	5	1	6	1	3		1.00982	0.916664	1.02114	0.983312	1.11604	1.00454
OldEPI	0.172678	1.5162	0.192388	0.0273149	0.00113459	1.62552	0.631425	1.48712	0.399543	0.191793	0.0215413	0.000829411	1.56922	0.401546	1.49872	0.161545	0.191143	0.0178134	0.000658273	1.54827	0.304453	1.50636	0.0927885			1.72784	0.711305	2.41691	0.932342	3.86562	1.17194	390	5	2	8	5	8	5		1.31447	0.843389	1.55464	0.965579	1.96612	1.08256
EPI3	0.172678	1.5162	0.189872	0.027621	0.00105855	1.66102	0.724241	1.50213	0.524723	0.189197	0.0209068	0.000709971	1.58467	0.397733	1.51747	0.158193	0.185843	0.0162286	0.000436685	1.58871	0.293174	1.54971	0.0870739			1.61205	0.934162	2.06886	0.912999	2.56437	1.09976	390	4	6	5	3	5	4		1.26967	0.966521	1.43835	0.95551	1.60137	1.04869
EPI5	0.172678	1.5162	0.190284	0.0289126	0.00114591	1.64044	0.633996	1.50236	0.402142	0.187232	0.0212739	0.000664398	1.60075	0.399192	1.5335	0.159654	0.185341	0.0163903	0.000428993	1.59508	0.309745	1.55279	0.0972808			1.74508	0.715933	1.93606	0.921427	2.51921	1.22867	390	6	3	4	4	4	6		1.32102	0.846128	1.39142	0.95991	1.5872	1.10846
			population 27
	true	true	7							15							30
	mean	rr	mean	stdev	mse	mrr	srr	prr	mse_rr	mean	stdev	mse	mrr	srr	prr	mse_rr	mean	stdev	mse	mrr	srr	prr	mse_rr
Random	0.089296	1.41951	0.0875532	0.0189572	0.000362413	1.25427	0.616332	1.36504	0.382832	0.0897577	0.013111	0.000172111	1.73219	1.07208	1.37422	1.15141	0.089115	0.00947265	8.97637e-05	1.75753	1.12257	1.40149	1.26049
NewEPI	0.089296	1.41951	0.0887032	0.0197298	0.000389616	1.22524	0.671874	1.32196	0.460931	0.0884382	0.0152725	0.000233985	1.68179	1.07741	1.34058	1.16704	0.0889981	0.0127064	0.000161541	1.87639	1.41669	1.37929	2.00863			1.07506	1.204	1.3595	1.01358	1.79963	1.59353	403	4	2	5	4	7	8		1.03685	1.09727	1.16597	1.00677	1.3415	1.26235
Grid	0.089296	1.41951	0.0885834	0.0215768	0.000466066	1.63234	1.1578	1.30189	1.35434	0.0884005	0.0165593	0.000275012	1.70206	1.22207	1.2948	1.50901	0.0876197	0.0131977	0.000176989	1.64717	1.15304	1.32623	1.3382			1.28601	3.53767	1.59787	1.31058	1.97172	1.06165	403	8	7	8	6	8	7		1.13402	1.88087	1.26407	1.1448	1.40418	1.03037
Peri	0.089296	1.41951	0.093232	0.0200987	0.00041945	1.62124	1.0986	1.30086	1.221	0.0871228	0.0146887	0.000220481	1.61115	0.986329	1.27838	0.992763	0.0878046	0.0113409	0.00013084	1.63622	1.02145	1.31561	1.05416			1.15738	3.18939	1.28103	0.862217	1.45761	0.836307	403	6	5	4	1	3	5		1.07582	1.78589	1.13183	0.928556	1.20731	0.914498
Quad	0.089296	1.41951	0.0887558	0.0192377	0.000370381	1.51459	1.02115	1.24685	1.07256	0.0876777	0.0143177	0.000207615	1.59743	1.02023	1.26425	1.06497	0.0879428	0.0102721	0.000107347	1.57249	0.961713	1.28991	0.941688			1.02199	2.80164	1.20628	0.924934	1.19589	0.747082	403	1	4	2	2	2	2		1.01093	1.67381	1.09831	0.961735	1.09357	0.864339
Square	0.089296	1.41951	0.0862893	0.0196321	0.00039446	1.23031	0.600492	1.34578	0.366027	0.0866209	0.0132542	0.00018283	1.72848	1.05786	1.36394	1.12216	0.0858568	0.00925405	9.74654e-05	1.65875	1.01653	1.35301	1.03776			1.08843	0.956103	1.06228	0.974596	1.0858	0.823297	403	5	1	1	3	1	4		1.04328	0.977805	1.03067	0.987216	1.04202	0.907357
OldEPI	0.089296	1.41951	0.0870128	0.0191939	0.000373619	1.63868	1.16084	1.32699	1.35611	0.0888599	0.0157251	0.000247469	1.70191	1.24134	1.29595	1.55619	0.0877769	0.0122581	0.000152569	1.67192	0.993197	1.34147	0.992531			1.03092	3.54231	1.43784	1.35156	1.69967	0.787418	403	2	8	7	7	5	3		1.01534	1.8821	1.1991	1.16256	1.30371	0.887366
EPI3	0.089296	1.41951	0.0877489	0.0208209	0.000435903	1.69859	1.14129	1.42474	1.30257	0.0878654	0.0155542	0.00024398	1.79805	1.29626	1.37877	1.68195	0.0865948	0.0120717	0.000153022	1.734	1.06784	1.3984	1.14073			1.20278	3.40246	1.41757	1.46078	1.70472	0.904989	403	7	6	6	8	6	6		1.09671	1.84458	1.19062	1.20863	1.30565	0.951309
EPI5	0.089296	1.41951	0.0864543	0.0192914	0.000380233	1.5125	0.990512	1.27358	1.00241	0.0861897	0.0143248	0.000214849	1.73654	1.14692	1.36263	1.31866	0.0860037	0.0112039	0.000136366	1.67316	0.957196	1.39577	0.916788			1.04917	2.61841	1.24831	1.14526	1.51917	0.727328	403	3	3	3	5	4	1		1.02429	1.61815	1.11728	1.07017	1.23255	0.852835
			population 28
	true	true	7							15							30
	mean	rr	mean	stdev	mse	mrr	srr	prr	mse_rr	mean	stdev	mse	mrr	srr	prr	mse_rr	mean	stdev	mse	mrr	srr	prr	mse_rr
Random	0.218145	1.521	0.214612	0.0278704	0.000789241	1.66494	0.617799	1.54427	0.382217	0.214592	0.0197176	0.000401408	1.57858	0.344453	1.52711	0.118685	0.214192	0.0135751	0.000199909	1.57493	0.228657	1.5512	0.0531961
NewEPI	0.218145	1.521	0.215219	0.0344374	0.0011945	1.69257	0.666403	1.53655	0.444335	0.216879	0.027741	0.000771166	1.60443	0.476636	1.50846	0.227339	-nan	0		-nan	-nan	-nan				1.51347	1.16252	1.92115	1.91548	0	0	416	7	7	7	8	1	1		1.23023	1.0782	1.38606	1.38401	0	0
Grid	0.218145	1.521	0.220649	0.0352754	0.00125062	1.61152	0.625476	1.46368	0.394506	0.218152	0.028177	0.000793943	1.56469	0.439582	1.48019	0.194898	0.215455	0.0231585	0.000543552	1.54185	0.34005	1.4914	0.11651			1.58459	1.03215	1.9779	1.64214	2.71899	2.1902	416	8	5	8	6	8	8		1.25881	1.01595	1.40638	1.28146	1.64894	1.47993
Peri	0.218145	1.521	0.215802	0.030271	0.000921823	1.61277	0.555894	1.4923	0.309842	0.211206	0.0224844	0.000553698	1.49269	0.386809	1.42454	0.158926	0.213262	0.0178705	0.000343198	1.50516	0.310524	1.45941	0.100218			1.16799	0.810644	1.37939	1.33905	1.71677	1.88395	416	3	3	3	3	5	6		1.08073	0.900357	1.17447	1.15717	1.31026	1.37257
Quad	0.218145	1.521	0.224327	0.028223	0.000834755	1.54967	0.489701	1.45161	0.244622	0.225329	0.0215939	0.000517906	1.51198	0.361656	1.45271	0.135459	0.225303	0.0165856	0.000326319	1.50295	0.256909	1.46839	0.06877			1.05767	0.640008	1.29023	1.14133	1.63233	1.29277	416	2	1	2	2	3	3		1.02843	0.800005	1.13588	1.06833	1.27763	1.137
Square	0.218145	1.521	0.214581	0.0279399	0.00079334	1.65076	0.532496	1.54498	0.284127	0.214076	0.0196068	0.000400983	1.59387	0.340725	1.54521	0.11668	0.214291	0.0139892	0.000210551	1.54718	0.229865	1.52391	0.0528464			1.00519	0.743366	0.998943	0.983102	1.05323	0.993427	416	1	2	1	1	2	2		1.00259	0.862187	0.999471	0.991515	1.02627	0.996708
OldEPI	0.218145	1.521	0.222792	0.0332044	0.00112413	1.60351	0.600866	1.46318	0.364383	0.221461	0.0251618	0.000644112	1.54043	0.408519	1.46472	0.170055	0.220907	0.0204687	0.000426596	1.54202	0.322788	1.49261	0.104998			1.42431	0.953341	1.60463	1.43283	2.13395	1.97379	416	6	4	6	4	7	7		1.19345	0.976392	1.26674	1.19701	1.4608	1.40492
EPI3	0.218145	1.521	0.220731	0.0323063	0.00105038	1.60784	0.689169	1.46201	0.478434	0.219531	0.0244927	0.000601813	1.58474	0.41506	1.51036	0.172388	0.215854	0.0191862	0.000373359	1.62146	0.308458	1.57841	0.0984422			1.33088	1.25173	1.49926	1.45248	1.86764	1.85056	416	5	8	5	5	6	5		1.15364	1.11881	1.22444	1.20519	1.36662	1.36035
EPI5	0.218145	1.521	0.219628	0.031719	0.00100829	1.64655	0.65702	1.50203	0.432035	0.216773	0.0235675	0.000557309	1.67676	0.446736	1.59368	0.204855	0.214221	0.0178299	0.000333303	1.65546	0.288607	1.62183	0.0934607			1.27755	1.13034	1.38839	1.72604	1.66727	1.75691	416	4	6	4	7	4	4		1.13029	1.06317	1.1783	1.31379	1.29123	1.32548
			population 29
	true	true	7							15							30
	mean	rr	mean	stdev	mse	mrr	srr	prr	mse_rr	mean	stdev	mse	mrr	srr	prr	mse_rr	mean	stdev	mse	mrr	srr	prr	mse_rr
Random	0.278861	1.62048	0.275383	0.039943	0.00160754	1.76919	0.655635	1.626	0.429888	0.27476	0.0280489	0.000803559	1.69215	0.397967	1.62677	0.158417	0.276572	0.0196838	0.000392691	1.66259	0.270507	1.63106	0.073286
NewEPI	0.278861	1.62048	0.27482	0.0495302	0.00246957	1.82079	0.710772	1.64864	0.50599	0.2722	0.0439827	0.00197885	1.71483	0.541309	1.62327	0.293023	0.272925	0.0404826	0.00167408	1.69256	0.437112	1.63166	0.191192			1.53624	1.17703	2.4626	1.84969	4.26309	2.60885	429	3	2	3	4	3	3		1.23945	1.08491	1.56927	1.36003	2.06472	1.61519
Grid	0.278861	1.62048	0.291716	0.0530477	0.00297931	1.95157	1.08819	1.66736	1.18636	0.292068	0.0499108	0.00266551	1.80944	0.691124	1.6597	0.479191	0.29193	0.0473738	0.00241508	1.76758	0.550371	1.67495	0.305875			1.85333	2.75969	3.31713	3.02486	6.15006	4.17372	429	5	8	5	7	5	7		1.36137	1.66123	1.8213	1.73921	2.47993	2.04297
Peri	0.278861	1.62048	0.311128	0.0413439	0.00275048	1.95635	0.966038	1.74302	0.948245	0.312084	0.0368858	0.00246433	1.81925	0.514174	1.72121	0.274521	0.314666	0.0331511	0.00238099	1.83207	0.433797	1.7621	0.208236			1.71099	2.2058	3.06677	1.7329	6.06327	2.84142	429	4	6	4	3	4	5		1.30805	1.48519	1.75122	1.3164	2.46237	1.68565
Quad	0.278861	1.62048	0.307478	0.0399685	0.00241641	1.95144	0.910091	1.73271	0.840861	0.307164	0.0306846	0.0017426	1.81814	0.505235	1.71693	0.264565	0.305978	0.0275297	0.00149322	1.75298	0.373807	1.69444	0.145202			1.50318	1.956	2.16861	1.67005	3.80252	1.9813	429	2	4	2	2	2	2		1.22604	1.39857	1.47262	1.2923	1.95	1.40759
Square	0.278861	1.62048	0.283264	0.0384495	0.00149775	1.82347	0.625178	1.68528	0.395047	0.283	0.0269238	0.000742022	1.75634	0.398445	1.6896	0.163536	0.281717	0.0200764	0.000411218	1.70984	0.265698	1.67884	0.0740013			0.931704	0.918953	0.92342	1.03231	1.04718	1.00976	429	1	1	1	1	1	1		0.965248	0.95862	0.960947	1.01603	1.02332	1.00487
OldEPI	0.278861	1.62048	0.304267	0.0506757	0.00321349	2.04023	1.03451	1.74925	1.08679	0.305194	0.0479211	0.00298986	1.92522	0.771643	1.7414	0.610055	0.306987	0.0458977	0.00289767	1.84678	0.582423	1.73509	0.352352			1.99901	2.52808	3.72077	3.85093	7.379	4.80791	429	6	7	6	8	8	8		1.41386	1.59	1.92893	1.96238	2.71643	2.19269
EPI3	0.278861	1.62048	0.30587	0.0511413	0.00334492	1.99504	0.928788	1.75399	0.880472	0.307568	0.0470057	0.00303363	1.87387	0.612935	1.74939	0.392307	0.310572	0.042752	0.00283332	1.81017	0.462233	1.74202	0.228431			2.08077	2.04814	3.77524	2.47642	7.21513	3.11699	429	7	5	7	6	7	6		1.44249	1.43113	1.943	1.57366	2.6861	1.7655
EPI5	0.278861	1.62048	0.307966	0.0500488	0.00335198	1.95371	0.875687	1.72743	0.778266	0.311013	0.0452563	0.00308188	1.82441	0.568167	1.71693	0.332116	0.311105	0.0407678	0.00270169	1.79569	0.439545	1.73289	0.205836			2.08516	1.81039	3.83529	2.09647	6.87993	2.80867	429	8	3	8	5	6	4		1.44401	1.34551	1.95839	1.44792	2.62296	1.67591
			population 30
	true	true	7							15							30
	mean	rr	mean	stdev	mse	mrr	srr	prr	mse_rr	mean	stdev	mse	mrr	srr	prr	mse_rr	mean	stdev	mse	mrr	srr	prr	mse_rr
Random	0.0507067	2.10878	0.0473554	0.0152733	0.000244505	2.77801	2.28101	2.18893	5.20943	0.0471126	0.0107268	0.000127982	2.41839	1.18507	2.18348	1.40997	0.0475674	0.00717376	6.1318e-05	2.25293	0.705844	2.16108	0.500951
NewEPI	0.0507067	2.10878	0.0478214	0.017607	0.000318331	2.75371	2.34629	2.12485	5.50534	0.0528745	0.0158431	0.000255703	2.37051	1.24764	2.13079	1.55709	0.0635268	-nan	0.000164355	2.09492	0	2.09492	0.0001921			1.30194	1.0568	1.99797	1.10434	2.68037	0.00038347	442	4	7	6	7	6	1		1.14103	1.02801	1.41349	1.05088	1.63718	0.0195824
Grid	0.0507067	2.10878	0.0500607	0.0205471	0.000422601	2.55485	2.48518	1.99396	6.1893	0.0491525	0.0168742	0.000287154	2.39734	1.54434	2.10157	2.38504	0.0535165	0.0147795	0.000226329	2.246	0.880351	2.1294	0.775443			1.72839	1.1881	2.24371	1.69155	3.69106	1.54794	442	6	8	7	8	8	8		1.31468	1.09	1.4979	1.3006	1.92121	1.24416
Peri	0.0507067	2.10878	0.047641	0.0164177	0.000278939	2.0333	1.73086	1.63855	3.21699	0.0473694	0.0132466	0.00018661	1.95008	1.05197	1.76675	1.22363	0.0479638	0.0108636	0.000125541	1.91301	0.651233	1.82538	0.50442			1.14083	0.617532	1.4581	0.867837	2.04738	1.00692	442	3	3	3	3	3	5		1.0681	0.785832	1.20752	0.931578	1.43087	1.00346
Quad	0.0507067	2.10878	0.0525595	0.0158173	0.00025362	2.06936	1.56154	1.71051	2.59703	0.0532205	0.0125247	0.000163187	1.93733	0.919585	1.77894	0.954431	0.0547243	0.0105232	0.000126879	2.07233	0.638273	1.98335	0.423125			1.03728	0.498524	1.27508	0.676915	2.06919	0.844644	442	1	2	2	1	4	2		1.01847	0.706062	1.1292	0.822749	1.43847	0.919045
Square	0.0507067	2.10878	0.0474219	0.0157578	0.000259098	2.73236	2.25726	2.14846	5.0968	0.0482825	0.0105717	0.000117638	2.36509	1.11741	2.1438	1.24983	0.0475044	0.00718592	6.18921e-05	2.26291	0.691464	2.16273	0.481033			1.05969	0.978379	0.919174	0.886424	1.00936	0.96024	442	2	6	1	4	1	3		1.02941	0.98913	0.958736	0.941501	1.00467	0.979918
OldEPI	0.0507067	2.10878	0.0535151	0.0211441	0.00045496	-nan	-nan	1.79722	0.0970696	0.0536875	0.017276	0.000307345	2.07851	1.08079	1.89613	1.21333	0.0543128	0.0140645	0.000210814	2.10213	0.792601	1.99755	0.640588			1.86074	0.0186334	2.40148	0.860533	3.43804	1.27874	442	8	1	8	2	7	7		1.36409	0.136504	1.54967	0.927649	1.8542	1.13082
EPI3	0.0507067	2.10878	0.0535386	0.0205587	0.00043068	2.37311	1.9948	1.91507	4.01675	0.0529123	0.0154677	0.000244114	2.254	1.12698	2.04674	1.27393	0.0522973	0.0116631	0.000138558	2.16243	0.73052	2.07683	0.53468			1.76144	0.771054	1.90742	0.903517	2.25966	1.06733	442	7	4	5	5	5	6		1.32719	0.878097	1.38109	0.950535	1.50322	1.03312
EPI5	0.0507067	2.10878	0.0546586	0.0184503	0.000356031	2.37623	2.01701	1.9065	4.10925	0.0534638	0.0143675	0.000214027	2.22591	1.22625	2.01713	1.51209	0.0530915	0.0108505	0.00012342	2.20761	0.709265	2.1135	0.503079			1.45613	0.788809	1.67232	1.07243	2.01279	1.00425	442	5	5	4	6	2	4		1.2067	0.888149	1.29318	1.03558	1.41873	1.00212
			population 31
	true	true	7							15							30
	mean	rr	mean	stdev	mse	mrr	srr	prr	mse_rr	mean	stdev	mse	mrr	srr	prr	mse_rr	mean	stdev	mse	mrr	srr	prr	mse_rr
Random	0.534074	1.45326	0.535356	0.0410197	0.00168426	1.53487	0.250576	1.50555	0.0655226	0.535544	0.0295218	0.000873697	1.51875	0.166815	1.50482	0.0304857	0.536412	0.0205817	0.000429073	1.51848	0.12042	1.51136	0.0178766
NewEPI	0.534074	1.45326	0.536377	0.0583065	0.00340495	1.5641	0.321842	1.51777	0.107744	0.536718	0.0516205	0.00267167	1.54164	0.273581	1.5094	0.0779983	0.534792	0.0516898	0.00267235	1.5242	0.236719	1.50013	0.0582327			2.02163	1.64438	3.05789	2.55852	6.2282	3.25748	455	2	8	2	8	2	8		1.42184	1.28233	1.74868	1.59954	2.49564	1.80485
Grid	0.534074	1.45326	0.577285	0.0594631	0.00540305	1.54809	0.300126	1.50716	0.0929808	0.577124	0.055071	0.00488612	1.52517	0.257044	1.4954	0.0678474	0.576246	0.0521245	0.00449544	1.5175	0.227389	1.49408	0.053372			3.20797	1.41907	5.59246	2.22555	10.4771	2.98558	455	3	7	3	7	3	7		1.79108	1.19125	2.36484	1.49183	3.23684	1.72788
Peri	0.534074	1.45326	0.596504	0.043699	0.00580711	1.44947	0.205585	1.42824	0.0428912	0.595457	0.0359824	0.00506261	1.47418	0.166976	1.46106	0.0279418	0.597271	0.0321627	0.0050283	1.4749	0.143191	1.46531	0.0206489			3.44787	0.654602	5.79446	0.916556	11.719	1.15508	455	4	1	4	2	4	3		1.85684	0.809075	2.40717	0.957369	3.4233	1.07475
Quad	0.534074	1.45326	0.612687	0.038873	0.00769111	1.47978	0.213066	1.45679	0.0454096	0.615994	0.0313022	0.00769071	1.46689	0.152566	1.4549	0.0232791	0.615101	0.0270422	0.00729666	1.47351	0.120551	1.46583	0.0146905			4.56647	0.693037	8.80249	0.763607	17.0056	0.821776	455	5	2	5	1	6	1		2.13693	0.832489	2.9669	0.873846	4.12379	0.906519
Square	0.534074	1.45326	0.554513	0.0405426	0.00206146	1.54636	0.26472	1.51334	0.0736863	0.556809	0.0294859	0.0013863	1.52052	0.158743	1.50811	0.0282079	0.554855	0.0205781	0.000855308	1.52496	0.117759	1.51796	0.0180533			1.22395	1.12459	1.5867	0.925282	1.99339	1.00988	455	1	6	1	3	1	2		1.10632	1.06047	1.25964	0.961916	1.41187	1.00493
OldEPI	0.534074	1.45326	0.615378	0.0543614	0.0095655	1.48588	0.242927	1.45725	0.0590294	0.61422	0.0487688	0.00880178	1.47764	0.208575	1.45649	0.043514	0.613548	0.0464696	0.00847554	1.47734	0.185123	1.46102	0.0343307			5.67935	0.900902	10.0742	1.42736	19.7532	1.92043	455	7	3	8	6	8	4		2.38314	0.949159	3.17398	1.19472	4.44445	1.3858
EPI3	0.534074	1.45326	0.616861	0.0534713	0.00971287	1.4841	0.252564	1.45225	0.0637896	0.613178	0.0476872	0.00853151	1.47813	0.204155	1.45816	0.0417033	0.611838	0.0444367	0.00802186	1.45203	0.188018	1.43642	0.0356344			5.76685	0.973551	9.76483	1.36796	18.6958	1.99335	455	8	4	7	5	7	6		2.40143	0.986687	3.12487	1.1696	4.32387	1.41186
EPI5	0.534074	1.45326	0.610952	0.0515524	0.00856788	1.5006	0.252575	1.47023	0.0640821	0.612074	0.0455027	0.0081545	1.47276	0.200335	1.45382	0.0401344	0.604204	0.043407	0.00680238	1.45929	0.187671	1.44505	0.0352878			5.08703	0.978016	9.33332	1.3165	15.8537	1.97397	455	6	5	6	4	5	5		2.25544	0.988947	3.05505	1.14739	3.98167	1.40498
			population 32
	true	true	7							15							30
	mean	rr	mean	stdev	mse	mrr	srr	prr	mse_rr	mean	stdev	mse	mrr	srr	prr	mse_rr	mean	stdev	mse	mrr	srr	prr	mse_rr
Random	0.160105	1.61376	0.160642	0.0267493	0.000715813	1.87902	0.925589	1.62372	0.856814	0.159702	0.0184887	0.000341994	1.73499	0.551328	1.62181	0.304027	0.159771	0.0132491	0.00017565	1.70223	0.340896	1.65316	0.117762
NewEPI	0.160105	1.61376	0.16322	0.0311606	0.000980686	1.93467	1.32723	1.62412	1.76165	0.16337	0.0260189	0.000687643	1.8303	0.669375	1.67304	0.451577	0.161678	0.0247533	0.0006152	1.77863	0.541049	1.67308	0.296253			1.37003	2.05604	2.01069	1.48532	3.50242	2.51568	468	4	7	4	4	7	8		1.17048	1.43389	1.41799	1.21874	1.87147	1.58609
Grid	0.160105	1.61376	0.154718	0.032274	0.00107063	1.8066	1.18416	1.48519	1.41877	0.155167	0.0278751	0.000801405	1.65845	0.68917	1.50213	0.487417	0.154189	0.0240104	0.000611498	1.58919	0.515995	1.49381	0.280639			1.49568	1.65586	2.34333	1.6032	3.48134	2.38309	468	8	5	8	6	6	7		1.22298	1.2868	1.53079	1.26618	1.86584	1.54373
Peri	0.160105	1.61376	0.173986	0.027927	0.000972599	2.2456	1.35284	1.87322	1.8975	0.162757	0.0225194	0.000514156	1.86647	0.737014	1.69223	0.549347	0.156919	0.0199031	0.000406284	1.69396	0.483176	1.59812	0.233704			1.35873	2.21459	1.50341	1.8069	2.31303	1.98453	468	3	8	2	8	3	5		1.16565	1.48815	1.22613	1.34421	1.52086	1.40874
Quad	0.160105	1.61376	0.1481	0.025271	0.000782743	1.73249	1.00543	1.46874	1.03192	0.147775	0.0192065	0.000520919	1.54717	0.520794	1.43578	0.302903	0.147391	0.0148664	0.000382655	1.49183	0.349458	1.43096	0.155537			1.0935	1.20437	1.52318	0.996303	2.17851	1.32077	468	1	1	3	1	2	2		1.04571	1.09744	1.23417	0.99815	1.47598	1.14925
Square	0.160105	1.61376	0.154659	0.0275021	0.000786024	1.80324	1.01807	1.56133	1.03922	0.152897	0.0191185	0.000417472	1.70417	0.569128	1.58907	0.324516	0.154031	0.0135196	0.000219673	1.60793	0.332771	1.55721	0.113934			1.09809	1.21288	1.2207	1.06739	1.25063	0.967494	468	2	2	1	2	1	1		1.0479	1.10131	1.10485	1.03315	1.11831	0.983613
OldEPI	0.160105	1.61376	0.148545	0.0300512	0.00103671	1.79468	1.22819	1.45302	1.53429	0.147955	0.0250823	0.000776744	1.60323	0.691085	1.43347	0.510103	0.148008	0.0218554	0.000623996	1.53076	0.485384	1.4346	0.267696			1.44829	1.79069	2.27122	1.67782	3.55249	2.27319	468	6	6	7	7	8	6		1.20345	1.33817	1.50706	1.29531	1.88481	1.50771
EPI3	0.160105	1.61376	0.147516	0.0297731	0.00104492	1.7288	1.17248	1.41749	1.41323	0.147925	0.0241781	0.000732933	1.59643	0.66208	1.43888	0.468933	0.149053	0.021076	0.000566344	1.54497	0.440866	1.45876	0.218388			1.45977	1.6494	2.14311	1.5424	3.22428	1.85448	468	7	4	6	5	4	4		1.20821	1.28429	1.46394	1.24194	1.79563	1.36179
EPI5	0.160105	1.61376	0.146867	0.0291174	0.00102307	1.78121	1.17274	1.45548	1.40037	0.148399	0.0241076	0.000718207	1.6071	0.622669	1.4616	0.410869	0.148481	0.0208937	0.000571664	1.53797	0.421529	1.46302	0.200409			1.42924	1.63439	2.10005	1.35142	3.25456	1.70181	468	5	3	5	3	5	3		1.19551	1.27843	1.44916	1.16251	1.80404	1.30453
			population 33
	true	true	7							15							30
	mean	rr	mean	stdev	mse	mrr	srr	prr	mse_rr	mean	stdev	mse	mrr	srr	prr	mse_rr	mean	stdev	mse	mrr	srr	prr	mse_rr
Random	0.265335	1.52119	0.264351	0.0326619	0.00106777	1.58181	0.492944	1.48628	0.244212	0.264816	0.0207114	0.000429231	1.51	0.290498	1.4697	0.0870403	0.26382	0.0156532	0.000247318	1.48926	0.190591	1.47106	0.0388379
NewEPI	0.265335	1.52119	0.264045	0.0451465	0.00203987	1.65299	0.663859	1.50744	0.440898	0.262968	0.039688	0.00158074	1.59523	0.46075	1.51207	0.212374	-nan	0		-nan	-nan	-nan				1.91041	1.80539	3.68272	2.43995	0	0	481	3	4	3	4	1	1		1.38217	1.34365	1.91904	1.56203	0	0
Grid	0.265335	1.52119	0.26857	0.0454416	0.0020754	1.7209	0.747886	1.53237	0.559458	0.269751	0.040048	0.00162334	1.60055	0.487865	1.50881	0.238166	0.269988	0.03522	0.0012621	1.5605	0.376538	1.50871	0.141937			1.94368	2.29087	3.78198	2.73627	5.10315	3.65459	481	4	6	4	6	4	5		1.39416	1.51356	1.94473	1.65417	2.25901	1.9117
Peri	0.265335	1.52119	0.275762	0.0358589	0.00139458	1.70368	0.650808	1.57868	0.426856	0.268949	0.0302828	0.000930109	1.58457	0.377187	1.53082	0.142363	0.277764	0.0260892	0.000835126	1.58358	0.273756	1.55701	0.0762254			1.30607	1.74789	2.16692	1.6356	3.37673	1.96265	481	2	3	2	2	3	3		1.14284	1.32208	1.47205	1.2789	1.83759	1.40095
Quad	0.265335	1.52119	0.308266	0.0357729	0.00312277	1.77859	0.545413	1.67073	0.319838	0.310235	0.0291112	0.00286347	1.72317	0.358958	1.67188	0.151558	0.307814	0.0234275	0.00235331	1.69321	0.280191	1.66292	0.0985944			2.92458	1.30967	6.67116	1.74124	9.51534	2.53861	481	5	2	7	3	7	4		1.71014	1.14441	2.58286	1.31956	3.08469	1.5933
Square	0.265335	1.52119	0.267156	0.0319681	0.00102528	1.6026	0.476913	1.50989	0.227574	0.267596	0.0225315	0.00051278	1.54175	0.300516	1.50062	0.090733	0.268041	0.0153332	0.000242429	1.53051	0.20003	1.51194	0.0400976			0.960204	0.931868	1.19465	1.04242	0.980234	1.03243	481	1	1	1	1	2	2		0.9799	0.965333	1.093	1.02099	0.990068	1.01609
OldEPI	0.265335	1.52119	0.30679	0.0463686	0.00386856	1.80976	0.865917	1.64039	0.764021	0.306944	0.0396752	0.00330543	1.7197	0.488754	1.63689	0.252267	0.30343	0.0355116	0.0027123	1.72375	0.387346	1.67522	0.173762			3.62304	3.12851	7.70081	2.89828	10.9669	4.47403	481	8	8	8	8	8	8		1.90343	1.76876	2.77503	1.70243	3.31163	2.11519
EPI3	0.265335	1.52119	0.305024	0.0435204	0.00346924	1.80561	0.802778	1.66446	0.664979	0.301515	0.0368315	0.00266555	1.80497	0.447054	1.73967	0.247591	0.297366	0.0322752	0.00206767	1.75311	0.327347	1.72106	0.147104			3.24906	2.72295	6.21006	2.84455	8.36039	3.78764	481	7	7	6	7	6	6		1.80251	1.65014	2.492	1.68658	2.89143	1.94619
EPI5	0.265335	1.52119	0.303665	0.0429281	0.00331201	1.83653	0.696539	1.70912	0.520484	0.298815	0.0362443	0.00243456	1.7958	0.41834	1.73795	0.221993	0.294442	0.0326628	0.00191408	1.79887	0.339708	1.76131	0.173059			3.10181	2.13128	5.67191	2.55046	7.73934	4.45593	481	6	5	5	5	5	7		1.76119	1.45989	2.38158	1.59702	2.78197	2.11091
			population 34
	true	true	7							15							30
	mean	rr	mean	stdev	mse	mrr	srr	prr	mse_rr	mean	stdev	mse	mrr	srr	prr	mse_rr	mean	stdev	mse	mrr	srr	prr	mse_rr
Random	0.289365	1.57855	0.298141	0.0356049	0.00134473	1.75389	0.781519	1.58505	0.610814	0.297456	0.0247782	0.000679423	1.66149	0.388198	1.594	0.150936	0.297495	0.0173008	0.000365415	1.63388	0.257759	1.60077	0.0669334
NewEPI	0.289365	1.57855	0.296588	0.0458783	0.00215699	1.8422	1.10572	1.58936	1.22273	0.2976	0.0391818	0.00160303	1.6544	0.486377	1.56143	0.236856	0.296764	0.0376261	0.00147047	1.63352	0.393865	1.57425	0.155148			1.60404	2.00181	2.3594	1.56924	4.02411	2.31795	494	6	8	6	7	7	7		1.26651	1.41485	1.53603	1.25269	2.00602	1.52248
Grid	0.289365	1.57855	0.302357	0.0480185	0.00247457	1.79883	0.831847	1.58089	0.691975	0.302103	0.0418829	0.00191643	1.70809	0.576139	1.58454	0.331972	0.30201	0.0372276	0.00154579	1.65674	0.415843	1.58787	0.173012			1.8402	1.13287	2.82068	2.19942	4.23024	2.58484	494	8	7	8	8	8	8		1.35654	1.06437	1.67949	1.48304	2.05675	1.60774
Peri	0.289365	1.57855	0.300486	0.0359833	0.00141847	1.7064	0.728461	1.53537	0.53252	0.290105	0.0303653	0.000922599	1.58246	0.463218	1.48776	0.222814	0.289264	0.0256849	0.000659724	1.52701	0.322851	1.47345	0.115279			1.05484	0.87182	1.35791	1.47621	1.80541	1.72229	494	1	5	2	6	2	4		1.02705	0.933713	1.1653	1.21499	1.34366	1.31236
Quad	0.289365	1.57855	0.306493	0.0372228	0.00167891	1.62655	0.585003	1.48494	0.350991	0.30591	0.0275994	0.00103546	1.56029	0.37772	1.49566	0.149543	0.306839	0.0225182	0.00081241	1.5473	0.27193	1.50909	0.0787706			1.24851	0.574629	1.52403	0.990769	2.22326	1.17685	494	3	1	3	1	3	2		1.11737	0.758043	1.23452	0.995374	1.49106	1.08483
Square	0.289365	1.57855	0.302111	0.0360346	0.00146095	1.73794	0.659648	1.58354	0.43516	0.302845	0.0249652	0.000804972	1.66714	0.394489	1.60132	0.15614	0.302819	0.0174755	0.000486403	1.6381	0.258335	1.60484	0.0674281			1.08643	0.712427	1.18479	1.03448	1.3311	1.00739	494	2	3	1	2	1	1		1.04232	0.844054	1.08848	1.01709	1.15373	1.00369
OldEPI	0.289365	1.57855	0.30886	0.0451966	0.00242279	1.68784	0.661351	1.51178	0.441843	0.306795	0.0390461	0.0018284	1.58254	0.459363	1.48763	0.219281	0.304372	0.0348987	0.00144313	1.58709	0.365636	1.52624	0.136426			1.80169	0.723368	2.69111	1.4528	3.94929	2.03823	494	7	4	7	5	6	6		1.34227	0.85051	1.64046	1.20532	1.98728	1.42767
EPI3	0.289365	1.57855	0.303194	0.0432144	0.00205873	1.67709	0.606369	1.5315	0.369897	0.303027	0.0366513	0.00152997	1.63375	0.447112	1.5507	0.200685	0.302058	0.0317525	0.00116933	1.63326	0.346451	1.58156	0.120037			1.53096	0.60558	2.25186	1.3296	3.20002	1.79338	494	5	2	5	4	5	5		1.23732	0.77819	1.50062	1.15308	1.78886	1.33917
EPI5	0.289365	1.57855	0.304365	0.0424683	0.00202856	1.73271	0.822815	1.54044	0.678477	0.302113	0.035423	0.0014173	1.6383	0.442958	1.55645	0.1967	0.299994	0.0309051	0.0010681	1.60956	0.311719	1.56807	0.0972786			1.50853	1.11077	2.08603	1.3032	2.92298	1.45336	494	4	6	4	3	4	3		1.22822	1.05393	1.44431	1.14158	1.70967	1.20556
			population 35
	true	true	7							15							30
	mean	rr	mean	stdev	mse	mrr	srr	prr	mse_rr	mean	stdev	mse	mrr	srr	prr	mse_rr	mean	stdev	mse	mrr	srr	prr	mse_rr
Random	0.0762383	1.53915	0.0786622	0.0180074	0.000330142	1.98366	1.43999	1.50085	2.07504	0.0785061	0.0130584	0.000175665	1.78511	1.1432	1.497	1.30868	0.0794248	0.00878666	8.7359e-05	1.61319	0.532276	1.49679	0.285112
NewEPI	0.0762383	1.53915	0.0795832	0.0190109	0.000372603	1.8315	1.34741	1.39953	1.83501	0.0776991	0.0156518	0.000247113	1.72682	1.24262	1.37743	1.57026	-nan	0		-nan	-nan	-nan				1.12861	0.884325	1.40673	1.19988	0	0	507	1	2	6	8	1	1		1.06236	0.940385	1.18606	1.09539	0	0
Grid	0.0762383	1.53915	0.0891934	0.0216056	0.000634637	2.08437	1.5343	1.57706	2.35551	0.0834643	0.0149922	0.000276981	1.85881	1.22019	1.50946	1.48975	0.0824157	0.0115706	0.000172039	1.65047	0.683312	1.52416	0.46714			1.92232	1.13517	1.57676	1.13835	1.96933	1.63844	507	8	7	8	7	7	7		1.38648	1.06544	1.25569	1.06694	1.40333	1.28002
Peri	0.0762383	1.53915	0.0859183	0.0192556	0.00046448	2.17488	1.53481	1.6491	2.36773	0.0825886	0.0137117	0.000228337	1.57071	0.907099	1.33615	0.864038	0.0796381	0.00969057	0.000105466	1.47106	0.495272	1.37137	0.273444			1.40691	1.14105	1.29985	0.660235	1.20727	0.959077	507	5	8	4	1	2	2		1.18613	1.0682	1.14011	0.812548	1.09876	0.979325
Quad	0.0762383	1.53915	0.0866605	0.0189746	0.000468658	2.03966	1.44302	1.54624	2.08236	0.0854444	0.013508	0.000267218	1.64546	0.972972	1.38446	0.970604	0.0846546	0.0101142	0.000173131	1.50095	0.61837	1.39964	0.401844			1.41957	1.00353	1.52118	0.741664	1.98183	1.40943	507	6	5	7	2	8	6		1.19146	1.00176	1.23336	0.861199	1.40778	1.18719
Square	0.0762383	1.53915	0.0812315	0.0189697	0.000384782	1.98443	1.38956	1.53175	1.93093	0.0822981	0.0129297	0.000203898	1.88605	1.19257	1.57071	1.42322	0.0824125	0.00890152	0.000117358	1.66467	0.527821	1.55664	0.278901			1.1655	0.930552	1.16072	1.08752	1.3434	0.978215	507	2	3	2	5	4	3		1.07959	0.964651	1.07737	1.04284	1.15905	0.989047
OldEPI	0.0762383	1.53915	0.0884962	0.019787	0.000541781	1.78499	1.31166	1.36558	1.75058	0.0826524	0.0140359	0.000238147	1.74625	1.18808	1.42645	1.42424	0.0823527	0.0104483	0.000146553	1.59689	0.566748	1.48408	0.324236			1.64106	0.843637	1.35569	1.0883	1.67759	1.13722	507	7	1	5	6	6	4		1.28104	0.918497	1.16434	1.04321	1.29522	1.06641
EPI3	0.0762383	1.53915	0.0828495	0.0200365	0.000445169	1.97438	1.47135	1.48273	2.16805	0.0808744	0.0142147	0.000223551	1.79037	1.10353	1.52454	1.21799	0.0778632	0.0108646	0.00012068	1.66189	0.632049	1.52991	0.399571			1.34842	1.04483	1.2726	0.930701	1.38142	1.40145	507	4	6	3	4	5	5		1.16121	1.02217	1.1281	0.964728	1.17534	1.18383
EPI5	0.0762383	1.53915	0.0808788	0.0195689	0.000404476	1.9606	1.42228	1.52542	2.02307	0.0792971	0.0137587	0.000198658	1.7814	1.08198	1.51685	1.17118	0.0788111	0.0101069	0.000108769	1.72202	0.75003	1.56996	0.563494			1.22516	0.974955	1.13089	0.894929	1.24508	1.9764	507	3	4	1	3	3	8		1.10687	0.987398	1.06343	0.946007	1.11583	1.40584
			population 36
	true	true	7							15							30
	mean	rr	mean	stdev	mse	mrr	srr	prr	mse_rr	mean	stdev	mse	mrr	srr	prr	mse_rr	mean	stdev	mse	mrr	srr	prr	mse_rr
Random	0.0907168	1.73566	0.0871174	0.021769	0.000486845	1.79965	1.08976	1.6275	1.19928	0.0870575	0.0156591	0.000258598	1.68014	0.625571	1.61265	0.406471	0.0876419	0.0111908	0.000134689	1.67604	0.43178	1.64353	0.194922
NewEPI	0.0907168	1.73566	0.0868374	0.0256771	0.000674363	1.73503	1.10071	1.55327	1.24483	0.0862168	0.0211825	0.000468948	1.66442	0.680491	1.57783	0.487978	0.0874012	0.0190197	0.000372742	1.6846	0.559929	1.62505	0.325755			1.38517	1.03798	1.81343	1.20053	2.76743	1.67121	520	4	6	4	4	5	6		1.17693	1.01881	1.34664	1.09569	1.66356	1.29275
Grid	0.0907168	1.73566	0.0928683	0.0293398	0.000865453	1.8412	1.16521	1.6541	1.36437	0.0917432	0.0255485	0.000653779	1.70363	0.784796	1.60342	0.633392	0.092432	0.0231912	0.000540774	1.67466	0.592294	1.59944	0.369368			1.77768	1.13766	2.52817	1.55827	4.01498	1.89495	520	8	8	8	8	8	8		1.3333	1.06661	1.59002	1.24831	2.00374	1.37657
Peri	0.0907168	1.73566	0.0877924	0.0238441	0.000577093	1.90082	0.959099	1.76895	0.920979	0.0885971	0.0182962	0.000339244	1.92459	0.705701	1.84655	0.51031	0.0886842	0.0162162	0.000267096	1.94014	0.534197	1.88077	0.306423			1.18537	0.767946	1.31186	1.25547	1.98306	1.57203	520	3	2	3	6	3	5		1.08875	0.876325	1.14536	1.12048	1.40821	1.25381
Quad	0.0907168	1.73566	0.090753	0.0227635	0.000518178	1.86235	1.00484	1.72164	1.0099	0.0916914	0.0178058	0.000317996	1.8412	0.660597	1.77423	0.437876	0.0920326	0.014161	0.000202265	1.82724	0.483449	1.7854	0.236197			1.06436	0.842092	1.22969	1.07726	1.50172	1.21175	520	2	4	2	2	2	2		1.03168	0.917656	1.10892	1.03791	1.22545	1.1008
Square	0.0907168	1.73566	0.0886496	0.0222149	0.000497775	1.75932	0.928394	1.61739	0.875903	0.0877927	0.0155617	0.000250717	1.67406	0.597276	1.6129	0.371809	0.0887076	0.0115643	0.00013777	1.6365	0.417454	1.60441	0.191494			1.02245	0.73036	0.969524	0.914725	1.02287	0.982416	520	1	1	1	1	1	1		1.01116	0.854611	0.984644	0.956412	1.01137	0.991169
OldEPI	0.0907168	1.73566	0.0920241	0.0284743	0.000812495	2.01116	1.12037	1.86236	1.27128	0.090778	0.0247631	0.000613215	1.89224	0.786555	1.79489	0.622177	0.0921284	0.0227058	0.000517546	1.84026	0.588092	1.77008	0.347037			1.6689	1.06004	2.37131	1.53068	3.84253	1.78039	520	7	7	7	7	7	7		1.29186	1.02958	1.5399	1.23721	1.96024	1.33431
EPI3	0.0907168	1.73566	0.0918796	0.0274221	0.000753324	1.93852	0.987829	1.78479	0.97822	0.0934778	0.0233131	0.000551124	1.81296	0.687986	1.72335	0.473476	0.0920029	0.0197202	0.00039054	1.73469	0.51614	1.67703	0.269838			1.54736	0.815676	2.1312	1.16485	2.89957	1.38434	520	6	3	6	3	6	4		1.24393	0.903148	1.45986	1.07928	1.70281	1.17658
EPI5	0.0907168	1.73566	0.09282	0.0268706	0.000726452	1.83694	1.01413	1.68496	1.03103	0.0906897	0.0217266	0.000472046	1.74402	0.705237	1.65123	0.504488	0.0896417	0.0177062	0.000314665	1.68559	0.504516	1.62769	0.266194			1.49216	0.859711	1.82541	1.24114	2.33624	1.36564	520	5	5	5	5	4	3		1.22154	0.927206	1.35108	1.11407	1.52848	1.16861
			population 37
	true	true	7							15							30
	mean	rr	mean	stdev	mse	mrr	srr	prr	mse_rr	mean	stdev	mse	mrr	srr	prr	mse_rr	mean	stdev	mse	mrr	srr	prr	mse_rr
Random	0.332505	1.53348	0.336472	0.0378154	0.00144574	1.51015	0.365637	1.45181	0.14036	0.335932	0.0274867	0.000767263	1.48147	0.257626	1.44763	0.0737414	0.335026	0.0198084	0.000398728	1.46038	0.171452	1.44529	0.0371733
NewEPI	0.332505	1.53348	0.332734	0.047725	0.00227773	1.56822	0.449058	1.48334	0.204167	0.332225	0.0436938	0.00190923	1.53638	0.355331	1.47928	0.129198	0.334952	0.0405874	0.00165332	1.49997	0.269291	1.46672	0.0769745			1.57547	1.45459	2.48836	1.75204	4.1465	2.0707	533	3	7	3	7	3	6		1.25518	1.20606	1.57745	1.32365	2.03629	1.43899
Grid	0.332505	1.53348	0.330127	0.0486827	0.00237566	1.55046	0.450314	1.46686	0.207221	0.329948	0.0446729	0.00200221	1.52529	0.354598	1.46949	0.129834	0.329751	0.0415101	0.00173067	1.50653	0.300217	1.46589	0.0946987			1.64321	1.47635	2.60954	1.76067	4.34048	2.54749	533	4	8	4	8	4	8		1.28188	1.21505	1.61541	1.3269	2.08338	1.59609
Peri	0.332505	1.53348	0.350294	0.0387234	0.00181595	1.29699	0.294139	1.25514	0.163991	0.343006	0.0295254	0.00098202	1.32776	0.22212	1.30232	0.102772	0.347341	0.0269746	0.000947736	1.36252	0.19993	1.34285	0.0763118			1.25607	1.16836	1.2799	1.39368	2.3769	2.05287	533	2	6	2	5	2	5		1.12074	1.08091	1.13133	1.18054	1.54172	1.43278
Quad	0.332505	1.53348	0.371214	0.0398695	0.00308796	1.42374	0.291847	1.38129	0.108336	0.369508	0.0296854	0.00225044	1.41477	0.229987	1.38975	0.0735523	0.369722	0.0244028	0.0019806	1.39098	0.171969	1.37626	0.0542915			2.1359	0.771845	2.93308	0.997436	4.9673	1.4605	533	5	1	5	1	5	2		1.46147	0.878547	1.71262	0.998717	2.22874	1.20851
Square	0.332505	1.53348	0.328315	0.0379794	0.00145999	1.48984	0.36904	1.4276	0.147401	0.327052	0.027278	0.000773824	1.4549	0.253075	1.42372	0.0760942	0.326708	0.0193784	0.000409128	1.44295	0.174836	1.42688	0.0419312			1.00986	1.05016	1.00855	1.03191	1.02608	1.12799	533	1	2	1	2	1	1		1.00492	1.02477	1.00427	1.01583	1.01296	1.06207
OldEPI	0.332505	1.53348	0.36994	0.0483516	0.00373926	1.44865	0.367382	1.38814	0.156093	0.368907	0.0423754	0.00312078	1.43525	0.295142	1.39503	0.106277	0.366845	0.0396601	0.00275216	1.42382	0.252201	1.39464	0.0828819			2.58639	1.11209	4.06742	1.44122	6.90235	2.22961	533	8	4	8	6	8	7		1.60823	1.05456	2.01678	1.20051	2.62723	1.49319
EPI3	0.332505	1.53348	0.368019	0.0468432	0.00345553	1.44479	0.363066	1.38709	0.153247	0.366154	0.0418285	0.00288188	1.42616	0.284975	1.3895	0.101941	0.36343	0.0385079	0.00243921	1.42965	0.236725	1.40413	0.0727701			2.39014	1.09181	3.75605	1.38241	6.11749	1.95759	533	6	3	7	4	7	4		1.54601	1.0449	1.93805	1.17576	2.47336	1.39914
EPI5	0.332505	1.53348	0.367842	0.0480621	0.00355867	1.45819	0.373693	1.39688	0.158306	0.36446	0.0420918	0.00279284	1.44965	0.287447	1.4132	0.0970931	0.36096	0.0377785	0.0022369	1.45665	0.230455	1.43442	0.0629224			2.46148	1.12785	3.64001	1.31667	5.61009	1.69268	533	7	5	6	3	6	3		1.56891	1.062	1.90788	1.14746	2.36856	1.30103
			population 38
	true	true	7							15							30
	mean	rr	mean	stdev	mse	mrr	srr	prr	mse_rr	mean	stdev	mse	mrr	srr	prr	mse_rr	mean	stdev	mse	mrr	srr	prr	mse_rr
Random	0.169332	1.49266	0.169613	0.029223	0.000854063	1.93594	1.35697	1.48912	1.84138	0.171063	0.0202082	0.000411368	1.7687	1.021	1.489	1.04245	0.170694	0.0141357	0.000201673	1.56597	0.489471	1.46138	0.24056
NewEPI	0.169332	1.49266	0.170652	0.039152	0.00153462	2.01626	1.61254	1.43409	2.60372	0.171001	0.0356985	0.00127717	1.71256	1.01612	1.41325	1.03881	0.169455	0.0341241	0.00116447	1.65028	0.778877	1.43346	0.610154			1.79685	1.414	3.10469	0.9965	5.77405	2.53639	546	6	7	6	4	6	7		1.34047	1.18912	1.76201	0.998248	2.40292	1.5926
Grid	0.169332	1.49266	0.178561	0.0413802	0.0017975	2.07286	1.6868	1.43694	2.8484	0.178793	0.0385399	0.00157483	1.83983	1.32879	1.42915	1.76972	0.178207	0.036495	0.00141065	1.67338	0.943114	1.4446	0.891774			2.10464	1.54688	3.82829	1.69764	6.99474	3.70707	546	8	8	8	8	8	8		1.45074	1.24374	1.9566	1.30294	2.64476	1.92538
Peri	0.169332	1.49266	0.16114	0.0307478	0.00101254	1.7195	1.37764	1.23874	1.96237	0.154905	0.0256476	0.000865938	1.47084	1.06232	1.18438	1.22356	0.149507	0.0227912	0.000912469	1.30473	0.550641	1.16122	0.413058			1.18555	1.0657	2.10502	1.17373	4.5245	1.71707	546	3	3	3	5	4	4		1.08883	1.03233	1.45087	1.08339	2.12709	1.31037
Quad	0.169332	1.49266	0.17854	0.0300199	0.000985982	1.73573	1.14371	1.35957	1.32579	0.177823	0.0234071	0.000619989	1.58707	0.9748	1.34646	0.971609	0.17942	0.0207654	0.000532969	1.51858	0.560066	1.37856	0.326693			1.15446	0.719996	1.50714	0.93204	2.64274	1.35805	546	2	1	2	2	2	2		1.07446	0.848526	1.22766	0.965422	1.62565	1.16535
Square	0.169332	1.49266	0.173387	0.0285534	0.00083174	2.01175	1.38238	1.52894	1.91229	0.174296	0.0211529	0.000472086	1.71398	1.00111	1.44608	1.00439	0.173675	0.0141595	0.000219353	1.58875	0.504893	1.47507	0.255226			0.973863	1.03851	1.1476	0.963487	1.08767	1.06097	546	1	2	1	3	1	1		0.986845	1.01907	1.07126	0.981574	1.04291	1.03003
OldEPI	0.169332	1.49266	0.176076	0.039375	0.00159587	1.83921	1.40702	1.32289	2.00853	0.175696	0.0357001	0.001315	1.78511	1.27979	1.38452	1.64956	0.175656	0.0336397	0.00117162	1.65248	0.733697	1.4413	0.540949			1.86857	1.09077	3.19665	1.58238	5.80951	2.2487	546	7	4	7	7	7	6		1.36695	1.0444	1.78792	1.25793	2.41029	1.49957
EPI3	0.169332	1.49266	0.175903	0.0383434	0.00151339	1.95963	1.58526	1.42579	2.51752	0.17447	0.0342434	0.00119901	1.81806	1.17543	1.49035	1.38164	0.173636	0.0311881	0.000991222	1.674	0.691661	1.52214	0.479264			1.77199	1.36719	2.91469	1.32537	4.915	1.99228	546	4	6	5	6	5	5		1.33116	1.16927	1.70725	1.15125	2.21698	1.41148
EPI5	0.169332	1.49266	0.17561	0.0385432	0.00152499	2.00411	1.50601	1.4863	2.26811	0.174812	0.0341797	0.00119828	1.77757	0.893206	1.52486	0.798854	0.174285	0.0294653	0.000892736	1.63091	0.575658	1.52405	0.332367			1.78557	1.23174	2.91292	0.76632	4.42665	1.38164	546	5	5	4	1	3	3		1.33625	1.10984	1.70673	0.875397	2.10396	1.17543
			population 39
	true	true	7							15							30
	mean	rr	mean	stdev	mse	mrr	srr	prr	mse_rr	mean	stdev	mse	mrr	srr	prr	mse_rr	mean	stdev	mse	mrr	srr	prr	mse_rr
Random	0.253744	1.18136	0.254452	0.0325887	0.00106252	1.24844	0.443438	1.15437	0.197366	0.253141	0.0237395	0.000563927	1.20403	0.274266	1.16144	0.0756186	0.254445	0.0165265	0.000273617	1.17273	0.177404	1.15167	0.0323537
NewEPI	0.253744	1.18136	0.257213	0.0413765	0.00172405	1.24439	0.545138	1.12428	0.300434	0.258667	0.0346205	0.00122281	1.20324	0.333886	1.14199	0.11303	0.257275	0.0326844	0.00108074	1.19288	0.262314	1.15216	0.0696613			1.6226	1.52222	2.16839	1.49474	3.94983	2.15312	559	2	5	2	4	2	4		1.27381	1.23378	1.47255	1.22259	1.98742	1.46735
Grid	0.253744	1.18136	0.270104	0.0425371	0.00207705	1.25352	0.514325	1.13129	0.267037	0.269961	0.0382349	0.0017249	1.22832	0.414883	1.14346	0.173564	0.269333	0.0354853	0.00150222	1.22008	0.342937	1.15631	0.118233			1.95483	1.35301	3.05872	2.29526	5.49025	3.6544	559	7	4	8	6	8	6		1.39815	1.16319	1.74892	1.51501	2.34313	1.91165
Peri	0.253744	1.18136	0.280402	0.0355439	0.00197402	1.30149	0.48007	1.18995	0.230541	0.27506	0.0288658	0.00128761	1.21307	0.301774	1.15932	0.0915533	0.277968	0.024894	0.00120651	1.17228	0.236028	1.14035	0.057391			1.85786	1.16809	2.28328	1.21072	4.4095	1.77386	559	4	3	3	2	5	3		1.36303	1.08078	1.51105	1.10033	2.09988	1.33187
Quad	0.253744	1.18136	0.281122	0.0345823	0.00194549	1.26955	0.468842	1.16331	0.220139	0.280476	0.0246203	0.00132076	1.26075	0.31095	1.20475	0.097237	0.281274	0.0211417	0.00120487	1.21808	0.217085	1.18705	0.0471583			1.83101	1.11538	2.34207	1.28589	4.40351	1.45759	559	3	2	4	3	4	2		1.35315	1.05612	1.53038	1.13397	2.09845	1.20731
Square	0.253744	1.18136	0.261573	0.0336588	0.00119421	1.29571	0.441905	1.19732	0.195535	0.261491	0.0242444	0.000647807	1.22474	0.270545	1.18371	0.0732001	0.262881	0.0176239	0.000394086	1.20729	0.17743	1.18718	0.0315153			1.12393	0.990723	1.14874	0.968017	1.44029	0.974086	559	1	1	1	1	1	1		1.06016	0.995351	1.07179	0.983878	1.20012	0.986958
OldEPI	0.253744	1.18136	0.279314	0.0371528	0.00203416	1.35655	0.700021	1.1955	0.490229	0.278559	0.0321675	0.00165053	1.27703	0.411542	1.1915	0.16947	0.278202	0.0291507	0.00144796	1.28136	0.36701	1.21353	0.135731			1.91446	2.48386	2.92685	2.24111	5.29192	4.19523	559	5	8	7	5	7	8		1.38364	1.57603	1.7108	1.49703	2.30042	2.04823
EPI3	0.253744	1.18136	0.279302	0.0379009	0.00208969	1.34698	0.569896	1.20233	0.325221	0.278173	0.032313	0.00164091	1.3179	0.431548	1.22529	0.188164	0.27676	0.0288127	0.00135991	1.31943	0.346929	1.25851	0.126312			1.96672	1.64781	2.90978	2.48832	4.97012	3.9041	559	8	6	6	8	6	7		1.4024	1.28367	1.70581	1.57744	2.22938	1.97588
EPI5	0.253744	1.18136	0.280004	0.0368877	0.00205029	1.34684	0.576966	1.20653	0.333523	0.277645	0.0313499	0.00155407	1.31166	0.416523	1.23212	0.176068	0.274542	0.0274712	0.00118722	1.32515	0.329795	1.2714	0.116872			1.92964	1.68987	2.75581	2.32837	4.339	3.61232	559	6	7	5	7	3	5		1.38911	1.29995	1.66006	1.5259	2.08303	1.90061
			population 40
	true	true	7							15							30
	mean	rr	mean	stdev	mse	mrr	srr	prr	mse_rr	mean	stdev	mse	mrr	srr	prr	mse_rr	mean	stdev	mse	mrr	srr	prr	mse_rr
Random	0.410395	1.60841	0.410587	0.0382915	0.00146628	1.68482	0.397595	1.61442	0.158118	0.410164	0.0267947	0.000718009	1.6797	0.285784	1.64366	0.0829151	0.411203	0.0202046	0.000408879	1.64813	0.188485	1.63125	0.0360483
NewEPI	0.410395	1.60841	0.411506	0.0523374	0.00274044	1.70289	0.521124	1.6067	0.271573	0.415079	0.0455003	0.00209222	1.66571	0.407223	1.59943	0.165911	0.413506	0.0448106	0.00201767	1.64513	0.354562	1.59509	0.125892			1.86898	1.71754	2.91391	2.00098	4.93464	3.49231	572	4	7	3	8	4	8		1.36711	1.31055	1.70702	1.41456	2.2214	1.86877
Grid	0.410395	1.60841	0.402165	0.0520898	0.00278108	1.69201	0.502384	1.59141	0.252679	0.401431	0.0476082	0.00234689	1.65733	0.405997	1.58944	0.165193	0.401725	0.0451456	0.00211329	1.62941	0.346415	1.58027	0.120795			1.8967	1.59804	3.26861	1.99232	5.16851	3.35093	572	5	6	5	7	5	7		1.37721	1.26414	1.80793	1.4115	2.27344	1.83055
Peri	0.410395	1.60841	0.380359	0.0397224	0.00248003	1.64867	0.43227	1.56873	0.188432	0.386422	0.031895	0.001592	1.60497	0.310254	1.56016	0.0985856	0.388013	0.0285264	0.00131471	1.56834	0.258326	1.53605	0.0719683			1.69138	1.19172	2.21724	1.189	3.2154	1.99644	572	2	3	2	3	2	3		1.30053	1.09166	1.48904	1.09041	1.79315	1.41296
Quad	0.410395	1.60841	0.443343	0.0380524	0.00253356	1.61969	0.373305	1.55583	0.142121	0.444591	0.0306904	0.00211127	1.59902	0.263364	1.56624	0.0711389	0.441187	0.0258192	0.00161478	1.58643	0.211464	1.5652	0.0465841			1.72789	0.898831	2.94045	0.857973	3.94929	1.29227	572	3	1	4	1	3	2		1.31449	0.948067	1.71477	0.926268	1.98728	1.13678
Square	0.410395	1.60841	0.401753	0.0379946	0.00151827	1.70458	0.415059	1.63363	0.17291	0.400817	0.0275588	0.000851225	1.671	0.267768	1.64009	0.0727033	0.402678	0.0198406	0.000453201	1.65524	0.187919	1.63821	0.0362016			1.03546	1.09355	1.18554	0.876841	1.1084	1.00425	572	1	2	1	2	1	1		1.01758	1.04573	1.08882	0.936398	1.05281	1.00212
OldEPI	0.410395	1.60841	0.444635	0.0510275	0.00377618	1.65787	0.527301	1.55193	0.281236	0.44365	0.0468554	0.00330132	1.61713	0.388368	1.55159	0.154058	0.443571	0.043947	0.00303199	1.59955	0.330335	1.55188	0.112317			2.57536	1.77865	4.59788	1.85802	7.41537	3.11574	572	7	8	8	6	8	6		1.60479	1.33366	2.14427	1.36309	2.72312	1.76514
EPI3	0.410395	1.60841	0.444839	0.0502804	0.00371451	1.64743	0.450653	1.55569	0.205868	0.442438	0.0461867	0.00315996	1.63596	0.362917	1.57702	0.132694	0.441627	0.0417438	0.00271798	1.62632	0.317242	1.58344	0.101266			2.53329	1.30199	4.40101	1.60036	6.64741	2.80918	572	6	4	7	5	7	5		1.59163	1.14105	2.09786	1.26505	2.57826	1.67606
EPI5	0.410395	1.60841	0.444547	0.0511927	0.00378705	1.63897	0.458237	1.55032	0.213356	0.442866	0.0447512	0.00305704	1.62405	0.359288	1.56883	0.130654	0.439783	0.0417166	0.00260393	1.6402	0.316326	1.59882	0.100154			2.58277	1.34934	4.25766	1.57576	6.36847	2.77833	572	8	5	6	4	6	4		1.6071	1.16161	2.06341	1.25529	2.52358	1.66683
			population 41
	true	true	7							15							30
	mean	rr	mean	stdev	mse	mrr	srr	prr	mse_rr	mean	stdev	mse	mrr	srr	prr	mse_rr	mean	stdev	mse	mrr	srr	prr	mse_rr
Random	0.303492	1.70791	0.302854	0.0367074	0.00134784	1.95117	0.606159	1.82821	0.381901	0.30283	0.0255384	0.000652648	1.89956	0.397525	1.83901	0.175213	0.303743	0.0173348	0.000300558	1.84992	0.25214	1.82359	0.0769564
NewEPI	0.303492	1.70791	0.303815	0.0536692	0.00288049	2.04002	0.8094	1.84924	0.675103	0.30145	0.0492011	0.00242492	1.95738	0.579849	1.85042	0.356534	0.304923	0.0468986	0.00220153	1.72847	0.427753	1.66356	0.18494			2.13711	1.76774	3.71551	2.03486	7.32479	2.40317	585	7	8	7	8	8	8		1.46189	1.32956	1.92756	1.42648	2.70644	1.55022
Grid	0.303492	1.70791	0.31673	0.0545052	0.00314606	1.85703	0.681612	1.7061	0.464598	0.31503	0.0496338	0.00259664	1.7956	0.493194	1.70688	0.243241	0.311902	0.0459533	0.00218243	1.80192	0.412082	1.7453	0.17121			2.33415	1.21654	3.97862	1.38826	7.26127	2.22476	585	8	6	8	7	7	7		1.52779	1.10297	1.99465	1.17824	2.69467	1.49156
Peri	0.303492	1.70791	0.288065	0.0425432	0.00204792	1.56071	0.488239	1.46513	0.297319	0.286309	0.0362166	0.0016069	1.55984	0.387103	1.49732	0.194197	0.287857	0.0319126	0.00126287	1.51826	0.291619	1.48027	0.136862			1.51941	0.778525	2.46212	1.10835	4.20174	1.77843	585	3	1	3	3	3	5		1.23264	0.882341	1.56911	1.05278	2.04981	1.33358
Quad	0.303492	1.70791	0.309399	0.0375349	0.00144376	1.67335	0.528681	1.57265	0.297799	0.309408	0.0299317	0.000930906	1.64474	0.336213	1.59311	0.126218	0.308579	0.0249113	0.00064645	1.61844	0.255273	1.59021	0.0790176			1.07117	0.779781	1.42635	0.720369	2.15083	1.02678	585	2	2	2	1	2	2		1.03497	0.883052	1.1943	0.848745	1.46657	1.0133
Square	0.303492	1.70791	0.310174	0.0370878	0.00142015	1.93938	0.578015	1.81512	0.345595	0.308475	0.0261726	0.000709835	1.88116	0.366474	1.82799	0.148722	0.308415	0.0172844	0.000322986	1.85233	0.249398	1.82618	0.0761872			1.05365	0.904935	1.08762	0.848808	1.07462	0.990004	585	1	4	1	2	1	1		1.02648	0.951281	1.04289	0.921308	1.03664	0.994989
OldEPI	0.303492	1.70791	0.30751	0.0494094	0.00245743	1.77103	0.615428	1.64004	0.383358	0.307823	0.0442613	0.00197782	1.70475	0.44936	1.6281	0.208294	0.30662	0.0407458	0.00167	1.7118	0.380974	1.66014	0.147423			1.82324	1.00382	3.03045	1.1888	5.55634	1.91567	585	6	5	6	5	6	6		1.35027	1.00191	1.74082	1.09032	2.35719	1.38408
EPI3	0.303492	1.70791	0.305852	0.0480911	0.00231832	1.7464	0.577032	1.62903	0.339188	0.304856	0.0419676	0.00176314	1.78327	0.449401	1.71148	0.201974	0.30734	0.0370514	0.00138761	1.7692	0.343807	1.72715	0.118573			1.72003	0.888157	2.70152	1.15273	4.61679	1.54079	585	5	3	5	4	5	4		1.3115	0.942421	1.64363	1.07365	2.14867	1.24128
EPI5	0.303492	1.70791	0.306972	0.0474465	0.00226328	1.83118	0.722356	1.69056	0.522099	0.307296	0.0408251	0.00168116	1.79555	0.459599	1.72465	0.211511	0.307803	0.0355064	0.00127929	1.7713	0.336093	1.7328	0.113578			1.67919	1.36711	2.5759	1.20717	4.25638	1.47587	585	4	7	4	6	4	3		1.29584	1.16923	1.60496	1.09871	2.0631	1.21486
			population 42
	true	true	7							15							30
	mean	rr	mean	stdev	mse	mrr	srr	prr	mse_rr	mean	stdev	mse	mrr	srr	prr	mse_rr	mean	stdev	mse	mrr	srr	prr	mse_rr
Random	0.409894	1.33142	0.416105	0.0425473	0.00184885	1.31411	0.243952	1.2906	0.0611789	0.414664	0.0301523	0.000931914	1.28872	0.171714	1.27639	0.032514	0.412809	0.0219062	0.000488379	1.29337	0.121258	1.28699	0.0166775
NewEPI	0.409894	1.33142	0.411935	0.0540051	0.00292072	1.313	0.295414	1.28119	0.0897925	0.409956	0.0503338	0.0025335	1.29833	0.258816	1.27407	0.0702747	0.411617	0.0484579	0.00235114	1.30532	0.249874	1.28285	0.0647961			1.57975	1.4677	2.71859	2.16137	4.81417	3.88523	598	2	7	2	7	2	8		1.25688	1.21149	1.64882	1.47016	2.19412	1.9711
Grid	0.409894	1.33142	0.43486	0.0572455	0.00390035	1.37421	0.303538	1.34137	0.0922343	0.433972	0.0524118	0.00332675	1.36766	0.265912	1.34336	0.0708518	0.432042	0.0492187	0.00291301	1.36088	0.241437	1.34062	0.0583765			2.10961	1.50762	3.5698	2.17912	5.96466	3.50031	598	3	8	3	8	3	7		1.45245	1.22785	1.88939	1.47618	2.44227	1.87091
Peri	0.409894	1.33142	0.49438	0.045334	0.00919306	1.3848	0.236363	1.3612	0.0567543	0.477616	0.0387377	0.00608688	1.34425	0.190997	1.32757	0.0364947	0.481059	0.0357109	0.00633973	1.32909	0.163928	1.31745	0.0270675			4.97231	0.927679	6.53159	1.12243	12.9812	1.623	598	4	2	4	3	5	3		2.22987	0.963161	2.5557	1.05945	3.60294	1.27397
Quad	0.409894	1.33142	0.499664	0.0446926	0.0100561	1.36707	0.204214	1.35013	0.0420534	0.500842	0.0356216	0.00954044	1.3554	0.152078	1.34592	0.023338	0.500685	0.0288756	0.00907681	1.356	0.128207	1.3488	0.0167391			5.4391	0.687385	10.2375	0.717782	18.5856	1.00369	598	5	1	7	1	7	2		2.33219	0.829087	3.1996	0.84722	4.3111	1.00184
Square	0.409894	1.33142	0.428941	0.0425058	0.00216953	1.29458	0.235646	1.2711	0.0591675	0.427376	0.0315222	0.00129927	1.29038	0.166355	1.27823	0.0305032	0.427225	0.021476	0.000761582	1.28949	0.117287	1.28378	0.0160258			1.17345	0.967124	1.39419	0.938155	1.55941	0.960922	598	1	3	1	2	1	1		1.08326	0.983425	1.18076	0.968584	1.24876	0.980267
OldEPI	0.409894	1.33142	0.500458	0.0552524	0.0112547	1.37317	0.255658	1.34711	0.0656072	0.497157	0.0507681	0.0101922	1.36483	0.215448	1.34662	0.0466489	0.494504	0.048951	0.00955505	1.36592	0.197555	1.35131	0.0394236			6.08739	1.07238	10.9369	1.43473	19.5648	2.36388	598	8	4	8	4	8	4		2.46726	1.03556	3.3071	1.1978	4.42322	1.53749
EPI3	0.409894	1.33142	0.496622	0.0548687	0.0105323	1.37714	0.258212	1.35221	0.0671057	0.490868	0.0502443	0.00908128	1.3718	0.214894	1.35472	0.0467223	0.481028	0.0463272	0.00720626	1.39026	0.196947	1.37585	0.0407621			5.69669	1.09688	9.74476	1.43699	14.7555	2.44414	598	7	5	6	5	6	5		2.38677	1.04732	3.12166	1.19875	3.84128	1.56337
EPI5	0.409894	1.33142	0.496418	0.0542897	0.0104338	1.37701	0.259082	1.3512	0.0675147	0.485174	0.0486576	0.00803464	1.38637	0.216452	1.36764	0.0481634	0.474273	0.0431685	0.00600817	1.40966	0.195761	1.39566	0.0424491			5.64339	1.10356	8.62165	1.48131	12.3023	2.54529	598	6	6	5	6	4	6		2.37558	1.05051	2.93627	1.21709	3.50746	1.5954
			population 43
	true	true	7							15							30
	mean	rr	mean	stdev	mse	mrr	srr	prr	mse_rr	mean	stdev	mse	mrr	srr	prr	mse_rr	mean	stdev	mse	mrr	srr	prr	mse_rr
Random	0.16054	1.56232	0.161584	0.024451	0.000598941	1.74396	1.19704	1.37634	1.46749	0.16117	0.0168912	0.000285709	1.54113	0.753814	1.36342	0.607797	0.161808	0.0128239	0.00016606	1.44266	0.381899	1.36996	0.182849
NewEPI	0.16054	1.56232	0.161874	0.0272895	0.000746496	1.65426	1.05249	1.3335	1.16009	0.162412	0.021668	0.000473006	1.52556	0.716211	1.33735	0.56357	0.161862	0.0182901	0.000336275	1.72205	0.92104	1.51936	0.85016			1.24636	0.790527	1.65555	0.927234	2.02502	4.64952	611	3	1	5	4	6	8		1.1164	0.889116	1.28668	0.96293	1.42303	2.15627
Grid	0.16054	1.56232	0.172201	0.0266797	0.000847785	2.00064	1.45811	1.59286	2.12702	0.170976	0.0211394	0.000555784	1.80978	0.944511	1.57338	0.892223	0.170153	0.0173198	0.000392385	1.72687	0.625463	1.59841	0.392506			1.41547	1.44942	1.94528	1.46796	2.36291	2.14661	611	8	8	8	6	8	5		1.18974	1.20392	1.39473	1.2116	1.53718	1.46513
Peri	0.16054	1.56232	0.159906	0.0256089	0.000656218	1.7007	1.10336	1.39352	1.2459	0.161383	0.019092	0.000365215	1.60249	0.680748	1.43444	0.479771	0.163721	0.0152453	0.000242538	1.53249	0.476922	1.44362	0.241544			1.09563	0.848997	1.27827	0.789361	1.46054	1.321	611	1	2	2	1	2	2		1.04672	0.92141	1.13061	0.88846	1.20853	1.14935
Quad	0.16054	1.56232	0.171682	0.0254324	0.000770951	1.87303	1.22414	1.54042	1.499	0.172194	0.0179181	0.000456874	1.65929	0.726402	1.49765	0.531842	0.170734	0.0136782	0.000291011	1.62985	0.533891	1.53843	0.28561			1.28719	1.02147	1.59909	0.875033	1.75244	1.562	611	5	4	4	3	3	3		1.13454	1.01068	1.26455	0.935432	1.3238	1.2498
Square	0.16054	1.56232	0.165216	0.025389	0.000666466	1.76752	1.13526	1.42451	1.30781	0.167087	0.017479	0.000348379	1.62278	0.696465	1.44039	0.49993	0.165471	0.0125562	0.000181973	1.53711	0.401145	1.45818	0.171762			1.11274	0.891184	1.21935	0.822529	1.09582	0.939367	611	2	3	1	2	1	1		1.05487	0.944026	1.10424	0.906934	1.04682	0.969209
OldEPI	0.16054	1.56232	0.170959	0.0268853	0.000831375	1.95594	1.44499	1.54544	2.08828	0.170914	0.020189	0.000515216	1.72104	0.778795	1.52451	0.607951	0.171194	0.0162783	0.000378491	1.69564	0.627982	1.57373	0.394492			1.38807	1.42303	1.80328	1.00025	2.27924	2.15747	611	7	7	7	5	7	6		1.17817	1.19291	1.34286	1.00013	1.50971	1.46883
EPI3	0.16054	1.56232	0.169874	0.0259942	0.000762822	1.90525	1.33667	1.55058	1.78682	0.170074	0.0198697	0.000485702	1.81815	0.951356	1.60759	0.907128	0.168355	0.015288	0.000294797	1.75462	0.554435	1.65353	0.315717			1.27362	1.2176	1.69999	1.49249	1.77524	1.72665	611	4	5	6	7	4	4		1.12855	1.10345	1.30383	1.22167	1.33238	1.31402
EPI5	0.16054	1.56232	0.17108	0.0264361	0.000809959	1.9632	1.36721	1.57598	1.86945	0.168863	0.019228	0.000438988	1.86838	0.986112	1.63351	0.977485	0.16875	0.0155036	0.000307766	1.76479	0.660609	1.64951	0.444006			1.35232	1.27391	1.53648	1.60824	1.85334	2.42826	611	6	6	3	8	5	7		1.16289	1.12867	1.23955	1.26817	1.36137	1.55829
			population 44
	true	true	7							15							30
	mean	rr	mean	stdev	mse	mrr	srr	prr	mse_rr	mean	stdev	mse	mrr	srr	prr	mse_rr	mean	stdev	mse	mrr	srr	prr	mse_rr
Random	0.461095	1.29617	0.462899	0.0439015	0.0019306	1.36977	0.289612	1.32484	0.0846971	0.46139	0.0302322	0.000914073	1.34831	0.199752	1.32465	0.040712	0.461236	0.0229817	0.000528178	1.33197	0.147205	1.31905	0.0221928
NewEPI	0.461095	1.29617	0.463678	0.0556613	0.00310485	1.34429	0.31547	1.29249	0.0995349	0.464462	0.0515213	0.00266578	1.31352	0.274588	1.27448	0.075869	0.461725	0.0483847	0.00234148	1.3173	0.237157	1.2898	0.056284			1.60823	1.17519	2.91638	1.86356	4.43312	2.53614	624	2	3	2	4	2	4		1.26816	1.08406	1.70774	1.36512	2.1055	1.59253
Grid	0.461095	1.29617	0.487038	0.0583435	0.004077	1.34509	0.350891	1.28683	0.123212	0.486767	0.0542761	0.00360495	1.31779	0.283044	1.28205	0.0803133	0.485957	0.0510991	0.00322924	1.30759	0.247874	1.28238	0.0616317			2.11178	1.45473	3.94383	1.97272	6.11391	2.7771	624	3	5	3	5	3	5		1.4532	1.20612	1.98591	1.40454	2.47263	1.66646
Peri	0.461095	1.29617	0.523233	0.0418086	0.00560909	1.44251	0.280944	1.40502	0.0907779	0.514477	0.037707	0.00427146	1.37751	0.219948	1.35598	0.0519544	0.510863	0.0328334	0.00355489	1.38257	0.191317	1.36831	0.0418064			2.90537	1.07179	4.67299	1.27614	6.73047	1.88378	624	4	2	4	2	4	3		1.70451	1.03528	2.16171	1.12967	2.59431	1.37251
Quad	0.461095	1.29617	0.523109	0.0435533	0.00574263	1.4341	0.315299	1.39059	0.108329	0.521056	0.0329999	0.00468431	1.41792	0.223252	1.39635	0.0598775	0.521654	0.0302537	0.00458268	1.40944	0.175593	1.39716	0.0410319			2.97454	1.27901	5.12466	1.47076	8.67639	1.84888	624	5	4	5	3	6	2		1.72468	1.13093	2.26377	1.21275	2.94557	1.35974
Square	0.461095	1.29617	0.477004	0.0433551	0.00213276	1.37685	0.290653	1.33161	0.0857352	0.47737	0.0326212	0.00132902	1.34167	0.187777	1.32206	0.0359305	0.477352	0.0212776	0.000717026	1.34829	0.137041	1.33728	0.0204703			1.10472	1.01226	1.45395	0.882554	1.35755	0.922383	624	1	1	1	1	1	1		1.05105	1.00611	1.2058	0.939443	1.16514	0.960408
OldEPI	0.461095	1.29617	0.522757	0.0530501	0.00661652	1.45431	0.381058	1.39178	0.154346	0.522211	0.0491191	0.00614785	1.43392	0.303778	1.39179	0.101424	0.521559	0.0466478	0.00583191	1.42397	0.261758	1.39454	0.0781939			3.42719	1.82234	6.72578	2.49126	11.0416	3.52339	624	8	8	8	8	8	6		1.85127	1.34994	2.59341	1.57837	3.32288	1.87707
EPI3	0.461095	1.29617	0.522857	0.0515919	0.00647627	1.44543	0.363892	1.3864	0.140559	0.519213	0.0468819	0.00557561	1.45395	0.293367	1.4182	0.100956	0.516784	0.0438777	0.00502652	1.4621	0.244193	1.43901	0.0800335			3.35454	1.65955	6.09975	2.47975	9.51671	3.60628	624	6	7	7	7	7	7		1.83154	1.28823	2.46977	1.57472	3.08492	1.89902
EPI5	0.461095	1.29617	0.522483	0.0530596	0.00658381	1.45389	0.346314	1.40048	0.130814	0.518474	0.0476138	0.00555942	1.46023	0.287446	1.4246	0.0991195	0.512383	0.0437874	0.0045478	1.47557	0.240956	1.45296	0.0826429			3.41025	1.54449	6.08204	2.43465	8.61034	3.72386	624	7	6	6	6	5	8		1.84669	1.24278	2.46618	1.56034	2.93434	1.92973
			population 45
	true	true	7							15							30
	mean	rr	mean	stdev	mse	mrr	srr	prr	mse_rr	mean	stdev	mse	mrr	srr	prr	mse_rr	mean	stdev	mse	mrr	srr	prr	mse_rr
Random	0.369056	1.56815	0.366768	0.0385788	0.00149356	1.70064	0.436664	1.62642	0.194071	0.36839	0.0280463	0.000787038	1.65736	0.286442	1.61997	0.0847343	0.368917	0.0193448	0.00037424	1.63635	0.200849	1.61799	0.0428243
NewEPI	0.369056	1.56815	0.370014	0.0496387	0.00246492	1.71134	0.506249	1.61768	0.258741	0.373083	0.0417646	0.0017605	1.68663	0.381699	1.62644	0.149092	0.374056	0.0429963	0.00187368	1.67467	0.342686	1.63026	0.121291			1.65037	1.33323	2.23686	1.75952	5.00662	2.8323	637	2	7	2	7	2	8		1.28467	1.15466	1.49562	1.32647	2.23755	1.68294
Grid	0.369056	1.56815	0.393684	0.0504341	0.00315014	1.71234	0.515411	1.60194	0.26679	0.39491	0.0453141	0.0027218	1.68091	0.412861	1.60653	0.171927	0.394755	0.0418957	0.00241569	1.64594	0.342322	1.59526	0.117919			2.10915	1.37471	3.45828	2.02901	6.45491	2.75356	637	3	8	3	8	3	7		1.45229	1.17248	1.85964	1.42443	2.54065	1.65938
Peri	0.369056	1.56815	0.423145	0.0411386	0.004618	1.75673	0.432211	1.67916	0.19913	0.420952	0.0319102	0.00371146	1.68417	0.300676	1.64285	0.0959861	0.416105	0.0278453	0.00298897	1.64898	0.242534	1.62205	0.061728			3.09195	1.02607	4.71572	1.13279	7.98676	1.44142	637	4	4	4	3	4	3		1.75839	1.01295	2.17157	1.06433	2.82609	1.20059
Quad	0.369056	1.56815	0.424667	0.040071	0.00469827	1.66895	0.404369	1.59975	0.164513	0.422258	0.0304101	0.00375523	1.61634	0.272997	1.58482	0.0748053	0.422983	0.0237508	0.00347222	1.59559	0.217708	1.57533	0.0474483			3.14569	0.847695	4.77134	0.882821	9.27805	1.10798	637	5	1	5	1	6	2		1.77361	0.920703	2.18434	0.939586	3.04599	1.0526
Square	0.369056	1.56815	0.378407	0.0384005	0.00156204	1.74076	0.454353	1.65936	0.214756	0.379282	0.0277602	0.0008752	1.69174	0.289103	1.65408	0.0909645	0.379622	0.0196108	0.000496224	1.67081	0.200391	1.65275	0.0473137			1.04585	1.10659	1.11202	1.07353	1.32595	1.10483	637	1	5	1	2	1	1		1.02267	1.05194	1.05452	1.03611	1.1515	1.05111
OldEPI	0.369056	1.56815	0.424063	0.0481405	0.00534328	1.65183	0.440914	1.57146	0.194416	0.423175	0.0438134	0.00484848	1.61789	0.345411	1.56669	0.119311	0.422111	0.0407322	0.00447395	1.6255	0.301872	1.58671	0.0914712			3.57755	1.00178	6.16041	1.40806	11.9547	2.13596	637	7	3	8	4	8	4		1.89144	1.00089	2.48202	1.18662	3.45756	1.46149
EPI3	0.369056	1.56815	0.423862	0.0484909	0.00535506	1.62586	0.410093	1.55636	0.168315	0.4197	0.0434915	0.00445633	1.63544	0.351988	1.58549	0.124196	0.414445	0.0380221	0.00350584	1.66108	0.310491	1.62478	0.0996116			3.58544	0.867288	5.66214	1.46571	9.36788	2.32605	637	8	2	7	5	7	6		1.89353	0.931283	2.37953	1.21067	3.0607	1.52514
EPI5	0.369056	1.56815	0.422787	0.0479922	0.00519027	1.67335	0.473878	1.5888	0.224987	0.41829	0.0419323	0.0041823	1.66547	0.37082	1.61179	0.139412	0.411821	0.0371725	0.00321064	1.68501	0.297127	1.65171	0.0952667			3.4751	1.1593	5.31398	1.64528	8.57908	2.22459	637	6	6	6	6	5	5		1.86416	1.07671	2.30521	1.28269	2.92901	1.49151
			population 46
	true	true	7							15							30
	mean	rr	mean	stdev	mse	mrr	srr	prr	mse_rr	mean	stdev	mse	mrr	srr	prr	mse_rr	mean	stdev	mse	mrr	srr	prr	mse_rr
Random	0.247077	1.5143	0.242065	0.031339	0.00100725	1.57104	0.399161	1.51935	0.159355	0.24373	0.0232112	0.000549962	1.52056	0.253428	1.49855	0.0644738	0.242089	0.0161329	0.00028515	1.51603	0.175516	1.50478	0.0308965
NewEPI	0.247077	1.5143	0.243556	0.044981	0.00203569	1.56159	0.432317	1.5028	0.18703	0.247977	0.042681	0.00182248	1.564	0.321491	1.53243	0.103685	0.245944	0.0369621	0.00136748	1.54887	0.283284	1.52381	0.0803403			2.02103	1.17367	3.31382	1.60817	4.79564	2.6003	650	7	6	8	6	7	8		1.42163	1.08336	1.82039	1.26814	2.1899	1.61255
Grid	0.247077	1.5143	0.252432	0.0459953	0.00214424	1.59573	0.439699	1.53351	0.193704	0.252474	0.0417971	0.00177613	1.55702	0.33894	1.51976	0.11491	0.251928	0.0389914	0.00154386	1.534	0.274254	1.50966	0.0752368			2.1288	1.21555	3.22954	1.78228	5.4142	2.43512	650	8	7	7	8	8	7		1.45904	1.10252	1.79709	1.33502	2.32684	1.56049
Peri	0.247077	1.5143	0.244283	0.0357935	0.00128898	1.41884	0.361817	1.37592	0.150061	0.245323	0.0336073	0.00113253	1.36091	0.254377	1.34023	0.095008	0.248134	0.0313398	0.0009833	1.40738	0.200716	1.39514	0.054486			1.2797	0.941675	2.05928	1.47359	3.44836	1.7635	650	3	3	3	5	3	3		1.13124	0.970399	1.43502	1.21392	1.85697	1.32797
Quad	0.247077	1.5143	0.236254	0.0324928	0.00117292	1.56767	0.386942	1.51479	0.149724	0.235371	0.0247461	0.0007494	1.53912	0.295137	1.50918	0.0871321	0.235668	0.0209529	0.000569189	1.52148	0.203201	1.50803	0.04133			1.16447	0.939565	1.36264	1.35143	1.9961	1.33769	650	2	2	2	2	2	2		1.07911	0.969311	1.16732	1.16251	1.41283	1.15659
Square	0.247077	1.5143	0.24753	0.0328003	0.00107606	1.57404	0.36821	1.52747	0.135752	0.24702	0.0224783	0.000505277	1.5306	0.261533	1.50682	0.0684555	0.246114	0.0165355	0.00027435	1.52755	0.17839	1.5173	0.031832			1.06832	0.851884	0.918749	1.06176	0.962124	1.03028	650	1	1	1	1	1	1		1.03359	0.922976	0.958514	1.03042	0.980879	1.01503
OldEPI	0.247077	1.5143	0.23577	0.0412884	0.00183258	1.57667	0.429255	1.51958	0.184288	0.236218	0.036663	0.00146209	1.5659	0.337265	1.53046	0.114009	0.236901	0.0335079	0.00122633	1.55746	0.260206	1.53685	0.0682157			1.81938	1.15646	2.65853	1.7683	4.30064	2.20788	650	6	5	6	7	6	6		1.34885	1.07539	1.6305	1.32977	2.0738	1.48589
EPI3	0.247077	1.5143	0.237539	0.0408671	0.00176109	1.60115	0.470998	1.52972	0.222077	0.238452	0.0361499	0.00138121	1.56237	0.307695	1.53246	0.095006	0.238389	0.0330241	0.00116607	1.55825	0.251046	1.53851	0.0636102			1.74841	1.3936	2.51146	1.47356	4.08932	2.05882	650	5	8	5	4	5	4		1.32228	1.18051	1.58476	1.2139	2.02221	1.43486
EPI5	0.247077	1.5143	0.238366	0.0407144	0.00173354	1.56529	0.416552	1.51246	0.173519	0.239471	0.0357808	0.00133812	1.55441	0.302258	1.52599	0.0914966	0.240237	0.0318157	0.00105902	1.56466	0.252565	1.54566	0.0647725			1.72106	1.08888	2.43311	1.41913	3.71391	2.09644	650	4	4	4	3	4	5		1.31189	1.0435	1.55984	1.19127	1.92715	1.44791
			population 47
	true	true	7							15							30
	mean	rr	mean	stdev	mse	mrr	srr	prr	mse_rr	mean	stdev	mse	mrr	srr	prr	mse_rr	mean	stdev	mse	mrr	srr	prr	mse_rr
Random	0.203573	1.96818	0.210924	0.0328454	0.00113286	2.20816	0.688252	2.14299	0.504249	0.210381	0.0240465	0.000624583	2.14556	0.43537	2.11928	0.212378	0.211556	0.0160281	0.000320628	2.12332	0.312552	2.10901	0.117522
NewEPI	0.203573	1.96818	0.210965	0.0387273	0.00155445	2.10371	0.727914	2.03259	0.534007	0.20987	0.0355082	0.00130048	2.05778	0.600271	2.00718	0.361846	0.212436	0.0344166	0.00126305	2.06222	0.503908	2.02057	0.256668			1.37215	1.05901	2.08216	1.70378	3.93931	2.184	663	3	7	4	8	7	8		1.17139	1.02908	1.44297	1.30529	1.98477	1.47784
Grid	0.203573	1.96818	0.209316	0.0433498	0.00191219	1.99455	0.730593	1.93562	0.534826	0.208411	0.0393101	0.00156869	1.954	0.592942	1.90827	0.355169	0.207664	0.0352695	0.00126067	1.91191	0.490706	1.88107	0.248381			1.68793	1.06064	2.51158	1.67234	3.93189	2.11348	663	5	8	6	7	6	7		1.2992	1.02987	1.5848	1.29319	1.9829	1.45378
Peri	0.203573	1.96818	0.220734	0.0352009	0.0015336	2.04658	0.604061	1.99605	0.365666	0.22333	0.0285942	0.00120797	2.00681	0.466455	1.97824	0.217681	0.226051	0.0252291	0.00114177	1.9379	0.352759	1.91959	0.1268			1.35375	0.72517	1.93404	1.02497	3.56103	1.07895	663	2	1	2	3	5	3		1.16351	0.851569	1.3907	1.01241	1.88707	1.03872
Quad	0.203573	1.96818	0.227672	0.0339503	0.00173338	2.02616	0.63686	1.96027	0.405653	0.227561	0.0259453	0.00124858	1.99286	0.446014	1.96812	0.198928	0.228139	0.0226244	0.00111535	1.96519	0.341753	1.95228	0.117048			1.5301	0.80447	1.99907	0.936671	3.47865	0.995967	663	4	3	3	2	4	2		1.23697	0.896922	1.41388	0.967818	1.86511	0.997982
Square	0.203573	1.96818	0.210554	0.0322218	0.00108698	2.12328	0.623079	2.07055	0.398707	0.210909	0.0238929	0.000624687	2.10992	0.425654	2.08424	0.194651	0.211107	0.0173404	0.00035745	2.09303	0.314167	2.07824	0.110814			0.959502	0.790694	1.00017	0.916531	1.11484	0.942924	663	1	2	1	1	1	1		0.979542	0.88921	1.00008	0.957356	1.05586	0.971042
OldEPI	0.203573	1.96818	0.22825	0.0442236	0.00256468	1.98667	0.686224	1.92029	0.473197	0.228188	0.0387141	0.00210468	1.93402	0.539246	1.89192	0.296602	0.22616	0.0348672	0.00172589	1.93094	0.453732	1.89576	0.211117			2.2639	0.938418	3.36974	1.39657	5.38285	1.79641	663	8	6	8	6	8	6		1.50463	0.96872	1.83568	1.18177	2.3201	1.3403
EPI3	0.203573	1.96818	0.22617	0.0407843	0.00217398	1.94719	0.649325	1.89714	0.42667	0.223714	0.0355597	0.00167015	1.94017	0.508304	1.9047	0.262403	0.217291	0.0302106	0.00110086	1.91426	0.411415	1.88742	0.175784			1.91903	0.846148	2.67403	1.23554	3.43346	1.49576	663	7	4	7	4	3	4		1.38529	0.919863	1.63525	1.11155	1.85296	1.22301
EPI5	0.203573	1.96818	0.222685	0.0409718	0.00204396	1.94936	0.668558	1.89292	0.452634	0.218548	0.0335058	0.00134689	1.92707	0.519246	1.89167	0.27547	0.212505	0.0278773	0.000856924	1.88741	0.410975	1.85744	0.181164			1.80425	0.897639	2.15646	1.29707	2.67264	1.54153	663	6	5	5	5	2	5		1.34322	0.947438	1.46849	1.13889	1.63482	1.24158
			population 48
	true	true	7							15							30
	mean	rr	mean	stdev	mse	mrr	srr	prr	mse_rr	mean	stdev	mse	mrr	srr	prr	mse_rr	mean	stdev	mse	mrr	srr	prr	mse_rr
Random	0.270489	1.56821	0.273596	0.0297943	0.000897354	1.73307	0.694588	1.55715	0.482575	0.275291	0.0204565	0.000441527	1.64173	0.395341	1.57056	0.1563	0.27501	0.0142547	0.000223636	1.59284	0.249218	1.56191	0.0621493
NewEPI	0.270489	1.56821	0.275966	0.0308743	0.00098322	1.70238	0.694261	1.53981	0.482805	0.267271	0.0225166	0.000517353	1.66356	0.395585	1.59012	0.156968	0.266555	0.017518	0.000322357	1.64453	0.287669	1.60071	0.0838097			1.09569	1.00048	1.17173	1.00427	1.44144	1.34852	676	4	4	4	5	6	8		1.04675	1.00024	1.08247	1.00213	1.2006	1.16126
Grid	0.270489	1.56821	0.272023	0.0317364	0.00100955	1.7496	0.840622	1.57684	0.70672	0.272008	0.0236525	0.000561748	1.62198	0.407838	1.55511	0.166503	0.272277	0.0178746	0.000322698	1.59227	0.260819	1.56172	0.0680687			1.12503	1.46448	1.27228	1.06528	1.44296	1.09524	676	6	7	7	8	7	7		1.06068	1.21016	1.12796	1.03212	1.20123	1.04654
Peri	0.270489	1.56821	0.275433	0.0291618	0.000874854	1.69139	0.654928	1.55564	0.429089	0.272754	0.0209709	0.000444909	1.67416	0.400927	1.60184	0.161873	0.274087	0.0164769	0.000284434	1.58533	0.24184	1.55603	0.0586349			0.974926	0.889165	1.00766	1.03566	1.27186	0.943453	676	1	2	1	7	4	2		0.987383	0.942956	1.00382	1.01767	1.12777	0.971315
Quad	0.270489	1.56821	0.276076	0.0318499	0.00104563	1.70129	0.68971	1.5397	0.476513	0.277231	0.0226277	0.000557467	1.6316	0.376567	1.5608	0.141858	0.276441	0.0169953	0.000324266	1.61209	0.249552	1.58039	0.0624246			1.16524	0.987438	1.26259	0.907598	1.44998	1.00443	676	7	3	6	3	8	5		1.07946	0.993699	1.12365	0.952679	1.20415	1.00221
Square	0.270489	1.56821	0.277855	0.0301209	0.000961527	1.73178	0.706442	1.56245	0.499093	0.27696	0.0206089	0.000466601	1.65655	0.398847	1.58547	0.159377	0.277501	0.0148584	0.00026994	1.60268	0.247506	1.57165	0.0612711			1.07151	1.03423	1.05679	1.01969	1.20705	0.985869	676	3	5	2	6	1	4		1.03514	1.01697	1.028	1.00979	1.09866	0.992909
OldEPI	0.270489	1.56821	0.276884	0.0317654	0.00104994	1.77738	0.81643	1.60651	0.668025	0.277537	0.0228107	0.000570002	1.63053	0.375637	1.56673	0.141105	0.275719	0.0166593	0.000304885	1.60959	0.256226	1.57914	0.0657712			1.17004	1.38429	1.29098	0.902785	1.36331	1.05828	676	8	6	8	2	5	6		1.08168	1.17656	1.13621	0.95015	1.16761	1.02873
EPI3	0.270489	1.56821	0.277716	0.0307646	0.00099869	1.71526	0.653615	1.56595	0.427218	0.275819	0.0223812	0.000529327	1.62965	0.355373	1.57139	0.1263	0.273804	0.0164065	0.000280162	1.59735	0.23654	1.57016	0.055955			1.11293	0.885288	1.19885	0.808062	1.25276	0.900332	676	5	1	5	1	3	1		1.05495	0.940897	1.09492	0.898923	1.11927	0.948858
EPI5	0.270489	1.56821	0.276856	0.0303061	0.000958998	1.75893	0.841768	1.59308	0.709192	0.273871	0.0223455	0.000510759	1.65114	0.382961	1.5865	0.146994	0.271969	0.0166211	0.000278451	1.61577	0.243532	1.58416	0.0595622			1.0687	1.4696	1.1568	0.940458	1.24511	0.958373	676	2	8	3	4	2	3		1.03378	1.21227	1.07555	0.969772	1.11585	0.978965
			population 49
	true	true	7							15							30
	mean	rr	mean	stdev	mse	mrr	srr	prr	mse_rr	mean	stdev	mse	mrr	srr	prr	mse_rr	mean	stdev	mse	mrr	srr	prr	mse_rr
Random	0.0636581	1.23812	0.0637999	0.0207804	0.000431845	1.63274	1.46824	1.20035	2.15716	0.0631965	0.0144851	0.000210031	1.38305	0.749504	1.19789	0.563375	0.0632055	0.00974829	9.52339e-05	1.31886	0.4644	1.23021	0.21573
NewEPI	0.0636581	1.23812	0.0629336	0.0246793	0.000609593	1.74067	1.71815	1.19467	2.95393	0.0631766	0.0220746	0.00048752	1.51258	1.43602	1.14485	2.07085	0.061908	0.0195539	0.000385418	1.44079	0.877449	1.20633	0.770927			1.4116	1.36936	2.32118	3.6758	4.04707	3.57358	689	3	5	4	5	5	5		1.18811	1.1702	1.52354	1.91724	2.01173	1.89039
Grid	0.0636581	1.23812	0.0642832	0.0275169	0.00075757	1.79537	1.81306	1.18713	3.28979	0.0642256	0.024777	0.000614222	1.63137	1.46624	1.1774	2.15355	0.0644003	0.0233233	0.000544527	1.47388	0.988776	1.17893	0.981181			1.75426	1.52506	2.92443	3.82258	5.71779	4.54819	689	8	8	8	6	8	8		1.32449	1.23493	1.7101	1.95514	2.39119	2.13265
Peri	0.0636581	1.23812	0.0476416	0.0191853	0.000624604	1.21735	1.12927	0.882516	1.4017	0.0481284	0.0160035	0.000497284	1.16539	0.977323	0.874884	1.0871	0.0501068	0.0140408	0.000380782	1.15623	0.64504	0.966314	0.489955			1.44636	0.649793	2.36767	1.92962	3.99838	2.27115	689	5	1	5	2	4	3		1.20265	0.806098	1.53872	1.38911	1.9996	1.50703
Quad	0.0636581	1.23812	0.0632285	0.0210937	0.000445129	1.79512	1.5785	1.29967	2.49545	0.0631097	0.0160212	0.00025698	1.6477	1.06933	1.34298	1.15446	0.0637754	0.0137716	0.000189671	1.44627	0.678261	1.27316	0.461266			1.03076	1.15682	1.22353	2.04919	1.99163	2.13816	689	2	4	2	3	2	2		1.01526	1.07556	1.10613	1.4315	1.41125	1.46225
Square	0.0636581	1.23812	0.0627454	0.0204308	0.000418251	1.58717	1.39043	1.17905	1.93678	0.0619275	0.0138179	0.000193929	1.38644	0.861218	1.1812	0.744936	0.0623243	0.0101535	0.000104873	1.25221	0.431076	1.17057	0.19039			0.96852	0.897842	0.923336	1.32228	1.10121	0.882536	689	1	2	1	1	1	1		0.984134	0.947545	0.960904	1.1499	1.04939	0.939434
OldEPI	0.0636581	1.23812	0.0632106	0.0263798	0.000696094	1.85768	1.76859	1.24108	3.12792	0.063465	0.0243165	0.000591329	1.73724	1.48229	1.26969	2.19818	0.0631652	0.0219344	0.000481361	1.53434	0.970965	1.27329	0.94401			1.61191	1.45002	2.81544	3.90181	5.05451	4.37589	689	7	6	7	8	7	7		1.26961	1.20417	1.67793	1.9753	2.24822	2.09186
EPI3	0.0636581	1.23812	0.0634784	0.0257815	0.000664718	1.84386	1.78646	1.28416	3.19356	0.0627215	0.022303	0.000498301	1.72143	1.47222	1.30543	2.17196	0.0626481	0.0203536	0.000415289	1.50859	0.885453	1.31617	0.790119			1.53925	1.48045	2.37251	3.85527	4.36073	3.66254	689	6	7	6	7	6	6		1.24067	1.21674	1.5403	1.96348	2.08824	1.91378
EPI5	0.0636581	1.23812	0.063604	0.0249827	0.000624138	1.80786	1.51695	1.30671	2.30584	0.0628527	0.0214365	0.000460172	1.6161	1.2827	1.29832	1.64894	0.0626591	0.0188106	0.000354837	1.47972	0.753789	1.32931	0.576513			1.44528	1.06893	2.19097	2.9269	3.72595	2.67239	689	4	3	3	4	3	4		1.2022	1.03389	1.48019	1.71082	1.93027	1.63474
			population 50
	true	true	7							15							30
	mean	rr	mean	stdev	mse	mrr	srr	prr	mse_rr	mean	stdev	mse	mrr	srr	prr	mse_rr	mean	stdev	mse	mrr	srr	prr	mse_rr
Random	0.395943	1.64873	0.390501	0.0341013	0.00119251	1.67239	0.374309	1.61484	0.141256	0.391465	0.0231114	0.000554189	1.63357	0.237996	1.60814	0.0582896	0.390359	0.0169253	0.000317647	1.61585	0.163924	1.60263	0.0289963
NewEPI	0.395943	1.64873	0.391981	0.0383697	0.00148793	1.64439	0.372957	1.58563	0.143079	0.391814	0.0295604	0.000890866	1.6341	0.266221	1.60191	0.0730657	0.389107	0.0267797	0.000763883	1.6446	0.251402	1.61378	0.0644245			1.24773	1.0129	1.60751	1.25349	2.40482	2.22182	702	7	2	5	2	6	8		1.11702	1.00643	1.26788	1.1196	1.55075	1.49058
Grid	0.395943	1.64873	0.387875	0.0373764	0.00146209	1.71114	0.468176	1.62349	0.219826	0.387739	0.0302341	0.000981406	1.66268	0.317549	1.6146	0.102002	0.385955	0.0261643	0.000784331	1.66958	0.248277	1.63749	0.0617678			1.22606	1.55623	1.77089	1.74992	2.46919	2.1302	702	6	8	7	7	7	7		1.10727	1.24749	1.33075	1.32285	1.57137	1.45952
Peri	0.395943	1.64873	0.371447	0.0353717	0.00185121	1.59266	0.412892	1.51503	0.188355	0.373199	0.0269069	0.00124127	1.58635	0.262668	1.54969	0.0788034	0.378867	0.0222145	0.000785074	1.62534	0.204005	1.60256	0.0437497			1.55236	1.33344	2.2398	1.35193	2.47153	1.5088	702	8	7	8	3	8	3		1.24594	1.15474	1.49659	1.16272	1.57211	1.22833
Quad	0.395943	1.64873	0.38962	0.0355606	0.00130454	1.5991	0.385751	1.52886	0.163173	0.38877	0.0245667	0.000654975	1.58258	0.260148	1.54281	0.078896	0.388527	0.0187934	0.000408189	1.57445	0.183947	1.55321	0.0429606			1.09394	1.15516	1.18186	1.35352	1.28504	1.48159	702	2	3	1	4	2	2		1.04592	1.07478	1.08713	1.16341	1.1336	1.21721
Square	0.395943	1.64873	0.386172	0.0337551	0.00123488	1.64853	0.358862	1.59117	0.132095	0.385809	0.0236864	0.000663743	1.62761	0.230948	1.60314	0.0554154	0.386238	0.017085	0.000386084	1.60693	0.155493	1.59571	0.0269892			1.03553	0.935148	1.19768	0.950691	1.21545	0.930781	702	1	1	2	1	1	1		1.01761	0.967031	1.09439	0.975034	1.10248	0.96477
OldEPI	0.395943	1.64873	0.386678	0.0369957	0.00145452	1.62149	0.408618	1.5473	0.177257	0.387062	0.0278887	0.000856652	1.61408	0.282547	1.57289	0.0855845	0.385559	0.0237093	0.000669958	1.62	0.224068	1.59217	0.0534055			1.21971	1.25486	1.54577	1.46826	2.10913	1.8418	702	5	4	4	5	5	5		1.10441	1.12021	1.24329	1.21172	1.45228	1.35713
EPI3	0.395943	1.64873	0.387235	0.0352989	0.00132184	1.65856	0.426637	1.57884	0.186904	0.384555	0.0278044	0.000902771	1.65135	0.317158	1.60132	0.102837	0.384165	0.0227212	0.000654974	1.64359	0.229976	1.61535	0.0540032			1.10845	1.32316	1.62899	1.76424	2.06196	1.86242	702	3	6	6	8	4	6		1.05283	1.15029	1.27632	1.32825	1.43595	1.3647
EPI5	0.395943	1.64873	0.387766	0.0358256	0.00135034	1.68406	0.427679	1.60425	0.184888	0.386856	0.0277792	0.000854257	1.65	0.299256	1.60604	0.0913766	0.3857	0.0231418	0.000640462	1.66315	0.222949	1.63705	0.0498427			1.13234	1.30889	1.54145	1.56763	2.01627	1.71893	702	4	5	3	6	3	4		1.06412	1.14407	1.24155	1.25205	1.41995	1.31108
			population vanilla 1
	true	true	7							15							30
	mean	rr	mean	stdev	mse	mrr	srr	prr	mse_rr	mean	stdev	mse	mrr	srr	prr	mse_rr	mean	stdev	mse	mrr	srr	prr	mse_rr
Random	0.624483	1.50384	0.625413	0.0322401	0.00104029	1.53205	0.166005	1.51858	0.0277749	0.625039	0.0221725	0.000491929	1.52102	0.115695	1.51427	0.0134941	0.622928	0.0160335	0.000259491	1.52631	0.0816271	1.5229	0.00702627
NewEPI	0.624483	1.50384	0.62495	0.0317291	0.00100695	1.53314	0.16075	1.51986	0.0260972	0.624034	0.0228056	0.000520297	1.52836	0.118135	1.52147	0.0142667	0.62439	0.0158611	0.000251583	1.51868	0.0819083	1.51532	0.00684076			0.967956	0.939596	1.05767	1.05725	0.969525	0.973598	715	4	2	6	8	4	5		0.983847	0.969327	1.02843	1.02823	0.984644	0.986711
Grid	0.624483	1.50384	0.623803	0.0313074	0.000980616	1.52628	0.161981	1.51367	0.0263345	0.625125	0.0226579	0.000513792	1.51125	0.109718	1.50538	0.0120404	0.624477	0.016825	0.000283081	1.5134	0.0819335	1.51001	0.00675117			0.942638	0.948138	1.04444	0.892271	1.09091	0.960847	715	1	3	5	1	8	3		0.970895	0.973724	1.02198	0.944601	1.04446	0.980228
Peri	0.624483	1.50384	0.62871	0.0321445	0.00105114	1.47334	0.1523	1.46203	0.0249434	0.621633	0.0209248	0.00044597	1.47674	0.107125	1.47121	0.0125405	0.620837	0.0150427	0.000239576	1.48439	0.0796483	1.48126	0.00685371			1.01043	0.898053	0.906574	0.92933	0.923254	0.975441	715	7	1	1	3	3	6		1.0052	0.947657	0.952142	0.964017	0.960861	0.987644
Quad	0.624483	1.50384	0.626752	0.0329304	0.00108956	1.51459	0.1676	1.50073	0.0280994	0.624753	0.0230725	0.000532413	1.50989	0.111411	1.50351	0.0124125	0.625517	0.0153601	0.000237002	1.50982	0.0806319	1.50663	0.00650929			1.04736	1.01168	1.0823	0.919847	0.913333	0.926422	715	8	4	7	2	2	2		1.02341	1.00582	1.04034	0.959086	0.955684	0.962508
Square	0.624483	1.50384	0.625219	0.0323806	0.00104904	1.52311	0.171086	1.50923	0.0292995	0.625873	0.0220403	0.000487707	1.51323	0.112753	1.50693	0.0127228	0.624587	0.0161521	0.000260901	1.51359	0.0820237	1.51023	0.00676872			1.00842	1.05489	0.991418	0.942839	1.00543	0.963345	715	6	6	2	4	6	4		1.0042	1.02708	0.9957	0.970999	1.00271	0.981501
OldEPI	0.624483	1.50384	0.623814	0.032153	0.00103426	1.52433	0.169181	1.51003	0.0286605	0.623558	0.023199	0.000539049	1.52205	0.117772	1.51508	0.0139966	0.622957	0.0163005	0.000268035	1.52299	0.0823434	1.51959	0.0070285			0.994207	1.03188	1.09579	1.03724	1.03293	1.00032	715	5	5	8	6	7	7		0.997099	1.01582	1.0468	1.01845	1.01633	1.00016
EPI3	0.624483	1.50384	0.62259	0.0314016	0.000989644	1.53858	0.17147	1.52479	0.0298409	0.623197	0.0220831	0.000489317	1.52578	0.11847	1.51902	0.0142656	0.623382	0.0158861	0.00025358	1.51409	0.0838522	1.51065	0.00707757			0.951316	1.07438	0.994691	1.05717	0.977222	1.0073	715	2	8	3	7	5	8		0.975354	1.03652	0.997342	1.02819	0.988545	1.00364
EPI5	0.624483	1.50384	0.623144	0.0316724	0.00100493	1.53083	0.171465	1.51692	0.0295713	0.624416	0.0221631	0.000491207	1.51944	0.113638	1.51309	0.0129992	0.624363	0.0153244	0.000234852	1.51317	0.079746	1.51007	0.00639824			0.966014	1.06468	0.998534	0.96332	0.905047	0.910617	715	3	7	4	5	1	1		0.98286	1.03183	0.999266	0.981489	0.951339	0.954262
			population vanilla 2
	true	true	7							15							30
	mean	rr	mean	stdev	mse	mrr	srr	prr	mse_rr	mean	stdev	mse	mrr	srr	prr	mse_rr	mean	stdev	mse	mrr	srr	prr	mse_rr
Random	0.119081	1.50006	0.117876	0.02142	0.000460268	1.65553	0.753049	1.49869	0.567085	0.11941	0.0143089	0.000204853	1.56055	0.43097	1.49312	0.185783	0.119309	0.0109035	0.000118938	1.52483	0.281926	1.49358	0.0795243
NewEPI	0.119081	1.50006	0.119128	0.0209638	0.000439483	1.62734	0.727875	1.48042	0.530188	0.118271	0.0145963	0.000213708	1.57379	0.432868	1.50648	0.187416	0.12006	0.0106575	0.000114541	1.51557	0.279172	1.48497	0.0781647			0.954841	0.934936	1.04323	1.00879	0.963027	0.982904	728	3	5	2	7	5	3		0.97716	0.966921	1.02138	1.00438	0.981339	0.991415
Grid	0.119081	1.50006	0.118603	0.0219254	0.000480951	1.68315	0.728191	1.53099	0.531219	0.11869	0.0146157	0.000213771	1.58138	0.421411	1.51607	0.177844	0.118417	0.0105702	0.00011217	1.54121	0.290208	1.50768	0.0842787			1.04494	0.936754	1.04354	0.957263	0.943094	1.05979	728	7	6	3	4	3	6		1.02222	0.96786	1.02154	0.978398	0.97113	1.02946
Peri	0.119081	1.50006	0.129223	0.0210075	0.000544175	1.52824	0.544859	1.43141	0.301584	0.119954	0.014636	0.000214974	1.55511	0.42295	1.48972	0.178994	0.118214	0.0103644	0.000108172	1.54525	0.279613	1.51566	0.0784268			1.1823	0.531815	1.04941	0.963454	0.909483	0.9862	728	8	1	4	6	1	4		1.08734	0.729256	1.02441	0.981557	0.953668	0.993076
Quad	0.119081	1.50006	0.119697	0.0214256	0.000459436	1.59825	0.635254	1.47441	0.404206	0.119927	0.0145852	0.000213444	1.54374	0.415606	1.48192	0.173057	0.118755	0.0108265	0.000117319	1.50464	0.291981	1.47219	0.0860296			0.998191	0.712778	1.04194	0.931501	0.986389	1.0818	728	5	2	1	2	7	7		0.999095	0.844262	1.02075	0.965143	0.993171	1.0401
Square	0.119081	1.50006	0.118518	0.0209601	0.000439643	1.63949	0.737205	1.48968	0.543579	0.11986	0.0151908	0.000231367	1.557	0.415295	1.49467	0.172499	0.118768	0.0106008	0.000112475	1.5336	0.285351	1.50269	0.0814321			0.955187	0.95855	1.12943	0.928496	0.945657	1.02399	728	4	7	8	1	4	5		0.977337	0.979056	1.06275	0.963585	0.972449	1.01192
OldEPI	0.119081	1.50006	0.118654	0.0203583	0.000414643	1.60253	0.673679	1.4624	0.455262	0.118183	0.0147233	0.000217582	1.56943	0.446983	1.49846	0.199796	0.118053	0.010446	0.000110176	1.53118	0.298706	1.49779	0.0892304			0.900871	0.802811	1.06214	1.07543	0.926326	1.12205	728	1	4	5	8	2	8		0.949142	0.895997	1.0306	1.03703	0.962459	1.05927
EPI3	0.119081	1.50006	0.117614	0.0218437	0.000479299	1.67209	0.743772	1.51702	0.553484	0.117567	0.0148702	0.000223415	1.57081	0.418795	1.50685	0.175435	0.117025	0.0106038	0.000116668	1.51705	0.275621	1.4875	0.0761247			1.04135	0.976017	1.09061	0.944301	0.980909	0.957251	728	6	8	6	3	6	1		1.02046	0.987936	1.04432	0.971752	0.990409	0.978392
EPI5	0.119081	1.50006	0.117669	0.0203667	0.000416796	1.62993	0.655591	1.49203	0.429864	0.11733	0.0149367	0.000226171	1.55468	0.422904	1.48826	0.178987	0.117643	0.0108898	0.000120655	1.52031	0.278111	1.49088	0.07743			0.90555	0.758024	1.10407	0.963418	1.01444	0.973665	728	2	3	7	5	8	2		0.951604	0.870646	1.05075	0.981539	1.00719	0.986745
			population vanilla 3
	true	true	7							15							30
	mean	rr	mean	stdev	mse	mrr	srr	prr	mse_rr	mean	stdev	mse	mrr	srr	prr	mse_rr	mean	stdev	mse	mrr	srr	prr	mse_rr
Random	0.257287	1.50665	0.256777	0.0288508	0.000832629	1.56091	0.353116	1.51326	0.124735	0.25647	0.0199893	0.000400239	1.55121	0.261633	1.52334	0.0687304	0.256395	0.0143964	0.000208052	1.55263	0.178761	1.53941	0.0330287
NewEPI	0.257287	1.50665	0.256734	0.029011	0.000841944	1.59418	0.381056	1.53858	0.146223	0.256508	0.0213554	0.00045666	1.5758	0.252515	1.55039	0.065677	0.257373	0.0140798	0.000198248	1.54328	0.182355	1.52907	0.033756			1.01119	1.17227	1.14097	0.955575	0.952878	1.02202	741	4	2	8	3	1	5		1.00558	1.08272	1.06816	0.977535	0.976155	1.01095
Grid	0.257287	1.50665	0.257611	0.029182	0.000851694	1.61116	0.402416	1.55176	0.163974	0.259122	0.0205922	0.000427406	1.56311	0.260314	1.53553	0.0685974	0.25829	0.0150188	0.00022657	1.53922	0.182827	1.52517	0.0337687			1.0229	1.31458	1.06788	0.998066	1.08901	1.0224	741	6	7	6	6	8	6		1.01138	1.14655	1.03338	0.999032	1.04356	1.01114
Peri	0.257287	1.50665	0.271777	0.0287806	0.00103828	1.46171	0.310761	1.42419	0.103372	0.258036	0.0201424	0.000406277	1.45156	0.237895	1.42791	0.062794	0.255404	0.0143368	0.000209089	1.49611	0.173487	1.48387	0.0306167			1.24699	0.828736	1.01509	0.913628	1.00499	0.926971	741	8	1	4	2	6	1		1.11669	0.910349	1.00751	0.955839	1.00249	0.962793
Quad	0.257287	1.50665	0.259328	0.0292881	0.000861958	1.59607	0.388227	1.53983	0.151821	0.259601	0.0198607	0.000399802	1.54206	0.259636	1.51528	0.0674853	0.258689	0.0143188	0.000206994	1.53198	0.181031	1.51808	0.0329029			1.03523	1.21715	0.998907	0.981885	0.994913	0.99619	741	7	4	3	5	4	4		1.01746	1.10325	0.999453	0.990901	0.997453	0.998093
Square	0.257287	1.50665	0.257986	0.0278878	0.000778218	1.56391	0.382613	1.51154	0.146417	0.259355	0.0207213	0.000433649	1.53285	0.246815	1.50912	0.0609237	0.258215	0.0143531	0.000206872	1.53414	0.180665	1.52107	0.0328478			0.934652	1.17383	1.08347	0.886416	0.994331	0.994522	741	3	3	7	1	3	3		0.966774	1.08343	1.0409	0.941497	0.997162	0.997257
OldEPI	0.257287	1.50665	0.258204	0.0278783	0.00077804	1.57273	0.390273	1.51466	0.152377	0.256937	0.0206265	0.000425575	1.56797	0.260794	1.54107	0.0691982	0.256721	0.0144463	0.000209016	1.554	0.180924	1.54047	0.0338773			0.934439	1.22161	1.0633	1.00681	1.00463	1.02569	741	2	5	5	7	5	7		0.966664	1.10527	1.03116	1.0034	1.00231	1.01276
EPI3	0.257287	1.50665	0.254945	0.0289489	0.000843524	1.60726	0.398584	1.54906	0.160668	0.255654	0.0198239	0.000395654	1.56703	0.25722	1.54039	0.0673005	0.256131	0.0144878	0.000211233	1.54856	0.178373	1.53574	0.0326632			1.01309	1.28808	0.988542	0.979196	1.01529	0.988932	741	5	6	2	4	7	2		1.00652	1.13493	0.994255	0.989543	1.00762	0.994451
EPI5	0.257287	1.50665	0.256502	0.0275799	0.000761267	1.61516	0.406612	1.5536	0.167538	0.256821	0.0192855	0.000372148	1.58166	0.263667	1.55454	0.0718137	0.257485	0.0142034	0.000201776	1.55454	0.182152	1.54149	0.0343932			0.914293	1.34315	0.929812	1.04486	0.969833	1.04131	741	1	8	1	8	2	8		0.956187	1.15894	0.964268	1.02218	0.984801	1.02045

## Sheet: RR=2
	Means of Ratios								Means of Ratios of Sqrts
	Prevalence			RR					Prevalence			RR
	n=7	n=15	n=30	n=7	n=15	n=30			n=7	n=15	n=30	n=7	n=15	n=30
NewEPI	1.49944	2.31657	3.63378	1.21794	1.72074	2.40107		enum	1.23216	1.53223	1.8172	1.09176	1.30991	1.4541
Grid	1.75036	2.76203	4.38197	1.59852	2.09141	2.77106		grid_epi	1.33137	1.67253	2.09658	1.23881	1.43824	1.64648
Peri	1.47589	2.21542	3.52905	1.07913	1.31717	1.66391		peri_epi	1.20249	1.4708	1.83405	0.993435	1.13754	1.27546
Quad	1.73955	2.61455	4.18091	1.01275	1.10489	1.34951		qtr_epi	1.28786	1.54548	1.91796	0.98083	1.03878	1.14334
Square	1.03621	1.11885	1.19532	0.988814	1.01345	1.00221		square_gps	1.01805	1.0558	1.08707	0.992366	1.00493	0.999666
OldEPI	2.23057	3.71343	6.02786	1.34062	1.7808	2.47595		strip_epi-s1	1.47336	1.88021	2.37765	1.13615	1.31508	1.54888
EPI3	2.12643	3.34996	5.15065	1.28833	1.58785	2.08868		strip_epi-s3	1.4392	1.78662	2.19089	1.11787	1.25701	1.42571
EPI5	2.08384	3.17934	4.64144	1.25476	1.4786	1.83793		strip_epi-s5	1.42609	1.74222	2.08137	1.1026	1.20778	1.34289
	Prevalence												RR
	n=7				n=15				n=30				n=7				n=15				n=30
	mean	min	max	stdev	mean	min	max	stdev	mean	min	max	stdev	mean	min	max	stdev	mean	min	max	stdev	mean	min	max	stdev
NewEPI	1.49944	0.915463	2.26583	0.307668	2.31657	0.941431	3.96808	0.722541	3.63378	0	14.7911	2.38564	1.21794	0.000258082	2.72037	0.385174	1.72074	0.787859	4.25304	0.650641	2.40107	0	15.2744	2.12512
Grid	1.75036	0.956286	2.83579	0.436871	2.76203	0.992972	5.51325	0.951027	4.38197	0.979282	9.54988	1.94259	1.59852	0.474951	5.80701	0.888073	2.09141	0.8137	5.34502	0.983852	2.77106	0.658512	7.6945	1.46176
Peri	1.47589	0.861901	4.09388	0.647795	2.21542	1.05652	6.36677	1.16924	3.52905	0.990421	12.1359	2.47367	1.07913	0.000213784	3.40842	0.571108	1.31717	0.451115	2.51902	0.462532	1.66391	0.439574	3.81842	0.768151
Quad	1.73955	0.819738	5.42674	1.09288	2.61455	0.86112	10.8728	2.23242	4.18091	0.914291	18.747	4.20893	1.01275	0.307292	2.94583	0.479654	1.10489	0.448852	2.2848	0.390471	1.34951	0.5388	4.44854	0.663173
Square	1.03621	0.813765	1.55064	0.12731	1.11885	0.672666	2.38125	0.248903	1.19532	0.573414	3.32911	0.409642	0.988814	0.649628	1.83204	0.211282	1.01345	0.681921	1.76701	0.18907	1.00221	0.828314	1.37445	0.111055
OldEPI	2.23057	0.987041	5.94769	1.23805	3.71343	0.982974	11.9236	2.58844	6.02786	1.02321	20.6288	4.65629	1.34062	0.414557	3.98378	0.674108	1.7808	0.634342	5.69671	0.959747	2.47595	0.671316	6.53016	1.3715
EPI3	2.12643	0.863049	5.51708	1.17289	3.34996	0.964707	10.8039	2.32265	5.15065	0.917063	19.0874	4.13244	1.28833	0.374514	3.15631	0.595705	1.58785	0.663626	3.10014	0.577721	2.08868	0.530913	5.84826	1.1302
EPI5	2.08384	0.920768	5.71069	1.14094	3.17934	1.00207	10.6976	2.18031	4.64144	0.913255	17.6104	3.63507	1.25476	0.462208	3.08511	0.578091	1.4786	0.689657	3.1841	0.577051	1.83793	0.737394	4.71574	0.87913
	Frequency of Rank for n=7 (1 is lowest ratio, 8 is highest ratio)
	Prevalence								RR
rank	1	2	3	4	5	6	7	8	1	2	3	4	5	6	7	8
NewEPI	1	13	11	9	5	7	6	1	4	4	7	4	6	9	10	9
Grid	0	0	8	14	4	1	2	24	0	1	2	4	4	7	9	26
Peri	7	13	17	7	1	2	3	3	11	11	8	7	8	1	4	3
Quad	4	15	9	5	16	2	2	0	20	9	8	5	5	4	1	1
Square	40	9	1	1	0	0	2	0	12	19	7	2	2	5	6	0
OldEPI	0	1	2	1	4	12	13	20	1	1	4	9	14	9	8	7
EPI3	1	0	3	7	8	18	14	2	2	5	9	10	4	9	9	5
EPI5	0	2	2	9	15	11	11	3	3	3	8	12	10	9	6	2
	Frequency of Rank for n=15 (1 is lowest ratio, 8 is highest ratio)
	Prevalence								RR
rank	1	2	3	4	5	6	7	8	1	2	3	4	5	6	7	8
NewEPI	1	13	9	4	7	11	5	3	1	3	5	6	9	8	10	11
Grid	0	0	7	12	4	4	9	17	0	0	2	2	5	1	19	24
Peri	1	15	13	11	4	3	2	4	5	12	14	8	2	6	3	3
Quad	4	16	13	5	9	2	4	0	13	25	6	3	2	2	1	1
Square	46	3	1	3	0	0	0	0	29	6	7	3	2	4	0	2
OldEPI	0	3	0	0	3	7	14	26	0	2	4	10	8	10	11	8
EPI3	1	1	3	6	13	12	14	3	4	1	4	9	16	8	8	3
EPI5	0	2	7	12	13	14	5	0	1	4	11	12	9	14	1	1
	Frequency of Rank for n=30 (1 is lowest ratio, 8 is highest ratio)
	Prevalence								RR
rank	1	2	3	4	5	6	7	8	1	2	3	4	5	6	7	8
NewEPI	4	11	6	4	7	6	8	7	4	3	2	7	4	9	10	14
Grid	0	0	6	10	4	4	13	16	1	0	1	0	5	2	18	26
Peri	0	12	20	7	7	2	2	3	1	8	19	15	9	1	0	0
Quad	2	19	9	2	11	6	4	0	11	28	5	5	3	0	0	1
Square	45	7	1	0	0	0	0	0	33	8	4	2	1	3	2	0
OldEPI	0	0	0	2	2	12	11	26	0	0	0	2	7	18	19	7
EPI3	1	1	0	9	14	14	13	1	3	1	2	12	17	13	1	4
EPI5	1	3	11	19	8	9	2	0	0	5	20	10	7	7	3	1
																																	6	10	13	17	20	24
			population 1
	true	true	7							15							30
	mean	rr	mean	stdev	mse	mrr	srr	prr	mse_rr	mean	stdev	mse	mrr	srr	prr	mse_rr	mean	stdev	mse	mrr	srr	prr	mse_rr
Random	0.410568	1.78869	0.424532	0.0397572	0.00177563	1.84401	0.468233	1.75406	0.220441	0.425083	0.0273361	0.000957947	1.81552	0.301752	1.77559	0.0912259	0.424334	0.019185	0.000557567	1.80229	0.206606	1.78262	0.0427229
NewEPI	0.410568	1.78869	0.426981	0.0449501	0.0022899	1.88962	0.508775	1.79422	0.258883	0.431274	0.038851	0.00193814	1.83668	0.36889	1.78267	0.136116	0.427832	0.0361215	0.00160281	1.82819	0.28435	1.79516	0.0808968			1.28963	1.17438	2.02322	1.49208	2.87465	1.89352	65	6	5	7	6	7	6		1.13562	1.08369	1.4224	1.22151	1.69548	1.37605
Grid	0.410568	1.78869	0.42825	0.0468943	0.00251173	1.84948	0.521471	1.74437	0.273896	0.426857	0.0432032	0.00213185	1.82437	0.411875	1.75126	0.171042	0.4286	0.0389466	0.00184199	1.75704	0.309618	1.71261	0.101651			1.41456	1.24249	2.22543	1.87493	3.30362	2.37932	65	8	6	8	7	8	8		1.18935	1.11467	1.49179	1.36928	1.81759	1.5425
Peri	0.410568	1.78869	0.424215	0.036663	0.00153042	1.90701	0.526929	1.80695	0.277988	0.423524	0.0308576	0.00112005	1.81237	0.340012	1.75881	0.116501	0.4203	0.0270476	0.000826284	1.78973	0.279845	1.7512	0.0797187			0.861901	1.26105	1.16922	1.27706	1.48195	1.86595	65	1	7	2	3	2	5		0.928386	1.12296	1.0813	1.13007	1.21735	1.366
Quad	0.410568	1.78869	0.433818	0.0366634	0.00188477	1.80803	0.428072	1.73323	0.186321	0.431156	0.0272924	0.00116874	1.78831	0.290402	1.74963	0.085859	0.429171	0.023544	0.000900392	1.77083	0.237867	1.74404	0.0585743			1.06147	0.84522	1.22005	0.941169	1.61486	1.37103	65	3	1	3	2	3	3		1.03027	0.919358	1.10456	0.970139	1.27077	1.17091
Square	0.410568	1.78869	0.42585	0.0382509	0.00169667	1.85302	0.447043	1.77385	0.200068	0.425328	0.0277655	0.000988781	1.79332	0.288944	1.75594	0.0845612	0.424546	0.0200164	0.000596041	1.80146	0.207813	1.78239	0.0432259			0.955533	0.907578	1.03219	0.926943	1.069	1.01177	65	2	2	1	1	1	1		0.977514	0.952669	1.01597	0.962779	1.03393	1.00587
OldEPI	0.410568	1.78869	0.429058	0.0435883	0.00224182	1.84968	0.533953	1.73688	0.28779	0.42798	0.0386216	0.00179481	1.8202	0.429968	1.73857	0.187384	0.430098	0.0342424	0.00155396	1.74028	0.296283	1.69826	0.0959612			1.26255	1.30552	1.87359	2.05407	2.78704	2.24613	65	5	8	6	8	6	7		1.12363	1.14259	1.36879	1.4332	1.66944	1.49871
EPI3	0.410568	1.78869	0.427529	0.0420247	0.00205375	1.81866	0.502172	1.71927	0.256996	0.4287	0.0368478	0.00168653	1.7692	0.342693	1.71572	0.122763	0.427077	0.0312995	0.00125221	1.7382	0.2438	1.7116	0.0653813			1.15663	1.16582	1.76057	1.3457	2.24584	1.53036	65	4	4	5	4	5	4		1.07547	1.07973	1.32686	1.16005	1.49861	1.23708
EPI5	0.410568	1.78869	0.431193	0.0432767	0.00229826	1.77719	0.476948	1.68628	0.237967	0.426129	0.0357684	0.00152152	1.75026	0.341021	1.70261	0.123705	0.423397	0.0301078	0.00107106	1.75438	0.229803	1.73282	0.0559309			1.29434	1.0795	1.58832	1.35603	1.92096	1.30915	65	7	3	4	5	4	2		1.13769	1.03899	1.26028	1.16449	1.38599	1.14418
			population 2
	true	true	7							15							30
	mean	rr	mean	stdev	mse	mrr	srr	prr	mse_rr	mean	stdev	mse	mrr	srr	prr	mse_rr	mean	stdev	mse	mrr	srr	prr	mse_rr
Random	0.535514	1.99338	0.533684	0.0355679	0.00126842	2.04741	0.339187	2.00385	0.115157	0.535487	0.0245405	0.000602237	2.01942	0.22272	2.00014	0.0496499	0.533696	0.0180105	0.000327683	1.99843	0.158315	1.98844	0.025088
NewEPI	0.535514	1.99338	0.534572	0.0420252	0.001767	2.03908	0.35277	1.99324	0.124447	0.533482	0.0372936	0.00139494	2.0259	0.281373	1.99524	0.0791742	0.531496	0.0325779	0.00107746	2.02246	0.228664	2.00363	0.0523923			1.39307	1.08067	2.31627	1.59465	3.28813	2.08834	78	4	6	5	7	6	6		1.18028	1.03955	1.52193	1.26279	1.81332	1.44511
Grid	0.535514	1.99338	0.526604	0.0443627	0.00204744	1.92699	0.362147	1.87674	0.144755	0.527367	0.0377948	0.00149482	1.9008	0.273757	1.8702	0.0901162	0.52578	0.0343777	0.00127658	1.89372	0.230029	1.87205	0.0676343			1.61416	1.25702	2.48211	1.81503	3.89577	2.69588	78	5	8	7	8	8	8		1.2705	1.12117	1.57547	1.34723	1.97377	1.64191
Peri	0.535514	1.99338	0.535663	0.040987	0.00167996	2.01587	0.336567	1.97263	0.113708	0.529623	0.0330705	0.00112836	1.91826	0.238839	1.89552	0.0666206	0.527405	0.0289663	0.000904802	1.88702	0.184164	1.87337	0.0483188			1.32444	0.987413	1.87362	1.34181	2.76121	1.92597	78	2	4	2	4	3	5		1.15084	0.993686	1.3688	1.15836	1.66169	1.38779
Quad	0.535514	1.99338	0.556444	0.0353805	0.00168984	1.93423	0.309861	1.89478	0.105736	0.557937	0.0278289	0.00127724	1.90423	0.212772	1.88378	0.0572841	0.553234	0.0222918	0.000810923	1.90788	0.159701	1.8966	0.0348708			1.33224	0.918185	2.12082	1.15376	2.47472	1.38994	78	3	1	3	2	2	2		1.15423	0.95822	1.45631	1.07413	1.57312	1.17896
Square	0.535514	1.99338	0.520614	0.0357721	0.00150165	1.9722	0.323099	1.93079	0.10831	0.522444	0.025569	0.000824599	1.95778	0.212782	1.94025	0.048099	0.521713	0.0180798	0.000517347	1.93026	0.153281	1.9206	0.028792			1.18387	0.940543	1.36923	0.968763	1.5788	1.14764	78	1	2	1	1	1	1		1.08806	0.969816	1.17014	0.984258	1.2565	1.07128
OldEPI	0.535514	1.99338	0.554695	0.0410524	0.00205321	1.94093	0.349245	1.89065	0.132526	0.554741	0.0345595	0.00156404	1.91331	0.250792	1.88601	0.0744249	0.552851	0.0311462	0.00127066	1.91576	0.208729	1.89672	0.052911			1.61871	1.15082	2.59705	1.49899	3.8777	2.10901	78	6	7	8	6	7	7		1.27229	1.07276	1.61154	1.22433	1.96919	1.45224
EPI3	0.535514	1.99338	0.556733	0.0406943	0.00210627	1.94114	0.319819	1.89772	0.111435	0.552016	0.0339266	0.00142333	1.93795	0.248275	1.91138	0.0683645	0.548033	0.0296579	0.00103632	1.94761	0.195695	1.93162	0.0421108			1.66054	0.967675	2.36341	1.37693	3.16256	1.67852	78	8	3	6	5	5	4		1.28862	0.983705	1.53734	1.17343	1.77836	1.29558
EPI5	0.535514	1.99338	0.552836	0.0422327	0.00208365	1.93224	0.329234	1.88683	0.119748	0.549409	0.0339492	0.00134562	1.94244	0.234711	1.91957	0.0605372	0.544727	0.0289943	0.000925549	1.95995	0.184418	1.94608	0.0362473			1.64271	1.03986	2.23437	1.21928	2.82452	1.4448	78	7	5	4	3	4	3		1.28168	1.01974	1.49478	1.10421	1.68063	1.202
			population 3
	true	true	7							15							30
	mean	rr	mean	stdev	mse	mrr	srr	prr	mse_rr	mean	stdev	mse	mrr	srr	prr	mse_rr	mean	stdev	mse	mrr	srr	prr	mse_rr
Random	0.210689	2.02012	0.204913	0.0279516	0.000814654	2.04561	1.00129	1.81165	1.04604	0.20388	0.0198719	0.000441255	1.92775	0.53049	1.82488	0.319538	0.203029	0.0140071	0.000254874	1.87196	0.338999	1.82577	0.152692
NewEPI	0.210689	2.02012	0.208025	0.0295088	0.000877866	1.97141	1.05688	1.75552	1.18701	0.206448	0.0235005	0.000570259	1.85239	0.546845	1.74207	0.376351	0.20754	0.0194834	0.000389519	1.81484	0.386412	1.756	0.219074			1.07759	1.13476	1.29236	1.1778	1.52828	1.43474	91	3	3	3	2	3	4		1.03807	1.06525	1.13682	1.08526	1.23624	1.19781
Grid	0.210689	2.02012	0.219886	0.0321219	0.0011164	2.42317	1.50011	1.95181	2.255	0.219353	0.0259142	0.000746611	2.19282	0.898436	1.9634	0.810404	0.218992	0.0223208	0.000567158	2.09297	0.584184	1.96921	0.343863			1.3704	2.15574	1.69202	2.53617	2.22524	2.252	91	5	7	6	8	7	8		1.17064	1.46824	1.30078	1.59254	1.49173	1.50067
Peri	0.210689	2.02012	0.208372	0.0287904	0.000834255	1.99262	1.08611	1.70476	1.27909	0.213023	0.0215349	0.000469199	1.89007	0.652518	1.74216	0.503042	0.216866	0.0172768	0.000336643	1.95621	0.443722	1.87326	0.218457			1.02406	1.22279	1.06333	1.57428	1.32082	1.4307	91	2	5	2	4	2	3		1.01196	1.1058	1.03118	1.2547	1.14927	1.19612
Quad	0.210689	2.02012	0.226599	0.0284761	0.00106402	2.10789	1.00632	1.85071	1.04138	0.225894	0.0209328	0.000669374	1.96505	0.607378	1.83559	0.402959	0.227134	0.0161403	0.000530947	1.96569	0.41253	1.89201	0.186593			1.3061	0.995543	1.51698	1.26107	2.08317	1.22202	91	4	2	4	3	5	2		1.14285	0.997769	1.23166	1.12297	1.44332	1.10545
Square	0.210689	2.02012	0.205212	0.0275058	0.000786566	2.0997	0.836697	1.88379	0.718648	0.206421	0.0199654	0.000416833	1.95548	0.500062	1.86155	0.275206	0.2059	0.0134867	0.000204826	1.92516	0.330184	1.88201	0.128096			0.965522	0.687017	0.944654	0.861263	0.803633	0.838915	91	1	1	1	1	1	1		0.98261	0.828865	0.971933	0.928042	0.896456	0.915923
OldEPI	0.210689	2.02012	0.227025	0.0307487	0.00121235	2.29907	1.38017	1.90914	1.91719	0.226484	0.0243427	0.000842049	2.16965	0.780715	1.97129	0.6119	0.226514	0.0204155	0.000667223	2.12041	0.546578	2.00559	0.298959			1.48817	1.8328	1.90831	1.91495	2.61785	1.95792	91	8	6	8	6	8	7		1.21991	1.35381	1.38141	1.38382	1.61798	1.39926
EPI3	0.210689	2.02012	0.226722	0.0303544	0.00117845	2.50477	1.6442	2.04738	2.70414	0.225493	0.0229207	0.000744517	2.24928	0.855713	2.04747	0.732993	0.224484	0.0189309	0.000548681	2.18545	0.525915	2.09175	0.281717			1.44656	2.58511	1.68727	2.29391	2.15275	1.845	91	6	8	5	7	6	6		1.20273	1.60783	1.29895	1.51457	1.46723	1.35831
EPI5	0.210689	2.02012	0.225853	0.0310201	0.00119219	2.2584	1.11917	1.93513	1.25976	0.225636	0.0233426	0.00076829	2.20491	0.716002	2.03948	0.513034	0.221931	0.0186571	0.00047447	2.21124	0.504906	2.12506	0.265942			1.46344	1.20432	1.74115	1.60555	1.86158	1.74169	91	7	4	7	5	4	5		1.20973	1.09741	1.31953	1.2671	1.3644	1.31973
			population 4
	true	true	7							15							30
	mean	rr	mean	stdev	mse	mrr	srr	prr	mse_rr	mean	stdev	mse	mrr	srr	prr	mse_rr	mean	stdev	mse	mrr	srr	prr	mse_rr
Random	0.175345	2.11954	0.179025	0.0302418	0.000928109	2.47765	0.899839	2.2804	0.835586	0.177613	0.0223873	0.000506335	2.3167	0.570899	2.22656	0.337379	0.177935	0.015903	0.000259614	2.32444	0.393717	2.28003	0.18077
NewEPI	0.175345	2.11954	0.182348	0.0394125	0.00160239	2.50376	0.954619	2.29103	0.940706	0.180423	0.0346149	0.00122398	2.42009	0.730217	2.29554	0.564193	0.181782	0.031702	0.00104645	2.32597	0.554015	2.26091	0.326918			1.72651	1.1258	2.41733	1.67228	4.03081	1.80847	104	2	6	2	7	2	7		1.31397	1.06104	1.55478	1.29317	2.00769	1.3448
Grid	0.175345	2.11954	0.188084	0.0440068	0.00209888	2.5476	1.1092	2.31081	1.26691	0.189421	0.0392001	0.00173478	2.42445	0.753706	2.29669	0.599455	0.190092	0.0369414	0.00158214	2.34254	0.555618	2.27616	0.333241			2.26146	1.51619	3.42615	1.7768	6.09422	1.84345	104	4	8	4	8	4	8		1.50381	1.23134	1.85099	1.33297	2.46865	1.35774
Peri	0.175345	2.11954	0.206839	0.0306963	0.00193413	2.44542	0.893273	2.25855	0.81726	0.200545	0.0258423	0.00130286	2.23046	0.517916	2.1501	0.269171	0.203417	0.0225471	0.00129641	2.25635	0.394868	2.20855	0.163844			2.08395	0.978068	2.57313	0.79783	4.99361	0.906364	104	3	2	3	1	3	2		1.44359	0.988973	1.6041	0.893213	2.23464	0.952031
Quad	0.175345	2.11954	0.214787	0.033808	0.00269865	2.44053	0.790132	2.27615	0.648835	0.213671	0.0254239	0.00211526	2.31132	0.534925	2.22744	0.297787	0.211559	0.0207845	0.00174345	2.27607	0.359727	2.23763	0.143349			2.90769	0.776503	4.17758	0.882649	6.71556	0.792989	104	5	1	5	2	5	1		1.70519	0.881194	2.04391	0.939494	2.59144	0.890499
Square	0.175345	2.11954	0.181806	0.0304562	0.000969325	2.47884	0.903992	2.29572	0.848241	0.18187	0.0229076	0.000567334	2.35965	0.576704	2.26955	0.355091	0.18145	0.0170663	0.000328529	2.34781	0.392354	2.30149	0.187047			1.04441	1.01514	1.12047	1.0525	1.26546	1.03473	104	1	3	1	3	1	3		1.02196	1.00754	1.05852	1.02591	1.12492	1.01721
OldEPI	0.175345	2.11954	0.214311	0.0413596	0.00322897	2.42323	0.932126	2.22587	0.880165	0.216917	0.037357	0.00312378	2.38203	0.663691	2.26649	0.46208	0.216612	0.0347059	0.00290746	2.34835	0.525858	2.27549	0.300847			3.47908	1.05335	6.16939	1.36962	11.1992	1.66425	104	6	4	8	4	8	6		1.86523	1.02633	2.48383	1.17031	3.34652	1.29006
EPI3	0.175345	2.11954	0.215563	0.0409016	0.00329043	2.49794	0.971037	2.28016	0.968712	0.213546	0.0357199	0.00273523	2.44706	0.651441	2.33652	0.471456	0.212914	0.031576	0.00240847	2.35824	0.499673	2.29775	0.281432			3.5453	1.15932	5.40201	1.39741	9.27715	1.55685	104	7	7	6	5	6	4		1.8829	1.07672	2.32422	1.18212	3.04584	1.24774
EPI5	0.175345	2.11954	0.218558	0.0403272	0.00349365	2.51659	0.927404	2.32469	0.902165	0.216507	0.0351429	0.00292933	2.4251	0.668929	2.3197	0.48753	0.216163	0.0311287	0.0026351	2.38918	0.491291	2.33442	0.28754			3.76426	1.07968	5.78537	1.44505	10.1501	1.59064	104	8	5	7	6	7	5		1.94017	1.03908	2.40528	1.2021	3.18592	1.26121
			population 5
	true	true	7							15							30
	mean	rr	mean	stdev	mse	mrr	srr	prr	mse_rr	mean	stdev	mse	mrr	srr	prr	mse_rr	mean	stdev	mse	mrr	srr	prr	mse_rr
Random	0.100403	1.98204	0.0984171	0.0237002	0.000565643	2.95886	2.28049	2.20703	5.25126	0.0973234	0.0164844	0.000281219	2.8014	1.72239	2.32397	3.08354	0.0978139	0.0114338	0.000137435	2.42137	0.802579	2.24992	0.715893
NewEPI	0.100403	1.98204	0.103937	0.0335309	0.00113681	2.80379	2.19439	2.07433	4.82386	0.103321	0.0309518	0.000966529	3.09899	2.69943	2.15632	7.3173	0.100931	0.0287065	0.000824342	2.47039	1.5961	1.99186	2.54763			2.00977	0.918612	3.43692	2.37302	5.99804	3.55868	117	7	6	8	7	8	6		1.41766	0.958442	1.85389	1.54046	2.44909	1.88645
Grid	0.100403	1.98204	0.10301	0.0343482	0.0011866	2.79759	2.29849	1.9059	5.28885	0.102431	0.0309404	0.000961421	2.87588	2.7087	1.89577	7.3445	0.102046	0.0286117	0.000821329	2.59367	2.14706	1.92983	4.61259			2.09778	1.00716	3.41876	2.38184	5.97612	6.44313	117	8	8	7	8	7	8		1.44837	1.00357	1.84899	1.54332	2.44461	2.53833
Peri	0.100403	1.98204	0.0875608	0.0256402	0.000822342	2.20643	1.76839	1.59656	3.2758	0.0835796	0.0223949	0.000784558	1.96062	1.49459	1.48718	2.47869	0.0841804	0.0206894	0.000691224	1.83783	1.17331	1.49794	1.61101			1.45382	0.623812	2.78984	0.803843	5.02946	2.25035	117	3	3	5	2	5	5		1.20574	0.789818	1.67028	0.896573	2.24265	1.50012
Quad	0.100403	1.98204	0.0948857	0.0247317	0.000642097	2.22614	1.67567	1.68302	2.89728	0.0950662	0.01923	0.000398274	2.11773	1.49406	1.65931	2.33637	0.0958929	0.0162033	0.000282888	1.9405	0.936141	1.66759	0.975239			1.13516	0.551732	1.41624	0.75769	2.05834	1.36227	117	2	2	2	1	2	2		1.06544	0.742786	1.19006	0.870454	1.43469	1.16716
Square	0.100403	1.98204	0.0974034	0.0235511	0.000563652	2.94741	2.19796	2.19635	4.87696	0.0975905	0.0165655	0.000282326	2.62555	1.69397	2.17437	2.90653	0.098004	0.0116971	0.000142577	2.38203	0.791858	2.20893	0.678518			0.99648	0.928722	1.00393	0.942593	1.03742	0.947793	117	1	7	1	4	1	1		0.998238	0.963702	1.00197	0.970872	1.01854	0.973547
OldEPI	0.100403	1.98204	0.0936362	0.0307629	0.000992146	2.35624	1.9253	1.65066	3.81659	0.0928894	0.0275888	0.000817596	2.44163	2.26342	1.63798	5.24145	0.0930278	0.0257661	0.000718285	2.19954	1.61399	1.6734	2.70022			1.75401	0.726796	2.90732	1.69981	5.22636	3.77183	117	6	5	6	6	6	7		1.32439	0.852523	1.70509	1.30377	2.28612	1.94212
EPI3	0.100403	1.98204	0.0917034	0.0297231	0.000959146	2.38321	1.91399	1.6673	3.76242	0.0932158	0.026539	0.000755974	2.29293	1.85253	1.66889	3.52993	0.0941605	0.0243161	0.000630241	1.97813	1.082	1.68619	1.25825			1.69567	0.71648	2.6882	1.14476	4.58574	1.7576	117	4	4	4	5	4	4		1.30218	0.846451	1.63957	1.06994	2.14143	1.32574
EPI5	0.100403	1.98204	0.0921459	0.0300088	0.000968708	2.24317	1.6714	1.71248	2.86624	0.0941389	0.0261845	0.000724867	2.24677	1.63356	1.72064	2.73685	0.0940221	0.0237474	0.000604655	2.022	1.08629	1.72316	1.24704			1.71258	0.54582	2.57759	0.887566	4.39957	1.74194	117	5	1	3	3	3	3		1.30865	0.738796	1.60549	0.942107	2.09751	1.31983
			population 6
	true	true	7							15							30
	mean	rr	mean	stdev	mse	mrr	srr	prr	mse_rr	mean	stdev	mse	mrr	srr	prr	mse_rr	mean	stdev	mse	mrr	srr	prr	mse_rr
Random	0.336396	2.20136	0.333735	0.0373128	0.00139933	2.32553	0.582804	2.22437	0.34019	0.331798	0.0264615	0.000721353	2.29666	0.363859	2.25278	0.135037	0.333504	0.0187388	0.000359506	2.25707	0.251307	2.2363	0.064376
NewEPI	0.336396	2.20136	0.33445	0.0529378	0.0028062	2.37723	0.672742	2.2413	0.454177	0.332644	0.0474006	0.00226089	2.31351	0.575568	2.21429	0.331446	0.333473	0.0449986	0.00203342	2.30124	0.519822	2.2191	0.27053			2.00539	1.33507	3.13424	2.45447	5.65614	4.20234	130	6	5	6	7	6	7		1.41612	1.15545	1.77038	1.56668	2.37826	2.04996
Grid	0.336396	2.20136	0.315904	0.0557879	0.00353221	2.39155	0.847779	2.21016	0.718807	0.315778	0.0512879	0.00305555	2.32194	0.644217	2.20455	0.415026	0.314857	0.0483313	0.00279984	2.29261	0.535985	2.20711	0.287313			2.52422	2.11296	4.23586	3.07341	7.78802	4.46304	130	8	8	8	8	8	8		1.58878	1.4536	2.05812	1.75312	2.7907	2.11259
Peri	0.336396	2.20136	0.320663	0.0408819	0.00191886	1.82229	0.443079	1.75951	0.39155	0.31815	0.0346614	0.00153433	1.83001	0.355192	1.78581	0.298843	0.313912	0.032285	0.00154785	1.94195	0.338868	1.9027	0.204029			1.37127	1.15098	2.12702	2.21304	4.30549	3.16934	130	3	3	3	5	3	5		1.17101	1.07284	1.45843	1.48763	2.07497	1.78026
Quad	0.336396	2.20136	0.339238	0.0408567	0.00167735	2.11715	0.503624	2.03573	0.28107	0.341016	0.033199	0.00112352	2.07013	0.367474	2.02386	0.166543	0.341327	0.0291811	0.000875851	2.07461	0.290189	2.04515	0.108611			1.19868	0.826216	1.55752	1.23331	2.43626	1.68714	130	1	1	1	2	2	2		1.09484	0.908964	1.248	1.11055	1.56085	1.2989
Square	0.336396	2.20136	0.31403	0.0360362	0.00179885	2.32637	0.57262	2.23147	0.3288	0.313776	0.0261813	0.00119712	2.28644	0.381519	2.24129	0.147151	0.314583	0.0183699	0.00081326	2.2767	0.267676	2.25369	0.0743889			1.28551	0.96652	1.65956	1.08971	2.26216	1.15554	130	2	2	2	1	1	1		1.1338	0.983117	1.28824	1.04389	1.50405	1.07496
OldEPI	0.336396	2.20136	0.339681	0.0548255	0.00301663	2.15242	0.652958	2.02812	0.456366	0.336963	0.0500029	0.00250061	2.14759	0.540699	2.055	0.313777	0.333953	0.0461961	0.00214005	2.15999	0.467735	2.08931	0.231331			2.15577	1.3415	3.46656	2.32363	5.95274	3.59344	130	7	6	7	6	7	6		1.46825	1.15823	1.86187	1.52435	2.43982	1.89564
EPI3	0.336396	2.20136	0.336595	0.0524643	0.00275254	2.19015	0.641818	2.06904	0.429439	0.331494	0.0469065	0.00222425	2.1855	0.512521	2.10266	0.272419	0.329125	0.0423416	0.00184568	2.20361	0.424897	2.14696	0.183497			1.96705	1.26235	3.08344	2.01736	5.13393	2.85039	130	4	4	5	4	5	4		1.40252	1.12354	1.75597	1.42034	2.26582	1.68831
EPI5	0.336396	2.20136	0.330498	0.0526031	0.00280187	2.25174	0.687575	2.12032	0.479327	0.329385	0.0459069	0.0021566	2.21555	0.500958	2.13812	0.254958	0.327807	0.0401842	0.00168854	2.22853	0.415404	2.17629	0.173189			2.0023	1.409	2.98966	1.88806	4.69683	2.69027	130	5	7	4	3	4	3		1.41503	1.18701	1.72906	1.37407	2.16722	1.6402
			population 7
	true	true	7							15							30
	mean	rr	mean	stdev	mse	mrr	srr	prr	mse_rr	mean	stdev	mse	mrr	srr	prr	mse_rr	mean	stdev	mse	mrr	srr	prr	mse_rr
Random	0.0621542	1.73259	0.0609596	0.0163852	0.000269902	1.89641	1.14607	1.79096	1.31688	0.060704	0.0115737	0.000136054	2.35722	1.7214	1.69907	2.96434	0.0608672	0.0082121	6.90948e-05	2.20367	1.8403	1.62806	3.39763
NewEPI	0.0621542	1.73259	0.0625968	0.0184619	0.000341037	1.86454	1.17947	1.68597	1.39332	0.0616986	0.0137536	0.000189369	2.18987	1.6798	1.58199	2.84441	0.0626156	0.0115803	0.000134316	2.36912	1.92385	1.67877	3.7041			1.26356	1.05805	1.39187	0.959541	1.94394	1.0902	143	6	6	5	6	6	8		1.12408	1.02861	1.17978	0.979562	1.39425	1.04413
Grid	0.0621542	1.73259	0.0623318	0.0192078	0.000368971	1.85097	1.28335	1.65182	1.65351	0.0623335	0.0149025	0.000222117	2.25725	1.70254	1.66158	2.90368	0.0620615	0.0119881	0.000143723	2.21484	1.66663	1.63064	2.78805			1.36706	1.25562	1.63257	0.979538	2.08008	0.820586	143	8	8	7	7	7	5		1.16921	1.12055	1.27772	0.989716	1.44225	0.905862
Peri	0.0621542	1.73259	0.0584349	0.0161672	0.000275211	1.61632	1.10752	1.37413	1.35509	0.0604237	0.0134238	0.000183193	1.91021	1.45593	1.38177	2.24281	0.0575584	0.0105401	0.000132215	1.7859	1.17259	1.38829	1.49351			1.01967	1.02902	1.34648	0.756595	1.91353	0.439574	143	1	5	4	3	5	1		1.00979	1.0144	1.16038	0.869825	1.3833	0.663004
Quad	0.0621542	1.73259	0.0612518	0.0174631	0.000305774	1.62065	0.973565	1.5096	0.997553	0.0602484	0.0130784	0.000174677	1.95979	1.43343	1.45525	2.13164	0.0604603	0.00919983	8.7506e-05	1.89626	1.32037	1.43718	1.83064			1.13291	0.757511	1.28388	0.719094	1.26646	0.5388	143	3	1	2	2	2	3		1.06438	0.870351	1.13308	0.847994	1.12537	0.73403
Square	0.0621542	1.73259	0.0606159	0.016942	0.000289398	1.88822	1.20064	1.72171	1.44165	0.0603446	0.0117998	0.00014251	2.34489	1.7484	1.68214	3.05945	0.0603274	0.00867913	7.86643e-05	2.29684	1.8225	1.72289	3.3216			1.07223	1.09475	1.04745	1.03208	1.1385	0.977623	143	2	7	1	8	1	7		1.03549	1.0463	1.02345	1.01592	1.067	0.988748
OldEPI	0.0621542	1.73259	0.0608955	0.0184945	0.000343631	1.51189	1.03155	1.35891	1.20373	0.0605321	0.0148359	0.000222735	2.018	1.50476	1.4593	2.33899	0.06061	0.0119544	0.000145292	1.97587	1.48518	1.4585	2.28088			1.27317	0.914076	1.63711	0.789042	2.10279	0.671316	143	7	4	8	4	8	4		1.12835	0.956073	1.2795	0.88828	1.4501	0.819339
EPI3	0.0621542	1.73259	0.0608234	0.0180172	0.00032639	1.58344	1.01114	1.4288	1.11469	0.0605326	0.0138951	0.000195703	1.93705	1.37454	1.45177	1.96822	0.0600777	0.0107424	0.000119711	1.90804	1.31864	1.47757	1.80385			1.20929	0.846462	1.43843	0.663965	1.73256	0.530913	143	5	2	6	1	4	2		1.09968	0.920034	1.19935	0.814841	1.31627	0.728638
EPI5	0.0621542	1.73259	0.0603099	0.0177801	0.000319533	1.6303	1.0657	1.47879	1.20013	0.0596266	0.0132598	0.000182211	2.09042	1.51539	1.52104	2.34116	0.0587359	0.00991187	0.00010993	2.05955	1.72239	1.53338	3.00631			1.18389	0.911342	1.33926	0.789774	1.591	0.884826	143	4	3	3	5	3	6		1.08807	0.954642	1.15726	0.888692	1.26135	0.940652
			population 8
	true	true	7							15							30
	mean	rr	mean	stdev	mse	mrr	srr	prr	mse_rr	mean	stdev	mse	mrr	srr	prr	mse_rr	mean	stdev	mse	mrr	srr	prr	mse_rr
Random	0.359348	1.98669	0.357773	0.0382708	0.00146713	2.13802	0.840227	1.92927	0.709278	0.358905	0.0270569	0.000732272	2.0134	0.453397	1.93259	0.208496	0.358021	0.0183479	0.000338406	1.96492	0.303815	1.92579	0.0960124
NewEPI	0.359348	1.98669	0.363054	0.0504733	0.00256129	2.1189	0.933219	1.88192	0.881874	0.360667	0.0479987	0.00230561	1.97956	0.664285	1.84243	0.462086	0.364855	0.0479795	0.00233236	2.15975	0.681195	2.01235	0.464685			1.74578	1.24334	3.14858	2.21628	6.89219	4.83985	156	3	2	6	5	8	7		1.32128	1.11505	1.77442	1.48872	2.6253	2.19997
Grid	0.359348	1.98669	0.353865	0.0547105	0.0030233	2.37114	1.85048	1.88299	3.43503	0.353995	0.0512843	0.00265873	2.15387	0.964773	1.90601	0.937296	0.353581	0.0479423	0.00233172	2.07116	0.688108	1.92354	0.477481			2.06068	4.84299	3.6308	4.49552	6.8903	4.97312	156	8	8	8	8	7	8		1.43551	2.20068	1.90547	2.12026	2.62494	2.23005
Peri	0.359348	1.98669	0.326207	0.0403593	0.0027272	1.91459	1.16688	1.66831	1.46297	0.330153	0.0350181	0.00207862	1.78694	0.582311	1.64433	0.456296	0.331914	0.0314532	0.00174193	1.73289	0.442751	1.64275	0.314323			1.85886	2.06262	2.83858	2.18852	5.14745	3.27378	156	6	4	4	4	4	5		1.3634	1.43618	1.68481	1.47936	2.2688	1.80936
Quad	0.359348	1.98669	0.370992	0.0416674	0.00187175	2.20556	1.26539	1.91735	1.60602	0.369559	0.0321379	0.00113711	2.03333	0.623788	1.91166	0.394741	0.373914	0.0272528	0.000954883	1.93479	0.406633	1.86076	0.181209			1.27579	2.2643	1.55285	1.89328	2.82171	1.88735	156	2	7	2	2	2	2		1.12951	1.50476	1.24613	1.37597	1.67979	1.37381
Square	0.359348	1.98669	0.355486	0.0363592	0.00133691	2.10379	0.839769	1.90427	0.712005	0.354987	0.0256562	0.000677259	1.98662	0.452409	1.90605	0.211177	0.355139	0.0181979	0.000348879	1.94094	0.297601	1.90347	0.0954919			0.911236	1.00384	0.924873	1.01286	1.03095	0.994579	156	1	1	1	1	1	1		0.954587	1.00192	0.961703	1.00641	1.01536	0.997286
OldEPI	0.359348	1.98669	0.371634	0.0526813	0.00292626	2.18385	1.23913	1.83885	1.5573	0.371762	0.0469307	0.0023566	2.07951	0.821794	1.87891	0.686962	0.371287	0.0433592	0.00202256	2.0238	0.603172	1.89998	0.371335			1.99454	2.19561	3.2182	3.29485	5.97672	3.86758	156	7	6	7	7	6	6		1.41228	1.48176	1.79393	1.81517	2.44473	1.96662
EPI3	0.359348	1.98669	0.371208	0.0503535	0.00267613	2.19587	1.0587	1.89612	1.12905	0.371144	0.0447769	0.00214412	2.07108	0.664372	1.91736	0.446197	0.369782	0.0405716	0.00175492	2.08073	0.514089	1.98776	0.264289			1.82406	1.59183	2.92803	2.14008	5.18585	2.75265	156	5	3	5	3	5	4		1.35058	1.26168	1.71115	1.4629	2.27725	1.65911
EPI5	0.359348	1.98669	0.370814	0.0498446	0.00261595	2.27746	1.24152	1.97638	1.54148	0.370822	0.043756	0.00204624	2.16294	0.716349	2.01113	0.513753	0.370582	0.0381671	0.00158293	2.0895	0.463725	2.02029	0.21617			1.78304	2.1733	2.79437	2.4641	4.6776	2.25148	156	4	5	3	6	3	3		1.3353	1.47421	1.67164	1.56974	2.16278	1.50049
			population 9
	true	true	7							15							30
	mean	rr	mean	stdev	mse	mrr	srr	prr	mse_rr	mean	stdev	mse	mrr	srr	prr	mse_rr	mean	stdev	mse	mrr	srr	prr	mse_rr
Random	0.101334	2.21233	0.101348	0.0215919	0.00046621	2.8489	1.47114	2.80682	2.51767	0.101035	0.0150404	0.000226303	3.64462	2.3432	2.75119	5.78096	0.101066	0.0103434	0.000107058	3.32329	2.14795	2.6515	4.80656
NewEPI	0.101334	2.21233	0.10229	0.023146	0.000536651	2.84459	1.59852	2.81217	2.91507	0.101485	0.0190238	0.000361928	3.61413	2.49734	2.66958	6.44578	0.101306	0.0163984	0.000268908	3.59647	2.58001	2.76946	6.96685			1.15109	1.15785	1.59931	1.115	2.51181	1.44945	169	4	6	4	7	4	8		1.07289	1.07603	1.26464	1.05594	1.58487	1.20393
Grid	0.101334	2.21233	0.095274	0.023942	0.000609943	2.65441	1.78078	2.12078	3.17956	0.0954966	0.0202308	0.00044336	2.97478	2.22121	2.08702	4.94948	0.0953183	0.0169696	0.000324156	2.89982	2.11515	2.16288	4.4763			1.3083	1.2629	1.95915	0.856169	3.02786	0.931291	169	8	8	8	5	7	7		1.14381	1.12379	1.39969	0.925294	1.74008	0.965034
Peri	0.101334	2.21233	0.0998083	0.0209068	0.000439422	2.64978	1.77214	2.15715	3.14353	0.0981725	0.0154919	0.000249994	3.27007	2.56731	2.26035	6.59339	0.0953965	0.0130401	0.000205298	2.74881	1.88731	2.11722	3.57098			0.94254	1.24858	1.10469	1.14054	1.91764	0.74294	169	1	7	1	8	3	2		0.970845	1.1174	1.05104	1.06796	1.38479	0.86194
Quad	0.101334	2.21233	0.0928244	0.0205887	0.000496308	2.2642	1.44691	1.86107	2.21693	0.0927271	0.0154581	0.000313032	2.45116	1.7719	1.82715	3.28799	0.0931119	0.0116713	0.000203822	2.36493	1.65928	1.82647	2.9021			1.06456	0.880549	1.38324	0.568763	1.90385	0.603779	169	3	4	3	1	2	1		1.03177	0.938376	1.17611	0.754164	1.3798	0.777032
Square	0.101334	2.21233	0.0940829	0.0202833	0.000463991	2.65266	1.43194	2.5294	2.15099	0.0943403	0.0152608	0.000281804	3.34151	2.19797	2.61358	4.99207	0.0947991	0.0106586	0.000156311	3.2041	2.05489	2.58214	4.35933			0.995239	0.854355	1.24525	0.863538	1.46006	0.906955	169	2	3	2	6	1	6		0.997617	0.924313	1.11591	0.929267	1.20833	0.952342
OldEPI	0.101334	2.21233	0.0936595	0.0221328	0.000548759	2.22053	1.54004	1.81567	2.52906	0.092928	0.018544	0.000414541	2.50463	1.8723	1.81034	3.6671	0.0919291	0.0153964	0.000325501	2.51201	1.99873	1.87465	4.10895			1.17706	1.00452	1.83179	0.634342	3.04043	0.854863	169	6	5	7	2	8	5		1.08493	1.00226	1.35344	0.796456	1.74368	0.924588
EPI3	0.101334	2.21233	0.0924185	0.0215647	0.000544522	2.12517	1.40557	1.8309	2.12112	0.092212	0.0173373	0.000383793	2.58053	1.9282	1.86818	3.83639	0.0917953	0.0149065	0.00031319	2.56746	1.92919	1.96065	3.78512			1.16798	0.842491	1.69592	0.663626	2.92544	0.78749	169	5	2	5	3	6	3		1.08073	0.917873	1.30228	0.814633	1.71039	0.887406
EPI5	0.101334	2.21233	0.0927712	0.0222289	0.000567445	2.17862	1.39979	1.85229	2.08904	0.0927331	0.0183592	0.000411036	2.5985	1.96341	1.8485	3.98735	0.0930541	0.0146693	0.000283745	2.55631	1.98122	1.94382	3.99733			1.21714	0.829751	1.81631	0.689739	2.65039	0.831641	169	7	1	6	4	5	4		1.10324	0.910907	1.3477	0.830505	1.628	0.911943
			population 10
	true	true	7							15							30
	mean	rr	mean	stdev	mse	mrr	srr	prr	mse_rr	mean	stdev	mse	mrr	srr	prr	mse_rr	mean	stdev	mse	mrr	srr	prr	mse_rr
Random	0.223905	1.95593	0.215671	0.0351048	0.00130015	2.33887	1.23508	1.98595	1.52632	0.21505	0.0244626	0.00067683	2.17562	0.751554	2.00021	0.566794	0.215292	0.017287	0.000373024	2.0955	0.453994	2.01988	0.2102
NewEPI	0.223905	1.95593	0.21667	0.0418742	0.00180579	2.45535	2.03765	1.96834	4.15217	0.215722	0.0385658	0.00155428	2.15713	0.856091	1.96095	0.732917	0.217254	0.0350364	0.00127179	2.07292	0.635887	1.96097	0.404378			1.38892	2.72037	2.29642	1.29309	3.40939	1.92377	182	4	8	3	2	4	2		1.17852	1.64936	1.51539	1.13714	1.84645	1.387
Grid	0.223905	1.95593	0.221696	0.0483299	0.00234066	2.38512	1.71334	1.83141	2.95104	0.221246	0.043274	0.00187971	2.27994	1.57654	1.84445	2.49791	0.220676	0.0414736	0.00173049	2.14672	1.26855	1.86556	1.61739			1.80031	1.93343	2.77723	4.40708	4.63907	7.6945	182	8	6	7	8	8	8		1.34175	1.39048	1.6665	2.0993	2.15385	2.7739
Peri	0.223905	1.95593	0.198553	0.0333801	0.00175695	1.975	1.30619	1.54294	1.87669	0.196282	0.0289957	0.00160378	1.82384	1.04671	1.54033	1.26833	0.19984	0.0259346	0.00125173	1.71477	0.660089	1.56453	0.588911			1.35135	1.22955	2.36955	2.23772	3.35562	2.80167	182	3	2	4	4	3	5		1.16248	1.10885	1.53933	1.4959	1.83184	1.67382
Quad	0.223905	1.95593	0.218389	0.0375124	0.00143761	2.09947	1.38898	1.64309	2.02713	0.217	0.0293645	0.000909953	1.98	1.10728	1.69336	1.29501	0.216428	0.025829	0.000723043	1.80684	0.584446	1.67196	0.422216			1.10573	1.32812	1.34443	2.2848	1.93833	2.00864	182	2	3	2	5	2	4		1.05154	1.15244	1.1595	1.51156	1.39224	1.41726
Square	0.223905	1.95593	0.213293	0.0338243	0.0012567	2.32504	1.33992	1.94808	1.79545	0.213375	0.0237975	0.000677202	2.12887	0.782945	1.95718	0.613004	0.213602	0.017404	0.000409051	2.03089	0.440032	1.95854	0.193635			0.966582	1.17632	1.00055	1.08153	1.09658	0.921193	182	1	1	1	1	1	1		0.983149	1.08458	1.00027	1.03997	1.04718	0.959788
OldEPI	0.223905	1.95593	0.218126	0.0476273	0.00230176	2.28554	1.96823	1.69652	3.94122	0.218129	0.0432071	0.00190022	2.08866	1.45495	1.69513	2.1849	0.217756	0.0410672	0.00172433	1.96493	0.974669	1.72328	1.00411			1.77038	2.58217	2.80752	3.85483	4.62256	4.7769	182	7	7	8	7	7	7		1.33056	1.60691	1.67557	1.96337	2.15001	2.18561
EPI3	0.223905	1.95593	0.217408	0.0464913	0.00220365	2.26365	1.69288	1.74547	2.91014	0.218105	0.0410242	0.00171662	2.05284	1.09357	1.7541	1.23663	0.217423	0.0366466	0.00138499	1.97178	0.80612	1.80218	0.673469			1.69493	1.90663	2.53627	2.1818	3.71287	3.20394	182	6	5	6	3	6	6		1.30189	1.38081	1.59257	1.47709	1.92688	1.78996
EPI5	0.223905	1.95593	0.219683	0.0459323	0.0021276	2.11992	1.54884	1.65683	2.48837	0.218761	0.0398433	0.00161395	2.0325	1.32356	1.72589	1.80473	0.217345	0.0353447	0.00129228	1.88146	0.6202	1.76555	0.420893			1.63643	1.6303	2.38457	3.1841	3.46434	2.00234	182	5	4	5	6	5	3		1.27923	1.27683	1.54421	1.7844	1.86127	1.41504
			population 11
	true	true	7							15							30
	mean	rr	mean	stdev	mse	mrr	srr	prr	mse_rr	mean	stdev	mse	mrr	srr	prr	mse_rr	mean	stdev	mse	mrr	srr	prr	mse_rr
Random	0.448301	1.87597	0.459844	0.0462946	0.00227643	2.39936	1.46416	2.00549	2.16054	0.458268	0.0317478	0.00110726	2.15549	0.769327	1.9733	0.601337	0.458947	0.021616	0.000580589	2.05418	0.467857	1.97305	0.228315
NewEPI	0.448301	1.87597	0.458632	0.0546889	0.00309761	2.38736	1.62219	1.9219	2.63361	0.457148	0.0515656	0.00273728	2.12574	0.999089	1.89898	0.998708	0.461167	0.0502361	0.0026892	2.06675	0.631134	1.94122	0.402588			1.36073	1.21896	2.47211	1.66081	4.63185	1.7633	195	2	4	2	5	2	5		1.1665	1.10406	1.5723	1.28873	2.15217	1.32789
Grid	0.448301	1.87597	0.451693	0.05965	0.00356963	2.389	1.94562	1.82503	3.78803	0.452481	0.0557617	0.00312684	2.27258	1.79204	1.8235	3.21416	0.451923	0.0531227	0.00283514	2.10065	1.12131	1.81661	1.26086			1.56808	1.75328	2.82393	5.34502	4.88322	5.52246	195	3	8	3	8	3	8		1.25223	1.32411	1.68046	2.31193	2.2098	2.34999
Peri	0.448301	1.87597	0.488873	0.0445046	0.00362675	2.15143	1.23762	1.82528	1.53427	0.505321	0.0349079	0.00446984	2.10122	0.948568	1.88425	0.89985	0.501974	0.0329209	0.00396458	1.97357	0.605338	1.84013	0.367719			1.59317	0.710134	4.03684	1.49641	6.82855	1.61058	195	4	1	4	3	4	4		1.26221	0.842694	2.00919	1.22328	2.61315	1.26909
Quad	0.448301	1.87597	0.546906	0.0468351	0.0119165	2.29733	1.34194	1.98213	1.81207	0.5442	0.0359866	0.0104917	2.19219	0.96012	2.00592	0.938717	0.543905	0.0328075	0.0102165	2.11515	0.499008	2.01687	0.268862			5.23472	0.838713	9.4753	1.56105	17.5967	1.17759	195	5	2	5	4	5	2		2.28795	0.915813	3.0782	1.24942	4.19484	1.08517
Square	0.448301	1.87597	0.455114	0.0440523	0.00198702	2.41657	1.64677	1.96615	2.71998	0.45727	0.0308343	0.0010312	2.11995	0.724323	1.95201	0.530426	0.456831	0.0236821	0.000633603	2.0904	0.460702	2.0077	0.229599			0.872867	1.25894	0.931302	0.882077	1.09131	1.00563	195	1	6	1	1	1	1		0.934274	1.12202	0.96504	0.93919	1.04466	1.00281
OldEPI	0.448301	1.87597	0.545901	0.0599415	0.0131187	2.46641	1.6441	1.99617	2.71751	0.544904	0.0562449	0.0124956	2.36365	1.41148	1.97626	2.00233	0.543825	0.0534045	0.0119769	2.25334	0.976197	1.99374	0.96683			5.76286	1.25779	11.2851	3.3298	20.6288	4.23464	195	8	5	8	7	8	7		2.4006	1.12151	3.35934	1.82477	4.5419	2.05782
EPI3	0.448301	1.87597	0.543691	0.0588217	0.0125592	2.54655	1.73982	2.01182	3.04543	0.543448	0.0539431	0.0119628	2.34508	1.33936	2.01114	1.81216	0.540559	0.0506992	0.0110819	2.25452	0.804992	2.0582	0.68122			5.51708	1.40957	10.8039	3.01354	19.0874	2.98369	195	6	7	7	6	7	6		2.34885	1.18725	3.28693	1.73596	4.36892	1.72734
EPI5	0.448301	1.87597	0.545492	0.0596146	0.013	2.37263	1.41909	1.95866	2.02065	0.543042	0.0535649	0.0118451	2.21143	0.933003	1.99898	0.885626	0.536699	0.0490936	0.0102244	2.17096	0.572983	2.04606	0.35724			5.71069	0.935254	10.6976	1.47276	17.6104	1.56468	195	7	3	6	2	6	3		2.38971	0.967085	3.27072	1.21357	4.19647	1.25087
			population 12
	true	true	7							15							30
	mean	rr	mean	stdev	mse	mrr	srr	prr	mse_rr	mean	stdev	mse	mrr	srr	prr	mse_rr	mean	stdev	mse	mrr	srr	prr	mse_rr
Random	0.354803	2.16391	0.336779	0.0315721	0.00132166	2.27023	0.61194	2.15488	0.374552	0.33809	0.0236876	0.000840427	2.22561	0.429865	2.15897	0.184808	0.338001	0.016862	0.000566634	2.20981	0.290153	2.17955	0.0844334
NewEPI	0.354803	2.16391	0.338068	0.0348846	0.001497	2.24507	0.653243	2.1139	0.429227	0.340458	0.0295984	0.00108184	2.18119	0.451176	2.11624	0.205832	0.340552	0.0253279	0.000844593	2.16345	0.316533	2.13393	0.101092			1.13266	1.14598	1.28726	1.11376	1.49054	1.1973	208	7	1	8	3	8	3		1.06427	1.0705	1.13457	1.05535	1.22088	1.09421
Grid	0.354803	2.16391	0.365746	0.0376838	0.00153982	2.35629	0.811468	2.17801	0.658679	0.364532	0.0303095	0.00101332	2.28102	0.522898	2.19294	0.274265	0.363187	0.0270844	0.000803856	2.23693	0.378703	2.19164	0.144185			1.16506	1.75858	1.20572	1.48405	1.41865	1.70768	208	8	8	7	8	7	8		1.07938	1.32611	1.09805	1.21822	1.19107	1.30678
Peri	0.354803	2.16391	0.362863	0.035143	0.00129999	2.29161	0.753318	2.12871	0.568727	0.366243	0.0282481	0.000928829	2.15437	0.429136	2.09095	0.189481	0.365207	0.0240881	0.00068848	2.15412	0.316293	2.12165	0.101827			0.983606	1.51842	1.10519	1.02528	1.21503	1.20601	208	4	4	6	2	5	4		0.991769	1.23224	1.05128	1.01256	1.10229	1.09818
Quad	0.354803	2.16391	0.365855	0.0323635	0.00116954	2.33158	0.778874	2.15572	0.606712	0.365335	0.0247545	0.000723708	2.20458	0.481719	2.12424	0.233627	0.365993	0.0198205	0.000518068	2.14116	0.29111	2.10988	0.0876643			0.884903	1.61983	0.86112	1.26416	0.914291	1.03827	208	2	6	2	7	2	1		0.940693	1.27273	0.927966	1.12435	0.956185	1.01895
Square	0.354803	2.16391	0.346627	0.0318638	0.00108215	2.36164	0.660741	2.23038	0.440997	0.347448	0.0226104	0.000565326	2.28916	0.409459	2.23223	0.172324	0.347882	0.0166438	0.000324916	2.25481	0.292135	2.22366	0.0889129			0.818779	1.1774	0.672666	0.932449	0.573414	1.05305	208	1	2	1	1	1	2		0.904864	1.08508	0.820162	0.965634	0.757241	1.02618
OldEPI	0.354803	2.16391	0.365714	0.035413	0.00137313	2.24564	0.768241	2.09193	0.595375	0.363747	0.028958	0.000918561	2.16478	0.470996	2.09226	0.226971	0.36309	0.0250774	0.00069755	2.162	0.34558	2.12235	0.121153			1.03894	1.58957	1.09297	1.22814	1.23104	1.43489	208	6	5	5	5	6	7		1.01929	1.26078	1.04545	1.10822	1.10952	1.19787
EPI3	0.354803	2.16391	0.36313	0.0345856	0.0012655	2.25977	0.783349	2.09821	0.617952	0.362285	0.0290068	0.000897375	2.19726	0.470965	2.12578	0.223262	0.360773	0.0244417	0.000633037	2.17358	0.323727	2.14147	0.105303			0.957509	1.64984	1.06776	1.20807	1.11719	1.24717	208	3	7	4	4	4	5		0.978524	1.28446	1.03333	1.09912	1.05697	1.11677
EPI5	0.354803	2.16391	0.362802	0.0353345	0.00131251	2.29847	0.730783	2.13882	0.534673	0.361711	0.0289139	0.000883734	2.22035	0.478612	2.14492	0.22943	0.359284	0.0239272	0.00059259	2.19856	0.333556	2.16373	0.11126			0.993076	1.4275	1.05153	1.24145	1.04581	1.31772	208	5	3	3	6	3	6		0.996532	1.19478	1.02544	1.1142	1.02265	1.14792
			population 13
	true	true	7							15							30
	mean	rr	mean	stdev	mse	mrr	srr	prr	mse_rr	mean	stdev	mse	mrr	srr	prr	mse_rr	mean	stdev	mse	mrr	srr	prr	mse_rr
Random	0.45164	2.05045	0.443696	0.0379203	0.00150106	2.22734	0.718023	2.07163	0.516006	0.443689	0.025458	0.000711328	2.11291	0.416767	2.04618	0.173713	0.443238	0.0174545	0.000375253	2.08593	0.277694	2.05515	0.077136
NewEPI	0.45164	2.05045	0.443652	0.0423566	0.00185789	2.19284	0.680446	2.04522	0.463034	0.444105	0.0353572	0.00130691	2.13186	0.520459	2.03925	0.271003	0.442593	0.0328236	0.00115924	2.09798	0.38315	2.04493	0.146834			1.23772	0.897343	1.83728	1.56006	3.08921	1.90358	221	5	3	3	4	5	4		1.11253	0.947282	1.35546	1.24902	1.75762	1.3797
Grid	0.45164	2.05045	0.447753	0.0438536	0.00193825	2.34795	0.863773	2.14935	0.755885	0.453971	0.0389976	0.00152625	2.16771	0.593282	2.05252	0.351988	0.452994	0.0345114	0.00119287	2.13764	0.453672	2.0683	0.206137			1.29126	1.46488	2.14563	2.02626	3.17884	2.67238	221	8	8	6	7	7	7		1.13633	1.21032	1.4648	1.42347	1.78293	1.63474
Peri	0.45164	2.05045	0.457656	0.0366446	0.00137902	2.14554	0.613191	2.01176	0.3775	0.458965	0.0321619	0.00108804	2.08663	0.507663	1.99491	0.260806	0.456729	0.0264678	0.000726442	2.02036	0.340315	1.97572	0.121399			0.918699	0.731581	1.52959	1.50136	1.93587	1.57383	221	2	1	2	3	2	3		0.958488	0.855325	1.23677	1.2253	1.39136	1.25452
Quad	0.45164	2.05045	0.468783	0.0362537	0.00160821	2.24518	0.686593	2.09442	0.473343	0.474616	0.0283144	0.0013296	2.0685	0.429707	2.00188	0.187007	0.474064	0.0231937	0.00104078	2.0874	0.334404	2.04756	0.111834			1.07139	0.917322	1.86918	1.07653	2.77355	1.44983	221	3	5	4	2	3	2		1.03508	0.957769	1.36718	1.03756	1.6654	1.20409
Square	0.45164	2.05045	0.444376	0.0356437	0.00132324	2.20073	0.663849	2.05682	0.440736	0.445293	0.0256352	0.000697448	2.10913	0.394613	2.04901	0.155721	0.444285	0.018111	0.000382104	2.09116	0.26836	2.06147	0.0721385			0.881539	0.85413	0.980487	0.89643	1.01826	0.935212	221	1	2	1	1	1	1		0.938903	0.924192	0.990195	0.9468	1.00909	0.967063
OldEPI	0.45164	2.05045	0.465039	0.0411718	0.00187465	2.23225	0.685642	2.08168	0.47108	0.473895	0.0359048	0.00178444	2.15149	0.550231	2.04605	0.302774	0.473842	0.0310919	0.00145963	2.13619	0.455878	2.06573	0.208058			1.24889	0.912936	2.5086	1.74295	3.88973	2.69729	221	6	4	8	5	8	8		1.11754	0.955477	1.58386	1.32021	1.97224	1.64234
EPI3	0.45164	2.05045	0.465491	0.041588	0.00192141	2.2573	0.734653	2.09868	0.542041	0.472859	0.0341839	0.00161878	2.18836	0.595568	2.08313	0.355769	0.469488	0.0295643	0.0011926	2.20287	0.401785	2.14991	0.171323			1.28004	1.05046	2.27572	2.04803	3.17812	2.22106	221	7	7	7	8	6	5		1.13139	1.02492	1.50855	1.43109	1.78273	1.49032
EPI5	0.45164	2.05045	0.465111	0.039014	0.00170356	2.29762	0.722077	2.14595	0.530515	0.469568	0.0344766	0.00151005	2.27873	0.567101	2.17047	0.336008	0.465512	0.0295319	0.00106457	2.26356	0.407753	2.20603	0.190468			1.13491	1.02812	2.12286	1.93427	2.83693	2.46924	221	4	6	5	6	4	6		1.06532	1.01396	1.457	1.39078	1.68432	1.57138
			population 14
	true	true	7							15							30
	mean	rr	mean	stdev	mse	mrr	srr	prr	mse_rr	mean	stdev	mse	mrr	srr	prr	mse_rr	mean	stdev	mse	mrr	srr	prr	mse_rr
Random	0.0716658	2.30461	0.071971	0.0189325	0.000358533	2.75602	1.91597	2.30232	3.67095	0.0712535	0.0134637	0.000181441	2.47399	0.955261	2.30829	0.912537	0.0710418	0.0101979	0.000104386	2.37392	0.626659	2.2908	0.392892
NewEPI	0.0716658	2.30461	0.0711525	0.0259743	0.000674928	2.77678	2.15024	2.30628	4.62353	0.0715579	0.0225432	0.000508207	2.56607	1.7188	2.32376	2.95464	0.0717287	0.0192815	0.00037178	2.47766	0.97578	2.34105	0.953474			1.88247	1.25949	2.80095	3.23783	3.56158	2.42681	234	3	7	3	8	2	8		1.37203	1.12227	1.6736	1.7994	1.88721	1.55782
Grid	0.0716658	2.30461	0.0783686	0.028133	0.000836393	2.90375	2.46987	2.31802	6.10044	0.0783224	0.0250562	0.000672123	2.57789	1.32195	2.32361	1.74791	0.0786081	0.0226365	0.000560607	2.44879	0.953004	2.30848	0.908232			2.33282	1.66182	3.70436	1.91544	5.37049	2.31166	234	4	8	4	7	4	7		1.52736	1.28911	1.92467	1.384	2.31743	1.52041
Peri	0.0716658	2.30461	0.0857868	0.0201357	0.000604849	2.60283	1.35366	2.30307	1.8324	0.0865226	0.0166062	0.00049649	2.67474	0.873647	2.50555	0.803636	0.0852506	0.0144241	0.000392601	2.81621	0.695151	2.70499	0.643539			1.68701	0.499162	2.73637	0.880661	3.76104	1.63795	234	2	1	2	1	3	4		1.29885	0.706514	1.6542	0.938435	1.93934	1.27983
Quad	0.0716658	2.30461	0.0913155	0.02341	0.000934139	2.81467	1.75757	2.44003	3.10739	0.0926912	0.0182572	0.000775393	2.57937	0.921198	2.42263	0.862534	0.0920022	0.0147992	0.000632585	2.48512	0.636481	2.40366	0.414919			2.60545	0.846482	4.27352	0.945205	6.06004	1.05606	234	5	4	5	2	5	2		1.61414	0.920045	2.06725	0.972216	2.46171	1.02765
Square	0.0716658	2.30461	0.0760616	0.0205982	0.000443609	2.73484	1.57968	2.37452	2.50028	0.0763379	0.0142096	0.000223741	2.5144	0.94566	2.34501	0.895905	0.0770328	0.0102263	0.000133382	2.40503	0.578607	2.33213	0.335543			1.23729	0.681099	1.23313	0.981774	1.27777	0.854034	234	1	2	1	3	1	1		1.11234	0.825287	1.11047	0.990845	1.13038	0.92414
OldEPI	0.0716658	2.30461	0.0924661	0.0304982	0.00136279	2.87229	1.8012	2.44608	3.26434	0.0929462	0.0270233	0.00118311	2.66053	1.19497	2.44574	1.44787	0.0928101	0.0247203	0.00105817	2.55954	0.936387	2.44241	0.895809			3.80103	0.889235	6.52065	1.58664	10.1371	2.28004	234	8	5	8	6	8	6		1.94962	0.942993	2.55356	1.25962	3.18388	1.50998
EPI3	0.0716658	2.30461	0.0916734	0.0292658	0.00125679	2.75773	1.61823	2.39125	2.62617	0.0927707	0.0259228	0.00111741	2.56692	1.09422	2.39242	1.20503	0.0902065	0.022543	0.000851944	2.49062	0.810467	2.41254	0.668506			3.50537	0.715395	6.15852	1.32052	8.16145	1.7015	234	7	3	7	5	7	5		1.87226	0.84581	2.48164	1.14914	2.85683	1.30442
EPI5	0.0716658	2.30461	0.0916741	0.0289596	0.00123899	2.8929	2.082	2.48828	4.36846	0.090898	0.024804	0.000985116	2.60856	1.03641	2.46129	1.09869	0.0888738	0.0214749	0.000757286	2.50304	0.756081	2.4313	0.587709			3.45573	1.19001	5.4294	1.204	7.25465	1.49585	234	6	6	6	4	6	3		1.85896	1.09088	2.33011	1.09727	2.69345	1.22305
			population 15
	true	true	7							15							30
	mean	rr	mean	stdev	mse	mrr	srr	prr	mse_rr	mean	stdev	mse	mrr	srr	prr	mse_rr	mean	stdev	mse	mrr	srr	prr	mse_rr
Random	0.122691	2.23043	0.124307	0.0240683	0.000581894	2.92871	2.17983	2.14281	4.75934	0.122306	0.0154332	0.000238332	2.54514	1.38547	2.18958	1.9212	0.123897	0.0113707	0.000130747	2.34546	0.660773	2.21046	0.43702
[truncated: 464 more rows]

## Sheet: RR=3
	Means of Ratios								Means of Ratios of Sqrts
	Prevalence			RR					Prevalence			RR
	n=7	n=15	n=30	n=7	n=15	n=30			n=7	n=15	n=30	n=7	n=15	n=30
[truncated: 689 more rows]

## Sheet: RR=1 (town resample)
	Means of Ratios								Means of Ratios of Sqrts
[truncated: 691 more rows]

[truncated: 3 more sheets: RR=1.5 (town resample), RR=2 (town resample), RR=3 (town resample)]
